# Supplementary material for: Synthesis and Anticancer Properties of Water-Soluble Zinc Ionophores
Source: Oxford University Press journal article supplement (doi:10.1158/0008-5472.can-08-0601), 2008-07-01
Supplement: 00085472can080601-sup-magda_suppl_tables_1-2.xls [file 00085472can080601-sup-magda_suppl_tables_1-2.xls]

## Sheet: Table 2
Supplementary Table 2. Complete gene expression data for in vitro experiments. Note that a value of "1" indicates "Yes" while a value of "0" indicates "No" for columns Z, AA, AB, AF, AG, and AH. Criteria for signficance involve fold change (FC) ?1.5 and Benjamini-Hochberg corrected Students t-test<0.15 as described in the text.
Probe Set ID	Gene Symbol	Entrez Gene	Gene Title	Mannitol_a	Mannitol_b	Mannitol_c	Geo Mean Mannitol	Zinc_a	Zinc_b	Zinc_c	Geo Mean Zinc	PCI_5002_a	PCI_5002_b	PCI_5002_c	Geo Mean 5002	PCI_5002_Zn_a	PCI_5002_Zn_b	PCI_5002_Zn_c	Geo Mean PCI_5002_Zn		FC Zinc/Mannitol	correctedPvalue([Mannitol] Vs [Zinc])	FC PCI_5002/Mannitol	correctedPvalue([Mannitol] Vs [PCI_5002])	Significant?	Significant Up?	Significant Down?		FC PCI_5002_Zn/Mannitol	correctedPvalue([PCI_5002_Zn] Vs [Control])	Significant?	Significant Up?	Significant Down?
213418_at	HSPA6	3310	heat shock 70kDa protein 6 (HSP70B')	26	23	22	23.6	25	28	19	23.7	40	34	31	34.8	2613	2190	2465	2416.1		1	1	1.5	0.6171	0	0	0		102.3	0.0012	1	1	0
202672_s_at	ATF3	467	activating transcription factor 3	26	29	25	26.4	28	26	26	26.4	30	27	27	28	2164	1973	1939	2022.6		-1	1	1.1	0.9318	0	0	0		76.6	0.001	1	1	0
227404_s_at	EGR1	1958	Early growth response 1	58	62	66	61.8	55	44	67	54.5	67	60	55	60.5	4351	3898	3945	4059.8		-1.14	1	-1	0.9805	0	0	0		65.7	0.001	1	1	0
117_at	HSPA6	3310	heat shock 70kDa protein 6 (HSP70B')	33	31	31	31.8	30	42	30	33.6	43	36	35	37.7	1138	942	908	991.2		1.06	1	1.2	0.8263	0	0	0		31.2	0.0018	1	1	0
227099_s_at	LOC387763	387763	hypothetical LOC387763	13	17	16	15.1	16	15	16	15.5	19	17	16	17.2	335	441	440	402		1.03	1	1.1	0.9035	0	0	0		26.7	0.0044	1	1	0
202014_at	PPP1R15A	23645	protein phosphatase 1, regulatory (inhibitor) subunit 15A	34	38	38	36.4	38	36	36	36.6	33	34	39	34.9	802	821	894	838.3		1	1	-1	0.964	0	0	0		23	0.0013	1	1	0
201694_s_at	EGR1	1958	early growth response 1	25	23	20	22.6	23	23	24	23.2	26	26	26	26	578	505	457	510.9		1.02	1	1.2	0.8619	0	0	0		22.6	0.0039	1	1	0
37028_at	PPP1R15A	23645	protein phosphatase 1, regulatory (inhibitor) subunit 15A	63	58	63	61.5	66	68	64	66.1	65	67	75	68.6	1166	1052	1262	1156.8		1.08	1	1.1	0.859	0	0	0		18.8	0.0016	1	1	0
228846_at	MXD1	4084	MAX dimerization protein 1	24	26	26	25.6	27	28	29	28	33	32	26	30.4	415	471	510	463.5		1.09	1	1.2	0.8544	0	0	0		18.1	0.0019	1	1	0
201466_s_at	JUN	3725	v-jun sarcoma virus 17 oncogene homolog (avian)	23	21	19	20.9	21	14	21	18.4	25	19	20	21.2	327	399	355	359.5		-1.14	1	1	0.9921	0	0	0		17.2	0.0035	1	1	0
209383_at	DDIT3	1649	DNA-damage-inducible transcript 3	73	83	89	81.4	81	81	77	79.8	86	91	83	86.4	1334	1410	1372	1371.7		-1.02	1	1.1	0.9476	0	0	0		16.9	0.0019	1	1	0
228181_at	SLC30A1	7779	solute carrier family 30 (zinc transporter), member 1	97	100	111	102.5	130	116	142	128.9	450	469	428	448.6	1559	1628	1770	1650		1.26	1	4.4	0.0397	1	1	0		16.1	0.0016	1	1	0
223394_at	SERTAD1	29950	SERTA domain containing 1	138	149	149	145.2	145	154	152	150.2	126	144	153	140.8	2112	1994	2134	2079.2		1.03	1	-1	0.9709	0	0	0		14.3	0.001	1	1	0
209189_at	FOS	2353	v-fos FBJ murine osteosarcoma viral oncogene homolog	49	60	49	52.4	60	47	60	55.1	48	44	44	45.2	646	808	798	747		1.05	1	-1.2	0.8662	0	0	0		14.3	0.0053	1	1	0
36711_at	MAFF	23764	v-maf musculoaponeurotic fibrosarcoma oncogene homolog F (avian)	76	90	83	82.9	88	57	97	78.5	94	103	90	95.1	953	1205	1285	1138.5		-1.06	1	1.1	0.8526	0	0	0		13.7	0.006	1	1	0
202340_x_at	NR4A1	3164	nuclear receptor subfamily 4, group A, member 1	93	103	99	97.9	92	89	100	93.4	114	107	108	109.6	1217	1292	1404	1302.1		-1.05	1	1.1	0.7536	0	0	0		13.3	0.0016	1	1	0
202768_at	FOSB	2354	FBJ murine osteosarcoma viral oncogene homolog B	24	22	22	22.5	20	19	19	19.2	28	24	26	26	282	283	321	294.8		-1.17	1	1.2	0.8059	0	0	0		13.1	0.0016	1	1	0
1555370_a_at	CAMTA1	23261	calmodulin binding transcription activator 1	19	18	18	18.3	18	18	20	18.7	24	19	18	20	215	216	250	226.6		1.02	1	1.1	0.9306	0	0	0		12.4	0.0016	1	1	0
216248_s_at	NR4A2	4929	nuclear receptor subfamily 4, group A, member 2	40	47	50	45.4	44	40	46	43.4	53	48	51	50.5	554	540	479	523.3		-1.05	1	1.1	0.9033	0	0	0		11.5	0.004	1	1	0
201464_x_at	JUN	3725	v-jun sarcoma virus 17 oncogene homolog (avian)	57	56	52	54.8	43	39	50	43.7	52	44	48	47.9	652	657	581	629.2		-1.25	1	-1.1	0.836	0	0	0		11.5	0.0016	1	1	0
200664_s_at	DNAJB1	3337	DnaJ (Hsp40) homolog, subfamily B, member 1	261	286	255	266.9	200	219	235	217.3	423	401	325	380.7	3020	2994	3006	3006.6		-1.23	1	1.4	0.6467	0	0	0		11.3	0.0011	1	1	0
200666_s_at	DNAJB1	3337	DnaJ (Hsp40) homolog, subfamily B, member 1	395	428	404	408.7	377	343	413	376.7	576	610	540	574.7	4628	4208	4413	4413		-1.09	1	1.4	0.4052	0	0	0		10.8	0.0011	1	1	0
202859_x_at	IL8	3576	interleukin 8	48	46	47	46.8	49	44	52	48.1	88	89	82	86.4	517	497	488	500.7		1.03	1	1.8	0.0636	1	1	0		10.7	0.0007	1	1	0
204622_x_at	NR4A2	4929	nuclear receptor subfamily 4, group A, member 2	46	47	46	46.4	52	37	50	46	48	51	42	46.9	349	547	526	464.9		-1.01	1	1	0.9897	0	0	0		10	0.0137	1	1	0
204621_s_at	NR4A2	4929	nuclear receptor subfamily 4, group A, member 2	53	56	61	56.5	59	47	64	56.1	59	57	59	58.1	489	546	661	560.8		-1.01	1	1	0.9613	0	0	0		9.9	0.0065	1	1	0
201693_s_at	EGR1	1958	early growth response 1	22	20	17	19.4	20	18	19	18.8	20	24	21	21.5	163	205	210	191.6		-1.04	1	1.1	0.9285	0	0	0		9.9	0.0087	1	1	0
226650_at	ZFAND2A	90637	zinc finger, AN1-type domain 2A	210	234	214	219.5	209	188	234	209.6	313	261	246	271.9	2194	2030	2037	2085.8		-1.05	1	1.2	0.8047	0	0	0		9.5	0.0014	1	1	0
204420_at	FOSL1	8061	FOS-like antigen 1	46	47	46	46.2	49	37	41	41.8	48	47	53	49.1	415	396	437	415.7		-1.1	1	1.1	0.8951	0	0	0		9	0.0011	1	1	0
213268_at	CAMTA1	23261	calmodulin binding transcription activator 1	16	17	17	16.8	18	21	17	18.6	18	15	18	17.2	122	181	155	150.6		1.11	1	1	0.9802	0	0	0		9	0.0106	1	1	0
207574_s_at	GADD45B	4616	growth arrest and DNA-damage-inducible, beta	136	167	156	152.3	144	158	164	155.2	147	148	158	150.7	1301	1332	1376	1336.1		1.02	1	-1	0.9899	0	0	0		8.8	0.0032	1	1	0
225434_at	DEDD2	162989	death effector domain containing 2	328	379	377	360.5	335	312	345	330.5	508	494	471	490.8	3320	2920	3193	3140		-1.09	1	1.4	0.5033	0	0	0		8.7	0.0031	1	1	0
204472_at	GEM	2669	GTP binding protein overexpressed in skeletal muscle	80	86	94	86.4	83	67	88	78.5	74	72	71	72.1	810	650	736	728.9		-1.1	1	-1.2	0.665	0	0	0		8.4	0.0047	1	1	0
223870_at	FBXW10	10517	F-box and WD-40 domain protein 10	30	36	28	31	30	47	37	37.3	42	30	34	34.9	256	238	278	256.8		1.2	1	1.1	0.9404	0	0	0		8.3	0.0061	1	1	0
222830_at	GRHL1	29841	grainyhead-like 1 (Drosophila)	27	28	24	26.3	30	28	30	29.3	45	56	57	52.4	181	234	238	216.1		1.11	1	2	0.4368	0	0	0		8.2	0.0087	1	1	0
221841_s_at	KLF4	9314	Kruppel-like factor 4 (gut)	86	77	70	77.2	75	60	79	70.5	77	84	82	81	595	639	666	632.7		-1.1	1	1	0.9589	0	0	0		8.2	0.004	1	1	0
200800_s_at	HSPA1A /// HSPA1B	3303 /// 3304	heat shock 70kDa protein 1A /// heat shock 70kDa protein 1B	704	704	611	671.6	518	587	695	595.6	2669	2558	2267	2492.3	5195	5141	5710	5342.6		-1.13	1	3.7	0.1014	1	1	0		8	0.0031	1	1	0
208581_x_at	MT1X	4501	metallothionein 1X	893	899	826	872.3	1036	1032	1112	1059.4	7938	7866	7819	7874.4	6652	6390	6739	6592		1.21	1	9	0.0033	1	1	0		7.6	0.0011	1	1	0
209959_at	NR4A3	8013	nuclear receptor subfamily 4, group A, member 3	32	35	35	33.9	35	39	33	35.6	48	46	42	45.1	246	282	230	251.7		1.05	1	1.3	0.5352	0	0	0		7.4	0.0043	1	1	0
220468_at	ARF7	80117	ADP-ribosylation factor 7	19	22	18	19.6	21	19	20	20.1	18	22	25	21.4	105	153	173	140.6		1.02	1	1.1	0.9605	0	0	0		7.2	0.0226	1	1	0
202581_at	HSPA1B	3304	heat shock 70kDa protein 1B	182	168	164	171	110	81	135	106.3	482	542	418	478	1146	1230	1250	1208		-1.61	1	2.8	0.2622	0	0	0		7.1	0.0016	1	1	0
213629_x_at	MT1F	4494	metallothionein 1F (functional)	124	116	115	118.2	155	125	123	133.4	2267	2339	2127	2242.7	901	756	803	818		1.13	1	19	0.0033	1	1	0		6.9	0.0032	1	1	0
209304_x_at	GADD45B	4616	growth arrest and DNA-damage-inducible, beta	99	98	117	104.2	94	115	106	104.7	111	105	104	106.6	807	661	700	720.1		1	1	1	0.9791	0	0	0		6.9	0.0069	1	1	0
204326_x_at	MT1X	4501	metallothionein 1X	770	732	679	725.9	839	830	888	851.9	6621	6112	6045	6254	4946	4887	4948	4926.8		1.17	1	8.6	0.008	1	1	0		6.8	0.0016	1	1	0
206461_x_at	MT1H	4496	metallothionein 1H	474	456	433	454.1	555	507	511	523.7	4322	3891	3550	3908.3	3245	2939	3002	3059.3		1.15	1	8.6	0.0235	1	1	0		6.7	0.0016	1	1	0
217165_x_at	MT1F	4494	metallothionein 1F (functional)	291	276	261	275.8	336	287	317	312.8	3245	3659	3360	3417.2	2042	1794	1720	1846.9		1.13	1	12.4	0.0071	1	1	0		6.7	0.004	1	1	0
206675_s_at	SKIL	6498	SKI-like	28	25	27	26.5	25	25	24	24.6	22	25	22	22.9	163	179	179	173.4		-1.08	1	-1.2	0.8232	0	0	0		6.5	0.0026	1	1	0
243791_at			Transcribed locus	17	16	16	16.5	19	14	19	17.4	17	18	21	18.4	77	96	164	106.7		1.05	1	1.1	0.8856	0	0	0		6.5	0.0475	1	1	0
223195_s_at	SESN2	83667	sestrin 2	86	88	89	87.8	91	71	94	84.6	92	91	95	92.5	556	571	563	563		-1.04	1	1.1	0.791	0	0	0		6.4	0.0007	1	1	0
218486_at	KLF11	8462	Kruppel-like factor 11	32	38	44	37.9	40	26	40	34.4	33	45	44	40.3	196	262	278	242.5		-1.1	1	1.1	0.9747	0	0	0		6.4	0.0205	1	1	0
203665_at	HMOX1	3162	heme oxygenase (decycling) 1	411	429	430	423.4	456	434	477	455.2	1373	1272	1145	1259.7	2775	2538	2795	2700.1		1.08	1	3	0.1014	1	1	0		6.4	0.0014	1	1	0
201531_at	ZFP36	7538	zinc finger protein 36, C3H type, homolog (mouse)	283	305	304	297.3	288	270	303	286.6	331	287	303	306.8	1787	1873	1920	1859.5		-1.04	1	1	0.9631	0	0	0		6.3	0.0014	1	1	0
200798_x_at	MCL1	4170	myeloid cell leukemia sequence 1 (BCL2-related)	243	229	266	245.5	257	222	284	253.3	338	341	338	339.1	1348	1599	1629	1520.1		1.03	1	1.4	0.4368	0	0	0		6.2	0.0063	1	1	0
209305_s_at	GADD45B	4616	growth arrest and DNA-damage-inducible, beta	68	74	71	71.1	72	86	70	75.7	63	68	69	66.7	465	404	447	437.7		1.07	1	-1.1	0.885	0	0	0		6.2	0.0027	1	1	0
210524_x_at				88	85	82	85	92	84	104	93.2	1063	1114	1249	1139.4	626	470	458	512.7		1.1	1	13.4	0.0075	1	1	0		6	0.0119	1	1	0
208744_x_at	HSPH1	10808	heat shock 105kDa/110kDa protein 1	349	370	371	363	321	347	371	346	733	672	547	645.8	2399	2077	2079	2179.8		-1.05	1	1.8	0.4699	0	0	0		6	0.0032	1	1	0
202388_at	RGS2	5997	regulator of G-protein signalling 2, 24kDa	128	132	154	137.3	144	152	171	155.2	190	209	200	199.5	828	827	812	822.3		1.13	1	1.5	0.5161	0	0	0		6	0.004	1	1	0
1556067_a_at	JMJD3	23135	jumonji domain containing 3	40	54	50	47.7	49	57	46	50.6	47	50	49	48.6	263	275	310	281.9		1.06	1	1	0.9867	0	0	0		5.9	0.0116	1	1	0
219199_at	AFF4	27125	AF4/FMR2 family, member 4	23	25	19	22	26	25	22	24.5	22	20	24	22	100	142	150	128.5		1.11	1	1	0.9993	0	0	0		5.9	0.0252	1	1	0
201465_s_at	JUN	3725	v-jun sarcoma virus 17 oncogene homolog (avian)	41	47	33	40.2	42	63	43	48.3	31	42	47	39.6	286	206	219	234.5		1.2	1	-1	0.9927	0	0	0		5.8	0.0224	1	1	0
225956_at	LOC153222	153222	adult retina protein	63	53	61	58.9	67	41	72	58.2	63	71	70	68	272	390	382	343.7		-1.01	1	1.2	0.8427	0	0	0		5.8	0.0182	1	1	0
218611_at	IER5	51278	immediate early response 5	617	652	695	654.1	651	582	648	626.1	569	594	634	598.5	3449	3962	3905	3764.9		-1.04	1	-1.1	0.8694	0	0	0		5.8	0.004	1	1	0
227337_at	ANKRD37	353322	ankyrin repeat domain 37	50	58	53	53.6	62	60	62	61.1	47	60	48	51.5	270	349	297	303.6		1.14	1	-1	0.9755	0	0	0		5.7	0.0095	1	1	0
211506_s_at	IL8	3576	interleukin 8	23	22	25	23.2	32	20	23	24.7	37	32	26	31.4	125	127	142	130.9		1.06	1	1.4	0.7847	0	0	0		5.6	0.004	1	1	0
225557_at	AXUD1	64651	AXIN1 up-regulated 1	58	62	65	61.7	62	60	66	62.4	59	61	65	61.8	307	334	407	346.5		1.01	1	1	0.9982	0	0	0		5.6	0.0103	1	1	0
1561042_at	EMR3	84658	Egf-like module containing, mucin-like, hormone receptor-like 3	14	15	16	15.1	15	14	16	14.9	15	16	17	16	50	105	113	84.3		-1.01	1	1.1	0.9231	0	0	0		5.6	0.0722	1	1	0
207978_s_at	NR4A3	8013	nuclear receptor subfamily 4, group A, member 3	22	19	21	20.3	22	20	17	19.4	23	23	22	22.2	105	120	114	112.9		-1.05	1	1.1	0.8718	0	0	0		5.6	0.0044	1	1	0
212185_x_at	MT2A	4502	metallothionein 2A	1317	1359	1322	1332.4	1525	1586	1585	1564.9	8631	8124	7804	8179.4	7315	6974	7505	7261.2		1.17	1	6.1	0.0069	1	1	0		5.4	0.0011	1	1	0
212099_at	RHOB	388	ras homolog gene family, member B	284	299	282	288.1	285	241	293	271.9	211	227	235	224.1	1507	1517	1623	1548.2		-1.06	1	-1.3	0.4522	0	0	0		5.4	0.0014	1	1	0
1554980_a_at	ATF3	467	activating transcription factor 3	32	39	31	33.7	38	37	34	36.5	37	41	41	39.6	113	214	244	180.7		1.08	1	1.2	0.8619	0	0	0		5.4	0.0693	1	1	0
211456_x_at	RPL35	11224	Similar to 60S ribosomal protein L35	657	660	606	640.3	715	688	708	703.7	4020	4372	4049	4144.1	3663	3392	3253	3431.6		1.1	1	6.5	0.0075	1	1	0		5.4	0.0027	1	1	0
217911_s_at	BAG3	9531	BCL2-associated athanogene 3	607	611	599	605.8	515	547	595	551.3	906	900	825	876	3081	3194	3306	3192		-1.1	1	1.4	0.2797	0	0	0		5.3	0.001	1	1	0
200796_s_at	MCL1	4170	myeloid cell leukemia sequence 1 (BCL2-related)	32	38	27	32	30	49	34	36.8	33	39	37	36.3	140	173	196	168.2		1.15	1	1.1	0.9218	0	0	0		5.3	0.0225	1	1	0
220370_s_at	USP36	57602	ubiquitin specific peptidase 36	32	28	28	29.6	24	23	28	24.8	26	36	29	29.9	120	167	184	154.5		-1.19	1	1	0.9937	0	0	0		5.2	0.0226	1	1	0
235573_at	HSPH1	10808	Heat shock 105kDa/110kDa protein 1	32	31	35	32.6	30	30	38	32.4	55	56	45	51.7	143	193	173	168.5		-1	1	1.6	0.5161	0	0	0		5.2	0.012	1	1	0
213146_at	JMJD3	23135	jumonji domain containing 3	30	30	30	29.9	29	24	29	27.1	29	33	30	30.5	112	183	180	154.3		-1.1	1	1	0.977	0	0	0		5.2	0.0314	1	1	0
201627_s_at	INSIG1	3638	insulin induced gene 1	148	147	140	145	141	113	139	130.1	210	202	174	194.4	711	705	819	743.4		-1.11	1	1.3	0.5765	0	0	0		5.1	0.004	1	1	0
242963_at	MGC26963	166929	hypothetical protein MGC26963	25	26	30	27	27	27	29	27.6	24	25	30	26.3	113	141	160	136.8		1.02	1	-1	0.9798	0	0	0		5.1	0.0172	1	1	0
205193_at	MAFF	23764	v-maf musculoaponeurotic fibrosarcoma oncogene homolog F (avian)	80	64	71	71.4	72	84	75	76.8	87	78	82	82.3	375	351	354	359.9		1.08	1	1.2	0.8619	0	0	0		5	0.0065	1	1	0
202081_at	IER2	9592	immediate early response 2	461	532	524	504.4	451	451	512	470.7	462	454	465	460.4	2445	2587	2588	2539.2		-1.07	1	-1.1	0.8649	0	0	0		5	0.0037	1	1	0
204794_at	DUSP2	1844	dual specificity phosphatase 2	26	23	21	23.7	26	29	22	25.4	31	26	30	28.9	86	147	132	118.2		1.07	1	1.2	0.833	0	0	0		5	0.0382	1	1	0
230180_at	DDX17	10521	DEAD (Asp-Glu-Ala-Asp) box polypeptide 17	168	163	173	168	137	137	185	151.6	169	184	149	166.9	35	34	32	33.7		-1.11	1	-1	0.9927	0	0	0		-5	0.0014	1	0	1
242471_at			Transcribed locus	91	65	69	74.2	82	66	91	78.9	83	81	82	81.9	15	14	15	14.6		1.06	1	1.1	0.9451	0	0	0		-5.1	0.0156	1	0	1
216109_at	THRAP2	23389	Thyroid hormone receptor associated protein 2	66	63	65	64.6	64	46	65	57.4	55	65	63	61	11	12	15	12.5		-1.12	1	-1.1	0.9299	0	0	0		-5.2	0.0102	1	0	1
227223_at	RNPC2	9584	RNA-binding region (RNP1, RRM) containing 2	182	190	181	184.4	167	158	213	177.9	182	187	160	176.1	30	42	36	35.5		-1.04	1	-1	0.9477	0	0	0		-5.2	0.0129	1	0	1
236610_at	PDE4D	5144	Phosphodiesterase 4D, cAMP-specific (phosphodiesterase E3 dunce homolog, Drosophila)	176	132	171	158.3	192	159	182	177.3	191	191	184	188.5	23	26	44	29.8		1.12	1	1.2	0.8702	0	0	0		-5.3	0.0556	1	0	1
237086_at				84	98	98	93	83	63	103	81.4	99	115	107	107	14	18	21	17.1		-1.14	1	1.2	0.8612	0	0	0		-5.4	0.0205	1	0	1
229434_at	HNRPD	3184	Heterogeneous nuclear ribonucleoprotein D (AU-rich element RNA binding protein 1, 37kDa)	142	117	130	129.2	141	109	162	135.6	145	159	158	154	20	22	28	23.5		1.05	1	1.2	0.7972	0	0	0		-5.5	0.0163	1	0	1
1566901_at	TGIF	7050	TGFB-induced factor (TALE family homeobox)	68	88	87	80.3	69	59	91	71.7	64	63	77	67.7	14	13	17	14.4		-1.12	1	-1.2	0.8926	0	0	0		-5.6	0.0167	1	0	1
238156_at	RPS6	6194	Ribosomal protein S6	174	187	173	178.1	179	132	198	167	165	202	207	190.2	33	28	34	31.7		-1.07	1	1.1	0.948	0	0	0		-5.6	0.0044	1	0	1
1556629_a_at	SNAP25	6616	Synaptosomal-associated protein, 25kDa	118	111	125	117.7	127	91	138	117	130	131	133	131.3	18	21	24	20.9		-1.01	1	1.1	0.7629	0	0	0		-5.6	0.0112	1	0	1
233599_at	C9orf3	84909	Chromosome 9 open reading frame 3	203	177	190	189.8	178	179	215	189.8	183	152	157	163.2	41	27	35	33.6		1	1	-1.2	0.8466	0	0	0		-5.6	0.018	1	0	1
209446_s_at				111	128	115	117.9	109	103	136	115.3	90	125	97	102.7	17	24	22	20.8		-1.02	1	-1.1	0.9146	0	0	0		-5.7	0.0165	1	0	1
229150_at	MLPH	79083	Melanophilin	169	162	172	167.7	164	129	174	154.1	180	174	158	170.5	33	27	22	26.9		-1.09	1	1	0.9779	0	0	0		-6.2	0.0138	1	0	1
242343_x_at	ZNF518	9849	Zinc finger protein 518	204	152	162	171.3	159	137	200	163.1	189	172	184	181.4	18	25	37	25.4		-1.05	1	1.1	0.9642	0	0	0		-6.7	0.0453	1	0	1
230097_at	GART	2618	Phosphoribosylglycinamide formyltransferase, phosphoribosylglycinamide synthetase, phosphoribosylaminoimidazole synthetase	134	116	124	124.5	127	96	124	114.6	162	146	128	144.7	15	20	20	18.1		-1.09	1	1.2	0.8733	0	0	0		-6.9	0.0111	1	0	1
239576_at	MTUS1	57509	Mitochondrial tumor suppressor 1	141	128	129	132.5	137	126	147	136.3	117	117	123	119	23	17	16	18.2		1.03	1	-1.1	0.7636	0	0	0		-7.3	0.0124	1	0	1
232431_at	NR3C1	2908	Nuclear receptor subfamily 3, group C, member 1 (glucocorticoid receptor)	149	109	115	122.9	129	85	139	115.1	120	135	120	125	17	15	17	16.4		-1.07	1	1	0.9903	0	0	0		-7.5	0.0099	1	0	1
230333_at	SAT	6303	Spermidine/spermine N1-acetyltransferase	1509	1365	1551	1472.9	1558	1488	1591	1545.1	1308	1236	1278	1273.4	202	191	194	195.7		1.05	1	-1.2	0.7181	0	0	0		-7.5	0.0016	1	0	1
242671_at	MID1	4281	Midline 1 (Opitz/BBB syndrome)	392	335	350	358.2	406	308	369	358.4	362	347	361	356.5	36	45	53	44.2		1	1	-1	0.9927	0	0	0		-8.1	0.0118	1	0	1
217626_at	AKR1C1 /// AKR1C2	1645 /// 1646	aldo-keto reductase family 1, member C1 (dihydrodiol dehydrogenase 1; 20-alpha (3-alpha)-hydroxysteroid dehydrogenase) /// aldo-keto reductase family 1, member C2 (dihydrodiol dehydrogenase 2; bile acid binding protein; 3-alpha hydroxysteroid dehydrogenase, type III)	1475	1478	1408	1453.2	1332	1414	1569	1435	1223	1300	1182	1234.3	139	115	157	136		-1.01	1	-1.2	0.5523	0	0	0		-10.7	0.0059	1	0	1
212722_s_at	PTDSR	23210	phosphatidylserine receptor	123	118	118	120	99	97	126	106.7	136	145	159	146.6	589	579	595	587.6		-1.12	1	1.2	0.6352	0	0	0		4.9	0.0009	1	1	0
203821_at	HBEGF	1839	heparin-binding EGF-like growth factor	35	36	35	35.3	40	33	33	35.2	39	36	37	37.3	171	182	160	171.1		-1	1	1.1	0.8555	0	0	0		4.8	0.0024	1	1	0
221667_s_at	HSPB8	26353	heat shock 22kDa protein 8	109	122	129	119.7	132	103	128	120.5	149	165	162	158.7	507	600	641	579.9		1.01	1	1.3	0.5671	0	0	0		4.8	0.0108	1	1	0
214056_at	MCL1	4170	Myeloid cell leukemia sequence 1 (BCL2-related)	48	49	58	51.4	46	35	47	42.4	66	59	49	57.7	241	275	232	248.6		-1.21	1	1.1	0.928	0	0	0		4.8	0.0091	1	1	0
205192_at	MAP3K14	9020	mitogen-activated protein kinase kinase kinase 14	52	56	52	53.4	49	39	40	42.4	50	48	50	49.2	231	265	279	257.6		-1.26	1	-1.1	0.8101	0	0	0		4.8	0.0061	1	1	0
242727_at	ARL8	221079	ADP-ribosylation factor-like 8	23	18	20	20.3	24	14	21	19.2	23	27	24	24.7	61	125	123	97.7		-1.06	1	1.2	0.8434	0	0	0		4.8	0.0792	1	1	0
223196_s_at	SESN2	83667	sestrin 2	38	48	48	44.3	48	57	53	52.3	44	46	57	48.6	217	191	223	210.1		1.18	1	1.1	0.9515	0	0	0		4.7	0.012	1	1	0
239439_at	AFF4	27125	AF4/FMR2 family, member 4	18	17	17	17.5	15	17	18	16.5	18	18	17	17.8	54	98	107	82.6		-1.06	1	1	0.9614	0	0	0		4.7	0.0608	1	1	0
206374_at	DUSP8	1850	dual specificity phosphatase 8	39	33	32	34.3	32	32	37	33.5	34	40	33	35.5	170	149	162	160		-1.02	1	1	0.9761	0	0	0		4.7	0.0084	1	1	0
207714_s_at	SERPINH1	871	serpin peptidase inhibitor, clade H (heat shock protein 47), member 1, (collagen binding protein 1)	230	263	233	241.5	262	226	275	253.5	367	354	381	367.1	1227	1022	1118	1119.1		1.05	1	1.5	0.3815	0	0	0		4.6	0.0073	1	1	0
202241_at	TRIB1	10221	tribbles homolog 1 (Drosophila)	363	371	385	372.7	387	352	418	384.9	400	414	401	405	1768	1626	1779	1722.8		1.03	1	1.1	0.6552	0	0	0		4.6	0.0019	1	1	0
201626_at	INSIG1	3638	insulin induced gene 1	303	296	302	300.2	263	202	273	243.9	442	444	390	424.5	1313	1431	1421	1387.2		-1.23	1	1.4	0.4052	0	0	0		4.6	0.0014	1	1	0
203811_s_at	DNAJB4	11080	DnaJ (Hsp40) homolog, subfamily B, member 4	60	61	52	57.8	49	46	60	51.2	67	66	63	65.5	226	292	280	264.5		-1.13	1	1.1	0.8287	0	0	0		4.6	0.0132	1	1	0
210090_at	ARC	23237	activity-regulated cytoskeleton-associated protein	27	26	24	25.5	22	37	25	27.6	25	31	31	28.8	109	121	121	116.5		1.09	1	1.1	0.9033	0	0	0		4.6	0.0033	1	1	0
204745_x_at	MT1G	4495	metallothionein 1G	276	268	311	284.4	317	307	304	309	1779	1793	1494	1683	1545	1217	1170	1300.5		1.09	1	5.9	0.0636	1	1	0		4.6	0.0145	1	1	0
205249_at	EGR2	1959	early growth response 2 (Krox-20 homolog, Drosophila)	15	14	15	14.7	16	16	15	15.6	14	13	14	13.8	45	71	94	67.1		1.06	1	-1.1	0.8318	0	0	0		4.6	0.0642	1	1	0
218631_at	AVPI1	60370	arginine vasopressin-induced 1	298	332	315	314.6	286	306	317	302.7	326	322	339	329.1	1518	1326	1447	1428.2		-1.04	1	1	0.9138	0	0	0		4.5	0.0041	1	1	0
1556066_at	JMJD3	23135	jumonji domain containing 3	58	59	64	60.3	55	83	65	66.8	61	64	60	61.6	278	254	290	273.7		1.11	1	1	0.9628	0	0	0		4.5	0.004	1	1	0
201925_s_at	DAF	1604	decay accelerating factor for complement (CD55, Cromer blood group system)	215	196	225	211.4	239	196	213	215.4	224	233	244	233.7	885	948	1019	949.1		1.02	1	1.1	0.8554	0	0	0		4.5	0.0055	1	1	0
203810_at	DNAJB4	11080	DnaJ (Hsp40) homolog, subfamily B, member 4	117	122	120	119.7	108	75	117	98.1	131	148	119	132.2	462	563	579	532.3		-1.22	1	1.1	0.8955	0	0	0		4.4	0.0087	1	1	0
207147_at	DLX2	1746	distal-less homeo box 2	17	21	16	17.8	17	17	16	16.4	19	19	20	19.3	65	80	96	79.3		-1.09	1	1.1	0.9504	0	0	0		4.4	0.0298	1	1	0
206976_s_at	HSPH1	10808	heat shock 105kDa/110kDa protein 1	783	744	768	764.8	767	638	730	709.5	1417	1440	1266	1371.9	2856	3649	3768	3399		-1.08	1	1.8	0.2244	0	0	0		4.4	0.0126	1	1	0
1564414_a_at	PNLDC1	154197	poly(A)-specific ribonuclease (PARN)-like domain containing 1	17	15	15	15.7	16	19	13	15.9	20	17	16	17.5	58	70	81	69.1		1.01	1	1.1	0.9033	0	0	0		4.4	0.0172	1	1	0
213124_at	ZNF473	25888	zinc finger protein 473	65	69	61	65	63	71	62	65.4	73	66	66	68.6	260	288	309	285.2		1.01	1	1.1	0.9296	0	0	0		4.4	0.0065	1	1	0
201044_x_at	DUSP1	1843	dual specificity phosphatase 1	82	76	71	76.2	71	83	82	78.8	84	81	88	84.2	311	312	363	327.8		1.03	1	1.1	0.8405	0	0	0		4.3	0.0073	1	1	0
221577_x_at	GDF15	9518	growth differentiation factor 15	153	169	169	163.3	172	161	179	170.4	168	199	214	192.8	694	674	713	693.3		1.04	1	1.2	0.8554	0	0	0		4.2	0.0027	1	1	0
202068_s_at	LDLR	3949	low density lipoprotein receptor (familial hypercholesterolemia)	267	295	287	282.6	267	286	292	281.4	265	292	290	282.1	1077	1220	1216	1169.3		-1	1	-1	0.9979	0	0	0		4.1	0.0046	1	1	0
211924_s_at	PLAUR	5329	plasminogen activator, urokinase receptor /// plasminogen activator, urokinase receptor	147	167	162	158.5	168	146	169	160.9	168	152	154	157.8	656	671	635	653.9		1.02	1	-1	0.9937	0	0	0		4.1	0.0033	1	1	0
212907_at	SLC30A1	7779	Solute carrier family 30 (zinc transporter), member 1	794	766	749	769.2	1029	951	1086	1020.8	4034	3982	3736	3915	3318	3061	3141	3171.6		1.33	1	5.1	0.0069	1	1	0		4.1	0.0016	1	1	0
212723_at	PTDSR	23210	phosphatidylserine receptor	388	401	373	387.1	316	356	354	341.8	476	491	431	465.3	1609	1580	1578	1588.9		-1.13	1	1.2	0.6296	0	0	0		4.1	0.0011	1	1	0
225957_at	LOC153222	153222	adult retina protein	41	42	41	41.2	46	42	59	48.2	46	49	43	45.5	108	194	230	168.8		1.17	1	1.1	0.8121	0	0	0		4.1	0.082	1	1	0
220266_s_at	KLF4	9314	Kruppel-like factor 4 (gut)	26	28	34	29.3	29	32	33	31.1	31	26	32	29.4	109	115	130	117.5		1.06	1	1	0.9989	0	0	0		4	0.0151	1	1	0
218559_s_at	MAFB	9935	v-maf musculoaponeurotic fibrosarcoma oncogene homolog B (avian)	14	15	13	13.8	17	15	14	15.1	13	13	15	13.6	44	66	55	54.3		1.09	1	-1	0.9805	0	0	0		3.9	0.0276	1	1	0
201041_s_at	DUSP1	1843	dual specificity phosphatase 1	954	990	1052	997.7	968	976	1124	1020.2	1177	1151	1172	1166.7	3703	3972	4012	3893.3		1.02	1	1.2	0.5378	0	0	0		3.9	0.0031	1	1	0
238825_at	ACRC	93953	acidic repeat containing	17	18	22	18.7	24	23	24	23.6	19	23	22	21.3	73	78	65	71.9		1.26	1	1.1	0.9035	0	0	0		3.8	0.017	1	1	0
201473_at	JUNB	3726	jun B proto-oncogene	158	165	166	163.2	160	150	171	159.9	133	144	145	140.6	531	641	684	614.9		-1.02	1	-1.2	0.5765	0	0	0		3.8	0.012	1	1	0
212803_at	NAB2	4665	NGFI-A binding protein 2 (EGR1 binding protein 2)	55	62	61	59.3	62	60	61	60.9	71	70	69	69.8	237	197	232	221.2		1.03	1	1.2	0.67	0	0	0		3.7	0.0112	1	1	0
240089_at	NFE2L3	9603	Nuclear factor (erythroid-derived 2)-like 3	19	15	16	16.7	16	12	16	14.3	15	14	14	14.1	47	65	76	61.4		-1.16	1	-1.2	0.8372	0	0	0		3.7	0.0458	1	1	0
38037_at	HBEGF	1839	heparin-binding EGF-like growth factor	27	27	23	25.6	26	26	25	25.4	28	26	26	26.7	82	103	98	93.9		-1.01	1	1	0.9589	0	0	0		3.7	0.0157	1	1	0
208187_s_at				21	18	16	18.3	18	20	18	18.5	17	19	16	17.5	50	71	86	67.2		1.01	1	-1	0.969	0	0	0		3.7	0.0573	1	1	0
228250_at	KIAA1961	96459	KIAA1961 gene	54	74	65	63.9	66	42	56	53.5	68	74	56	65.5	215	243	243	233.3		-1.19	1	1	0.9879	0	0	0		3.7	0.0192	1	1	0
219966_x_at	BANP	54971	BTG3 associated nuclear protein	132	157	147	144.8	125	123	148	131.7	250	232	202	227.4	546	504	528	525.6		-1.1	1	1.6	0.5241	0	0	0		3.6	0.0068	1	1	0
209238_at	STX3A	6809	syntaxin 3A	62	69	81	70.1	61	75	64	66.6	78	80	82	80.2	228	248	291	254.2		-1.05	1	1.1	0.8905	0	0	0		3.6	0.0228	1	1	0
210845_s_at	PLAUR	5329	plasminogen activator, urokinase receptor	168	214	208	195.6	203	192	222	205.2	186	185	203	191.3	704	697	722	707.7		1.05	1	-1	0.9842	0	0	0		3.6	0.0126	1	1	0
216336_x_at	MT1K	4499	Metallothionein 1M	209	180	198	195.3	225	181	183	195.5	1062	941	862	951.2	763	674	683	705.6		1	1	4.9	0.0898	1	1	0		3.6	0.0079	1	1	0
223467_at	RASD1	51655	RAS, dexamethasone-induced 1	50	53	54	52.3	47	77	55	58.5	44	54	43	46.5	163	199	207	188.7		1.12	1	-1.1	0.9028	0	0	0		3.6	0.0129	1	1	0
219228_at	ZNF331	55422	zinc finger protein 331	130	137	140	135.9	134	132	153	139.4	204	185	208	198.8	461	466	543	488.4		1.03	1	1.5	0.3746	0	0	0		3.6	0.0075	1	1	0
241985_at	JMY	133746	junction-mediating and regulatory protein	18	17	17	17.6	20	15	18	17.5	17	22	18	18.9	43	86	67	63.1		-1.01	1	1.1	0.9285	0	0	0		3.6	0.0785	1	1	0
204285_s_at	PMAIP1	5366	phorbol-12-myristate-13-acetate-induced protein 1	188	223	215	207.9	204	158	248	200.1	195	218	208	206.7	681	752	802	743.3		-1.04	1	-1	0.9927	0	0	0		3.6	0.0114	1	1	0
241722_x_at			Transcribed locus, moderately similar to XP_512541.1 PREDICTED: similar to hypothetical protein [Pan troglodytes]	56	48	44	49.2	50	41	51	47.1	51	57	57	54.6	166	155	207	174.6		-1.04	1	1.1	0.9122	0	0	0		3.6	0.0258	1	1	0
211143_x_at	NR4A1	3164	nuclear receptor subfamily 4, group A, member 1	35	40	40	38.4	37	39	37	37.4	40	38	41	39.9	151	145	115	136		-1.03	1	1	0.9552	0	0	0		3.5	0.0198	1	1	0
202669_s_at	EFNB2	1948	ephrin-B2	34	31	30	31.5	31	36	36	34	41	38	41	40.3	113	100	121	111.2		1.08	1	1.3	0.5488	0	0	0		3.5	0.0103	1	1	0
202842_s_at	DNAJB9	4189	DnaJ (Hsp40) homolog, subfamily B, member 9	208	232	236	224.9	228	177	247	215.3	265	273	244	260.5	765	806	800	790.1		-1.04	1	1.2	0.7868	0	0	0		3.5	0.0041	1	1	0
202843_at	DNAJB9	4189	DnaJ (Hsp40) homolog, subfamily B, member 9	42	33	51	41.6	38	27	38	33.9	36	49	42	42.1	106	171	169	145.2		-1.22	1	1	0.9947	0	0	0		3.5	0.0792	1	1	0
209457_at	DUSP5	1847	dual specificity phosphatase 5	144	171	159	157.6	134	124	156	137.5	163	178	167	169.4	556	503	594	549.8		-1.15	1	1.1	0.9145	0	0	0		3.5	0.0114	1	1	0
218023_s_at	FAM53C	51307	family with sequence similarity 53, member C	156	170	163	163	163	159	165	162.4	169	162	169	166.7	562	544	593	566		-1	1	1	0.9536	0	0	0		3.5	0.0031	1	1	0
218566_s_at	CHORDC1	26973	cysteine and histidine-rich domain (CHORD)-containing 1	451	404	423	425.3	378	328	393	365.4	700	790	716	734.2	1176	1723	1580	1473.9		-1.16	1	1.7	0.2797	0	0	0		3.5	0.0308	1	1	0
242062_at	SAMD8	142891	sterile alpha motif domain containing 8	29	26	30	28	26	22	27	25.1	29	28	25	27.3	74	105	112	95.3		-1.11	1	-1	0.9796	0	0	0		3.4	0.0403	1	1	0
228343_at	POU2F2	5452	POU domain, class 2, transcription factor 2	13	14	14	13.8	13	12	14	12.9	14	14	13	13.5	37	48	59	46.9		-1.07	1	-1	0.97	0	0	0		3.4	0.0429	1	1	0
224367_at	BEX2	84707	brain expressed X-linked 2 /// brain expressed X-linked 2	39	39	39	38.9	35	32	36	34.3	38	42	34	37.8	96	160	150	132.2		-1.13	1	-1	0.9704	0	0	0		3.4	0.0553	1	1	0
221704_s_at	VPS37B	79720	vacuolar protein sorting 37B (yeast) /// vacuolar protein sorting 37B (yeast)	68	91	89	82.2	78	91	90	86	71	92	98	86.2	272	272	292	278.8		1.05	1	1	0.9796	0	0	0		3.4	0.0216	1	1	0
213310_at	EIF2C2	27161	Eukaryotic translation initiation factor 2C, 2	84	85	81	83.3	82	67	92	79.6	88	94	90	90.5	271	271	298	279.8		-1.05	1	1.1	0.7181	0	0	0		3.4	0.0032	1	1	0
217168_s_at	HERPUD1	9709	homocysteine-inducible, endoplasmic reticulum stress-inducible, ubiquitin-like domain member 1	460	497	489	482	484	452	498	477.4	468	508	500	491.5	1247	1839	1833	1613.9		-1.01	1	1	0.9669	0	0	0		3.3	0.0381	1	1	0
210269_s_at	DXYS155E	8227	DNA segment on chromosome X and Y (unique) 155 expressed sequence	39	56	48	46.9	55	57	65	59.2	46	61	60	55	138	160	173	156.2		1.26	1	1.2	0.9277	0	0	0		3.3	0.0355	1	1	0
223380_s_at	LATS2	26524	LATS, large tumor suppressor, homolog 2 (Drosophila)	169	167	192	175.8	198	140	197	176.1	230	242	252	241.2	476	674	613	581.7		1	1	1.4	0.496	0	0	0		3.3	0.0295	1	1	0
205239_at	AREG	374	amphiregulin (schwannoma-derived growth factor)	122	129	121	124.1	131	109	141	126.4	126	145	156	142	372	419	437	408.1		1.02	1	1.1	0.8555	0	0	0		3.3	0.0069	1	1	0
218880_at	FOSL2	2355	FOS-like antigen 2	45	53	56	51.2	55	43	71	55	47	66	66	58.9	155	173	178	168.3		1.08	1	1.2	0.934	0	0	0		3.3	0.0157	1	1	0
209015_s_at	DNAJB6	10049	DnaJ (Hsp40) homolog, subfamily B, member 6	121	126	128	124.9	119	88	132	111.6	109	148	142	131.8	360	428	449	410.6		-1.12	1	1.1	0.9687	0	0	0		3.3	0.012	1	1	0
200880_at	DNAJA1	3301	DnaJ (Hsp40) homolog, subfamily A, member 1	830	833	817	826.2	749	675	823	746.7	1310	1306	1311	1309	2275	2867	2973	2686.8		-1.11	1	1.6	0.0033	1	1	0		3.3	0.0175	1	1	0
204286_s_at	PMAIP1	5366	phorbol-12-myristate-13-acetate-induced protein 1	129	126	134	129.6	125	94	123	113.3	129	140	123	130.4	382	450	426	418.3		-1.14	1	1	0.9899	0	0	0		3.2	0.0069	1	1	0
1555950_a_at	DAF	1604	decay accelerating factor for complement (CD55, Cromer blood group system)	196	231	228	217.8	221	199	221	213.4	219	224	231	224.8	679	704	721	701.1		-1.02	1	1	0.9673	0	0	0		3.2	0.0087	1	1	0
205543_at	HSPA4L	22824	heat shock 70kDa protein 4-like	77	92	81	83	74	45	83	64.8	105	104	91	99.7	243	272	286	266.5		-1.28	1	1.2	0.8059	0	0	0		3.2	0.013	1	1	0
225142_at	KIAA1718	80853	KIAA1718 protein	16	15	14	15	17	15	16	16	16	14	14	14.5	33	52	64	48		1.07	1	-1	0.9759	0	0	0		3.2	0.09	1	1	0
236898_at			Transcribed locus	25	32	37	31	30	41	36	35.4	32	35	32	32.7	96	96	105	99		1.14	1	1.1	0.9744	0	0	0		3.2	0.0361	1	1	0
228928_x_at	BANP	54971	BTG3 associated nuclear protein	150	162	149	153.9	124	146	160	142.6	243	211	216	223	483	480	496	486.3		-1.08	1	1.4	0.4361	0	0	0		3.2	0.0023	1	1	0
221986_s_at	KLHL24	54800	kelch-like 24 (Drosophila)	23	23	23	23	23	26	22	23.5	21	26	19	21.9	64	76	79	72.6		1.02	1	-1.1	0.966	0	0	0		3.2	0.0121	1	1	0
238476_at	LOC153222	153222	adult retina protein	24	22	27	24.4	33	17	31	26.2	27	33	24	27.9	51	96	91	76.4		1.07	1	1.1	0.9168	0	0	0		3.1	0.0995	1	1	0
1556823_s_at				25	26	23	24.6	23	35	23	26.7	25	26	23	24.7	69	72	91	76.7		1.08	1	1	0.9947	0	0	0		3.1	0.023	1	1	0
201926_s_at	DAF	1604	decay accelerating factor for complement (CD55, Cromer blood group system)	176	197	194	188.8	201	160	199	185.7	188	203	196	195.6	517	628	625	587.4		-1.02	1	1	0.9506	0	0	0		3.1	0.0145	1	1	0
202880_s_at	PSCD1	9267	pleckstrin homology, Sec7 and coiled-coil domains 1(cytohesin 1)	78	82	79	79.5	68	72	90	76.1	83	83	97	87.5	219	242	286	247.3		-1.05	1	1.1	0.8796	0	0	0		3.1	0.0169	1	1	0
225066_at				29	26	22	25.6	25	21	21	22.2	26	28	24	25.8	78	77	83	79.4		-1.16	1	1	0.994	0	0	0		3.1	0.0169	1	1	0
228996_at	RC3H1	149041	ring finger and CCCH-type zinc finger domains 1	32	35	32	32.9	29	25	34	29	29	34	30	30.6	82	117	108	101		-1.13	1	-1.1	0.9145	0	0	0		3.1	0.0334	1	1	0
219270_at	MGC4504	79094	hypothetical protein MGC4504	35	32	30	32.1	31	33	33	32	40	42	35	39	92	104	98	98.2		-1	1	1.2	0.791	0	0	0		3.1	0.0102	1	1	0
226284_at	ZBTB2	57621	zinc finger and BTB domain containing 2	82	78	77	79	82	71	79	77.2	129	144	139	137.1	226	256	243	241		-1.02	1	1.7	0.2	0	0	0		3.1	0.0046	1	1	0
205945_at	IL6R	3570	interleukin 6 receptor /// interleukin 6 receptor	57	71	53	59.9	54	40	62	50.9	46	53	60	52.8	161	169	224	182.5		-1.18	1	-1.1	0.9324	0	0	0		3	0.0473	1	1	0
1554462_a_at	DNAJB9	4189	DnaJ (Hsp40) homolog, subfamily B, member 9	113	112	122	115.6	121	96	128	114.4	137	145	132	137.9	260	396	415	349.6		-1.01	1	1.2	0.596	0	0	0		3	0.0603	1	1	0
231416_at	DHDH	27294	dihydrodiol dehydrogenase (dimeric)	32	30	29	30.2	28	30	27	28.6	31	29	31	30.1	91	79	104	90.9		-1.06	1	-1	0.9953	0	0	0		3	0.0205	1	1	0
227452_at		440462	Hypothetical protein LOC284072	134	158	153	147.9	144	129	166	145.4	162	157	152	156.8	436	430	467	444.3		-1.02	1	1.1	0.9309	0	0	0		3	0.0095	1	1	0
206115_at	EGR3	1960	early growth response 3	14	14	15	14.1	14	14	14	13.7	11	12	16	12.9	25	57	52	42.1		-1.03	1	-1.1	0.9607	0	0	0		3	0.1552	0	0	0
202067_s_at	LDLR	3949	low density lipoprotein receptor (familial hypercholesterolemia)	43	58	52	50.8	51	62	61	57.7	51	58	50	53	124	151	179	149.8		1.14	1	1	0.9751	0	0	0		3	0.0502	1	1	0
209706_at	NKX3-1	4824	NK3 transcription factor related, locus 1 (Drosophila)	55	58	69	60.3	56	54	54	55	56	71	68	64.4	158	177	200	177.7		-1.1	1	1.1	0.9631	0	0	0		2.9	0.0267	1	1	0
213139_at	SNAI2	6591	snail homolog 2 (Drosophila)	19	25	21	21.4	23	23	20	21.9	18	20	21	19.9	53	70	67	62.8		1.02	1	-1.1	0.9542	0	0	0		2.9	0.0395	1	1	0
219382_at	SERTAD3	29946	SERTA domain containing 3	120	151	136	134.9	124	119	139	126.8	94	112	109	104.7	355	427	405	394.2		-1.06	1	-1.3	0.7799	0	0	0		2.9	0.0217	1	1	0
205932_s_at	MSX1	4487	msh homeo box homolog 1 (Drosophila)	55	62	62	59.6	56	40	63	51.8	58	81	68	68	141	180	207	174.1		-1.15	1	1.1	0.9168	0	0	0		2.9	0.0395	1	1	0
202719_s_at	TES	26136	testis derived transcript (3 LIM domains)	131	136	130	132.5	125	121	154	132.7	166	177	160	167.9	377	370	414	386.6		1	1	1.3	0.4368	0	0	0		2.9	0.0044	1	1	0
223912_s_at	CLN8	2055	ceroid-lipofuscinosis, neuronal 8 (epilepsy, progressive with mental retardation)	104	116	130	116.3	110	85	132	107	116	138	128	127	318	334	365	338.8		-1.09	1	1.1	0.9296	0	0	0		2.9	0.0169	1	1	0
225827_at	EIF2C2	27161	eukaryotic translation initiation factor 2C, 2	244	274	277	264.4	238	241	295	256.9	286	291	300	292.1	686	801	830	769.6		-1.03	1	1.1	0.8372	0	0	0		2.9	0.0159	1	1	0
242088_at	KLHL24	54800	kelch-like 24 (Drosophila)	11	11	10	10.9	14	10	12	11.7	10	11	12	11.1	18	40	43	31.8		1.07	1	1	0.98	0	0	0		2.9	0.1758	0	0	0
213056_at	FRMD4B	23150	FERM domain containing 4B	67	72	73	70.7	75	57	75	68.9	67	77	71	71.2	184	210	225	205.5		-1.03	1	1	0.991	0	0	0		2.9	0.0133	1	1	0
233186_s_at	BANP	54971	BTG3 associated nuclear protein	55	53	55	54.4	65	46	52	54	84	78	77	79.8	152	154	164	157		-1.01	1	1.5	0.2354	0	0	0		2.9	0.0023	1	1	0
200799_at	HSPA1A	3303	heat shock 70kDa protein 1A	1842	1623	1704	1720.8	1408	1264	1620	1423.4	3681	4181	3434	3752.7	4369	5121	5475	4966.5		-1.21	1	2.2	0.2797	0	0	0		2.9	0.0179	1	1	0
203752_s_at	JUND	3727	jun D proto-oncogene	524	614	546	560.1	538	540	565	547.7	590	607	637	611.2	1574	1541	1739	1615.6		-1.02	1	1.1	0.8912	0	0	0		2.9	0.0119	1	1	0
203624_at	DXYS155E	8227	DNA segment on chromosome X and Y (unique) 155 expressed sequence	306	306	320	310.8	315	293	304	303.6	305	290	307	300.4	902	880	903	894.9		-1.02	1	-1	0.9033	0	0	0		2.9	0.0013	1	1	0
209020_at	C20orf111	51526	chromosome 20 open reading frame 111	140	162	177	158.9	151	136	162	149.2	149	151	146	149	449	458	463	456.5		-1.06	1	-1.1	0.9451	0	0	0		2.9	0.0156	1	1	0
221563_at	DUSP10	11221	dual specificity phosphatase 10	43	39	40	41.1	40	41	43	41.6	42	49	49	46.8	98	133	124	117.5		1.01	1	1.1	0.8404	0	0	0		2.9	0.0272	1	1	0
205579_at	HRH1	3269	histamine receptor H1	19	25	18	20.5	21	17	20	19.1	24	22	23	23.1	42	74	64	58.5		-1.07	1	1.1	0.9217	0	0	0		2.8	0.1033	1	1	0
204995_at	CDK5R1	8851	cyclin-dependent kinase 5, regulatory subunit 1 (p35)	18	19	20	19.4	20	18	21	19.6	19	21	23	21.1	35	67	70	54.9		1.01	1	1.1	0.8926	0	0	0		2.8	0.1298	1	1	0
202147_s_at	IFRD1	3475	interferon-related developmental regulator 1	86	95	86	88.8	77	87	89	84.2	91	110	107	102.5	215	271	271	251		-1.05	1	1.2	0.8544	0	0	0		2.8	0.0225	1	1	0
214683_s_at	CLK1	1195	CDC-like kinase 1	176	165	193	177.6	183	147	187	171.6	156	198	188	180.1	436	548	527	501.3		-1.03	1	1	0.9899	0	0	0		2.8	0.0218	1	1	0
220941_s_at	C21orf91	54149	chromosome 21 open reading frame 91	23	23	33	25.7	24	33	27	27.5	27	30	23	26.6	75	81	62	72.3		1.07	1	1	0.9864	0	0	0		2.8	0.0647	1	1	0
1553962_s_at	RHOB	388	ras homolog gene family, member B	31	36	32	32.8	33	38	31	33.7	23	30	28	27	79	95	103	91.7		1.03	1	-1.2	0.8383	0	0	0		2.8	0.024	1	1	0
229830_at	PDGFA	5154	Platelet-derived growth factor alpha polypeptide	129	122	132	127.5	99	115	132	114.5	129	143	128	133	322	376	368	354.7		-1.11	1	1	0.9386	0	0	0		2.8	0.0103	1	1	0
215458_s_at	SMURF1	57154	SMAD specific E3 ubiquitin protein ligase 1	37	38	37	37.1	38	39	37	38.1	38	36	42	38.5	95	103	111	103		1.03	1	1	0.9437	0	0	0		2.8	0.0078	1	1	0
208922_s_at	NXF1	10482	nuclear RNA export factor 1	133	172	170	157.4	153	157	165	158.4	146	160	166	156.8	433	414	465	437		1.01	1	-1	0.997	0	0	0		2.8	0.0257	1	1	0
230655_at			Transcribed locus, weakly similar to NP_997349.1 FLJ46489 protein [Homo sapiens]	41	43	39	41.1	40	35	50	41.4	48	41	47	45.1	98	119	127	114.1		1.01	1	1.1	0.8852	0	0	0		2.8	0.0217	1	1	0
214696_at	MGC14376	84981	hypothetical protein MGC14376	73	84	83	79.9	76	84	87	82.1	83	84	78	81.7	199	239	227	221.1		1.03	1	1	0.9744	0	0	0		2.8	0.0166	1	1	0
226208_at	ZSWIM6	57688	zinc finger, SWIM-type containing 6	229	237	241	235.5	222	223	254	232.8	254	251	257	254	560	708	684	647.4		-1.01	1	1.1	0.5765	0	0	0		2.7	0.0187	1	1	0
204507_s_at	PPP3R1	5534	protein phosphatase 3 (formerly 2B), regulatory subunit B, 19kDa, alpha isoform (calcineurin B, type I)	50	51	45	48.8	50	28	66	45.1	47	52	59	52.2	102	159	146	133.6		-1.08	1	1.1	0.9492	0	0	0		2.7	0.0626	1	1	0
219657_s_at	KLF3	51274	Kruppel-like factor 3 (basic)	57	47	56	53.3	50	54	48	50.6	55	47	54	52.1	144	140	152	145.4		-1.05	1	-1	0.9805	0	0	0		2.7	0.0146	1	1	0
202146_at	IFRD1	3475	interferon-related developmental regulator 1	160	138	154	150.5	144	122	166	142.7	146	190	181	171.2	319	465	463	409.7		-1.05	1	1.1	0.904	0	0	0		2.7	0.0564	1	1	0
222670_s_at	MAFB	9935	v-maf musculoaponeurotic fibrosarcoma oncogene homolog B (avian)	50	46	46	47.1	46	58	46	49.4	42	40	46	42.3	124	127	131	127.3		1.05	1	-1.1	0.854	0	0	0		2.7	0.0044	1	1	0
1553449_at	FLJ36701	283860	hypothetical protein FLJ36701	19	20	21	20.2	21	22	23	21.8	21	30	26	25.3	39	66	61	54.2		1.08	1	1.3	0.862	0	0	0		2.7	0.084	1	1	0
235258_at	DCP2	167227	DCP2 decapping enzyme homolog (S. cerevisiae)	24	25	22	23.4	21	23	25	23	31	26	25	27.2	60	67	61	62.8		-1.02	1	1.2	0.862	0	0	0		2.7	0.0115	1	1	0
201965_s_at	ALS4	23064	amyotrophic lateral sclerosis 4	91	93	87	90.3	99	74	100	90.1	99	95	84	92.7	261	217	251	242.4		-1	1	1	0.9704	0	0	0		2.7	0.0129	1	1	0
227749_at			Transcribed locus	31	25	27	27.4	27	26	24	26	27	28	30	28.5	77	81	63	73.1		-1.05	1	1	0.9728	0	0	0		2.7	0.0362	1	1	0
216017_s_at	NAB2	4665	NGFI-A binding protein 2 (EGR1 binding protein 2)	29	24	32	28.1	28	25	28	27.1	31	30	32	31.2	73	64	90	74.8		-1.04	1	1.1	0.9204	0	0	0		2.7	0.0587	1	1	0
213281_at				24	20	21	21.6	20	18	20	19.4	21	20	23	21	57	51	66	57.6		-1.12	1	-1	0.9774	0	0	0		2.7	0.0288	1	1	0
201878_at	ARIH1	25820	ariadne homolog, ubiquitin-conjugating enzyme E2 binding protein, 1 (Drosophila)	78	83	94	84.9	68	70	90	75.1	90	97	97	94.6	191	240	252	225.7		-1.13	1	1.1	0.8814	0	0	0		2.7	0.0355	1	1	0
202702_at	TRIM26	7726	tripartite motif-containing 26	98	106	111	105	114	105	108	108.9	110	122	118	116.7	268	287	281	278.4		1.04	1	1.1	0.8466	0	0	0		2.7	0.0073	1	1	0
227013_at	LATS2	26524	LATS, large tumor suppressor, homolog 2 (Drosophila)	136	154	156	148.5	127	111	156	130.1	195	184	175	184.3	411	382	388	393.5		-1.14	1	1.2	0.6632	0	0	0		2.6	0.0095	1	1	0
220349_s_at	FLJ21865	64772	endo-beta-N-acetylglucosaminidase	72	79	76	75.5	76	68	78	73.8	103	90	83	91.6	189	194	216	199.6		-1.02	1	1.2	0.7847	0	0	0		2.6	0.0095	1	1	0
1552329_at	RBBP6	5930	retinoblastoma binding protein 6	24	25	24	24.4	25	18	27	23.3	22	31	26	26.3	47	77	75	64.5		-1.05	1	1.1	0.9595	0	0	0		2.6	0.085	1	1	0
206907_at	TNFSF9	8744	tumor necrosis factor (ligand) superfamily, member 9	32	42	39	37.7	43	35	46	41	37	39	45	40.3	85	101	114	99.2		1.09	1	1.1	0.9614	0	0	0		2.6	0.0497	1	1	0
208786_s_at	MAP1LC3B	81631	microtubule-associated protein 1 light chain 3 beta	317	330	320	322.6	344	311	356	336.5	352	339	356	349	788	880	882	848.9		1.04	1	1.1	0.6374	0	0	0		2.6	0.0061	1	1	0
41386_i_at	JMJD3	23135	jumonji domain containing 3	95	89	95	93	84	77	85	81.5	89	87	93	89.7	237	239	257	244		-1.14	1	-1	0.9168	0	0	0		2.6	0.0044	1	1	0
1554628_at	LOC126295	126295	hypothetical protein LOC126295	30	37	29	31.7	31	24	39	30.7	36	44	32	37	74	89	87	82.9		-1.03	1	1.2	0.9138	0	0	0		2.6	0.0335	1	1	0
204181_s_at	ZNF297B	23099	zinc finger protein 297B	61	78	71	69.4	72	51	80	66.4	90	70	78	78.8	177	170	200	181.7		-1.05	1	1.1	0.9178	0	0	0		2.6	0.0274	1	1	0
203751_x_at	JUND	3727	jun D proto-oncogene	27	27	28	27.1	27	28	27	27.5	28	29	21	26.1	60	70	85	70.9		1.01	1	-1	0.9787	0	0	0		2.6	0.0364	1	1	0
221290_s_at	MUM1	84939	melanoma associated antigen (mutated) 1	45	56	54	51.6	51	54	62	55.6	69	68	63	66.6	119	130	159	134.9		1.08	1	1.3	0.7095	0	0	0		2.6	0.0408	1	1	0
228234_at	TICAM2	353376	toll-like receptor adaptor molecule 2	62	75	79	71.7	71	72	74	72.2	60	60	71	63.6	169	187	206	186.5		1.01	1	-1.1	0.9138	0	0	0		2.6	0.0298	1	1	0
1560071_a_at				16	12	16	14.7	21	12	21	17.1	17	17	16	16.7	19	47	62	38.3		1.16	1	1.1	0.904	0	0	0		2.6	0.3281	0	0	0
208708_x_at	EIF5	1983	eukaryotic translation initiation factor 5	560	598	562	573	550	515	616	558.5	604	626	607	612.2	1458	1517	1492	1488.7		-1.03	1	1.1	0.7963	0	0	0		2.6	0.0026	1	1	0
201625_s_at	INSIG1	3638	insulin induced gene 1	66	69	72	68.9	61	54	67	60.5	66	83	77	74.7	152	179	208	178.6		-1.14	1	1.1	0.9285	0	0	0		2.6	0.0314	1	1	0
214714_at	ZNF394	84124	zinc finger protein 394	82	99	91	90.4	81	68	107	83.7	99	95	91	94.9	237	233	229	233		-1.08	1	1	0.952	0	0	0		2.6	0.012	1	1	0
222449_at	TMEPAI	56937	transmembrane, prostate androgen induced RNA	195	209	222	208.5	215	210	232	218.5	235	228	253	238.9	540	500	575	537.1		1.05	1	1.1	0.791	0	0	0		2.6	0.0121	1	1	0
211761_s_at	CACYBP	27101	calcyclin binding protein /// calcyclin binding protein	634	646	638	639.4	617	613	662	629.9	832	870	786	828.8	1675	1552	1712	1644.6		-1.02	1	1.3	0.3815	0	0	0		2.6	0.004	1	1	0
219340_s_at	CLN8	2055	ceroid-lipofuscinosis, neuronal 8 (epilepsy, progressive with mental retardation)	42	42	43	42.2	40	31	41	37.2	41	49	43	44.2	90	124	114	108.3		-1.13	1	1	0.9458	0	0	0		2.6	0.0333	1	1	0
203499_at	EPHA2	1969	EPH receptor A2	139	144	140	141	138	121	158	138	152	162	170	161.3	352	349	384	361.3		-1.02	1	1.1	0.6769	0	0	0		2.6	0.0043	1	1	0
1568954_s_at	PRO0149	29035	PRO0149 protein	97	94	97	96.1	85	61	94	78.7	77	93	90	86.1	212	254	276	246.1		-1.22	1	-1.1	0.8741	0	0	0		2.6	0.0229	1	1	0
204094_s_at	TSC22D2	9819	TSC22 domain family, member 2	135	144	167	148	145	117	162	139.9	139	166	163	155.2	275	438	447	377.8		-1.06	1	1	0.968	0	0	0		2.6	0.0989	1	1	0
205263_at	BCL10	8915	B-cell CLL/lymphoma 10	151	151	163	154.6	169	138	163	156	158	169	152	159.6	330	458	403	393.6		1.01	1	1	0.9542	0	0	0		2.5	0.0364	1	1	0
209481_at	SNRK	54861	SNF related kinase	98	102	101	100.5	96	76	108	92.4	97	115	114	108.2	222	279	270	255.7		-1.09	1	1.1	0.9163	0	0	0		2.5	0.0203	1	1	0
222815_at	RNF12	51132	ring finger protein 12	40	45	53	45.6	44	33	49	41.7	44	52	47	47.5	96	117	138	115.9		-1.1	1	1	0.9769	0	0	0		2.5	0.064	1	1	0
219500_at	CLCF1	23529	cardiotrophin-like cytokine factor 1	103	117	103	107.4	105	122	100	108.7	113	106	99	106.2	299	266	253	272		1.01	1	-1	0.9882	0	0	0		2.5	0.0179	1	1	0
210999_s_at	GRB10	2887	growth factor receptor-bound protein 10	70	74	78	73.8	75	82	84	80	81	83	80	81.7	187	194	180	186.8		1.08	1	1.1	0.7823	0	0	0		2.5	0.0067	1	1	0
203984_s_at	CASP9	842	caspase 9, apoptosis-related cysteine peptidase	106	136	128	122.5	98	99	133	109.2	113	115	121	116.6	288	327	316	309.9		-1.12	1	-1.1	0.9631	0	0	0		2.5	0.0267	1	1	0
210775_x_at	CASP9	842	caspase 9, apoptosis-related cysteine peptidase	64	57	53	57.8	60	44	60	54.2	60	60	58	59.1	146	145	147	146.1		-1.07	1	1	0.9774	0	0	0		2.5	0.0127	1	1	0
226206_at	MAFK	7975	v-maf musculoaponeurotic fibrosarcoma oncogene homolog K (avian)	312	340	337	329.6	289	263	344	296.7	508	428	441	457.7	883	759	856	830.5		-1.11	1	1.4	0.5313	0	0	0		2.5	0.012	1	1	0
1555832_s_at	KLF6	1316	Kruppel-like factor 6	205	207	215	209	186	163	203	183	142	174	170	161.4	508	534	537	526.2		-1.14	1	-1.3	0.6814	0	0	0		2.5	0.0025	1	1	0
200881_s_at	DNAJA1	3301	DnaJ (Hsp40) homolog, subfamily A, member 1	1654	1621	1681	1651.4	1524	1566	1663	1583.3	2600	2520	2513	2543.7	4131	4110	4169	4136.9		-1.04	1	1.5	0.0409	1	1	0		2.5	0.001	1	1	0
208290_s_at	EIF5	1983	eukaryotic translation initiation factor 5	328	360	321	335.6	317	297	341	317.9	353	372	354	359.5	813	827	870	836.6		-1.06	1	1.1	0.8814	0	0	0		2.5	0.0073	1	1	0
243372_at	HSPD1	3329	heat shock 60kDa protein 1 (chaperonin)	46	50	43	46.4	47	33	45	41.3	46	49	47	47.4	86	131	136	115.2		-1.12	1	1	0.9747	0	0	0		2.5	0.0882	1	1	0
213341_at	FEM1C	56929	fem-1 homolog c (C.elegans)	73	71	61	68.1	78	49	74	65.7	59	81	71	69.6	155	169	183	168.9		-1.04	1	1	0.9876	0	0	0		2.5	0.0216	1	1	0
205765_at	CYP3A5	1577	cytochrome P450, family 3, subfamily A, polypeptide 5	34	35	35	34.5	37	29	40	35.2	32	33	34	32.9	62	91	110	85.4		1.02	1	-1	0.8556	0	0	0		2.5	0.1011	1	1	0
201324_at	EMP1	2012	epithelial membrane protein 1	70	75	73	72.7	63	47	67	58.4	62	78	71	70.2	135	208	207	180		-1.25	1	-1	0.9692	0	0	0		2.5	0.0786	1	1	0
204203_at	CEBPG	1054	CCAAT/enhancer binding protein (C/EBP), gamma	166	172	173	170.1	152	131	186	154.7	162	166	176	167.9	389	421	455	420.8		-1.1	1	-1	0.9752	0	0	0		2.5	0.0099	1	1	0
218878_s_at	SIRT1	23411	sirtuin (silent mating type information regulation 2 homolog) 1 (S. cerevisiae)	222	233	240	231.5	247	178	234	217.5	200	245	228	223.7	494	628	602	571.5		-1.06	1	-1	0.9687	0	0	0		2.5	0.0244	1	1	0
226099_at	ELL2	22936	elongation factor, RNA polymerase II, 2	185	176	190	183.4	194	131	180	166.2	205	254	224	227	386	487	492	452.1		-1.1	1	1.2	0.7499	0	0	0		2.5	0.0274	1	1	0
235661_at			Transcribed locus	19	18	17	18.3	16	25	19	19.8	21	18	21	20	37	42	59	45		1.08	1	1.1	0.9033	0	0	0		2.5	0.0819	1	1	0
214684_at	MEF2A	4205	MADS box transcription enhancer factor 2, polypeptide A (myocyte enhancer factor 2A)	99	110	98	102.3	103	91	112	101.5	104	105	97	102	191	282	291	250.3		-1.01	1	-1	0.9952	0	0	0		2.4	0.0764	1	1	0
239155_at	CXADR	1525	Coxsackie virus and adenovirus receptor	30	37	36	34.2	34	25	41	32.7	31	35	37	34.1	57	103	100	83.6		-1.05	1	-1	0.9982	0	0	0		2.4	0.1437	1	1	0
1555788_a_at	TRIB3	57761	tribbles homolog 3 (Drosophila)	67	62	54	60.7	67	69	67	67.8	72	82	77	76.7	142	154	148	148		1.12	1	1.3	0.7373	0	0	0		2.4	0.0174	1	1	0
206877_at	MXD1	4084	MAX dimerization protein 1	18	19	20	18.8	19	21	18	19	19	19	18	19	45	41	52	45.9		1.01	1	1	0.9796	0	0	0		2.4	0.0225	1	1	0
221985_at	KLHL24	54800	kelch-like 24 (Drosophila)	53	56	63	57.2	47	44	65	51.5	49	56	44	49.6	118	143	161	139.4		-1.11	1	-1.2	0.8885	0	0	0		2.4	0.0431	1	1	0
227044_at			Full-length cDNA clone CS0DI009YA14 of Placenta Cot 25-normalized of Homo sapiens (human)	38	56	58	49.9	50	44	51	48.1	55	51	63	56.2	107	117	143	121.4		-1.04	1	1.1	0.9534	0	0	0		2.4	0.0954	1	1	0
214326_x_at	JUND	3727	jun D proto-oncogene	19	23	19	20.3	21	26	21	22.9	20	20	25	21.6	44	45	60	49.5		1.13	1	1.1	0.9666	0	0	0		2.4	0.0574	1	1	0
216985_s_at	STX3A	6809	syntaxin 3A	19	21	22	20.7	17	20	19	18.8	22	19	27	22.7	39	52	62	50.3		-1.1	1	1.1	0.9536	0	0	0		2.4	0.0804	1	1	0
227481_at	CNKSR3	154043	CNKSR family member 3	51	51	58	53.4	69	29	57	48.8	93	95	94	94.2	120	133	135	129.6		-1.09	1	1.8	0.2347	0	0	0		2.4	0.0138	1	1	0
225955_at	METRNL	284207	meteorin, glial cell differentiation regulator-like	41	53	55	49.2	52	52	48	50.3	48	51	52	50.3	105	124	131	119.4		1.02	1	1	0.9869	0	0	0		2.4	0.0516	1	1	0
224979_s_at	USP36	57602	ubiquitin specific peptidase 36	49	54	51	51.6	42	67	50	51.9	52	46	47	48.3	130	124	121	125		1.01	1	-1.1	0.9108	0	0	0		2.4	0.0062	1	1	0
206742_at	FIGF	2277	c-fos induced growth factor (vascular endothelial growth factor D)	20	20	19	19.5	20	20	20	20	22	20	23	21.6	39	49	55	47.3		1.02	1	1.1	0.791	0	0	0		2.4	0.0453	1	1	0
210056_at	RND1	27289	Rho family GTPase 1	148	137	143	142.8	126	106	139	122.9	101	108	115	108.1	318	344	376	345.1		-1.16	1	-1.3	0.4625	0	0	0		2.4	0.0129	1	1	0
224673_at	LENG8	114823	leukocyte receptor cluster (LRC) member 8	44	40	42	41.9	41	32	43	38.2	49	45	40	44.6	87	90	131	101.1		-1.1	1	1.1	0.9361	0	0	0		2.4	0.0722	1	1	0
243487_at	AFF4	27125	AF4/FMR2 family, member 4	20	17	18	18.3	19	17	20	18.8	21	18	20	19.4	38	45	50	44.1		1.02	1	1.1	0.9255	0	0	0		2.4	0.0315	1	1	0
219677_at	SPSB1	80176	splA/ryanodine receptor domain and SOCS box containing 1	52	53	62	55.6	57	51	55	54.5	51	56	51	52.6	134	138	129	133.9		-1.02	1	-1.1	0.9518	0	0	0		2.4	0.0163	1	1	0
218145_at	TRIB3	57761	tribbles homolog 3 (Drosophila)	295	348	314	318.1	300	275	327	300.2	346	342	327	338.4	764	763	766	764.5		-1.06	1	1.1	0.9217	0	0	0		2.4	0.0115	1	1	0
204157_s_at	KIAA0999	23387	KIAA0999 protein	56	67	57	59.5	61	49	69	58.9	58	72	64	64.4	117	154	162	142.8		-1.01	1	1.1	0.9451	0	0	0		2.4	0.0572	1	1	0
231714_s_at	AP4B1	10717	adaptor-related protein complex 4, beta 1 subunit	55	60	62	58.8	57	39	63	52	61	65	61	62.4	134	139	149	140.9		-1.13	1	1.1	0.9066	0	0	0		2.4	0.0115	1	1	0
231009_at	PLA2G12B	84647	phospholipase A2, group XIIB	18	19	20	19	23	25	21	22.8	20	21	20	20.5	35	43	62	45.3		1.2	1	1.1	0.8613	0	0	0		2.4	0.1117	1	1	0
231779_at	IRAK2	3656	interleukin-1 receptor-associated kinase 2	52	53	57	54.2	64	46	64	57.4	61	61	63	61.7	107	139	146	129.4		1.06	1	1.1	0.6338	0	0	0		2.4	0.0448	1	1	0
218647_s_at	YRDC	79693	yrdC domain containing (E.coli)	116	121	129	121.7	115	81	120	103.7	109	126	112	115.4	244	304	329	290		-1.17	1	-1.1	0.9388	0	0	0		2.4	0.0386	1	1	0
209652_s_at	PGF	5228	placental growth factor, vascular endothelial growth factor-related protein	25	29	30	27.7	28	36	25	29.4	28	29	25	27.5	61	59	79	65.9		1.06	1	-1	0.9935	0	0	0		2.4	0.0479	1	1	0
202668_at	EFNB2	1948	ephrin-B2	33	30	31	31.5	27	22	25	24.4	32	35	28	31.3	54	79	99	75		-1.29	1	-1	0.9935	0	0	0		2.4	0.1219	1	1	0
210189_at	HSPA1L	3305	heat shock 70kDa protein 1-like	27	29	30	28.8	30	23	28	27	29	30	28	29.1	65	70	70	68.3		-1.07	1	1	0.9838	0	0	0		2.4	0.0094	1	1	0
205463_s_at	PDGFA	5154	platelet-derived growth factor alpha polypeptide	83	80	83	81.8	68	64	74	68.5	78	87	76	80.3	214	189	180	193.8		-1.19	1	-1	0.9708	0	0	0		2.4	0.0129	1	1	0
244811_at	IRAK1BP1	134728	Interleukin-1 receptor-associated kinase 1 binding protein 1	44	50	48	47.7	46	33	49	42.1	46	45	49	46.8	87	126	132	112.9		-1.13	1	-1	0.9774	0	0	0		2.4	0.0778	1	1	0
201881_s_at	ARIH1	25820	ariadne homolog, ubiquitin-conjugating enzyme E2 binding protein, 1 (Drosophila)	146	159	164	156.2	162	118	163	146.2	157	174	166	165.4	360	375	372	369.2		-1.07	1	1.1	0.9171	0	0	0		2.4	0.0065	1	1	0
221954_at	C20orf111	51526	Chromosome 20 open reading frame 111	99	106	101	101.7	115	80	107	99.4	107	104	102	104.3	208	237	281	240.4		-1.02	1	1	0.9401	0	0	0		2.4	0.0362	1	1	0
209808_x_at	ING1	3621	inhibitor of growth family, member 1	56	62	55	57.5	62	70	60	63.9	61	57	59	58.9	129	147	132	135.8		1.11	1	1	0.9701	0	0	0		2.4	0.0166	1	1	0
226913_s_at	SOX8	30812	SRY (sex determining region Y)-box 8	21	18	17	18.6	20	24	20	21	19	21	20	19.9	42	41	49	44		1.13	1	1.1	0.9414	0	0	0		2.4	0.0315	1	1	0
221200_at				15	14	16	15.2	17	20	16	17.3	15	17	17	16.2	28	46	36	35.8		1.14	1	1.1	0.904	0	0	0		2.4	0.0902	1	1	0
212458_at	SPRED2	200734	sprouty-related, EVH1 domain containing 2	166	204	205	190.6	195	158	214	187.4	227	254	263	247.6	378	474	501	447.9		-1.02	1	1.3	0.7612	0	0	0		2.3	0.0549	1	1	0
232773_at	MGC13057	84281	Hypothetical protein MGC13057	21	16	22	19.3	19	21	22	20.8	18	17	17	17.6	32	47	63	45.2		1.08	1	-1.1	0.9404	0	0	0		2.3	0.1743	0	0	0
201846_s_at	RYBP	23429	RING1 and YY1 binding protein	282	299	300	293.8	281	301	335	304.9	327	322	331	326.4	692	643	729	687.5		1.04	1	1.1	0.5724	0	0	0		2.3	0.0089	1	1	0
208960_s_at	KLF6	1316	Kruppel-like factor 6	78	89	75	80.3	73	84	84	80.2	68	67	71	68.7	168	186	211	187.5		-1	1	-1.2	0.7852	0	0	0		2.3	0.0329	1	1	0
224739_at	PIM3	415116	pim-3 oncogene	210	214	207	210.3	198	180	207	194.7	202	198	205	201.8	465	500	509	490.7		-1.08	1	-1	0.7631	0	0	0		2.3	0.0043	1	1	0
212665_at	TIPARP	25976	TCDD-inducible poly(ADP-ribose) polymerase	197	193	212	200.7	198	193	223	204.2	206	218	192	205.2	425	484	498	467.9		1.02	1	1	0.9726	0	0	0		2.3	0.0163	1	1	0
224919_at	MRPS6	64968	mitochondrial ribosomal protein S6	253	260	264	259.2	264	229	289	259.4	286	298	304	296.1	598	594	622	604.2		1	1	1.1	0.496	0	0	0		2.3	0.0019	1	1	0
219480_at	SNAI1	6615	snail homolog 1 (Drosophila)	42	45	47	44.7	49	41	47	45.5	38	36	39	37.9	118	108	88	103.7		1.02	1	-1.2	0.6263	0	0	0		2.3	0.0409	1	1	0
203574_at	NFIL3	4783	nuclear factor, interleukin 3 regulated	102	106	117	108.1	113	87	128	108	106	119	110	111.8	247	257	250	251		-1	1	1	0.9637	0	0	0		2.3	0.0095	1	1	0
204180_s_at	ZNF297B	23099	zinc finger protein 297B	54	43	53	49.8	48	43	54	48.3	43	48	45	44.9	110	111	127	115.5		-1.03	1	-1.1	0.9066	0	0	0		2.3	0.0326	1	1	0
223296_at	MGC4399	84275	mitochondrial carrier protein	102	121	119	113.6	100	77	117	96.7	85	107	112	101	240	269	281	263		-1.18	1	-1.1	0.9231	0	0	0		2.3	0.0241	1	1	0
223852_s_at	STK40	83931	serine/threonine kinase 40	41	53	48	47.2	42	65	48	51	47	57	55	52.7	112	105	110	109.1		1.08	1	1.1	0.9209	0	0	0		2.3	0.0278	1	1	0
209626_s_at	OSBPL3	26031	oxysterol binding protein-like 3	49	53	53	51.4	53	44	51	49	49	62	59	56.5	99	129	132	118.8		-1.05	1	1.1	0.9168	0	0	0		2.3	0.0446	1	1	0
210512_s_at	VEGF	7422	vascular endothelial growth factor	175	175	168	172.7	180	124	176	157.9	191	190	198	193	334	441	430	398.6		-1.09	1	1.1	0.5037	0	0	0		2.3	0.0378	1	1	0
218810_at	ZC3H12A	80149	zinc finger CCCH-type containing 12A	65	68	65	66.1	71	67	64	67.4	65	65	68	66.3	118	179	167	152.4		1.02	1	1	0.9927	0	0	0		2.3	0.0756	1	1	0
222747_s_at	SCML1	6322	sex comb on midleg-like 1 (Drosophila)	38	49	39	41.6	51	41	49	46.6	57	62	57	58.7	74	93	128	95.9		1.12	1	1.4	0.6401	0	0	0		2.3	0.1261	1	1	0
205286_at	TFAP2C	7022	transcription factor AP-2 gamma (activating enhancer binding protein 2 gamma)	160	147	158	155	165	146	144	151.4	142	163	157	153.8	364	357	349	356.7		-1.02	1	-1	0.9906	0	0	0		2.3	0.0043	1	1	0
227613_at	ZNF331	55422	zinc finger protein 331	66	75	69	70	72	61	66	66.2	88	74	84	81.6	138	170	177	160.9		-1.06	1	1.2	0.8318	0	0	0		2.3	0.034	1	1	0
214741_at	ZNF131	7690	zinc finger protein 131 (clone pHZ-10)	74	74	75	74.4	70	52	88	68.2	80	86	94	86.7	135	182	203	170.9		-1.09	1	1.2	0.7548	0	0	0		2.3	0.0668	1	1	0
226333_at	IL6R	3570	interleukin 6 receptor	72	73	71	71.9	80	54	74	68.4	55	73	68	64.8	154	166	176	165		-1.05	1	-1.1	0.9218	0	0	0		2.3	0.0082	1	1	0
225183_at	PRO0149	29035	PRO0149 protein	317	319	332	322.2	326	304	344	324.3	304	318	328	316.5	701	755	762	738.9		1.01	1	-1	0.9614	0	0	0		2.3	0.0047	1	1	0
202794_at	INPP1	3628	inositol polyphosphate-1-phosphatase	98	109	121	108.8	104	101	115	106.5	103	119	107	109.4	247	260	241	249.3		-1.02	1	1	0.9948	0	0	0		2.3	0.0193	1	1	0
217173_s_at	LDLR	3949	low density lipoprotein receptor (familial hypercholesterolemia)	67	47	58	56.9	71	71	51	63.4	60	51	59	56.9	134	115	143	130.2		1.11	1	1	0.9998	0	0	0		2.3	0.068	1	1	0
1552664_at	FLCN	201163	folliculin	92	69	84	80.8	81	57	86	73.8	67	98	74	78.7	144	231	189	184.8		-1.09	1	-1	0.989	0	0	0		2.3	0.1098	1	1	0
200797_s_at	MCL1	4170	myeloid cell leukemia sequence 1 (BCL2-related)	419	481	487	461.3	431	487	513	475.7	588	606	561	584.5	930	1073	1173	1053.9		1.03	1	1.3	0.6039	0	0	0		2.3	0.0332	1	1	0
224978_s_at	USP36	57602	ubiquitin specific peptidase 36	66	70	66	67	65	49	64	58.9	77	67	67	70.2	151	149	158	152.6		-1.14	1	1	0.9445	0	0	0		2.3	0.004	1	1	0
202924_s_at	PLAGL2	5326	pleiomorphic adenoma gene-like 2	38	40	38	38.6	33	34	44	36.7	28	38	42	35.4	69	90	110	88.1		-1.05	1	-1.1	0.9614	0	0	0		2.3	0.0831	1	1	0
206724_at	CBX4	8535	chromobox homolog 4 (Pc class homolog, Drosophila)	44	48	45	45.7	46	62	45	50.6	44	51	49	47.6	92	101	121	104.1		1.11	1	1	0.9536	0	0	0		2.3	0.0358	1	1	0
223584_s_at	KBTBD2	25948	kelch repeat and BTB (POZ) domain containing 2	54	66	62	60.7	62	52	65	59.7	54	55	58	55.5	105	164	153	138		-1.02	1	-1.1	0.9028	0	0	0		2.3	0.1003	1	1	0
228587_at	SLC5A10	125206	Solute carrier family 5 (sodium/glucose cotransporter), member 10	64	71	71	68.4	68	64	74	68.6	63	66	65	64.8	169	140	156	154.5		1	1	-1.1	0.8926	0	0	0		2.3	0.021	1	1	0
224725_at	MIB1	57534	mindbomb homolog 1 (Drosophila)	85	76	78	79.7	70	57	90	71.4	72	78	74	74.8	133	216	201	179.6		-1.12	1	-1.1	0.9033	0	0	0		2.3	0.1064	1	1	0
232035_at	HIST1H4H	8365	histone 1, H4h	35	37	29	33.5	37	26	33	31.5	37	29	36	33.8	57	88	86	75.3		-1.06	1	1	0.9927	0	0	0		2.3	0.108	1	1	0
223939_at	SUCNR1	56670	succinate receptor 1	38	41	41	40	40	28	48	37.6	35	40	36	36.8	74	92	108	89.9		-1.06	1	-1.1	0.8949	0	0	0		2.2	0.0609	1	1	0
212724_at	RND3	390	Rho family GTPase 3	503	496	473	490.4	507	422	484	469.5	637	598	591	608.2	1102	1081	1110	1097.6		-1.04	1	1.2	0.4387	0	0	0		2.2	0.0024	1	1	0
232273_at	RBM21	64852	RNA binding motif protein 21	24	24	22	23.2	23	19	21	20.7	23	22	24	23	39	56	63	51.9		-1.12	1	-1	0.9838	0	0	0		2.2	0.0966	1	1	0
214234_s_at	CYP3A5	1577	cytochrome P450, family 3, subfamily A, polypeptide 5	66	56	59	60.1	66	63	68	65.6	57	60	57	57.6	125	136	142	134.3		1.09	1	-1	0.9542	0	0	0		2.2	0.0202	1	1	0
220235_s_at	C1orf103	55791	chromosome 1 open reading frame 103	114	125	125	121.1	118	67	122	98.5	121	125	142	128.8	196	320	315	270.1		-1.23	1	1.1	0.9335	0	0	0		2.2	0.1208	1	1	0
227755_at			CDNA FLJ42435 fis, clone BLADE2006849	68	75	74	71.9	76	63	82	73	70	77	74	73.6	133	173	179	159.9		1.01	1	1	0.966	0	0	0		2.2	0.0498	1	1	0
202071_at	SDC4	6385	syndecan 4 (amphiglycan, ryudocan)	164	173	172	169.8	177	174	167	172.6	164	173	185	173.7	384	360	388	376.9		1.02	1	1	0.9673	0	0	0		2.2	0.0047	1	1	0
233952_s_at	ZNF295	49854	zinc finger protein 295	162	203	174	178.5	156	127	190	155.7	270	268	236	257.7	388	383	418	396		-1.15	1	1.4	0.5873	0	0	0		2.2	0.0267	1	1	0
225140_at	KLF3	51274	Kruppel-like factor 3 (basic)	38	39	40	38.8	34	28	41	34.1	35	40	35	36.4	56	107	106	86.1		-1.14	1	-1.1	0.9138	0	0	0		2.2	0.1881	0	0	0
208705_s_at	EIF5	1983	eukaryotic translation initiation factor 5	1283	1282	1267	1277.5	1292	1272	1368	1309.8	1514	1447	1375	1444.3	2943	2723	2838	2833.1		1.03	1	1.1	0.6087	0	0	0		2.2	0.0032	1	1	0
218192_at	IHPK2	51447	inositol hexaphosphate kinase 2	88	91	89	89.3	86	87	90	87.6	84	84	86	84.9	191	191	212	197.9		-1.02	1	-1.1	0.7181	0	0	0		2.2	0.0078	1	1	0
221842_s_at	ZNF131	7690	zinc finger protein 131 (clone pHZ-10)	156	162	170	162.4	180	133	179	162.2	196	216	204	205.2	316	370	397	359.5		-1	1	1.3	0.4776	0	0	0		2.2	0.0267	1	1	0
221308_at	FRS2	10818	fibroblast growth factor receptor substrate 2	24	27	24	25	26	31	26	27.9	25	25	22	23.7	56	55	56	55.4		1.11	1	-1.1	0.9361	0	0	0		2.2	0.0095	1	1	0
209339_at	SIAH2	6478	seven in absentia homolog 2 (Drosophila) /// seven in absentia homolog 2 (Drosophila)	81	86	93	86.4	71	73	86	76.1	95	87	95	92.5	172	200	202	190.8		-1.14	1	1.1	0.9117	0	0	0		2.2	0.0233	1	1	0
227561_at	DDR2	4921	Discoidin domain receptor family, member 2	26	20	22	22.6	25	15	19	19.4	22	22	21	21.5	48	54	47	49.8		-1.16	1	-1	0.966	0	0	0		2.2	0.0426	1	1	0
210286_s_at	SLC4A7	9497	solute carrier family 4, sodium bicarbonate cotransporter, member 7	20	16	14	16.5	15	12	17	14.4	16	16	14	15.3	22	48	47	36.3		-1.14	1	-1.1	0.9618	0	0	0		2.2	0.2945	0	0	0
227521_at	FBXO33	254170	F-box protein 33	105	101	99	101.6	100	75	98	90.4	88	96	107	96.2	185	254	237	223.3		-1.12	1	-1.1	0.9451	0	0	0		2.2	0.0494	1	1	0
221260_s_at	C12orf22	81566	chromosome 12 open reading frame 22 /// chromosome 12 open reading frame 22	57	64	70	63.6	71	41	70	58.8	66	65	68	66.5	117	158	148	139.8		-1.08	1	1	0.957	0	0	0		2.2	0.061	1	1	0
202393_s_at	KLF10	7071	Kruppel-like factor 10	480	435	446	453.5	440	348	458	412.4	424	442	425	430.2	808	1108	1101	995.1		-1.1	1	-1.1	0.8926	0	0	0		2.2	0.0608	1	1	0
205047_s_at	ASNS	440	asparagine synthetase	217	235	239	230	227	204	246	225.2	257	261	276	264.2	486	517	509	503.9		-1.02	1	1.1	0.6901	0	0	0		2.2	0.0077	1	1	0
214965_at	MGC26885	124044	hypothetical protein MGC26885	98	118	131	114.7	106	119	110	111.4	106	98	120	107.5	242	259	253	251.2		-1.03	1	-1.1	0.9639	0	0	0		2.2	0.0405	1	1	0
1554717_a_at	PDE4D	5144	phosphodiesterase 4D, cAMP-specific (phosphodiesterase E3 dunce homolog, Drosophila)	81	80	90	83.5	102	63	106	87.7	91	87	86	88.1	161	185	204	182.6		1.05	1	1.1	0.909	0	0	0		2.2	0.0332	1	1	0
239377_at	MGC11102	84285	hypothetical protein MGC11102	140	150	153	147.9	143	119	143	134.5	148	140	136	141.3	332	319	317	323		-1.1	1	-1	0.9195	0	0	0		2.2	0.0055	1	1	0
228149_at	FLJ31818	154743	hypothetical protein FLJ31818	105	111	114	110.2	112	88	123	106.6	141	151	133	141.4	222	254	247	240.5		-1.03	1	1.3	0.5085	0	0	0		2.2	0.0128	1	1	0
235463_s_at	LASS6	253782	LAG1 longevity assurance homolog 6 (S. cerevisiae)	45	42	46	44.1	46	30	46	40.1	36	44	47	42.1	75	114	103	96		-1.1	1	-1	0.9687	0	0	0		2.2	0.0857	1	1	0
208961_s_at	KLF6	1316	Kruppel-like factor 6	127	130	128	128.2	117	127	139	127.6	94	106	111	103.4	266	265	308	278.8		-1	1	-1.2	0.605	0	0	0		2.2	0.0145	1	1	0
227034_at	C2orf26	65124	chromosome 2 open reading frame 26	75	78	79	77.1	82	51	81	69.5	71	81	78	76.5	158	162	182	167.3		-1.11	1	-1	0.9893	0	0	0		2.2	0.012	1	1	0
205178_s_at	RBBP6	5930	retinoblastoma binding protein 6	236	221	228	228.2	215	197	260	222.3	265	253	245	254	497	475	510	493.9		-1.03	1	1.1	0.7059	0	0	0		2.2	0.0048	1	1	0
224648_at	GPBP1	65056	GC-rich promoter binding protein 1	178	180	200	185.9	158	156	191	167.8	179	199	209	195.3	354	413	445	402		-1.11	1	1.1	0.9519	0	0	0		2.2	0.0334	1	1	0
212668_at	SMURF1	57154	SMAD specific E3 ubiquitin protein ligase 1	30	34	31	31.7	32	23	29	28	34	34	31	33.1	56	75	77	68.5		-1.13	1	1	0.9463	0	0	0		2.2	0.0617	1	1	0
1555274_a_at	SELI	85465	selenoprotein I	112	95	108	104.7	108	64	112	91.6	96	117	109	106.9	186	245	255	226.4		-1.14	1	1	0.9842	0	0	0		2.2	0.0658	1	1	0
228505_s_at	LOC124491	124491	LOC124491	42	44	49	45.1	48	35	46	42.7	50	43	45	45.7	86	107	101	97.3		-1.06	1	1	0.9869	0	0	0		2.2	0.0355	1	1	0
224058_s_at	LOC158160	158160	hypothetical protein LOC158160	16	17	20	17.6	20	17	20	18.9	19	22	21	20.6	22	50	50	38		1.08	1	1.2	0.867	0	0	0		2.2	0.3005	0	0	0
202720_at	TES	26136	testis derived transcript (3 LIM domains)	530	510	526	521.8	530	522	522	524.9	660	629	656	648.4	1095	1142	1136	1124.1		1.01	1	1.2	0.2797	0	0	0		2.2	0.002	1	1	0
224606_at	KLF6	1316	Kruppel-like factor 6	162	172	172	168.7	157	138	172	155.4	110	132	129	123.1	331	361	402	363.5		-1.09	1	-1.4	0.5488	0	0	0		2.2	0.0204	1	1	0
203004_s_at	MEF2D	4209	MADS box transcription enhancer factor 2, polypeptide D (myocyte enhancer factor 2D)	49	68	54	56.5	49	71	56	58.1	70	55	58	60.7	124	114	127	121.6		1.03	1	1.1	0.9674	0	0	0		2.2	0.0599	1	1	0
207630_s_at	CREM	1390	cAMP responsive element modulator	144	145	152	146.9	155	123	150	142	144	153	158	151.4	294	331	324	316.1		-1.03	1	1	0.9414	0	0	0		2.2	0.0106	1	1	0
204224_s_at	GCH1	2643	GTP cyclohydrolase 1 (dopa-responsive dystonia)	103	115	119	111.9	107	91	124	106.4	115	118	118	116.7	209	266	251	240.6		-1.05	1	1	0.9455	0	0	0		2.1	0.0405	1	1	0
208415_x_at	ING1	3621	inhibitor of growth family, member 1	135	127	125	129	124	101	127	117.1	130	125	128	127.5	286	259	288	277.3		-1.1	1	-1	0.974	0	0	0		2.1	0.0113	1	1	0
243141_at	MGC26963	166929	hypothetical protein MGC26963	38	36	37	36.9	36	33	36	35.2	42	39	38	39.6	80	73	84	79		-1.05	1	1.1	0.8741	0	0	0		2.1	0.013	1	1	0
212783_at	RBBP6	5930	retinoblastoma binding protein 6	189	169	193	183.5	179	165	196	179.7	200	223	204	209	337	387	458	390.9		-1.02	1	1.1	0.826	0	0	0		2.1	0.0547	1	1	0
224833_at	ETS1	2113	v-ets erythroblastosis virus E26 oncogene homolog 1 (avian)	79	83	85	82.2	79	64	79	73.5	90	99	88	92.4	154	176	195	174.4		-1.12	1	1.1	0.791	0	0	0		2.1	0.0293	1	1	0
221750_at	HMGCS1	3157	3-hydroxy-3-methylglutaryl-Coenzyme A synthase 1 (soluble)	123	106	110	112.8	103	90	107	100	100	111	116	109.1	200	260	263	239		-1.13	1	-1	0.969	0	0	0		2.1	0.0563	1	1	0
227347_x_at	HES4	57801	hairy and enhancer of split 4 (Drosophila)	74	103	87	87	75	116	94	93.7	73	91	100	86.9	179	176	199	184.3		1.08	1	-1	0.9993	0	0	0		2.1	0.0605	1	1	0
204182_s_at	ZNF297B	23099	zinc finger protein 297B	28	36	33	32.4	33	25	36	30.9	33	39	41	37.5	53	71	84	68.3		-1.05	1	1.2	0.9033	0	0	0		2.1	0.1205	1	1	0
205293_x_at	BAIAP2	10458	BAI1-associated protein 2	28	32	29	29.5	29	34	31	31.3	29	40	35	34.5	63	55	69	62.2		1.06	1	1.2	0.8926	0	0	0		2.1	0.0332	1	1	0
201490_s_at	PPIF	10105	peptidylprolyl isomerase F (cyclophilin F)	137	169	152	151.8	148	157	173	158.8	165	172	178	171.6	323	312	325	320.2		1.05	1	1.1	0.8702	0	0	0		2.1	0.0231	1	1	0
227697_at	SOCS3	9021	suppressor of cytokine signaling 3	55	61	54	56.5	49	45	53	49	55	64	56	58.3	90	110	170	118.9		-1.15	1	1	0.969	0	0	0		2.1	0.1782	0	0	0
225287_s_at	TMEM55B	90809	transmembrane protein 55B	100	110	105	104.8	98	89	110	98.8	109	112	106	109.1	234	207	222	220.4		-1.06	1	1	0.9138	0	0	0		2.1	0.0129	1	1	0
213497_at	ABTB2	25841	ankyrin repeat and BTB (POZ) domain containing 2	99	107	103	103	101	82	103	94.8	106	110	109	107.9	242	190	221	216.7		-1.09	1	1	0.8617	0	0	0		2.1	0.0331	1	1	0
238486_at	FRS2	10818	Fibroblast growth factor receptor substrate 2	44	41	50	45	43	33	38	38	37	44	46	42.1	81	103	101	94.6		-1.18	1	-1.1	0.953	0	0	0		2.1	0.0511	1	1	0
224492_s_at	ZNF627	199692	zinc finger protein 627 /// zinc finger protein 627	81	82	93	85	83	66	106	83.4	98	107	95	99.7	147	193	201	178.8		-1.02	1	1.2	0.791	0	0	0		2.1	0.0665	1	1	0
209355_s_at	PPAP2B	8613	phosphatidic acid phosphatase type 2B	113	126	136	124.8	140	101	158	130.9	204	194	219	205.3	238	255	294	261.3		1.05	1	1.6	0.4138	0	0	0		2.1	0.0395	1	1	0
219409_at	SNIP1	79753	Smad nuclear interacting protein 1	44	46	37	42	40	37	48	41.6	45	46	50	47	65	96	108	87.9		-1.01	1	1.1	0.9033	0	0	0		2.1	0.1429	1	1	0
212470_at	SPAG9	9043	sperm associated antigen 9	396	391	403	396.8	406	317	408	374.4	397	392	396	395.3	714	889	895	828		-1.06	1	-1	0.978	0	0	0		2.1	0.0342	1	1	0
227558_at	CBX4	8535	chromobox homolog 4 (Pc class homolog, Drosophila)	767	886	878	841.6	841	768	886	830.3	770	871	975	867.9	1561	1808	1905	1752		-1.01	1	1	0.978	0	0	0		2.1	0.0355	1	1	0
212286_at	ANKRD12	23253	ankyrin repeat domain 12	54	42	46	47	45	42	47	44.7	49	46	42	45.7	81	110	105	97.7		-1.05	1	-1	0.9799	0	0	0		2.1	0.0816	1	1	0
208180_s_at	HIST1H4H	8365	histone 1, H4h	25	22	21	22.5	19	20	24	20.9	20	22	24	21.7	37	50	55	46.6		-1.08	1	-1	0.9731	0	0	0		2.1	0.1003	1	1	0
210827_s_at	ELF3	1999	E74-like factor 3 (ets domain transcription factor, epithelial-specific )	617	681	629	641.8	678	653	676	668.9	664	587	639	629	1306	1313	1369	1329		1.04	1	-1	0.9761	0	0	0		2.1	0.0082	1	1	0
236402_at			CDNA FLJ42263 fis, clone TKIDN2014570	23	22	28	24.2	26	15	23	20.6	23	32	24	26.1	34	52	71	50.1		-1.17	1	1.1	0.966	0	0	0		2.1	0.2414	0	0	0
227200_at			Transcribed locus	177	164	175	171.9	161	149	180	162.9	162	175	176	170.9	264	383	444	355.6		-1.06	1	-1	0.9905	0	0	0		2.1	0.1319	1	1	0
208093_s_at	NDEL1	81565	nudE nuclear distribution gene E homolog like 1 (A. nidulans) /// nudE nuclear distribution gene E homolog like 1 (A. nidulans)	174	172	176	174.1	148	153	179	159.3	158	174	168	166.6	388	331	364	360		-1.09	1	-1	0.899	0	0	0		2.1	0.0146	1	1	0
225077_at	LOC283680	283680	hypothetical protein LOC283680	90	101	86	92	91	81	101	90.7	90	106	109	101.1	173	194	205	190.1		-1.01	1	1.1	0.9179	0	0	0		2.1	0.0298	1	1	0
1552580_at	FLJ25801	205860	hypothetical protein FLJ25801	25	27	26	26.1	25	30	27	27.3	32	33	38	34.2	49	50	64	53.9		1.05	1	1.3	0.6263	0	0	0		2.1	0.0493	1	1	0
222874_s_at	CLN8	2055	ceroid-lipofuscinosis, neuronal 8 (epilepsy, progressive with mental retardation)	48	53	46	48.8	34	41	41	38.7	41	36	49	41.7	88	110	106	100.8		-1.26	1	-1.2	0.8926	0	0	0		2.1	0.0414	1	1	0
205580_s_at	HRH1	3269	histamine receptor H1	31	28	35	31.2	37	32	35	34.6	40	32	30	33.8	69	61	63	64.3		1.11	1	1.1	0.9576	0	0	0		2.1	0.0378	1	1	0
211996_s_at	LOC23117 /// DKFZp547E087 /// LOC348162 /// LOC440354 /// LOC613037	23117 /// 283846 /// 348162 /// 440354 /// 613037	KIAA0220-like protein /// hypothetical gene LOC283846 /// hypothetical protein 348162 /// PI-3-kinase-related kinase SMG-1 pseudogene /// similar to the PI-3-kinase-related kinase SMG-1 family pseudogene 2	106	108	116	110	118	143	124	128	127	117	134	125.9	230	221	229	226.6		1.16	1	1.1	0.792	0	0	0		2.1	0.0065	1	1	0
223705_s_at	GPBP1	65056	GC-rich promoter binding protein 1	514	502	541	518.7	495	438	517	482.2	535	538	515	529.3	1036	1032	1131	1065.3		-1.08	1	1	0.9542	0	0	0		2.1	0.0099	1	1	0
31845_at	ELF4	2000	E74-like factor 4 (ets domain transcription factor)	145	158	152	151.9	143	136	167	148.5	137	154	156	149	299	311	324	311.1		-1.02	1	-1	0.9771	0	0	0		2	0.0087	1	1	0
203490_at	ELF4	2000	E74-like factor 4 (ets domain transcription factor)	114	118	119	116.8	102	109	136	114.8	124	122	113	119.5	227	242	249	239.1		-1.02	1	1	0.9576	0	0	0		2	0.0066	1	1	0
206247_at	MICB	4277	MHC class I polypeptide-related sequence B	70	68	68	68.5	60	51	68	59.4	83	87	81	83.7	99	157	178	140.2		-1.15	1	1.2	0.3277	0	0	0		2	0.1665	0	0	0
210002_at	GATA6	2627	GATA binding protein 6	68	79	78	74.7	85	42	73	63.8	83	109	103	97.7	117	176	174	152.7		-1.17	1	1.3	0.791	0	0	0		2	0.1163	1	1	0
204079_at	TPST2	8459	tyrosylprotein sulfotransferase 2	55	57	70	60.2	63	49	67	58.9	52	66	69	62	97	131	146	123.1		-1.02	1	1	0.9842	0	0	0		2	0.1141	1	1	0
210350_x_at	ING1	3621	inhibitor of growth family, member 1	28	31	27	28.7	26	26	26	25.8	24	27	28	26.4	58	54	64	58.7		-1.11	1	-1.1	0.904	0	0	0		2	0.025	1	1	0
237654_at	C14orf50	145376	chromosome 14 open reading frame 50	36	35	41	37.3	33	35	39	35.4	45	34	43	40.3	65	88	77	76.3		-1.05	1	1.1	0.9549	0	0	0		2	0.0583	1	1	0
201703_s_at	PPP1R10	5514	protein phosphatase 1, regulatory subunit 10	112	118	114	114.6	131	113	133	125.1	123	130	155	135.3	222	225	256	234		1.09	1	1.2	0.833	0	0	0		2	0.0159	1	1	0
230294_at			Transcribed locus	52	67	66	61.3	57	51	73	59.9	64	66	63	64.1	116	129	131	125.1		-1.02	1	1	0.9687	0	0	0		2	0.0516	1	1	0
204190_at	C13orf22	10208	chromosome 13 open reading frame 22	95	106	108	102.8	101	90	103	98.1	104	106	107	105.5	196	216	218	209.8		-1.05	1	1	0.9639	0	0	0		2	0.019	1	1	0
226640_at	LOC221955	221955	KCCR13L	35	43	47	41.2	41	37	43	40.3	49	50	47	48.4	81	83	89	83.9		-1.02	1	1.2	0.8772	0	0	0		2	0.0541	1	1	0
238595_at			Transcribed locus	38	30	33	33.4	28	28	33	29.4	34	39	33	35.1	63	59	84	67.9		-1.13	1	1.1	0.966	0	0	0		2	0.1	1	1	0
219496_at	C2orf26	65124	chromosome 2 open reading frame 26	75	81	87	80.6	69	67	83	72.7	87	88	89	87.9	156	155	182	163.9		-1.11	1	1.1	0.8636	0	0	0		2	0.0296	1	1	0
204030_s_at	SCHIP1	29970	schwannomin interacting protein 1	109	116	112	112.3	114	80	117	102.3	121	137	129	128.8	207	252	228	228.4		-1.1	1	1.1	0.726	0	0	0		2	0.0231	1	1	0
209803_s_at	PHLDA2	7262	pleckstrin homology-like domain, family A, member 2	426	417	434	425.3	433	381	454	421.5	370	436	457	419.4	713	935	967	863.8		-1.01	1	-1	0.9871	0	0	0		2	0.0604	1	1	0
210837_s_at	PDE4D	5144	phosphodiesterase 4D, cAMP-specific (phosphodiesterase E3 dunce homolog, Drosophila)	39	37	35	36.9	40	25	36	32.9	34	40	40	37.7	54	85	92	74.9		-1.12	1	1	0.98	0	0	0		2	0.1572	0	0	0
207030_s_at	CSRP2	1466	cysteine and glycine-rich protein 2	227	228	238	231.3	229	192	239	218.9	279	311	295	294.9	453	490	462	468.1		-1.06	1	1.3	0.4497	0	0	0		2	0.0061	1	1	0
239266_at			Transcribed locus	41	37	38	38.7	36	33	40	36.1	39	41	39	39.7	66	83	87	78.1		-1.07	1	1	0.9607	0	0	0		2	0.0534	1	1	0
219128_at	FLJ20558	54980	hypothetical protein FLJ20558	63	66	63	63.9	67	46	74	61.3	68	69	74	69.9	117	137	133	128.8		-1.04	1	1.1	0.791	0	0	0		2	0.0178	1	1	0
201325_s_at	EMP1	2012	epithelial membrane protein 1	43	42	41	41.9	40	35	43	38.9	43	52	45	46.5	65	90	102	84.3		-1.08	1	1.1	0.8888	0	0	0		2	0.1081	1	1	0
215009_s_at			CDNA FLJ46752 fis, clone TRACH3023063	89	83	76	82.5	83	62	88	76.7	72	90	92	83.8	111	214	192	165.9		-1.08	1	1	0.9897	0	0	0		2	0.2284	0	0	0
226055_at	ARRDC2	27106	arrestin domain containing 2	86	89	96	90.2	89	80	88	85.4	83	86	98	88.9	168	175	204	181.4		-1.06	1	-1	0.9854	0	0	0		2	0.0303	1	1	0
226970_at	FBXO33	254170	F-box protein 33	61	66	73	66.5	57	47	70	57.4	57	66	61	61.3	98	144	168	133.3		-1.16	1	-1.1	0.9211	0	0	0		2	0.1595	0	0	0
217975_at	WBP5	51186	WW domain binding protein 5	737	693	770	732.8	805	689	755	748.5	928	999	948	957.8	1324	1616	1486	1470.3		1.02	1	1.3	0.4497	0	0	0		2	0.0294	1	1	0
207980_s_at	CITED2	10370	Cbp/p300-interacting transactivator, with Glu/Asp-rich carboxy-terminal domain, 2	29	32	28	29.8	34	28	31	31	29	33	33	31.8	48	59	76	59.8		1.04	1	1.1	0.9138	0	0	0		2	0.1113	1	1	0
209007_s_at	C1orf63	57035	chromosome 1 open reading frame 63	151	139	128	139	133	117	150	132.7	152	162	149	154	209	312	331	278.6		-1.05	1	1.1	0.8691	0	0	0		2	0.1338	1	1	0
225832_s_at	LOC221955	221955	KCCR13L	55	59	62	58.3	62	53	57	57	63	71	82	71.6	95	113	148	116.8		-1.02	1	1.2	0.8205	0	0	0		2	0.1084	1	1	0
201631_s_at	IER3	8870	immediate early response 3	705	755	741	733.4	631	699	752	692.2	539	538	577	551.2	1428	1426	1558	1469.5		-1.06	1	-1.3	0.3554	0	0	0		2	0.0098	1	1	0
213618_at	CENTD1	116984	centaurin, delta 1	16	14	16	15.4	17	15	15	15.6	16	18	16	16.8	24	36	34	30.8		1.02	1	1.1	0.8926	0	0	0		2	0.1203	1	1	0
227670_at	ZNF75A	7627	zinc finger protein 75a	50	49	51	49.9	48	40	56	47.6	56	58	55	56.3	80	111	113	99.8		-1.05	1	1.1	0.481	0	0	0		2	0.0826	1	1	0
1555411_a_at	CCNL1	57018	cyclin L1	143	157	146	148.9	159	128	173	152.4	152	166	149	155.7	266	314	314	297		1.02	1	1	0.9336	0	0	0		2	0.026	1	1	0
201326_at	CCT6A	908	chaperonin containing TCP1, subunit 6A (zeta 1)	589	579	585	584.2	577	534	565	558.5	662	675	645	660.6	1151	1186	1159	1165.1		-1.05	1	1.1	0.3884	0	0	0		2	0.0011	1	1	0
209291_at	ID4	3400	inhibitor of DNA binding 4, dominant negative helix-loop-helix protein	150	181	175	167.9	174	143	190	168	171	221	201	196.9	262	381	374	334.5		1	1	1.2	0.8897	0	0	0		2	0.1116	1	1	0
217907_at	MRPL18	29074	mitochondrial ribosomal protein L18	925	972	1017	970.5	977	976	1026	992.6	1116	1044	1079	1079.4	1946	1915	1915	1925		1.02	1	1.1	0.7555	0	0	0		2	0.0061	1	1	0
235440_at	FLJ39441	144108	hypothetical protein FLJ39441	54	59	51	54.5	60	41	61	53.3	61	59	62	60.6	84	114	132	108.1		-1.02	1	1.1	0.8114	0	0	0		2	0.1196	1	1	0
231989_s_at	LOC23117 /// LOC440345 /// LOC641298	23117 /// 440345 /// 641298	KIAA0220-like protein /// hypothetical protein LOC440345 /// PI-3-kinase-related kinase SMG-1 - like locus	45	38	36	39.6	43	28	43	37.3	50	43	38	43.7	63	88	86	78.4		-1.06	1	1.1	0.9389	0	0	0		2	0.0995	1	1	0
226800_at	KIAA1799	84455	KIAA1799 protein	41	42	44	42.2	40	30	39	35.7	49	60	57	55.1	65	94	95	83.6		-1.18	1	1.3	0.6783	0	0	0		2	0.1061	1	1	0
215195_at	PRKCA	5578	protein kinase C, alpha	81	91	82	84.5	83	80	82	81.4	74	83	84	80	165	169	167	167.2		-1.04	1	-1.1	0.9361	0	0	0		2	0.0106	1	1	0
225239_at			CDNA FLJ26120 fis, clone SYN00419	84	67	87	78.7	114	72	102	94.3	93	108	98	99.4	141	143	187	155.7		1.2	1	1.3	0.826	0	0	0		2	0.0981	1	1	0
201565_s_at	ID2	3398	inhibitor of DNA binding 2, dominant negative helix-loop-helix protein	585	610	595	596.4	602	536	674	601.4	604	596	651	616.2	967	1274	1329	1178.5		1.01	1	1	0.9315	0	0	0		2	0.069	1	1	0
241371_at	TNFRSF10A	8797	Tumor necrosis factor receptor superfamily, member 10a	47	52	64	53.9	54	35	51	46	55	48	55	52.5	108	102	109	106.3		-1.17	1	-1	0.9854	0	0	0		2	0.0589	1	1	0
212445_s_at	NEDD4L	23327	neural precursor cell expressed, developmentally down-regulated 4-like	125	146	138	136.2	126	144	145	138.2	144	151	147	147.4	265	247	296	268.5		1.01	1	1.1	0.8901	0	0	0		2	0.0348	1	1	0
1569263_at	CSNK1D	1453	Casein kinase 1, delta	27	26	29	27.3	28	30	29	29.2	25	30	27	27.5	48	48	67	53.8		1.07	1	1	0.9923	0	0	0		2	0.0917	1	1	0
221541_at	CRISPLD2	83716	cysteine-rich secretory protein LCCL domain containing 2	25	25	22	23.7	26	26	21	24.1	30	21	24	24.5	36	56	51	46.6		1.02	1	1	0.9814	0	0	0		2	0.1247	1	1	0
225988_at	HERC4	26091	hect domain and RLD 4	172	162	172	168.4	163	153	195	169.5	159	191	190	179.6	302	349	343	330.9		1.01	1	1.1	0.9361	0	0	0		2	0.0192	1	1	0
208811_s_at	DNAJB6	10049	DnaJ (Hsp40) homolog, subfamily B, member 6	203	227	214	214.4	200	232	200	210	287	272	281	279.9	373	412	485	420.8		-1.02	1	1.3	0.4368	0	0	0		2	0.0491	1	1	0
208785_s_at	MAP1LC3B	81631	microtubule-associated protein 1 light chain 3 beta	190	199	190	192.9	214	193	202	203.2	191	200	196	195.5	336	406	396	378.2		1.05	1	1	0.9626	0	0	0		2	0.0273	1	1	0
209410_s_at	GRB10	2887	growth factor receptor-bound protein 10	72	76	69	72.4	76	72	70	72.4	81	85	92	85.9	142	146	138	141.7		1	1	1.2	0.695	0	0	0		2	0.008	1	1	0
244242_at			CDNA clone IMAGE:5295866	26	30	24	26.5	32	25	23	26.4	28	28	26	27.5	43	60	54	51.9		-1	1	1	0.9738	0	0	0		2	0.0973	1	1	0
213191_at	TICAM1	148022	toll-like receptor adaptor molecule 1	32	44	38	37.5	35	35	39	36.3	33	34	37	34.2	92	56	76	73.2		-1.03	1	-1.1	0.9461	0	0	0		2	0.1787	0	0	0
230047_at	FLJ32810	143872	hypothetical protein FLJ32810	26	25	28	26	28	18	30	24.5	26	28	29	27.6	27	73	66	50.7		-1.06	1	1.1	0.8954	0	0	0		1.9	0.4149	0	0	0
223168_at	RHOU	58480	ras homolog gene family, member U	83	108	101	96.9	99	94	110	100.6	113	122	125	120.1	167	201	200	188.5		1.04	1	1.2	0.8122	0	0	0		1.9	0.0705	1	1	0
218723_s_at	RGC32	28984	response gene to complement 32	26	32	28	28.6	27	19	25	23.3	29	39	31	32.6	37	71	64	55.6		-1.23	1	1.1	0.9215	0	0	0		1.9	0.248	0	0	0
221903_s_at	CYLD	1540	cylindromatosis (turban tumor syndrome)	48	57	50	51.6	50	42	59	49.8	57	60	57	57.6	93	101	107	100.3		-1.04	1	1.1	0.8662	0	0	0		1.9	0.0348	1	1	0
209325_s_at	RGS16	6004	regulator of G-protein signalling 16	25	23	26	24.6	26	29	33	29.3	34	29	26	29.6	51	51	42	47.7		1.19	1	1.2	0.8488	0	0	0		1.9	0.0373	1	1	0
219682_s_at	TBX3	6926	T-box 3 (ulnar mammary syndrome)	73	92	90	84.4	88	73	89	82.8	75	85	90	82.9	119	194	190	163.6		-1.02	1	-1	0.989	0	0	0		1.9	0.1885	0	0	0
207536_s_at	TNFRSF9	3604	tumor necrosis factor receptor superfamily, member 9	24	19	20	20.6	25	25	22	23.8	25	26	28	26.1	36	34	51	39.9		1.16	1	1.3	0.7666	0	0	0		1.9	0.1304	1	1	0
221962_s_at	UBE2H	7328	ubiquitin-conjugating enzyme E2H (UBC8 homolog, yeast)	84	96	98	92.2	90	85	100	91.5	100	109	101	103.4	170	177	190	178.8		-1.01	1	1.1	0.8555	0	0	0		1.9	0.0256	1	1	0
214446_at	ELL2	22936	elongation factor, RNA polymerase II, 2	35	42	41	39.2	38	52	46	45.2	43	56	50	49.2	64	75	92	76		1.15	1	1.3	0.8372	0	0	0		1.9	0.0989	1	1	0
225916_at	ZNF131	7690	zinc finger protein 131 (clone pHZ-10)	40	45	47	44	44	29	49	39.9	51	58	55	54.4	64	99	98	85.3		-1.1	1	1.2	0.695	0	0	0		1.9	0.1456	1	1	0
236613_at	RBM25	58517	RNA binding motif protein 25	22	21	20	21.1	20	16	17	17.5	19	21	19	19.6	31	44	50	40.7		-1.2	1	-1.1	0.8658	0	0	0		1.9	0.141	1	1	0
225919_s_at	C9orf72	203228	chromosome 9 open reading frame 72	39	32	34	34.9	42	29	36	35	36	38	36	36.7	49	81	77	67.4		1	1	1.1	0.9499	0	0	0		1.9	0.1767	0	0	0
226566_at	TRIM11	81559	tripartite motif-containing 11	67	90	88	80.7	78	75	90	80.6	67	76	81	74.2	148	166	152	155.5		-1	1	-1.1	0.957	0	0	0		1.9	0.0758	1	1	0
203003_at	MEF2D	4209	MADS box transcription enhancer factor 2, polypeptide D (myocyte enhancer factor 2D)	47	41	49	45.7	41	50	53	47.9	47	46	49	47	88	80	96	87.9		1.05	1	1	0.9708	0	0	0		1.9	0.0439	1	1	0
208707_at	EIF5	1983	eukaryotic translation initiation factor 5	47	64	55	55	59	69	57	61.5	58	71	65	64.6	106	108	103	105.7		1.12	1	1.2	0.896	0	0	0		1.9	0.0552	1	1	0
225612_s_at	B3GNT5	84002	UDP-GlcNAc:betaGal beta-1,3-N-acetylglucosaminyltransferase 5	104	93	106	100.7	97	77	116	95.2	111	118	112	113.5	177	197	207	193.5		-1.06	1	1.1	0.811	0	0	0		1.9	0.0308	1	1	0
57703_at	SENP5	205564	SUMO1/sentrin specific peptidase 5	30	32	29	30.2	24	30	31	28.2	27	29	27	27.7	52	57	67	58.1		-1.07	1	-1.1	0.8649	0	0	0		1.9	0.0542	1	1	0
206748_s_at	SPAG9	9043	sperm associated antigen 9	76	96	81	83.9	77	67	74	72.7	87	78	84	82.7	146	174	165	161		-1.15	1	-1	0.9893	0	0	0		1.9	0.0583	1	1	0
219292_at	THAP1	55145	THAP domain containing, apoptosis associated protein 1	72	86	88	81.8	82	45	84	67.6	84	95	93	90.6	130	160	186	157		-1.21	1	1.1	0.904	0	0	0		1.9	0.1009	1	1	0
224489_at	LOC284058	284058	LOC284058 protein /// LOC284058 protein	44	44	46	44.7	49	37	51	45	53	48	45	48.4	64	108	91	85.6		1.01	1	1.1	0.8926	0	0	0		1.9	0.1576	0	0	0
205920_at	SLC6A6	6533	solute carrier family 6 (neurotransmitter transporter, taurine), member 6	23	29	20	23.6	21	20	22	20.8	26	22	21	23	37	46	54	45.3		-1.13	1	-1	0.9867	0	0	0		1.9	0.1579	0	0	0
201841_s_at	HSPB1	3315	heat shock 27kDa protein 1	1394	1625	1535	1515.2	1447	1535	1696	1556.1	1772	1822	1857	1816.3	3051	2663	3002	2900.3		1.03	1	1.2	0.6752	0	0	0		1.9	0.0298	1	1	0
200894_s_at	FKBP4	2288	FK506 binding protein 4, 59kDa	245	288	272	267.6	278	238	287	266.7	390	376	393	386.5	483	514	541	512		-1	1	1.4	0.4304	0	0	0		1.9	0.0258	1	1	0
204615_x_at	IDI1	3422	isopentenyl-diphosphate delta isomerase 1	359	363	370	364	345	357	368	356.2	394	392	409	398.5	687	708	692	695.6		-1.02	1	1.1	0.5313	0	0	0		1.9	0.0016	1	1	0
1554229_at	LOC153222	153222	adult retina protein	28	26	29	27.7	29	28	32	29.8	35	29	32	32	47	56	56	52.9		1.08	1	1.2	0.8292	0	0	0		1.9	0.0287	1	1	0
210138_at	RGS20	8601	regulator of G-protein signalling 20	73	83	78	77.9	73	58	84	71	83	88	78	82.7	155	141	150	148.7		-1.1	1	1.1	0.9271	0	0	0		1.9	0.0178	1	1	0
210136_at	MBP	4155	myelin basic protein	168	178	176	174	162	159	184	167.8	225	187	206	205.4	338	305	356	332.3		-1.04	1	1.2	0.7847	0	0	0		1.9	0.0195	1	1	0
201702_s_at	PPP1R10	5514	protein phosphatase 1, regulatory subunit 10	91	109	106	101.8	105	114	105	107.8	100	105	95	99.7	206	197	180	194.3		1.06	1	-1	0.98	0	0	0		1.9	0.0364	1	1	0
201844_s_at	RYBP	23429	RING1 and YY1 binding protein	239	264	271	257.6	248	216	274	244.7	276	275	272	274.4	505	481	490	491.6		-1.05	1	1.1	0.8923	0	0	0		1.9	0.014	1	1	0
212989_at	TMEM23	259230	transmembrane protein 23	179	161	173	171.1	177	116	168	151.1	173	221	204	198.3	262	372	357	326.5		-1.13	1	1.2	0.8702	0	0	0		1.9	0.0944	1	1	0
202455_at	HDAC5	10014	histone deacetylase 5	46	52	40	45.9	53	58	51	54.1	41	46	49	44.9	86	97	81	87.6		1.18	1	-1	0.9854	0	0	0		1.9	0.0617	1	1	0
204195_s_at	PKNOX1	5316	PBX/knotted 1 homeobox 1	38	45	46	42.9	55	47	43	48.3	50	53	47	49.9	90	80	75	81.7		1.13	1	1.2	0.8544	0	0	0		1.9	0.0531	1	1	0
215498_s_at	MAP2K3	5606	mitogen-activated protein kinase kinase 3 /// mitogen-activated protein kinase kinase 3	89	102	108	99.5	84	87	99	89.5	91	94	109	97.7	154	206	215	189.5		-1.11	1	-1	0.986	0	0	0		1.9	0.0982	1	1	0
230387_at	ATP2C1	27032	ATPase, Ca++ transporting, type 2C, member 1	74	53	65	63.6	64	57	80	66.4	55	76	65	65	85	132	159	121		1.04	1	1	0.9899	0	0	0		1.9	0.2581	0	0	0
239845_at			Transcribed locus	25	25	24	24.5	22	23	25	23.3	23	19	24	22	37	49	55	46.7		-1.05	1	-1.1	0.8926	0	0	0		1.9	0.101	1	1	0
226499_at	MGC61598	441478	Similar to ankyrin-repeat protein Nrarp	76	78	77	77.2	84	65	81	76.3	82	76	79	79	145	148	146	146.6		-1.01	1	1	0.9476	0	0	0		1.9	0.001	1	1	0
230820_at	SMURF2	64750	SMAD specific E3 ubiquitin protein ligase 2	92	96	100	95.9	88	93	107	95.7	77	110	101	95.3	160	196	193	182		-1	1	-1	0.9961	0	0	0		1.9	0.038	1	1	0
208763_s_at	TSC22D3	1831	TSC22 domain family, member 3	73	76	74	74.3	81	60	74	70.9	57	61	70	62.5	143	144	136	140.9		-1.05	1	-1.2	0.8047	0	0	0		1.9	0.004	1	1	0
227037_at	LOC201164	201164	similar to CG12314 gene product	53	46	50	49.2	52	35	52	45.8	47	52	48	48.7	79	97	106	93.2		-1.07	1	-1	0.989	0	0	0		1.9	0.0729	1	1	0
1558322_a_at	PAQR9	344838	progestin and adipoQ receptor family member IX	25	33	31	29.7	27	23	28	26	29	29	32	29.9	52	47	72	56.2		-1.15	1	1	0.994	0	0	0		1.9	0.1547	0	0	0
243304_at	LOC286109	286109	hypothetical protein LOC286109	35	37	27	32.6	24	45	34	33.2	35	38	40	37.4	61	56	68	61.6		1.02	1	1.1	0.904	0	0	0		1.9	0.0897	1	1	0
220081_x_at	HSD17B7	51478	hydroxysteroid (17-beta) dehydrogenase 7	238	214	212	221	232	196	222	216.1	223	249	226	232.4	347	448	468	417.1		-1.02	1	1.1	0.9389	0	0	0		1.9	0.0778	1	1	0
230050_at	BTBD14A	138151	BTB (POZ) domain containing 14A	34	41	35	36.5	37	47	41	41.2	39	44	38	40.3	70	65	72	68.8		1.13	1	1.1	0.9102	0	0	0		1.9	0.0364	1	1	0
229292_at	EPB41L5	57669	erythrocyte membrane protein band 4.1 like 5	33	27	31	30.3	31	22	29	27.3	35	34	27	31.9	42	59	75	57.1		-1.11	1	1.1	0.9697	0	0	0		1.9	0.2134	0	0	0
226252_at			CDNA FLJ34585 fis, clone KIDNE2008758	161	125	156	146.8	153	122	180	149.7	174	165	173	170.6	268	270	291	276.2		1.02	1	1.2	0.8742	0	0	0		1.9	0.0573	1	1	0
221765_at	UGCG	7357	UDP-glucose ceramide glucosyltransferase	44	49	53	48.5	53	39	58	49.2	51	60	55	55.1	66	104	110	90.9		1.01	1	1.1	0.8772	0	0	0		1.9	0.1909	0	0	0
209967_s_at	CREM	1390	cAMP responsive element modulator	110	103	108	106.8	120	96	108	107.4	97	111	128	111.4	164	220	223	200.2		1.01	1	1	0.9703	0	0	0		1.9	0.0831	1	1	0
1569344_a_at			Homo sapiens, clone IMAGE:4044872, mRNA	23	20	19	20.9	25	20	25	23	28	32	24	27.9	33	40	46	39.3		1.1	1	1.3	0.8011	0	0	0		1.9	0.0906	1	1	0
202918_s_at	PREI3	25843	preimplantation protein 3	640	585	568	596.9	570	541	607	572	584	626	627	611.8	1029	1174	1160	1119.2		-1.04	1	1	0.9671	0	0	0		1.9	0.0256	1	1	0
211763_s_at	UBE2B	7320	ubiquitin-conjugating enzyme E2B (RAD6 homolog) /// ubiquitin-conjugating enzyme E2B (RAD6 homolog)	149	139	160	149.2	168	111	153	141.5	169	167	161	165.8	253	295	293	279.5		-1.05	1	1.1	0.8253	0	0	0		1.9	0.0355	1	1	0
206034_at	SERPINB8	5271	serpin peptidase inhibitor, clade B (ovalbumin), member 8	34	41	41	38.5	43	39	38	39.8	37	48	37	40.4	67	80	70	72		1.03	1	1	0.9734	0	0	0		1.9	0.0534	1	1	0
218696_at	EIF2AK3	9451	eukaryotic translation initiation factor 2-alpha kinase 3	194	204	197	198.6	186	168	224	191.4	169	192	195	184.9	329	385	407	372		-1.04	1	-1.1	0.9027	0	0	0		1.9	0.0362	1	1	0
41387_r_at	JMJD3	23135	jumonji domain containing 3	75	74	75	74.8	77	89	63	75.7	69	73	70	70.7	145	132	143	140.1		1.01	1	-1.1	0.7247	0	0	0		1.9	0.0082	1	1	0
212444_at	GPCR5A	9052	G protein-coupled receptor, family C, group 5, member A	243	245	270	252.1	282	265	266	271.2	399	375	341	370.8	487	429	503	472		1.08	1	1.5	0.4528	0	0	0		1.9	0.0293	1	1	0
219371_s_at	KLF2	10365	Kruppel-like factor 2 (lung)	81	90	86	85.4	80	98	80	85.6	60	70	55	61	156	149	176	159.8		1	1	-1.4	0.617	0	0	0		1.9	0.0285	1	1	0
205807_s_at	TUFT1	7286	tuftelin 1	108	126	104	112.2	102	64	104	87.7	95	89	97	93.6	186	214	233	210		-1.28	1	-1.2	0.791	0	0	0		1.9	0.0625	1	1	0
213523_at	CCNE1	898	cyclin E1	126	147	148	139.9	128	143	148	139.5	173	168	180	173.7	256	274	255	261.6		-1	1	1.2	0.665	0	0	0		1.9	0.0268	1	1	0
223348_x_at	MUM1	84939	melanoma associated antigen (mutated) 1	55	58	50	54.1	53	56	56	55	60	52	51	54	117	89	100	101.1		1.02	1	-1	0.9985	0	0	0		1.9	0.0668	1	1	0
208576_s_at	HIST1H3B	8358	histone 1, H3b	18	20	19	19.3	21	26	21	22.6	19	25	25	23.1	29	39	43	36.1		1.17	1	1.2	0.8691	0	0	0		1.9	0.1177	1	1	0
208300_at	PTPRH	5794	protein tyrosine phosphatase, receptor type, H	29	38	36	34.1	30	34	37	33.7	33	31	33	32.2	63	64	65	63.8		-1.01	1	-1.1	0.9607	0	0	0		1.9	0.057	1	1	0
212902_at	SEC24A	10802	SEC24 related gene family, member A (S. cerevisiae)	58	71	68	65.5	67	51	65	60.4	56	60	69	61.4	101	138	132	122.2		-1.08	1	-1.1	0.9556	0	0	0		1.9	0.0995	1	1	0
208383_s_at	PCK1	5105	phosphoenolpyruvate carboxykinase 1 (soluble)	16	15	15	15.4	17	16	15	16.2	20	14	18	17.4	25	25	37	28.6		1.05	1	1.1	0.9239	0	0	0		1.9	0.1218	1	1	0
202874_s_at	ATP6V1C1	528	ATPase, H+ transporting, lysosomal 42kDa, V1 subunit C, isoform 1	290	304	275	289.4	308	255	309	289.6	320	316	288	308	542	538	536	538.4		1	1	1.1	0.904	0	0	0		1.9	0.0083	1	1	0
215440_s_at	BEXL1	56271	brain expressed X-linked-like 1	13	15	17	15	15	17	17	16.3	17	18	18	17.8	22	35	29	27.9		1.09	1	1.2	0.8501	0	0	0		1.9	0.1654	0	0	0
204537_s_at	GABRE	2564	gamma-aminobutyric acid (GABA) A receptor, epsilon	67	75	80	74	68	66	78	70.4	76	71	93	79.7	122	142	150	137.4		-1.05	1	1.1	0.9542	0	0	0		1.9	0.0538	1	1	0
1555351_s_at	PPHLN1	51535	periphilin 1	51	57	55	54.5	49	47	53	49.6	54	47	52	50.7	88	112	105	101.2		-1.1	1	-1.1	0.9138	0	0	0		1.9	0.0497	1	1	0
226075_at	SPSB1	80176	splA/ryanodine receptor domain and SOCS box containing 1	61	77	85	73.7	65	41	74	58	66	72	66	67.9	114	133	170	136.9		-1.27	1	-1.1	0.9542	0	0	0		1.9	0.1679	0	0	0
211126_s_at	CSRP2	1466	cysteine and glycine-rich protein 2	120	136	124	126.4	126	123	136	128.4	145	153	158	152.1	226	235	244	234.6		1.02	1	1.2	0.6399	0	0	0		1.9	0.0172	1	1	0
214508_x_at	CREM	1390	cAMP responsive element modulator	100	104	101	101.6	104	101	106	103.8	105	109	114	109	150	212	211	188.5		1.02	1	1.1	0.8011	0	0	0		1.9	0.1042	1	1	0
1554441_a_at	KIAA0261	23063	KIAA0261	65	72	70	69.1	63	68	74	68.2	61	76	72	69.4	118	127	140	128.1		-1.01	1	1	0.9953	0	0	0		1.9	0.0297	1	1	0
236026_at	GPATC2	55105	G patch domain containing 2	40	49	41	43.2	46	34	46	41.6	47	54	47	49.3	63	87	94	80		-1.04	1	1.1	0.8926	0	0	0		1.9	0.1448	1	1	0
223159_s_at	NEK6	10783	NIMA (never in mitosis gene a)-related kinase 6	35	44	45	41.1	46	44	51	47	43	44	58	48	63	82	86	76.1		1.14	1	1.2	0.9149	0	0	0		1.9	0.1192	1	1	0
222243_s_at	TOB2	10766	transducer of ERBB2, 2	104	89	92	94.9	103	79	99	93.3	77	101	100	91.9	131	203	203	175.6		-1.02	1	-1	0.98	0	0	0		1.8	0.169	0	0	0
241418_at		344887	Hypothetical LOC344887	73	77	73	74.2	65	60	74	65.8	60	69	72	66.6	119	139	157	137.2		-1.13	1	-1.1	0.8751	0	0	0		1.8	0.057	1	1	0
221766_s_at	FAM46A	55603	family with sequence similarity 46, member A	152	191	207	181.6	202	198	205	201.4	208	212	216	212	342	304	363	335.6		1.11	1	1.2	0.8915	0	0	0		1.8	0.092	1	1	0
201329_s_at	ETS2	2114	v-ets erythroblastosis virus E26 oncogene homolog 2 (avian)	90	104	84	92	74	71	97	79.7	69	71	76	71.7	144	161	212	170		-1.15	1	-1.3	0.6957	0	0	0		1.8	0.1276	1	1	0
221517_s_at	CRSP6	9440	cofactor required for Sp1 transcriptional activation, subunit 6, 77kDa	147	159	162	156.1	161	142	177	159.5	133	161	169	153.4	222	319	340	288.4		1.02	1	-1	0.9869	0	0	0		1.8	0.139	1	1	0
221973_at			Full-length cDNA clone CS0DM011YC22 of Fetal liver of Homo sapiens (human)	19	20	18	19.3	21	22	21	21.2	19	20	25	20.9	27	42	39	35.6		1.1	1	1.1	0.9451	0	0	0		1.8	0.1547	0	0	0
202301_s_at	FLJ11021	65117	similar to splicing factor, arginine/serine-rich 4	157	169	165	163.7	165	163	190	172	204	199	179	194	288	308	311	302.1		1.05	1	1.2	0.6847	0	0	0		1.8	0.0102	1	1	0
236609_at	PMS1	5378	PMS1 postmeiotic segregation increased 1 (S. cerevisiae)	24	27	26	25.7	25	19	26	23	26	25	26	25.9	43	55	46	47.4		-1.12	1	1	0.989	0	0	0		1.8	0.057	1	1	0
212614_at	ARID5B	84159	AT rich interactive domain 5B (MRF1-like)	75	83	91	82.7	88	75	91	84.4	97	113	101	103.4	167	133	160	152.3		1.02	1	1.3	0.7678	0	0	0		1.8	0.07	1	1	0
1555420_a_at	KLF7	8609	Kruppel-like factor 7 (ubiquitous)	34	31	28	31	32	23	37	30	32	30	35	32.4	42	63	71	57.1		-1.03	1	1	0.9673	0	0	0		1.8	0.209	0	0	0
208881_x_at	IDI1	3422	isopentenyl-diphosphate delta isomerase 1	378	393	388	386.3	346	364	369	359.4	412	410	428	416.5	682	721	731	711.1		-1.07	1	1.1	0.6337	0	0	0		1.8	0.0057	1	1	0
201751_at	KIAA0063	9929	KIAA0063 gene product	221	247	241	236	214	195	224	210.7	241	247	251	246.3	422	432	449	434.3		-1.12	1	1	0.9198	0	0	0		1.8	0.0138	1	1	0
225833_at	LOC221955	221955	KCCR13L	40	37	35	37.3	39	41	42	40.7	46	43	53	47.1	63	67	76	68.7		1.09	1	1.3	0.7291	0	0	0		1.8	0.038	1	1	0
226914_at	ARPC5L	81873	actin related protein 2/3 complex, subunit 5-like	70	74	84	75.7	72	69	81	73.6	82	89	98	89.7	127	150	141	139.2		-1.03	1	1.2	0.8396	0	0	0		1.8	0.0479	1	1	0
209912_s_at	KIAA0415	9907	KIAA0415 protein	32	41	36	36	36	57	43	44.3	29	33	35	32.1	64	65	70	66.3		1.23	1	-1.1	0.9149	0	0	0		1.8	0.0474	1	1	0
237058_x_at	SLC6A13	6540	solute carrier family 6 (neurotransmitter transporter, GABA), member 13	15	16	16	15.5	17	19	17	17.6	18	18	15	16.9	29	28	29	28.5		1.13	1	1.1	0.8926	0	0	0		1.8	0.0111	1	1	0
200788_s_at	PEA15	8682	phosphoprotein enriched in astrocytes 15	196	240	248	226.8	231	168	215	203.2	258	249	267	257.9	391	453	407	416.5		-1.12	1	1.1	0.8885	0	0	0		1.8	0.063	1	1	0
216150_at			CDNA FLJ11547 fis, clone HEMBA1002934	22	19	21	20.6	22	27	20	22.9	23	20	20	20.8	34	36	43	37.8		1.11	1	1	0.9869	0	0	0		1.8	0.0557	1	1	0
205100_at	GFPT2	9945	glutamine-fructose-6-phosphate transaminase 2	42	47	50	46.2	45	41	55	46.7	49	50	61	52.9	76	85	95	84.9		1.01	1	1.1	0.8926	0	0	0		1.8	0.0567	1	1	0
1552472_a_at	CENTB2	23527	centaurin, beta 2	26	25	29	26.6	21	24	26	23.7	22	30	26	25.9	38	51	60	48.8		-1.12	1	-1	0.9854	0	0	0		1.8	0.1543	0	0	0
41512_at	BRAP	8315	BRCA1 associated protein	81	99	91	90.4	87	71	90	82	93	100	105	99.4	157	168	173	166		-1.1	1	1.1	0.904	0	0	0		1.8	0.0366	1	1	0
205899_at	CCNA1	8900	cyclin A1	14	12	14	12.8	14	12	13	13.1	13	14	13	13.2	19	23	30	23.5		1.02	1	1	0.9703	0	0	0		1.8	0.1453	1	1	0
218614_at	FLJ10652	55196	hypothetical protein FLJ10652	190	162	184	178.2	180	169	204	183.7	167	190	174	176.8	321	317	341	326.1		1.03	1	-1	0.9924	0	0	0		1.8	0.0263	1	1	0
218138_at	MKKS	8195	McKusick-Kaufman syndrome	298	299	311	302.8	309	297	317	307.6	298	322	315	311.4	541	589	533	553.9		1.02	1	1	0.9324	0	0	0		1.8	0.0116	1	1	0
1564651_at	LOC221710	221710	hypothetical protein LOC221710	33	33	35	33.7	37	24	32	30.6	38	44	40	40.6	45	71	74	61.7		-1.1	1	1.2	0.7087	0	0	0		1.8	0.1864	0	0	0
209485_s_at	OSBPL1A	114876	oxysterol binding protein-like 1A	79	88	87	84.2	73	69	93	77.5	120	107	109	111.9	151	158	153	154		-1.09	1	1.3	0.5105	0	0	0		1.8	0.0131	1	1	0
232641_at	ZNF596	169270	zinc finger protein 596	17	15	15	15.4	19	13	14	15	15	15	15	15	21	30	34	28.1		-1.02	1	-1	0.9703	0	0	0		1.8	0.1577	0	0	0
212226_s_at	PPAP2B	8613	phosphatidic acid phosphatase type 2B	245	256	273	257.7	301	274	320	297.5	401	365	401	388.7	507	438	470	470.8		1.15	1	1.5	0.3583	0	0	0		1.8	0.0252	1	1	0
209301_at	CA2	760	carbonic anhydrase II	91	93	91	91.6	102	69	90	85.9	87	113	107	101.7	140	188	177	167.2		-1.07	1	1.1	0.9133	0	0	0		1.8	0.0701	1	1	0
239058_at			Transcribed locus	26	25	24	24.8	24	27	25	25.4	22	28	28	26	46	49	42	45.3		1.02	1	1	0.9673	0	0	0		1.8	0.0252	1	1	0
212756_s_at	UBR2	23304	ubiquitin protein ligase E3 component n-recognin 2	76	77	87	79.8	66	81	83	76.1	78	86	92	85.1	147	148	142	145.4		-1.05	1	1.1	0.9381	0	0	0		1.8	0.021	1	1	0
204544_at	HPS5	11234	Hermansky-Pudlak syndrome 5	156	170	158	161.2	168	156	171	165.2	163	171	170	168	271	294	317	293.5		1.03	1	1	0.9098	0	0	0		1.8	0.0258	1	1	0
219045_at	RHOF	54509	ras homolog gene family, member F (in filopodia)	252	266	276	264.7	268	268	291	275.5	323	305	328	318.5	485	469	490	481		1.04	1	1.2	0.5352	0	0	0		1.8	0.0089	1	1	0
223124_s_at	C1orf128	57095	chromosome 1 open reading frame 128	131	141	132	134.6	119	107	126	117.2	147	141	131	139.4	244	240	250	244.6		-1.15	1	1	0.9491	0	0	0		1.8	0.0066	1	1	0
208810_at	DNAJB6	10049	DnaJ (Hsp40) homolog, subfamily B, member 6	249	217	225	230	223	184	240	214.3	310	369	318	331.2	298	475	516	418		-1.07	1	1.4	0.5378	0	0	0		1.8	0.2216	0	0	0
210307_s_at	ENC2	64410	BTB/POZ KELCH domain protein	51	49	56	51.8	52	48	56	52	53	56	54	54.4	89	92	102	94.2		1	1	1	0.9348	0	0	0		1.8	0.0333	1	1	0
203068_at	KLHL21	9903	kelch-like 21 (Drosophila)	39	50	48	45.3	43	36	50	42.9	41	44	48	44	69	82	97	82.2		-1.05	1	-1	0.9814	0	0	0		1.8	0.1245	1	1	0
223218_s_at	NFKBIZ	64332	nuclear factor of kappa light polypeptide gene enhancer in B-cells inhibitor, zeta	72	69	73	71.3	73	59	82	70.5	72	93	82	82.1	93	151	155	129.4		-1.01	1	1.2	0.8694	0	0	0		1.8	0.2092	0	0	0
225842_at			CDNA clone IMAGE:5531727	132	139	141	137.1	138	132	161	143	201	210	204	205.1	254	253	239	248.5		1.04	1	1.5	0.1418	1	1	0		1.8	0.0087	1	1	0
227292_at	LOC144097	144097	hypothetical protein BC007540	48	66	48	53.2	55	58	54	55.7	68	71	69	69.1	89	94	108	96.4		1.05	1	1.3	0.8287	0	0	0		1.8	0.1204	1	1	0
215931_s_at	ARFGEF2	10564	ADP-ribosylation factor guanine nucleotide-exchange factor 2 (brefeldin A-inhibited)	25	26	29	26.8	32	26	36	30.8	25	31	29	28	43	49	55	48.5		1.15	1	1	0.9648	0	0	0		1.8	0.0598	1	1	0
206536_s_at	BIRC4	331	baculoviral IAP repeat-containing 4	23	25	27	24.9	23	17	23	20.9	22	25	26	24	38	47	51	45.1		-1.19	1	-1	0.9709	0	0	0		1.8	0.0921	1	1	0
1553103_at	NFX1	4799	nuclear transcription factor, X-box binding 1	131	119	118	122.3	114	91	124	108.6	125	134	139	132.9	202	215	250	221.3		-1.13	1	1.1	0.8718	0	0	0		1.8	0.0476	1	1	0
219397_at	FLJ13448	80219	hypothetical protein FLJ13448	177	182	174	177.9	164	159	174	165.7	178	180	183	180	312	326	327	321.4		-1.07	1	1	0.9586	0	0	0		1.8	0.0043	1	1	0
1554148_a_at	SLC33A1	9197	solute carrier family 33 (acetyl-CoA transporter), member 1	81	69	76	75.2	76	66	81	74.2	85	84	82	83.6	123	145	141	135.9		-1.01	1	1.1	0.8466	0	0	0		1.8	0.0443	1	1	0
218368_s_at	TNFRSF12A	51330	tumor necrosis factor receptor superfamily, member 12A	177	178	159	171.4	140	158	172	156	215	194	207	205.4	357	285	291	309.4		-1.1	1	1.2	0.6847	0	0	0		1.8	0.0599	1	1	0
206924_at	IL11	3589	interleukin 11	52	69	63	60.6	64	51	67	60.2	60	57	70	62.1	106	114	109	109.4		-1.01	1	1	0.9861	0	0	0		1.8	0.0687	1	1	0
222706_at	FLJ20291	54883	hypothetical protein FLJ20291	49	51	58	52.2	51	45	55	50.2	46	43	54	47.3	60	105	132	94		-1.04	1	-1.1	0.9294	0	0	0		1.8	0.3592	0	0	0
211105_s_at	NFATC1	4772	nuclear factor of activated T-cells, cytoplasmic, calcineurin-dependent 1	53	68	59	59.7	66	64	62	64.1	54	60	59	57.6	103	100	121	107.6		1.07	1	-1	0.9756	0	0	0		1.8	0.0809	1	1	0
235308_at	ZBTB20	26137	zinc finger and BTB domain containing 20	289	234	257	259	281	234	275	262.6	299	290	293	294.1	397	480	533	466.5		1.01	1	1.1	0.8581	0	0	0		1.8	0.0965	1	1	0
210574_s_at	NUDC	10726	nuclear distribution gene C homolog (A. nidulans)	409	413	379	400	372	379	402	383.9	402	414	447	420.8	767	662	734	719.8		-1.04	1	1.1	0.9193	0	0	0		1.8	0.0252	1	1	0
209282_at	PRKD2	25865	protein kinase D2	71	87	84	80.7	85	78	95	86	91	95	99	95	135	144	158	145.1		1.07	1	1.2	0.827	0	0	0		1.8	0.0556	1	1	0
218360_at	RAB22A	57403	RAB22A, member RAS oncogene family	120	132	122	124.3	115	114	134	120.8	141	129	143	137.6	215	218	238	223.4		-1.03	1	1.1	0.8434	0	0	0		1.8	0.0196	1	1	0
218214_at	FLJ11773	60673	hypothetical protein FLJ11773	266	309	302	291.8	273	271	288	277.4	253	283	284	273.1	513	532	526	523.5		-1.05	1	-1.1	0.9296	0	0	0		1.8	0.0228	1	1	0
226334_s_at	AHSA2	130872	AHA1, activator of heat shock 90kDa protein ATPase homolog 2 (yeast)	159	150	150	153	160	124	168	149.6	183	186	181	183.3	231	286	313	274.5		-1.02	1	1.2	0.3987	0	0	0		1.8	0.0768	1	1	0
202284_s_at	CDKN1A	1026	cyclin-dependent kinase inhibitor 1A (p21, Cip1)	204	235	240	226	228	212	228	222.6	164	163	186	170.7	420	379	419	405.4		-1.02	1	-1.3	0.623	0	0	0		1.8	0.0354	1	1	0
203298_s_at	JARID2	3720	Jumonji, AT rich interactive domain 2	74	72	77	74.5	77	55	74	67.8	92	86	91	89.8	119	143	141	133.7		-1.1	1	1.2	0.4628	0	0	0		1.8	0.0373	1	1	0
225884_s_at	ZNF336	64412	zinc finger protein 336	139	138	146	141.2	146	129	148	140.6	191	207	184	193.8	258	261	241	253.3		-1	1	1.4	0.408	0	0	0		1.8	0.0102	1	1	0
210691_s_at	CACYBP	27101	calcyclin binding protein	631	583	605	605.6	601	516	560	557.8	674	735	758	721.2	975	1181	1112	1085.8		-1.09	1	1.2	0.6337	0	0	0		1.8	0.0362	1	1	0
223430_at	SNF1LK2	23235	SNF1-like kinase 2	55	59	59	57.7	62	66	62	63.6	53	57	56	55.3	85	116	112	103.5		1.1	1	-1	0.9208	0	0	0		1.8	0.0896	1	1	0
227964_at	FKSG44	83786	FKSG44 gene	146	156	155	152.3	160	123	162	146.9	167	190	169	174.9	241	283	298	272.7		-1.04	1	1.1	0.7754	0	0	0		1.8	0.0426	1	1	0
204421_s_at	FGF2	2247	fibroblast growth factor 2 (basic)	57	64	67	62.7	60	66	72	65.9	86	73	66	74.4	112	108	117	112.1		1.05	1	1.2	0.8702	0	0	0		1.8	0.0248	1	1	0
1555355_a_at	ETS1	2113	v-ets erythroblastosis virus E26 oncogene homolog 1 (avian)	14	19	17	16.5	17	21	18	18.3	16	18	15	16.3	24	36	30	29.5		1.11	1	-1	0.9923	0	0	0		1.8	0.1609	0	0	0
209308_s_at	BNIP2	663	BCL2/adenovirus E1B 19kDa interacting protein 2	182	162	182	175.2	190	161	190	179.8	187	189	189	188.3	265	340	341	313.3		1.03	1	1.1	0.8702	0	0	0		1.8	0.0778	1	1	0
1552897_a_at	KCNG3	170850	potassium voltage-gated channel, subfamily G, member 3	17	16	17	16.8	17	15	14	15.2	17	15	17	16.4	27	29	35	30.1		-1.1	1	-1	0.9756	0	0	0		1.8	0.0591	1	1	0
223898_at	ZNF670	93474	zinc finger protein 670	19	16	18	17.6	17	14	18	16.2	21	20	24	21.6	21	34	43	31.5		-1.09	1	1.2	0.7972	0	0	0		1.8	0.3043	0	0	0
224453_s_at	ETNK1	55500	ethanolamine kinase 1 /// ethanolamine kinase 1	39	36	36	36.8	37	28	38	33.9	31	35	29	31.4	53	72	74	65.5		-1.08	1	-1.2	0.8059	0	0	0		1.8	0.1016	1	1	0
201772_at	AZIN1	51582	antizyme inhibitor 1	318	333	378	341.8	331	319	335	328.1	312	398	369	357.6	536	655	642	608.6		-1.04	1	1	0.9703	0	0	0		1.8	0.0644	1	1	0
200895_s_at	FKBP4	2288	FK506 binding protein 4, 59kDa	509	599	585	562.5	583	589	584	585.2	784	736	752	757.4	1033	955	1017	1001.1		1.04	1	1.3	0.5352	0	0	0		1.8	0.0314	1	1	0
205330_at	MN1	4330	meningioma (disrupted in balanced translocation) 1	26	29	25	26.7	28	23	29	26.6	30	32	27	29.6	41	46	57	47.5		-1	1	1.1	0.8905	0	0	0		1.8	0.1008	1	1	0
210836_x_at	PDE4D	5144	phosphodiesterase 4D, cAMP-specific (phosphodiesterase E3 dunce homolog, Drosophila)	27	32	33	30.3	31	23	32	28	30	30	29	29.5	36	76	58	54		-1.08	1	-1	0.977	0	0	0		1.8	0.3483	0	0	0
201023_at	TAF7	6879	TAF7 RNA polymerase II, TATA box binding protein (TBP)-associated factor, 55kDa	507	523	534	521.1	518	438	566	504.5	549	570	564	561	845	951	991	926.7		-1.03	1	1.1	0.6722	0	0	0		1.8	0.0253	1	1	0
225265_at	RBMS1	5937	RNA binding motif, single stranded interacting protein 1	166	173	170	169.6	144	148	165	152.2	151	159	159	156.2	291	299	314	301.2		-1.11	1	-1.1	0.6632	0	0	0		1.8	0.0067	1	1	0
241262_at				18	20	21	19.8	19	16	19	17.8	17	20	16	17.6	27	38	42	35.2		-1.11	1	-1.1	0.9027	0	0	0		1.8	0.1559	0	0	0
201346_at	ADIPOR2	79602	adiponectin receptor 2	386	403	428	405.3	397	378	431	401.3	421	411	424	418.8	659	731	774	719.4		-1.01	1	1	0.9348	0	0	0		1.8	0.0312	1	1	0
228655_at			Unknown mRNA sequence	92	79	93	87.5	72	53	106	74	131	127	122	126.8	143	148	177	155.3		-1.18	1	1.4	0.4715	0	0	0		1.8	0.0691	1	1	0
239431_at	TICAM2	353376	toll-like receptor adaptor molecule 2	31	35	34	33.5	34	30	30	31.1	30	33	34	32.3	45	65	71	59.5		-1.08	1	-1	0.9536	0	0	0		1.8	0.1662	0	0	0
227718_at	PURB	5814	purine-rich element binding protein B	84	78	72	77.8	71	52	78	66.2	75	78	63	71.8	112	154	152	138		-1.18	1	-1.1	0.9361	0	0	0		1.8	0.1141	1	1	0
224336_s_at	DUSP16	80824	dual specificity phosphatase 16 /// dual specificity phosphatase 16	63	78	85	74.7	80	77	84	80	74	76	84	78.1	115	141	141	131.9		1.07	1	1	0.9752	0	0	0		1.8	0.1175	1	1	0
201489_at	PPIF	10105	peptidylprolyl isomerase F (cyclophilin F)	265	322	307	297	272	275	322	288.7	324	323	341	329	491	546	537	524		-1.03	1	1.1	0.8897	0	0	0		1.8	0.0451	1	1	0
204206_at	MNT	4335	MAX binding protein	192	214	213	205.8	202	199	220	206.7	207	193	221	206.6	355	400	337	363		1	1	1	0.9955	0	0	0		1.8	0.0387	1	1	0
217508_s_at	C18orf25	147339	chromosome 18 open reading frame 25	21	21	21	21	19	20	26	21.5	24	24	23	23.8	33	38	41	36.9		1.03	1	1.1	0.3787	0	0	0		1.8	0.038	1	1	0
242807_at	FSD1L	405752	FSD1-like	24	22	20	22.1	20	18	20	19.2	22	20	20	20.4	26	49	46	38.9		-1.15	1	-1.1	0.9146	0	0	0		1.8	0.3056	0	0	0
222870_s_at	B3GNT1	10678	UDP-GlcNAc:betaGal beta-1,3-N-acetylglucosaminyltransferase 1	214	229	216	219.6	238	166	250	214.3	226	269	271	254.1	323	416	429	386.4		-1.02	1	1.2	0.8372	0	0	0		1.8	0.0821	1	1	0
242856_at				19	18	17	18	16	16	17	16.5	18	20	22	19.8	22	34	43	31.6		-1.09	1	1.1	0.9138	0	0	0		1.8	0.2904	0	0	0
226754_at	ZNF251	90987	zinc finger protein 251	32	29	38	32.8	32	32	37	33.9	33	37	36	35.4	52	52	70	57.6		1.03	1	1.1	0.9412	0	0	0		1.8	0.1347	1	1	0
222088_s_at	SLC2A3 /// SLC2A14	144195 /// 6515	solute carrier family 2 (facilitated glucose transporter), member 3 /// solute carrier family 2 (facilitated glucose transporter), member 14	84	84	89	85.8	90	68	96	83.9	127	128	117	123.7	114	183	164	150.6		-1.02	1	1.4	0.301	0	0	0		1.8	0.1774	0	0	0
200779_at	ATF4	468	activating transcription factor 4 (tax-responsive enhancer element B67)	808	900	855	853.6	850	868	864	860.5	936	939	980	951.7	1436	1494	1570	1499		1.01	1	1.1	0.7573	0	0	0		1.8	0.0178	1	1	0
229564_at	dJ222E13.1	253190	Serine hydrolase-like 2	44	45	39	42.7	43	59	41	47.2	37	45	41	41.1	71	81	73	75		1.11	1	-1	0.9703	0	0	0		1.8	0.0414	1	1	0
204881_s_at	UGCG	7357	UDP-glucose ceramide glucosyltransferase	400	433	412	414.7	359	347	431	377.3	471	465	453	463.2	733	688	765	728		-1.1	1	1.1	0.617	0	0	0		1.8	0.0166	1	1	0
203053_at	BCAS2	10286	breast carcinoma amplified sequence 2	242	239	228	236.3	226	200	239	220.7	228	257	237	240	403	440	401	414		-1.07	1	1	0.9774	0	0	0		1.8	0.0138	1	1	0
228463_at	FOXA3	3171	forkhead box A3	46	63	65	57.3	58	48	70	58.1	51	51	60	53.9	78	111	116	100.3		1.01	1	-1.1	0.9703	0	0	0		1.8	0.2248	0	0	0
208510_s_at	PPARG	5468	peroxisome proliferative activated receptor, gamma	129	149	132	136.2	121	148	133	133.5	141	158	150	149.4	220	238	257	238.1		-1.02	1	1.1	0.8864	0	0	0		1.7	0.0404	1	1	0
242866_x_at			Transcribed locus	35	41	32	35.9	39	47	33	39.1	48	32	39	38.9	71	60	58	62.8		1.09	1	1.1	0.966	0	0	0		1.7	0.0879	1	1	0
221489_s_at	SPRY4	81848	sprouty homolog 4 (Drosophila)	71	78	69	72.3	77	57	71	67.7	67	80	67	71.4	130	116	134	126.4		-1.07	1	-1	0.9891	0	0	0		1.7	0.0373	1	1	0
239433_at	LRRC8E	80131	leucine rich repeat containing 8 family, member E	19	26	23	22.4	26	20	25	23.4	18	19	25	20.2	32	38	48	39.1		1.05	1	-1.1	0.9556	0	0	0		1.7	0.1846	0	0	0
213473_at	BRAP	8315	BRCA1 associated protein	94	96	102	97.7	107	64	95	86.6	101	105	96	100.5	157	176	180	170.4		-1.13	1	1	0.952	0	0	0		1.7	0.0248	1	1	0
224699_s_at	FAM62B	57488	family with sequence similarity 62 (C2 domain containing) member B	290	315	301	302	295	261	314	289	275	300	304	292.9	508	513	561	526.9		-1.04	1	-1	0.9556	0	0	0		1.7	0.0174	1	1	0
223710_at	CCL26	10344	chemokine (C-C motif) ligand 26	30	28	32	29.7	29	31	31	30.1	29	31	36	32.1	54	51	50	51.7		1.01	1	1.1	0.9298	0	0	0		1.7	0.0215	1	1	0
209158_s_at	PSCD2	9266	pleckstrin homology, Sec7 and coiled-coil domains 2 (cytohesin-2)	119	119	127	121.9	121	113	140	124.1	122	131	133	128.6	218	202	218	212.3		1.02	1	1.1	0.8926	0	0	0		1.7	0.0128	1	1	0
200769_s_at	MAT2A	4144	methionine adenosyltransferase II, alpha	116	123	128	122.4	116	104	141	119.3	120	116	123	119.5	213	205	222	213.3		-1.03	1	-1	0.9607	0	0	0		1.7	0.0165	1	1	0
235707_at	LOC221710	221710	hypothetical protein LOC221710	26	24	22	24.2	21	16	24	20.1	26	28	32	28.9	28	48	55	42.1		-1.2	1	1.2	0.8287	0	0	0		1.7	0.3229	0	0	0
1556194_a_at			CDNA clone IMAGE:5285801	30	30	31	30.1	31	19	29	25.7	37	47	38	40.2	33	66	65	52.4		-1.17	1	1.3	0.6814	0	0	0		1.7	0.3556	0	0	0
225687_at	C20orf129	81610	chromosome 20 open reading frame 129	576	625	602	600.6	541	525	590	551.3	583	573	593	582.9	981	1049	1106	1044.1		-1.09	1	-1	0.9241	0	0	0		1.7	0.0197	1	1	0
1555350_at	PPHLN1	51535	periphilin 1	31	33	28	30.6	34	44	33	36.5	30	34	37	33.4	48	57	55	53.1		1.19	1	1.1	0.9199	0	0	0		1.7	0.0482	1	1	0
238693_at	PHC3	80012	Polyhomeotic like 3 (Drosophila)	31	34	34	33.1	33	28	34	31.7	35	51	41	41.9	41	63	74	57.5		-1.05	1	1.3	0.8555	0	0	0		1.7	0.2634	0	0	0
220046_s_at	CCNL1	57018	cyclin L1	196	187	203	195.2	208	179	199	195.1	207	199	211	205.3	314	358	346	338.8		-1	1	1.1	0.8897	0	0	0		1.7	0.0237	1	1	0
212561_at	RAB6IP1	23258	RAB6 interacting protein 1	169	187	172	175.8	181	170	197	182.1	177	183	190	183.2	290	301	325	305.1		1.04	1	1	0.9288	0	0	0		1.7	0.0227	1	1	0
218280_x_at	HIST2H2AA	8337	histone 2, H2aa	164	183	175	174	197	203	193	197.4	179	185	178	180.7	307	308	290	301.6		1.13	1	1	0.9255	0	0	0		1.7	0.0156	1	1	0
201883_s_at	B4GALT1	2683	UDP-Gal:betaGlcNAc beta 1,4- galactosyltransferase, polypeptide 1	94	79	65	78.3	100	59	70	74.4	117	81	91	95.1	169	131	113	135.7		-1.05	1	1.2	0.9138	0	0	0		1.7	0.2165	0	0	0
200806_s_at	HSPD1	3329	heat shock 60kDa protein 1 (chaperonin)	2587	2567	2410	2519.8	2602	2659	2602	2621.1	2885	2666	2767	2771.1	4201	4347	4557	4365.6		1.04	1	1.1	0.7779	0	0	0		1.7	0.0125	1	1	0
215499_at	MAP2K3	5606	mitogen-activated protein kinase kinase 3 /// mitogen-activated protein kinase kinase 3	173	184	192	182.9	157	188	210	183.8	190	183	175	182.4	314	303	335	316.8		1.01	1	-1	0.9958	0	0	0		1.7	0.0199	1	1	0
224490_s_at	LOC284058	284058	LOC284058 protein /// LOC284058 protein	24	24	23	23.6	27	25	20	23.8	25	27	22	24.8	28	40	60	40.8		1.01	1	1.1	0.9467	0	0	0		1.7	0.3404	0	0	0
223325_at	TXNDC11	51061	thioredoxin domain containing 11	136	144	144	141.3	140	166	149	150.9	133	129	143	135	242	244	248	244.7		1.07	1	-1	0.9167	0	0	0		1.7	0.0046	1	1	0
217940_s_at	FLJ10769	55739	hypothetical protein FLJ10769	109	129	120	119	114	122	148	127.3	112	127	135	124.3	198	202	219	206		1.07	1	1	0.966	0	0	0		1.7	0.0378	1	1	0
225803_at	FBXO32	114907	F-box protein 32	28	27	30	28.4	30	25	29	27.9	21	24	25	23.1	45	52	51	49.2		-1.02	1	-1.2	0.7503	0	0	0		1.7	0.0395	1	1	0
226711_at	HTLF	3344	human T-cell leukemia virus enhancer factor	301	315	325	313.8	312	252	316	291.9	328	341	313	327.3	514	541	574	542.6		-1.07	1	1	0.9158	0	0	0		1.7	0.0174	1	1	0
207945_s_at	CSNK1D	1453	casein kinase 1, delta	190	218	213	206.6	211	203	242	218.3	173	197	227	197.7	345	348	380	357.1		1.06	1	-1	0.9703	0	0	0		1.7	0.0298	1	1	0
242586_at	MGC45564	405752	GTPase activating Rap/RanGAP domain-like 1	27	21	24	23.8	21	17	24	20.5	18	22	24	21	23	52	59	41.2		-1.16	1	-1.1	0.928	0	0	0		1.7	0.5059	0	0	0
219078_at	GPATC2	55105	G patch domain containing 2	48	53	57	52.5	56	35	49	45.8	55	58	59	57.5	77	97	100	90.6		-1.15	1	1.1	0.8702	0	0	0		1.7	0.0931	1	1	0
202333_s_at	UBE2B	7320	ubiquitin-conjugating enzyme E2B (RAD6 homolog)	475	422	453	449.4	463	403	458	440.7	492	524	491	502.3	758	776	794	775.7		-1.02	1	1.1	0.791	0	0	0		1.7	0.0159	1	1	0
203373_at	SOCS2	8835	suppressor of cytokine signaling 2	39	47	48	44.6	46	38	42	41.8	85	93	82	86.6	68	90	75	77.1		-1.07	1	1.9	0.3815	0	0	0		1.7	0.1098	1	1	0
203149_at	PVRL2	5819	poliovirus receptor-related 2 (herpesvirus entry mediator B)	118	136	131	127.7	125	139	139	134.1	133	122	143	132.5	219	214	229	220.3		1.05	1	1	0.9663	0	0	0		1.7	0.0251	1	1	0
1552326_a_at	CCDC11	220136	coiled-coil domain containing 11	23	22	21	21.8	29	27	23	26	24	23	21	22.7	36	34	44	37.6		1.19	1	1	0.9365	0	0	0		1.7	0.0679	1	1	0
202500_at	DNAJB2	3300	DnaJ (Hsp40) homolog, subfamily B, member 2	42	49	50	46.9	46	61	55	53.7	46	57	56	52.9	73	84	86	80.9		1.14	1	1.1	0.904	0	0	0		1.7	0.058	1	1	0
203927_at	NFKBIE	4794	nuclear factor of kappa light polypeptide gene enhancer in B-cells inhibitor, epsilon	43	40	47	43	43	44	43	43.4	47	44	49	46.6	73	72	77	74		1.01	1	1.1	0.9033	0	0	0		1.7	0.0304	1	1	0
203707_at	ZNF263	10127	zinc finger protein 263	149	157	162	156.1	147	156	171	157.9	147	157	159	154.3	263	260	284	268.7		1.01	1	-1	0.9796	0	0	0		1.7	0.0163	1	1	0
201920_at	SLC20A1	6574	solute carrier family 20 (phosphate transporter), member 1	514	494	510	505.7	521	484	509	504.7	464	456	475	464.8	840	877	895	870.2		-1	1	-1.1	0.5562	0	0	0		1.7	0.0064	1	1	0
213342_at	YAP1	10413	Yes-associated protein 1, 65kDa	96	93	103	97.3	112	67	114	95.1	78	92	95	88	150	178	177	167.5		-1.02	1	-1.1	0.9028	0	0	0		1.7	0.0443	1	1	0
200815_s_at	PAFAH1B1	5048	platelet-activating factor acetylhydrolase, isoform Ib, alpha subunit 45kDa	335	370	352	352.1	344	307	363	337	338	333	346	338.8	606	574	640	605.8		-1.04	1	-1	0.9195	0	0	0		1.7	0.0211	1	1	0
211547_s_at	PAFAH1B1	5048	platelet-activating factor acetylhydrolase, isoform Ib, alpha subunit 45kDa	59	62	59	60	46	42	62	49.2	58	60	56	57.8	89	109	113	103.1		-1.22	1	-1	0.9028	0	0	0		1.7	0.0633	1	1	0
214686_at	ZNF266	10781	zinc finger protein 266	90	104	92	95.2	92	71	102	87.4	96	98	103	98.8	134	185	177	163.8		-1.09	1	1	0.9596	0	0	0		1.7	0.1197	1	1	0
203297_s_at	JARID2	3720	Jumonji, AT rich interactive domain 2	191	196	203	196.6	209	212	218	213.2	231	234	225	230.4	349	342	324	338		1.08	1	1.2	0.4316	0	0	0		1.7	0.0102	1	1	0
208279_s_at	CDRT1	374286	CMT1A duplicated region transcript 1	28	28	27	27.5	31	28	28	29.2	23	28	30	26.7	51	43	48	47.4		1.06	1	-1	0.9772	0	0	0		1.7	0.0297	1	1	0
205205_at	RELB	5971	v-rel reticuloendotheliosis viral oncogene homolog B, nuclear factor of kappa light polypeptide gene enhancer in B-cells 3 (avian)	43	37	43	40.8	39	36	37	37.4	45	42	49	45.5	64	71	76	70.1		-1.09	1	1.1	0.8814	0	0	0		1.7	0.0501	1	1	0
1559051_s_at	C6orf150	115004	chromosome 6 open reading frame 150	25	25	21	23.7	24	25	24	24.3	23	23	19	21.9	34	43	46	40.7		1.03	1	-1.1	0.9451	0	0	0		1.7	0.1134	1	1	0
1557146_a_at	FLJ32252	146336	hypothetical protein FLJ32252	38	44	40	40.5	44	46	51	46.7	41	38	43	40.6	72	86	55	69.6		1.15	1	1	0.9993	0	0	0		1.7	0.1706	0	0	0
222221_x_at	EHD1	10938	EH-domain containing 1	89	91	80	86.3	81	84	88	84.1	88	74	88	83.4	151	138	156	148.1		-1.03	1	-1	0.9704	0	0	0		1.7	0.0342	1	1	0
1562611_at				11	11	11	11	11	10	10	10.4	11	10	11	10.7	14	19	25	18.8		-1.05	1	-1	0.9546	0	0	0		1.7	0.2256	0	0	0
227140_at	INHBA	3624	Inhibin, beta A (activin A, activin AB alpha polypeptide)	14	14	17	14.8	15	15	14	14.5	14	14	15	14.3	21	22	36	25.3		-1.02	1	-1	0.9755	0	0	0		1.7	0.29	0	0	0
223283_s_at	SDCCAG33	10194	serologically defined colon cancer antigen 33	75	86	76	78.9	93	73	107	89.9	114	110	113	112.4	124	143	139	135.2		1.14	1	1.4	0.4052	0	0	0		1.7	0.0415	1	1	0
1553137_s_at	KLF11	8462	Kruppel-like factor 11	20	20	19	19.4	20	19	18	19.1	19	21	21	20	31	39	30	33.3		-1.02	1	1	0.9602	0	0	0		1.7	0.0839	1	1	0
227121_at			MRNA; cDNA DKFZp586K1922 (from clone DKFZp586K1922)	110	100	112	107.1	126	84	133	112	137	129	128	131.2	173	171	209	183.5		1.05	1	1.2	0.5787	0	0	0		1.7	0.0602	1	1	0
211968_s_at	HSPCA	3320	heat shock 90kDa protein 1, alpha	2949	3113	3062	3040.6	2933	3181	3102	3070.3	3359	3507	3393	3419.3	4865	5209	5551	5200.7		1.01	1	1.1	0.5161	0	0	0		1.7	0.0202	1	1	0
236046_at	FLJ44896	401166	FLJ44896 protein	29	28	30	29.2	30	21	28	26.1	25	29	34	28.9	38	53	61	49.9		-1.12	1	-1	0.994	0	0	0		1.7	0.1873	0	0	0
218762_at	ZNF574	64763	zinc finger protein 574	112	123	119	118	109	103	119	110.2	144	127	140	136.7	202	200	203	201.6		-1.07	1	1.2	0.7734	0	0	0		1.7	0.0114	1	1	0
212471_at	KIAA0241	23080	KIAA0241 protein	46	54	58	52.5	52	51	61	54.7	54	51	43	49.2	91	92	86	89.7		1.04	1	-1.1	0.9614	0	0	0		1.7	0.0538	1	1	0
214155_s_at	LARP4	113251	La ribonucleoprotein domain family, member 4	166	122	132	138.8	137	81	135	114.6	142	188	170	165.4	164	273	298	237.1		-1.21	1	1.2	0.904	0	0	0		1.7	0.3357	0	0	0
205409_at	FOSL2	2355	FOS-like antigen 2	49	47	44	46.7	38	46	41	41.8	45	41	53	45.8	74	72	95	79.7		-1.12	1	-1	0.9865	0	0	0		1.7	0.0924	1	1	0
226924_at	LOC400657	400657	hypothetical gene supported by BC036588	52	66	68	61.5	69	39	72	57.9	75	83	86	81.1	73	129	124	105		-1.06	1	1.3	0.7847	0	0	0		1.7	0.3251	0	0	0
209864_at	FRAT2	23401	frequently rearranged in advanced T-cell lymphomas 2	81	82	89	84	87	72	90	82.6	61	77	81	72.5	122	161	151	143.4		-1.02	1	-1.2	0.8926	0	0	0		1.7	0.0848	1	1	0
209944_at	ZNF410	57862	zinc finger protein 410	361	395	394	383	375	307	366	347.8	391	398	383	390.5	649	643	668	653.4		-1.1	1	1	0.9659	0	0	0		1.7	0.0127	1	1	0
201636_at	FXR1	8087	fragile X mental retardation, autosomal homolog 1	222	207	201	209.7	200	169	223	196.1	236	243	233	237.2	287	396	403	357.7		-1.07	1	1.1	0.6847	0	0	0		1.7	0.131	1	1	0
209294_x_at	TNFRSF10B	8795	tumor necrosis factor receptor superfamily, member 10b	94	108	97	99.6	104	103	88	98	92	103	104	99.8	191	158	162	169.8		-1.02	1	1	0.9977	0	0	0		1.7	0.0593	1	1	0
226750_at	LARP2	55132	La ribonucleoprotein domain family, member 2	56	56	53	55	45	44	55	47.9	50	54	57	53.6	80	99	104	93.7		-1.15	1	-1	0.9673	0	0	0		1.7	0.0785	1	1	0
1552644_a_at	PHC3	80012	polyhomeotic like 3 (Drosophila)	31	31	34	32.1	27	31	30	29.2	29	34	34	32.2	36	66	70	54.8		-1.1	1	1	0.9982	0	0	0		1.7	0.3541	0	0	0
204977_at	DDX10	1662	DEAD (Asp-Glu-Ala-Asp) box polypeptide 10	232	289	292	269.2	269	250	260	259.3	254	267	264	261.5	463	472	441	458.6		-1.04	1	-1	0.9777	0	0	0		1.7	0.0677	1	1	0
208790_s_at	PTRF	284119	polymerase I and transcript release factor	114	138	109	119.9	117	130	136	127.4	130	146	146	140.6	200	199	213	203.9		1.06	1	1.2	0.8653	0	0	0		1.7	0.0643	1	1	0
1564053_a_at	YTHDF3	253943	YTH domain family, member 3	98	104	106	102.4	100	60	114	88.2	83	113	106	100	135	184	212	174.1		-1.16	1	-1	0.9855	0	0	0		1.7	0.173	0	0	0
209237_s_at	SLC23A2	9962	solute carrier family 23 (nucleobase transporters), member 2	72	83	81	78.5	75	69	76	73.4	77	79	65	73.4	141	130	130	133.5		-1.07	1	-1.1	0.9477	0	0	0		1.7	0.031	1	1	0
201194_at	SEPW1	6415	selenoprotein W, 1	374	387	370	377	399	361	420	392.7	416	463	447	441.3	635	644	643	640.7		1.04	1	1.2	0.5914	0	0	0		1.7	0.0031	1	1	0
213140_s_at	SS18L1	26039	synovial sarcoma translocation gene on chromosome 18-like 1	77	72	68	72.1	80	59	84	73.5	79	87	92	85.7	87	148	143	122.5		1.02	1	1.2	0.7688	0	0	0		1.7	0.2631	0	0	0
227963_at	FLJ35696	388341	FLJ35696 protein	29	31	34	31.3	27	32	31	29.9	29	33	36	32.4	40	59	65	53.2		-1.05	1	1	0.9742	0	0	0		1.7	0.2255	0	0	0
201173_x_at	NUDC	10726	nuclear distribution gene C homolog (A. nidulans)	509	578	508	530.7	483	537	562	526.2	570	537	554	553.7	1013	842	860	901.8		-1.01	1	1	0.9451	0	0	0		1.7	0.0596	1	1	0
201566_x_at	ID2 /// ID2B	3398 /// 84099	inhibitor of DNA binding 2, dominant negative helix-loop-helix protein /// inhibitor of DNA binding 2B, dominant negative helix-loop-helix protein	273	260	277	269.9	272	224	264	252.2	230	278	289	264.1	351	527	519	458.1		-1.07	1	-1	0.9828	0	0	0		1.7	0.1732	0	0	0
218426_s_at	TRIAD3	54476	TRIAD3 protein	51	57	61	56.4	60	52	57	56.3	72	72	60	67.7	84	105	99	95.8		-1	1	1.2	0.8372	0	0	0		1.7	0.0771	1	1	0
211754_s_at	SLC25A17	10478	solute carrier family 25 (mitochondrial carrier; peroxisomal membrane protein, 34kDa), member 17 /// solute carrier family 25 (mitochondrial carrier; peroxisomal membrane protein, 34kDa), member 17	122	133	134	129.5	131	98	139	121.7	122	115	117	118.1	182	248	235	219.8		-1.06	1	-1.1	0.8099	0	0	0		1.7	0.1073	1	1	0
202912_at	ADM	133	adrenomedullin	634	646	621	633.5	596	576	636	602.3	593	575	564	577.1	1035	1055	1136	1074.8		-1.05	1	-1.1	0.5624	0	0	0		1.7	0.012	1	1	0
200787_s_at	PEA15	8682	phosphoprotein enriched in astrocytes 15	80	89	83	84.1	83	46	85	68.9	81	93	96	89.7	137	139	152	142.6		-1.22	1	1.1	0.9336	0	0	0		1.7	0.0255	1	1	0
236863_at	LOC339210	339210	hypothetical protein LOC339210	40	45	43	42.6	48	42	45	45	42	42	42	41.8	74	79	65	72.2		1.06	1	-1	0.9683	0	0	0		1.7	0.0526	1	1	0
210387_at	HIST1H2BG	8339	histone 1, H2bg	13	13	12	12.8	11	17	15	14	13	16	18	15.5	19	23	24	21.6		1.1	1	1.2	0.8701	0	0	0		1.7	0.0789	1	1	0
211969_at	HSPCA	3320	heat shock 90kDa protein 1, alpha	5238	5088	5268	5197.1	5427	5365	5685	5490.6	6593	6970	6571	6708.9	8658	8905	8846	8802.3		1.06	1	1.3	0.2797	0	0	0		1.7	0.0027	1	1	0
202302_s_at	FLJ11021	65117	similar to splicing factor, arginine/serine-rich 4	546	569	590	568.4	526	522	586	543.7	637	652	604	630.8	887	1033	973	962.5		-1.05	1	1.1	0.7464	0	0	0		1.7	0.0294	1	1	0
202129_s_at	RIOK3	8780	RIO kinase 3 (yeast) /// RIO kinase 3 (yeast)	69	65	60	64.6	64	49	68	59.6	71	65	66	67.4	91	121	119	109.4		-1.08	1	1	0.9494	0	0	0		1.7	0.1101	1	1	0
205004_at	NKRF	55922	NF-kappaB repressing factor	174	156	169	166.3	155	146	167	155.6	169	190	178	178.5	296	280	269	281.3		-1.07	1	1.1	0.9009	0	0	0		1.7	0.0218	1	1	0
201491_at	AHSA1	10598	AHA1, activator of heat shock 90kDa protein ATPase homolog 1 (yeast)	745	797	804	781.5	763	767	796	775.3	873	905	905	894.4	1361	1355	1249	1320.6		-1.01	1	1.1	0.5575	0	0	0		1.7	0.0172	1	1	0
233487_s_at	LRRC8A	56262	leucine rich repeat containing 8 family, member A	70	88	81	79.4	83	77	93	84.4	95	82	87	88.1	134	126	142	134.2		1.06	1	1.1	0.9102	0	0	0		1.7	0.062	1	1	0
236915_at	LOC441054	441054	hypothetical protein LOC441054	15	13	14	14.2	16	15	16	15.7	16	15	15	15.2	20	27	25	24		1.1	1	1.1	0.8926	0	0	0		1.7	0.0935	1	1	0
221904_at	MGC21688	131408	hypothetical protein MGC21688	41	36	41	39.4	36	47	43	41.7	36	44	36	38.4	57	74	70	66.6		1.06	1	-1	0.9796	0	0	0		1.7	0.0883	1	1	0
212264_s_at	KIAA0261	23063	KIAA0261	106	122	123	116.8	115	80	108	99.9	99	111	99	103.3	157	214	228	197.2		-1.17	1	-1.1	0.8619	0	0	0		1.7	0.1553	0	0	0
214290_s_at	HIST2H2AA	8337	histone 2, H2aa	324	369	371	354.1	371	382	377	376.5	333	387	360	359.4	610	615	568	597.3		1.06	1	1	0.9859	0	0	0		1.7	0.0313	1	1	0
213330_s_at	STIP1	10963	stress-induced-phosphoprotein 1 (Hsp70/Hsp90-organizing protein)	730	819	699	747.6	692	742	799	743	865	836	893	864.2	1220	1234	1331	1260.8		-1.01	1	1.2	0.791	0	0	0		1.7	0.0361	1	1	0
203350_at	AP1G1	164	adaptor-related protein complex 1, gamma 1 subunit	146	138	139	141.2	144	137	164	148	130	133	139	134.1	220	250	246	238		1.05	1	-1.1	0.8702	0	0	0		1.7	0.0233	1	1	0
202872_at	ATP6V1C1	528	ATPase, H+ transporting, lysosomal 42kDa, V1 subunit C, isoform 1	141	136	144	140.3	148	100	149	130	146	154	152	150.3	183	280	258	236.5		-1.08	1	1.1	0.7847	0	0	0		1.7	0.1705	0	0	0
201236_s_at	BTG2	7832	BTG family, member 2	96	103	103	100.6	105	80	83	88.4	87	83	94	87.8	149	164	200	169.6		-1.14	1	-1.1	0.7498	0	0	0		1.7	0.0906	1	1	0
226048_at	MAPK8	5599	mitogen-activated protein kinase 8	114	102	114	109.8	100	74	110	93.3	100	111	112	107.6	145	206	212	185		-1.18	1	-1	0.9772	0	0	0		1.7	0.1611	0	0	0
229750_at	POU2F2	5452	POU domain, class 2, transcription factor 2	44	37	33	37.6	43	44	34	40	43	35	31	36.2	72	64	55	63.4		1.06	1	-1	0.9814	0	0	0		1.7	0.1421	1	1	0
225018_at	SPIRE1	56907	spire homolog 1 (Drosophila)	68	80	79	75.8	81	60	79	72.7	89	75	101	87.6	108	140	138	127.8		-1.04	1	1.2	0.9035	0	0	0		1.7	0.1069	1	1	0
202334_s_at	UBE2B	7320	ubiquitin-conjugating enzyme E2B (RAD6 homolog)	203	186	186	191.6	180	164	199	180.3	186	230	205	206.4	260	365	354	322.8		-1.06	1	1.1	0.9288	0	0	0		1.7	0.1302	1	1	0
210405_x_at	TNFRSF10B	8795	tumor necrosis factor receptor superfamily, member 10b	90	104	88	93.4	90	98	84	90.3	84	81	92	85.3	168	159	146	157.3		-1.03	1	-1.1	0.9102	0	0	0		1.7	0.0524	1	1	0
212230_at	PPAP2B	8613	phosphatidic acid phosphatase type 2B	113	120	120	117.7	122	92	123	111.3	138	159	140	145.3	157	210	237	198.1		-1.06	1	1.2	0.6151	0	0	0		1.7	0.1555	0	0	0
225989_at	HERC4	26091	hect domain and RLD 4	109	91	98	99.1	107	74	104	93.8	118	113	114	115	140	180	185	166.9		-1.06	1	1.2	0.7847	0	0	0		1.7	0.1117	1	1	0
221559_s_at	MIS12	79003	MIS12 homolog (yeast)	191	211	227	209.1	194	191	210	198.5	222	243	239	234.3	305	363	394	351.8		-1.05	1	1.1	0.8658	0	0	0		1.7	0.0924	1	1	0
202861_at	PER1	5187	period homolog 1 (Drosophila)	49	40	48	45.7	42	50	48	46.4	40	46	38	41.1	72	74	85	76.8		1.01	1	-1.1	0.9138	0	0	0		1.7	0.0761	1	1	0
225754_at	AP1G1	164	adaptor-related protein complex 1, gamma 1 subunit	89	98	89	92.3	83	64	97	80.1	90	79	100	89.5	103	182	199	154.8		-1.15	1	-1	0.977	0	0	0		1.7	0.3516	0	0	0
205596_s_at	SMURF2	64750	SMAD specific E3 ubiquitin protein ligase 2	237	247	291	257.3	240	230	251	240.2	226	289	230	246.9	372	488	443	431.7		-1.07	1	-1	0.977	0	0	0		1.7	0.1105	1	1	0
211458_s_at	GABARAPL1 /// GABARAPL3	23710 /// 23766	GABA(A) receptor-associated protein like 1 /// GABA(A) receptors associated protein like 3	161	180	169	169.7	158	131	177	154.2	168	175	175	172.7	277	292	285	284.7		-1.1	1	1	0.9703	0	0	0		1.7	0.0166	1	1	0
225582_at	KIAA1754	85450	KIAA1754	68	72	71	70.3	70	65	64	66.4	74	63	69	68.6	126	112	116	117.9		-1.06	1	-1	0.9695	0	0	0		1.7	0.0193	1	1	0
205092_x_at	ZBTB1	22890	zinc finger and BTB domain containing 1	14	15	13	13.8	15	12	13	13.3	16	16	17	16.2	19	28	24	23.1		-1.04	1	1.2	0.6847	0	0	0		1.7	0.1358	1	1	0
206044_s_at	BRAF	673	v-raf murine sarcoma viral oncogene homolog B1	28	28	27	27.5	31	30	22	27.3	32	31	32	31.6	47	49	42	46		-1.01	1	1.1	0.4528	0	0	0		1.7	0.0297	1	1	0
228135_at	C1orf52	148423	chromosome 1 open reading frame 52	99	108	114	106.5	96	79	117	96.1	96	112	107	104.8	155	179	205	178.3		-1.11	1	-1	0.985	0	0	0		1.7	0.0935	1	1	0
208055_s_at	HERC4	26091	hect domain and RLD 4	50	51	44	48.4	52	34	60	47.3	52	55	48	51.4	61	89	97	81		-1.02	1	1.1	0.9346	0	0	0		1.7	0.2155	0	0	0
201381_x_at	CACYBP	27101	calcyclin binding protein	1085	1006	1018	1035.6	1007	999	1057	1020.6	1216	1227	1228	1223.7	1696	1733	1770	1732.7		-1.01	1	1.2	0.4511	0	0	0		1.7	0.0101	1	1	0
212845_at	SAMD4	23034	sterile alpha motif domain containing 4	46	43	47	45.2	40	38	40	39.4	55	51	49	51.8	69	74	84	75.6		-1.15	1	1.1	0.7823	0	0	0		1.7	0.0497	1	1	0
224015_s_at	MRPS25	64432	mitochondrial ribosomal protein S25	41	43	40	41.4	40	31	49	39.2	49	54	43	48.4	54	75	81	69.2		-1.06	1	1.2	0.8532	0	0	0		1.7	0.1702	0	0	0
229946_at	LOC389039	389039	similar to CDNA sequence BC043098	28	34	35	31.9	31	33	36	33.2	33	39	35	35.3	49	57	53	53.3		1.04	1	1.1	0.9229	0	0	0		1.7	0.0766	1	1	0
204937_s_at	ZNF274	10782	zinc finger protein 274	131	134	136	133.6	130	100	137	121.6	132	133	134	132.9	209	228	232	222.8		-1.1	1	-1	0.9774	0	0	0		1.7	0.0168	1	1	0
1564630_at	EDN1	1906	endothelin 1	149	158	157	154.5	162	138	152	150.5	171	169	146	161.4	254	256	264	257.7		-1.03	1	1	0.9542	0	0	0		1.7	0.0078	1	1	0
209357_at	CITED2	10370	Cbp/p300-interacting transactivator, with Glu/Asp-rich carboxy-terminal domain, 2	75	70	78	74.1	85	47	83	69.1	61	82	81	74.2	75	147	171	123.5		-1.07	1	1	0.9993	0	0	0		1.7	0.448	0	0	0
214657_s_at	TncRNA	283131	Trophoblast-derived noncoding RNA	30	29	33	30.8	30	27	33	30.1	31	31	30	30.4	38	58	61	51.4		-1.02	1	-1	0.9807	0	0	0		1.7	0.2267	0	0	0
211527_x_at	VEGF	7422	vascular endothelial growth factor	46	40	39	41.7	41	41	38	40.1	39	44	43	42	57	74	79	69.4		-1.04	1	1	0.9916	0	0	0		1.7	0.1344	1	1	0
227196_at	RHPN2	85415	rhophilin, Rho GTPase binding protein 2	630	602	651	627.4	681	585	687	648.9	456	534	551	511.9	893	1133	1127	1044.9		1.03	1	-1.2	0.7536	0	0	0		1.7	0.0792	1	1	0
1554544_a_at	MBP	4155	myelin basic protein	91	106	102	99.6	99	97	104	99.8	122	111	106	112.8	150	166	183	165.8		1	1	1.1	0.863	0	0	0		1.7	0.07	1	1	0
205383_s_at	ZBTB20	26137	zinc finger and BTB domain containing 20	332	238	307	289.6	346	284	329	318.6	345	316	313	324.5	498	432	519	481.7		1.1	1	1.1	0.9322	0	0	0		1.7	0.1442	1	1	0
226140_s_at	OTUD1	220213	OTU domain containing 1	99	102	97	99.3	97	85	108	96.2	99	95	95	96.5	163	168	165	165.1		-1.03	1	-1	0.903	0	0	0		1.7	0.0041	1	1	0
1553957_at	ZNF564	163050	zinc finger protein 564	36	41	45	40.5	41	40	37	39.3	42	45	40	42.2	53	79	73	67.4		-1.03	1	1	0.9687	0	0	0		1.7	0.1948	0	0	0
204423_at	MKLN1	4289	muskelin 1, intracellular mediator containing kelch motifs	91	99	94	94.8	93	79	99	89.9	87	92	94	91.3	144	159	170	157.4		-1.05	1	-1	0.9239	0	0	0		1.7	0.0352	1	1	0
225295_at	SLC39A10	57181	solute carrier family 39 (zinc transporter), member 10	288	317	340	314.3	265	210	300	255.7	195	216	219	209.8	471	542	556	521.7		-1.23	1	-1.5	0.4528	0	0	0		1.7	0.0617	1	1	0
228736_at	HEL308	113510	DNA helicase HEL308	23	25	27	25.3	23	23	31	25.4	24	31	28	27.6	29	49	51	42		1	1	1.1	0.9361	0	0	0		1.7	0.3111	0	0	0
232864_s_at	AFF4	27125	AF4/FMR2 family, member 4	18	16	16	16.6	18	19	16	17.7	17	15	16	15.9	23	24	37	27.6		1.07	1	-1	0.9589	0	0	0		1.7	0.2372	0	0	0
227793_at				43	39	33	38	39	38	32	36.3	47	45	46	46	66	53	71	63		-1.05	1	1.2	0.8396	0	0	0		1.7	0.1523	0	0	0
204170_s_at	CKS2	1164	CDC28 protein kinase regulatory subunit 2	2450	2531	2472	2483.8	2238	2214	2405	2284.1	2436	2631	2523	2528.3	3812	4294	4268	4118.6		-1.09	1	1	0.9589	0	0	0		1.7	0.0211	1	1	0
225597_at	SLC45A4	57210	solute carrier family 45, member 4	126	158	144	142.3	126	128	133	128.7	102	111	134	114.8	194	229	295	236		-1.11	1	-1.2	0.8546	0	0	0		1.7	0.1962	0	0	0
203730_s_at	ZFP95	23660	zinc finger protein 95 homolog (mouse)	46	50	50	48.6	48	38	50	44.9	52	59	52	54.1	66	90	88	80.5		-1.08	1	1.1	0.8617	0	0	0		1.7	0.127	1	1	0
203167_at	TIMP2	7077	TIMP metallopeptidase inhibitor 2	80	94	96	90	90	85	95	89.7	83	99	101	93.9	153	152	143	149		-1	1	1	0.9703	0	0	0		1.7	0.0479	1	1	0
208398_s_at	TBPL1	9519	TBP-like 1	202	210	216	209.4	207	151	213	187.9	184	214	200	199.2	348	349	342	346.3		-1.11	1	-1.1	0.9356	0	0	0		1.7	0.0061	1	1	0
226250_at			CDNA FLJ34585 fis, clone KIDNE2008758	55	40	57	50.3	67	45	55	55	57	56	60	57.8	78	87	84	83.3		1.09	1	1.1	0.919	0	0	0		1.7	0.1463	1	1	0
212683_at	KIAA0446	9673	KIAA0446 gene product	87	96	106	95.9	100	89	111	99.8	100	111	107	105.6	155	154	166	158.6		1.04	1	1.1	0.9028	0	0	0		1.7	0.049	1	1	0
206038_s_at	NR2C2	7182	nuclear receptor subfamily 2, group C, member 2	20	23	21	21.4	23	23	20	21.7	18	18	19	18.2	33	38	35	35.4		1.01	1	-1.2	0.5521	0	0	0		1.7	0.0271	1	1	0
225212_at	SLC25A25	114789	solute carrier family 25 (mitochondrial carrier; phosphate carrier), member 25	63	73	66	67.2	53	65	63	60	58	62	69	62.8	110	118	105	111		-1.12	1	-1.1	0.9361	0	0	0		1.7	0.038	1	1	0
232125_at			CDNA FLJ34585 fis, clone KIDNE2008758	40	32	36	36.1	36	22	40	31.7	41	39	38	39.2	43	64	76	59.6		-1.14	1	1.1	0.9171	0	0	0		1.7	0.3012	0	0	0
204523_at	ZNF140	7699	zinc finger protein 140 (clone pHZ-39)	71	81	80	77	78	62	81	73.2	70	100	92	86.6	97	142	149	127.2		-1.05	1	1.1	0.9361	0	0	0		1.7	0.2085	0	0	0
218751_s_at	FBXW7	55294	F-box and WD-40 domain protein 7 (archipelago homolog, Drosophila)	58	56	54	56.1	50	55	56	53.5	58	55	59	57.5	86	93	100	92.6		-1.05	1	1	0.942	0	0	0		1.7	0.0298	1	1	0
202693_s_at	STK17A	9263	serine/threonine kinase 17a (apoptosis-inducing)	268	276	304	282.5	253	222	272	248.1	310	358	315	326.9	399	520	488	466		-1.14	1	1.2	0.8261	0	0	0		1.6	0.0942	1	1	0
223650_s_at	NRBF2	29982	nuclear receptor binding factor 2	85	99	96	93.3	91	81	99	90	99	102	106	102.3	143	157	162	153.8		-1.04	1	1.1	0.8853	0	0	0		1.6	0.0502	1	1	0
213793_s_at	HOMER1	9456	homer homolog 1 (Drosophila)	190	181	184	184.9	214	172	200	194.4	271	279	265	271.7	264	306	351	304.9		1.05	1	1.5	0.1014	1	1	0		1.6	0.0862	1	1	0
232092_at	MCART1	92014	mitochondrial carrier triple repeat 1	33	35	46	37.7	34	30	39	34	33	34	40	35.6	58	61	67	62.1		-1.11	1	-1.1	0.9704	0	0	0		1.6	0.1311	1	1	0
202272_s_at	FBXO28	23219	F-box protein 28	226	267	254	248.5	222	205	232	219.4	230	240	230	233.3	391	408	429	409.2		-1.13	1	-1.1	0.9198	0	0	0		1.6	0.0412	1	1	0
223255_at	KIAA1333	55632	KIAA1333	95	102	101	99.4	81	77	112	89	91	121	108	106	135	190	172	163.6		-1.12	1	1.1	0.9569	0	0	0		1.6	0.1255	1	1	0
225618_at	ARHGAP27	201176	Rho GTPase activating protein 27	58	57	59	58.1	51	43	50	48	45	57	54	51.8	96	104	87	95.5		-1.21	1	-1.1	0.8883	0	0	0		1.6	0.0355	1	1	0
1558906_a_at			CDNA clone IMAGE:30343195	19	20	17	18.7	22	19	19	20.2	19	17	19	18.4	32	32	28	30.7		1.08	1	-1	0.9864	0	0	0		1.6	0.0535	1	1	0
220703_at	C10orf110	55853	chromosome 10 open reading frame 110	21	17	21	19.7	21	17	16	17.7	21	22	15	18.8	35	33	30	32.3		-1.11	1	-1	0.9805	0	0	0		1.6	0.1068	1	1	0
209039_x_at	EHD1	10938	EH-domain containing 1	135	148	152	144.9	141	122	133	131.4	139	132	133	134.7	207	259	250	237.6		-1.1	1	-1.1	0.8694	0	0	0		1.6	0.0761	1	1	0
219312_s_at	ZBTB10	65986	zinc finger and BTB domain containing 10	35	32	33	33.5	35	21	33	29.1	31	38	39	35.7	31	73	73	54.9		-1.15	1	1.1	0.952	0	0	0		1.6	0.5147	0	0	0
209927_s_at	C1orf77	26097	chromosome 1 open reading frame 77	46	42	43	43.6	43	66	50	52	39	38	40	39	74	65	76	71.5		1.19	1	-1.1	0.6788	0	0	0		1.6	0.0364	1	1	0
218178_s_at	CHMP1B	57132	chromatin modifying protein 1B	336	378	338	350.1	334	355	354	347.9	317	333	335	328.2	584	564	573	573.5		-1.01	1	-1.1	0.9011	0	0	0		1.6	0.0221	1	1	0
226651_at	HOMER1	9456	homer homolog 1 (Drosophila)	68	63	71	67.2	68	50	73	62.8	91	102	90	94.3	77	132	132	110.1		-1.07	1	1.4	0.4645	0	0	0		1.6	0.3109	0	0	0
234725_s_at	SEMA4B	10509	sema domain, immunoglobulin domain (Ig), transmembrane domain (TM) and short cytoplasmic domain, (semaphorin) 4B	305	348	325	325.5	339	371	365	357.9	312	284	286	293.7	550	516	531	532.4		1.1	1	-1.1	0.8532	0	0	0		1.6	0.0246	1	1	0
223353_at	HCCA2	81532	HCCA2 protein	89	108	112	102.3	98	112	118	108.9	109	109	101	106.1	162	158	182	167.2		1.07	1	1	0.9704	0	0	0		1.6	0.0878	1	1	0
226101_at	PRKCE	5581	protein kinase C, epsilon	39	46	40	41.7	47	40	56	47.1	58	53	54	54.9	70	60	75	68.1		1.13	1	1.3	0.5916	0	0	0		1.6	0.0862	1	1	0
219326_s_at	B3GNT1	10678	UDP-GlcNAc:betaGal beta-1,3-N-acetylglucosaminyltransferase 1	64	80	87	76.5	68	72	82	73.9	69	93	87	82.5	111	124	142	125.1		-1.04	1	1.1	0.966	0	0	0		1.6	0.1494	1	1	0
211668_s_at	PLAU	5328	plasminogen activator, urokinase /// plasminogen activator, urokinase	50	63	65	59.1	68	68	63	66.4	52	56	68	58.5	91	99	100	96.5		1.12	1	-1	0.9937	0	0	0		1.6	0.0924	1	1	0
213331_s_at	NEK1	4750	NIMA (never in mitosis gene a)-related kinase 1	27	30	31	29.3	35	31	35	33.3	30	35	36	33.6	35	53	59	48		1.14	1	1.1	0.854	0	0	0		1.6	0.2616	0	0	0
225381_at	LOC399959	399959	hypothetical gene supported by BX647608	24	24	22	23.3	26	22	26	24.5	27	27	26	27	30	40	47	38.1		1.05	1	1.2	0.6849	0	0	0		1.6	0.2153	0	0	0
238725_at			Transcribed locus, weakly similar to XP_496299.1 PREDICTED: hypothetical protein LOC148206 [Homo sapiens]	62	57	61	59.9	61	59	57	58.8	59	65	68	63.9	90	107	97	97.9		-1.02	1	1.1	0.9062	0	0	0		1.6	0.0417	1	1	0
218987_at	ATF7IP	55729	activating transcription factor 7 interacting protein	82	99	103	94.5	87	72	98	85	78	92	88	85.5	134	163	168	154.1		-1.11	1	-1.1	0.9247	0	0	0		1.6	0.1196	1	1	0
1554807_a_at	SPIRE1	56907	spire homolog 1 (Drosophila)	41	41	44	42	45	38	45	42.2	51	48	52	50.5	62	69	75	68.5		1.01	1	1.2	0.5161	0	0	0		1.6	0.0516	1	1	0
227693_at	WDR20	91833	WD repeat domain 20	77	82	83	80.8	81	59	80	72.5	72	83	88	80.9	107	139	153	131.7		-1.11	1	1	0.9993	0	0	0		1.6	0.1382	1	1	0
218012_at	TSPYL2	64061	TSPY-like 2	101	108	112	106.8	115	118	112	114.9	108	111	113	110.7	200	158	167	174.2		1.08	1	1	0.9298	0	0	0		1.6	0.0777	1	1	0
204652_s_at	NRF1	4899	nuclear respiratory factor 1	46	51	49	48.5	43	43	47	44.4	40	50	50	46.6	68	83	87	79		-1.09	1	-1	0.9703	0	0	0		1.6	0.0859	1	1	0
1561915_at			CDNA clone IMAGE:5278237	23	19	17	19.8	20	21	17	19.4	21	20	20	20.2	27	38	32	32.3		-1.02	1	1	0.9842	0	0	0		1.6	0.1744	0	0	0
233057_at	HSPB8	26353	heat shock 22kDa protein 8	20	18	19	19.1	19	22	20	20.2	20	19	17	18.7	29	28	37	31.1		1.06	1	-1	0.98	0	0	0		1.6	0.1009	1	1	0
237204_at	DPH2L1	1801	Candidate tumor suppressor in ovarian cancer 2	20	21	20	20.5	21	24	22	22.1	25	19	19	20.6	40	35	26	33.3		1.08	1	1	0.9931	0	0	0		1.6	0.175	0	0	0
215071_s_at	HIST1H2AC	8334	histone 1, H2ac	151	155	166	157.2	185	153	192	175.6	149	169	159	159	245	268	254	255.8		1.12	1	1	0.9855	0	0	0		1.6	0.0211	1	1	0
208952_s_at	LARP5	23185	La ribonucleoprotein domain family, member 5	139	158	149	148.5	138	130	150	138.9	161	158	157	158.8	234	234	257	241.7		-1.07	1	1.1	0.8823	0	0	0		1.6	0.0335	1	1	0
217999_s_at			CDNA clone IMAGE:5531727	48	48	50	48.6	54	57	55	55.4	70	76	75	73.4	64	88	88	79		1.14	1	1.5	0.2244	0	0	0		1.6	0.1344	1	1	0
202628_s_at	SERPINE1	5054	serpin peptidase inhibitor, clade E (nexin, plasminogen activator inhibitor type 1), member 1	147	161	158	155	127	129	157	136.9	127	113	135	124.6	214	251	299	252.1		-1.13	1	-1.2	0.6967	0	0	0		1.6	0.1237	1	1	0
205327_s_at	ACVR2A	92	activin A receptor, type IIA	62	63	65	63.3	62	56	66	61.3	74	58	61	63.8	100	108	101	102.9		-1.03	1	1	0.9927	0	0	0		1.6	0.0145	1	1	0
240633_at	FLJ33718	285489	hypothetical protein FLJ33718	26	29	26	27.3	29	32	27	28.9	34	37	36	35.7	35	50	49	44.3		1.06	1	1.3	0.4528	0	0	0		1.6	0.1596	0	0	0
221873_at	ZNF143	7702	zinc finger protein 143 (clone pHZ-1)	99	107	97	100.8	97	76	105	91.7	80	77	82	79.6	122	192	187	163.6		-1.1	1	-1.3	0.4554	0	0	0		1.6	0.2404	0	0	0
229174_at				139	140	144	141.2	133	108	146	128.1	135	174	167	157.8	167	266	272	229.3		-1.1	1	1.1	0.904	0	0	0		1.6	0.263	0	0	0
224836_at	TP53INP2	58476	tumor protein p53 inducible nuclear protein 2	139	153	139	143.7	151	121	142	137.1	163	153	132	148.8	210	248	244	233.4		-1.05	1	1	0.9708	0	0	0		1.6	0.0524	1	1	0
223450_s_at	COG3	83548	component of oligomeric golgi complex 3	50	52	57	52.9	58	36	69	52.7	55	61	63	59.9	70	90	100	85.8		-1	1	1.1	0.8403	0	0	0		1.6	0.1544	0	0	0
230311_s_at	PRDM6	93166	PR domain containing 6	51	54	45	49.8	52	50	49	50.2	61	55	63	59.7	72	88	83	80.8		1.01	1	1.2	0.7979	0	0	0		1.6	0.0832	1	1	0
236741_at	WDR72	256764	WD repeat domain 72	63	66	67	65.2	62	87	75	74	67	75	73	71.4	94	108	116	105.7		1.14	1	1.1	0.8127	0	0	0		1.6	0.0554	1	1	0
207145_at	GDF8	2660	growth differentiation factor 8	9	9	9	9.3	11	10	9	10	9	10	10	9.7	12	13	22	15.1		1.07	1	1	0.8937	0	0	0		1.6	0.3109	0	0	0
219774_at	FLJ10996	54520	hypothetical protein FLJ10996	31	30	28	29.6	28	24	28	26.8	30	32	30	30.5	46	47	51	48		-1.11	1	1	0.9542	0	0	0		1.6	0.0193	1	1	0
211015_s_at	HSPA4	3308	heat shock 70kDa protein 4	639	680	669	662.2	658	618	684	652.6	714	766	714	730.8	1009	1138	1077	1073.3		-1.01	1	1.1	0.7385	0	0	0		1.6	0.0225	1	1	0
212227_x_at	EIF1	10209	eukaryotic translation initiation factor 1	2760	2903	2937	2865.6	2857	2980	2908	2914.6	3168	2964	3053	3060.5	4972	4404	4572	4643		1.02	1	1.1	0.827	0	0	0		1.6	0.0236	1	1	0
214553_s_at	ARPP-19	10776	cyclic AMP phosphoprotein, 19 kD	151	142	131	141.1	131	109	152	129.8	141	141	140	140.9	193	248	249	228.6		-1.09	1	-1	0.9969	0	0	0		1.6	0.1117	1	1	0
202402_s_at	CARS	833	cysteinyl-tRNA synthetase	89	112	111	103.3	102	113	117	110.3	102	114	109	108.1	143	181	181	167.2		1.07	1	1	0.9683	0	0	0		1.6	0.1457	1	1	0
207528_s_at	SLC7A11	23657	solute carrier family 7, (cationic amino acid transporter, y+ system) member 11	110	110	109	109.8	101	88	122	102.8	98	101	115	104.5	163	184	187	177.8		-1.07	1	-1.1	0.9348	0	0	0		1.6	0.0287	1	1	0
210180_s_at	SFRS10	6434	splicing factor, arginine/serine-rich 10 (transformer 2 homolog, Drosophila)	60	55	58	57.5	52	58	57	55.7	57	60	61	59.4	85	95	99	93		-1.03	1	1	0.9451	0	0	0		1.6	0.038	1	1	0
238542_at	ULBP2	80328	UL16 binding protein 2	30	36	32	32.3	33	28	36	32	34	34	37	35	42	55	62	52.3		-1.01	1	1.1	0.9051	0	0	0		1.6	0.1779	0	0	0
221998_s_at	VRK3	51231	vaccinia related kinase 3	151	199	177	174.7	177	206	196	192.9	205	185	211	200	271	281	296	282.5		1.1	1	1.1	0.9027	0	0	0		1.6	0.0934	1	1	0
202627_s_at	SERPINE1	5054	serpin peptidase inhibitor, clade E (nexin, plasminogen activator inhibitor type 1), member 1	113	139	122	123.8	120	106	115	113.5	124	115	119	119.3	180	193	232	200.3		-1.09	1	-1	0.966	0	0	0		1.6	0.1173	1	1	0
242224_at	GPATC2	55105	G patch domain containing 2	47	42	40	42.9	41	27	49	38	40	42	45	42.5	50	86	77	69.4		-1.13	1	-1	0.9897	0	0	0		1.6	0.3068	0	0	0
33322_i_at	SFN	2810	stratifin	1145	1270	1264	1225	1052	1098	1183	1110	1083	1022	1061	1055.1	2116	1866	1965	1979.6		-1.1	1	-1.2	0.665	0	0	0		1.6	0.0358	1	1	0
209288_s_at	CDC42EP3	10602	CDC42 effector protein (Rho GTPase binding) 3	105	111	109	108.4	113	66	99	90.4	100	107	129	111.6	146	194	190	175.1		-1.2	1	1	0.9787	0	0	0		1.6	0.1098	1	1	0
208869_s_at	GABARAPL1	23710	GABA(A) receptor-associated protein like 1	81	82	85	82.6	77	51	76	66.7	80	89	80	82.9	108	148	149	133.5		-1.24	1	1	0.9927	0	0	0		1.6	0.1439	1	1	0
225217_s_at	BRPF3	27154	bromodomain and PHD finger containing, 3	36	47	40	40.7	44	33	52	42.1	45	50	45	46.6	42	83	82	65.8		1.03	1	1.1	0.8975	0	0	0		1.6	0.4466	0	0	0
233376_at			G protein interaction factor 2-like mRNA sequence	31	30	29	30.1	32	24	27	27.3	29	29	30	29.4	40	44	66	48.5		-1.1	1	-1	0.9261	0	0	0		1.6	0.2674	0	0	0
201845_s_at	RYBP	23429	RING1 and YY1 binding protein	192	170	181	180.5	182	137	177	163.9	171	196	191	185.6	270	307	297	291		-1.1	1	1	0.9703	0	0	0		1.6	0.0381	1	1	0
212130_x_at	EIF1	10209	eukaryotic translation initiation factor 1	2045	2129	2052	2075	2084	2085	2124	2097.5	2330	2116	2219	2219.8	3567	3164	3317	3345.4		1.01	1	1.1	0.8434	0	0	0		1.6	0.0205	1	1	0
226275_at	MXD1	4084	MAX dimerization protein 1	36	37	39	37.1	42	28	40	36.1	44	47	40	43.7	42	62	83	59.8		-1.03	1	1.2	0.7496	0	0	0		1.6	0.3666	0	0	0
219878_s_at	KLF13	51621	Kruppel-like factor 13	103	105	106	104.6	100	94	118	103.5	99	117	103	105.9	147	185	176	168.4		-1.01	1	1	0.9855	0	0	0		1.6	0.07	1	1	0
218912_at	GCC1	79571	GRIP and coiled-coil domain containing 1	109	115	112	112.1	113	116	118	115.5	91	113	110	104.2	171	182	188	180.3		1.03	1	-1.1	0.9361	0	0	0		1.6	0.0148	1	1	0
213685_at	TCEB3	6924	Transcription elongation factor B (SIII), polypeptide 3 (110kDa, elongin A)	33	38	39	36.6	38	26	40	34.2	35	37	41	37.5	57	57	63	58.8		-1.07	1	1	0.9782	0	0	0		1.6	0.0524	1	1	0
214583_at	RSC1A1	6248	regulatory solute carrier protein, family 1, member 1	25	24	28	25.6	23	17	28	22.5	21	24	29	24.2	29	43	57	41.2		-1.14	1	-1.1	0.9703	0	0	0		1.6	0.3817	0	0	0
1567214_a_at	PNN	5411	pinin, desmosome associated protein	192	195	179	188.3	182	169	211	186.3	203	196	232	209.8	241	324	355	302.7		-1.01	1	1.1	0.8702	0	0	0		1.6	0.1688	0	0	0
224753_at	CDCA5	113130	cell division cycle associated 5	225	241	236	234.1	231	193	234	218.8	259	228	249	245.1	381	367	381	376.3		-1.07	1	1	0.9322	0	0	0		1.6	0.0095	1	1	0
219017_at	ETNK1	55500	ethanolamine kinase 1	228	218	221	222.1	213	174	224	202.7	221	227	217	221.3	321	384	370	356.9		-1.1	1	-1	0.9888	0	0	0		1.6	0.0457	1	1	0
217196_s_at	CAMSAP1L1	23271	calmodulin regulated spectrin-associated protein 1-like 1	141	145	139	141.4	130	101	151	125.8	148	146	139	144.2	192	259	236	227.3		-1.12	1	1	0.9511	0	0	0		1.6	0.1034	1	1	0
222572_at	PPM2C	54704	protein phosphatase 2C, magnesium-dependent, catalytic subunit	66	60	70	65	71	55	65	63.1	48	65	59	57	82	124	111	104.4		-1.03	1	-1.1	0.9102	0	0	0		1.6	0.201	0	0	0
208112_x_at	EHD1	10938	EH-domain containing 1	145	136	137	139.3	138	120	127	127.9	148	122	127	131.8	231	239	202	223.5		-1.09	1	-1.1	0.9477	0	0	0		1.6	0.0461	1	1	0
214760_at	ZNF337	26152	zinc finger protein 337	130	115	121	121.7	126	105	123	117.6	136	136	127	132.9	188	191	207	195.2		-1.03	1	1.1	0.8477	0	0	0		1.6	0.0297	1	1	0
1568611_at	P4HA2	8974	Procollagen-proline, 2-oxoglutarate 4-dioxygenase (proline 4-hydroxylase), alpha polypeptide II	46	49	37	43.5	53	37	47	45.1	53	57	52	54.3	66	65	79	69.7		1.04	1	1.2	0.827	0	0	0		1.6	0.1457	1	1	0
213372_at	PAQR3	152559	progestin and adipoQ receptor family member III	78	80	90	82.5	84	48	87	70.3	85	95	90	90.1	100	156	148	132.3		-1.17	1	1.1	0.8915	0	0	0		1.6	0.2384	0	0	0
212188_at	KCTD12	115207	potassium channel tetramerisation domain containing 12 /// potassium channel tetramerisation domain containing 12	24	30	32	28.4	25	25	28	25.9	36	35	31	33.9	38	45	55	45.5		-1.09	1	1.2	0.8702	0	0	0		1.6	0.2237	0	0	0
227093_at	USP36	57602	Ubiquitin specific peptidase 36	109	135	136	126	118	97	131	114.6	142	132	126	133.3	182	198	228	201.9		-1.1	1	1.1	0.9607	0	0	0		1.6	0.1234	1	1	0
208980_s_at	UBC	7316	ubiquitin C	3878	3817	3831	3841.9	3859	3772	3920	3850	3572	3672	3709	3650.5	5488	6435	6606	6155.9		1	1	-1.1	0.6331	0	0	0		1.6	0.0494	1	1	0
213145_at	FBXL14	144699	F-box and leucine-rich repeat protein 14	206	240	230	224.8	231	205	247	227.4	269	291	275	278.5	326	378	378	360		1.01	1	1.2	0.623	0	0	0		1.6	0.063	1	1	0
230281_at	C16orf46	123775	chromosome 16 open reading frame 46	42	43	37	40.8	46	39	51	44.8	41	47	48	45.6	47	72	82	65.3		1.1	1	1.1	0.8897	0	0	0		1.6	0.3111	0	0	0
230383_x_at			Transcribed locus	34	38	34	35.4	39	37	39	38.3	36	36	35	35.6	54	65	51	56.6		1.08	1	1	0.9882	0	0	0		1.6	0.09	1	1	0
208868_s_at	GABARAPL1	23710	GABA(A) receptor-associated protein like 1	72	71	65	69.3	58	65	72	64.6	79	74	60	70.5	106	110	118	111		-1.07	1	1	0.9893	0	0	0		1.6	0.0267	1	1	0
220924_s_at	SLC38A2	54407	solute carrier family 38, member 2	1413	1387	1399	1399.3	1513	1486	1511	1503.6	2103	1910	1841	1947.9	2438	2151	2139	2238.6		1.07	1	1.4	0.3984	0	0	0		1.6	0.0278	1	1	0
205476_at	CCL20	6364	chemokine (C-C motif) ligand 20	14	16	14	14.7	15	13	15	14.3	18	15	16	16.1	22	28	21	23.5		-1.03	1	1.1	0.9231	0	0	0		1.6	0.1211	1	1	0
202021_x_at	EIF1	10209	eukaryotic translation initiation factor 1	2113	2209	2195	2171.8	2141	2213	2212	2188.3	2421	2181	2317	2304.5	3619	3398	3406	3472.7		1.01	1	1.1	0.8796	0	0	0		1.6	0.0103	1	1	0
204268_at	S100A2	6273	S100 calcium binding protein A2	46	39	38	40.6	44	31	46	39.6	39	47	41	42.2	62	62	71	65		-1.03	1	1	0.972	0	0	0		1.6	0.0781	1	1	0
229310_at	KBTBD9	114818	kelch repeat and BTB (POZ) domain containing 9	34	48	41	40.8	42	35	40	38.8	45	55	49	49.3	48	65	89	65.2		-1.05	1	1.2	0.8897	0	0	0		1.6	0.372	0	0	0
214993_at	LOC253982	253982	hypothetical protein LOC253982	58	74	81	70.1	62	63	93	71	63	73	74	69.5	134	110	95	111.9		1.01	1	-1	0.9956	0	0	0		1.6	0.2339	0	0	0
209744_x_at	ITCH	83737	itchy homolog E3 ubiquitin protein ligase (mouse)	84	100	96	93	85	67	86	79.1	80	82	93	84.6	135	159	153	148.5		-1.18	1	-1.1	0.9122	0	0	0		1.6	0.0761	1	1	0
239794_at	IARS	3376	Isoleucine-tRNA synthetase	50	41	43	44.3	45	36	44	41.6	39	53	46	45.9	61	63	92	70.8		-1.07	1	1	0.9796	0	0	0		1.6	0.242	0	0	0
206928_at	ZNF124	7678	zinc finger protein 124 (HZF-16)	73	79	81	77.6	69	75	80	74.5	71	94	82	82	103	147	127	124		-1.04	1	1.1	0.9637	0	0	0		1.6	0.1497	1	1	0
202695_s_at	STK17A	9263	serine/threonine kinase 17a (apoptosis-inducing)	50	48	49	48.9	51	54	59	54.4	65	69	67	66.9	66	82	88	78.1		1.11	1	1.4	0.2244	0	0	0		1.6	0.1111	1	1	0
240176_at		391426	Similar to ENSANGP00000004103	25	22	22	23	23	25	21	23	27	20	21	22.6	35	35	40	36.7		1	1	-1	0.9886	0	0	0		1.6	0.07	1	1	0
208706_s_at	EIF5	1983	eukaryotic translation initiation factor 5	566	547	559	557.3	567	518	585	555.9	629	676	645	649.7	817	922	934	889.6		-1	1	1.2	0.4568	0	0	0		1.6	0.0291	1	1	0
233081_at	C5orf18	7905	Chromosome 5 open reading frame 18	19	18	19	18.5	20	17	17	18.1	21	18	18	18.8	24	28	38	29.5		-1.02	1	1	0.9789	0	0	0		1.6	0.2257	0	0	0
202760_s_at	AKAP2 /// PALM2-AKAP2	11217 /// 445815	A kinase (PRKA) anchor protein 2 /// PALM2-AKAP2 protein	66	77	82	75	64	49	79	62.9	85	95	80	86.1	106	115	141	119.6		-1.19	1	1.1	0.8879	0	0	0		1.6	0.1437	1	1	0
220933_s_at	ZCCHC6	79670	zinc finger, CCHC domain containing 6	119	122	134	124.6	130	112	133	124.7	130	135	124	129.6	195	197	204	198.7		1	1	1	0.9444	0	0	0		1.6	0.0221	1	1	0
215046_at	FLJ23861	151050	hypothetical protein FLJ23861	12	11	15	12.6	13	12	14	12.9	13	12	11	12.1	15	23	24	20.1		1.02	1	-1	0.98	0	0	0		1.6	0.3478	0	0	0
218474_s_at	KCTD5	54442	potassium channel tetramerisation domain containing 5	98	99	111	102.5	110	88	116	104	114	113	116	114.5	151	172	168	163.5		1.01	1	1.1	0.8059	0	0	0		1.6	0.0516	1	1	0
228482_at	NBLA10383	284040	putative protein product of Nbla10383	44	43	41	42.7	53	39	47	46.3	49	50	53	50.8	51	80	78	68.1		1.08	1	1.2	0.5352	0	0	0		1.6	0.2418	0	0	0
201574_at	ETF1	2107	eukaryotic translation termination factor 1	812	806	816	811.3	852	818	853	840.9	821	802	845	822.5	1329	1252	1298	1292.8		1.04	1	1	0.9476	0	0	0		1.6	0.0053	1	1	0
223594_at	DKFZp434K2435	84216	hypothetical protein DKFZp434K2435	53	58	59	57	68	49	61	59.1	65	70	66	66.9	82	101	91	90.7		1.04	1	1.2	0.6552	0	0	0		1.6	0.069	1	1	0
227025_at	PPHLN1	51535	periphilin 1	41	44	39	41	37	29	48	37.2	39	37	42	39.3	48	73	79	65.2		-1.1	1	-1	0.9504	0	0	0		1.6	0.2794	0	0	0
212036_s_at	PNN	5411	pinin, desmosome associated protein	452	429	433	437.9	412	389	476	424.3	483	485	485	484.6	700	722	669	696.7		-1.03	1	1.1	0.4716	0	0	0		1.6	0.0121	1	1	0
219548_at	ZNF16	7564	zinc finger protein 16 (KOX 9)	51	62	54	55.6	57	53	55	55.1	61	77	69	68.7	83	88	95	88.5		-1.01	1	1.2	0.826	0	0	0		1.6	0.0664	1	1	0
221482_s_at	ARPP-19	10776	cyclic AMP phosphoprotein, 19 kD	461	442	461	454.7	450	350	457	415.9	402	443	472	438.2	639	760	780	723.4		-1.09	1	-1	0.957	0	0	0		1.6	0.061	1	1	0
210561_s_at	WSB1	26118	WD repeat and SOCS box-containing 1	361	372	374	369.3	369	345	423	377.6	489	452	480	473.6	508	590	676	587.5		1.02	1	1.3	0.3348	0	0	0		1.6	0.0961	1	1	0
207227_x_at	RFPL2	10739	ret finger protein-like 2	33	26	30	29.4	32	25	29	28.5	39	34	32	34.9	41	60	42	46.8		-1.03	1	1.2	0.8715	0	0	0		1.6	0.2325	0	0	0
202871_at	TRAF4	9618	TNF receptor-associated factor 4	64	65	67	65.3	53	58	72	60.3	59	66	67	63.9	108	102	101	103.7		-1.08	1	-1	0.9703	0	0	0		1.6	0.0114	1	1	0
226949_at	GOLGA3	2802	golgi autoantigen, golgin subfamily a, 3	88	87	77	83.5	82	63	81	74.7	79	83	75	79.1	131	118	150	132.5		-1.12	1	-1.1	0.9369	0	0	0		1.6	0.0952	1	1	0
210971_s_at	ARNTL	406	aryl hydrocarbon receptor nuclear translocator-like	31	40	43	37.8	41	38	44	41.2	38	42	39	39.7	44	71	68	59.9		1.09	1	1.1	0.9731	0	0	0		1.6	0.3378	0	0	0
219361_s_at	ISG20L1	64782	interferon stimulated exonuclease gene 20kDa-like 1	124	142	158	140.6	129	122	147	131.9	135	135	146	138.4	221	215	233	223		-1.07	1	-1	0.9871	0	0	0		1.6	0.079	1	1	0
224956_at	182-FIP	57532	82-kD FMRP Interacting Protein	198	197	199	198	190	157	191	178.7	237	251	253	247.2	289	323	332	313.9		-1.11	1	1.2	0.2797	0	0	0		1.6	0.0284	1	1	0
219475_at	OKL38	29948	pregnancy-induced growth inhibitor	73	72	69	71.1	62	57	75	64.1	69	66	64	66.6	112	100	129	112.7		-1.11	1	-1.1	0.8372	0	0	0		1.6	0.084	1	1	0
1558845_at	PARD6G	84552	Par-6 partitioning defective 6 homolog gamma (C. elegans)	16	17	17	16.5	15	17	15	15.8	18	16	15	16.6	31	22	26	26.1		-1.04	1	1	0.9926	0	0	0		1.6	0.1225	1	1	0
221988_at	MGC2747	79086	Hypothetical protein MGC2747	35	31	38	34.7	39	28	36	34.1	34	33	35	33.9	42	61	65	55		-1.02	1	-1	0.9769	0	0	0		1.6	0.2621	0	0	0
201783_s_at	RELA	5970	v-rel reticuloendotheliosis viral oncogene homolog A, nuclear factor of kappa light polypeptide gene enhancer in B-cells 3, p65 (avian)	151	184	181	171.3	182	170	176	175.8	160	176	175	170.1	276	262	276	271.3		1.03	1	-1	0.993	0	0	0		1.6	0.0638	1	1	0
227345_at	TNFRSF10D	8793	tumor necrosis factor receptor superfamily, member 10d, decoy with truncated death domain	91	98	102	96.9	95	93	104	97.1	73	86	84	80.6	133	155	176	153.5		1	1	-1.2	0.771	0	0	0		1.6	0.106	1	1	0
223096_at	NOP5/NOP58	51602	nucleolar protein NOP5/NOP58	1269	1141	1274	1226.4	1218	1124	1253	1197	1156	1314	1260	1241.6	1736	2092	2017	1942.1		-1.02	1	1	0.986	0	0	0		1.6	0.0685	1	1	0
210188_at	GABPA	2551	GA binding protein transcription factor, alpha subunit 60kDa	29	32	25	28.8	31	25	34	29.5	31	34	29	31.5	45	43	49	45.6		1.03	1	1.1	0.9364	0	0	0		1.6	0.0967	1	1	0
218041_x_at	SLC38A2	54407	solute carrier family 38, member 2	1462	1462	1485	1469.7	1600	1574	1640	1604.7	2139	2006	1878	2005.2	2438	2240	2303	2325.8		1.09	1	1.4	0.3987	0	0	0		1.6	0.0114	1	1	0
203889_at	SGNE1	6447	secretory granule, neuroendocrine protein 1 (7B2 protein)	28	22	27	25.3	22	28	25	24.9	21	23	26	23.3	33	45	44	40.1		-1.02	1	-1.1	0.9505	0	0	0		1.6	0.1915	0	0	0
212944_at	MRPS6	64968	Mitochondrial ribosomal protein S6	73	76	79	76.1	80	50	77	67.6	95	119	110	107.5	98	136	131	120.3		-1.13	1	1.4	0.5787	0	0	0		1.6	0.1502	0	0	0
219421_at	OSRF	23548	osmosis responsive factor	51	61	64	58.5	63	42	65	55.6	55	66	62	60.7	71	100	111	92.4		-1.05	1	1	0.9752	0	0	0		1.6	0.2609	0	0	0
225749_at	LOC283951	283951	hypothetical protein LOC283951	137	134	145	138.7	130	116	148	130.3	139	145	145	143.3	233	211	214	219		-1.06	1	1	0.9185	0	0	0		1.6	0.0236	1	1	0
1561759_at			Full length insert cDNA clone YU26H08	12	13	15	13.3	13	20	17	16.6	15	14	16	14.7	22	20	20	21		1.25	1	1.1	0.9138	0	0	0		1.6	0.0957	1	1	0
227866_at	RBM16	22828	RNA binding motif protein 16	25	22	25	23.8	26	16	20	20.5	22	22	27	23.8	29	44	42	37.6		-1.16	1	1	0.9996	0	0	0		1.6	0.2242	0	0	0
230171_at	UBE2D3	7323	Threonine synthase, chloroplast	43	56	38	45.2	47	62	43	50	47	49	48	48	70	80	65	71.4		1.1	1	1.1	0.9692	0	0	0		1.6	0.2013	0	0	0
214192_at	RABEP1	9135	Rabaptin, RAB GTPase binding effector protein 1	24	27	25	25.4	25	28	25	25.9	24	24	23	23.9	42	40	38	40.1		1.02	1	-1.1	0.9102	0	0	0		1.6	0.038	1	1	0
225464_at	FRMD6	122786	FERM domain containing 6	71	92	92	84.4	74	75	93	80.1	86	93	81	86.7	121	127	154	133.2		-1.05	1	1	0.9839	0	0	0		1.6	0.1612	0	0	0
208370_s_at	DSCR1	1827	Down syndrome critical region gene 1	76	96	88	86.4	84	55	97	76.6	84	102	93	93	120	137	154	136.2		-1.13	1	1.1	0.9521	0	0	0		1.6	0.1338	1	1	0
232352_at	ISL2	64843	ISL2 transcription factor, LIM/homeodomain, (islet-2)	34	39	36	36.4	33	45	39	38.6	28	36	30	31.1	57	58	57	57.3		1.06	1	-1.2	0.8712	0	0	0		1.6	0.022	1	1	0
223256_at	KIAA1333	55632	KIAA1333	162	149	169	159.9	153	130	162	147.7	180	179	180	179.4	229	279	250	251.9		-1.08	1	1.1	0.7753	0	0	0		1.6	0.0715	1	1	0
217893_s_at	C1orf108	79647	chromosome 1 open reading frame 108	176	177	189	180.4	185	159	172	171.8	181	179	202	187.1	265	289	298	283.9		-1.05	1	1	0.9536	0	0	0		1.6	0.0285	1	1	0
226859_at	bA16L21.2.1	548645	DnaJ-like protein	69	80	83	76.7	62	47	71	59.1	75	76	69	73.5	109	126	129	120.7		-1.3	1	-1	0.9622	0	0	0		1.6	0.0901	1	1	0
213156_at			MRNA; cDNA DKFZp586B211 (from clone DKFZp586B211)	82	63	68	70.5	78	50	93	71.4	82	87	84	84.4	85	113	142	110.9		1.01	1	1.2	0.8396	0	0	0		1.6	0.3111	0	0	0
219904_at	ZSCAN5	79149	zinc finger and SCAN domain containing 5	51	57	52	52.9	55	43	50	49.3	55	55	55	55.1	78	84	89	83.3		-1.07	1	1	0.9315	0	0	0		1.6	0.0446	1	1	0
230127_at			Transcribed locus	12	13	15	13.3	16	11	13	13.2	14	15	17	15.3	17	24	23	20.9		-1	1	1.2	0.8662	0	0	0		1.6	0.2021	0	0	0
200632_s_at	NDRG1	10397	N-myc downstream regulated gene 1	437	464	452	451	463	520	493	491.3	452	453	465	456.7	680	733	715	708.7		1.09	1	1	0.9637	0	0	0		1.6	0.0138	1	1	0
219284_at	HSPBAP1	79663	HSPB (heat shock 27kDa) associated protein 1	42	43	53	45.6	50	33	51	43.9	53	49	52	51.2	57	76	84	71.6		-1.04	1	1.1	0.9017	0	0	0		1.6	0.2264	0	0	0
229800_at	DCAMKL1	9201	Doublecortin and CaM kinase-like 1	10	12	12	11.3	13	10	13	11.7	14	13	11	13.1	17	19	18	17.7		1.04	1	1.2	0.8772	0	0	0		1.6	0.0412	1	1	0
209326_at	SLC35A2	7355	solute carrier family 35 (UDP-galactose transporter), member A2	140	152	147	146.3	131	149	157	145.1	143	160	153	151.6	229	231	230	229.9		-1.01	1	1	0.9491	0	0	0		1.6	0.0114	1	1	0
208815_x_at	HSPA4	3308	heat shock 70kDa protein 4	1133	1188	1141	1153.5	1177	1116	1271	1186.1	1297	1332	1275	1301.1	1876	1740	1822	1811.9		1.03	1	1.1	0.4872	0	0	0		1.6	0.012	1	1	0
205088_at	CXorf6	10046	chromosome X open reading frame 6	58	69	73	66.2	69	61	67	65.6	72	84	80	78.6	98	103	111	104		-1.01	1	1.2	0.8552	0	0	0		1.6	0.0909	1	1	0
205376_at	INPP4B	8821	inositol polyphosphate-4-phosphatase, type II, 105kDa	38	45	48	43.1	46	33	50	42.2	44	45	41	43.3	60	72	71	67.6		-1.02	1	1	0.996	0	0	0		1.6	0.1172	1	1	0
230021_at	MGC45866	90381	leucine-rich repeat kinase 1	77	100	109	94.1	90	89	94	91	108	108	108	108.1	128	145	173	147.8		-1.03	1	1.1	0.9138	0	0	0		1.6	0.2356	0	0	0
201375_s_at	PPP2CB	5516	protein phosphatase 2 (formerly 2A), catalytic subunit, beta isoform	829	954	911	896.8	845	850	894	862.5	937	969	998	967.5	1361	1486	1379	1407.5		-1.04	1	1.1	0.8888	0	0	0		1.6	0.0392	1	1	0
242300_at			Ubiquitin B (UBB) mRNA, 3' UTR and genetic suppressor element	53	64	57	58	60	42	58	52.4	82	80	82	81.2	68	108	102	91.1		-1.11	1	1.4	0.4872	0	0	0		1.6	0.2811	0	0	0
224933_s_at	JMJD1C	221037	jumonji domain containing 1C	165	154	168	162.1	157	134	189	158.5	171	153	152	158.3	277	244	244	254.3		-1.02	1	-1	0.97	0	0	0		1.6	0.0398	1	1	0
1554015_a_at	CHD2	1106	chromodomain helicase DNA binding protein 2	64	64	71	66	66	64	69	66.4	65	71	70	68.6	85	108	121	103.6		1.01	1	1	0.9504	0	0	0		1.6	0.1671	0	0	0
228571_at		441191	Similar to hypothetical protein FLJ10307	207	210	229	215	203	172	236	201.9	257	293	257	268.5	316	351	346	337.1		-1.06	1	1.2	0.634	0	0	0		1.6	0.0335	1	1	0
220088_at	C5R1	728	complement component 5 receptor 1 (C5a ligand)	21	24	24	22.7	21	18	24	20.7	19	21	22	20.9	32	34	41	35.5		-1.09	1	-1.1	0.9043	0	0	0		1.6	0.1073	1	1	0
221673_s_at	CSNK1G1	53944	casein kinase 1, gamma 1	35	37	34	35.2	35	34	33	33.9	38	37	32	35.7	55	57	53	55.2		-1.04	1	1	0.9869	0	0	0		1.6	0.0167	1	1	0
219600_s_at	TMEM50B	757	transmembrane protein 50B	151	164	147	153.9	142	126	166	143.5	185	188	191	188.2	225	247	252	241.2		-1.07	1	1.2	0.5085	0	0	0		1.6	0.0373	1	1	0
38269_at	PRKD2	25865	protein kinase D2	193	219	216	208.9	196	184	207	195.6	213	218	214	215	311	312	362	327.5		-1.07	1	1	0.9614	0	0	0		1.6	0.0661	1	1	0
225705_at	LOC90799	90799	hypothetical protein BC009518	69	70	71	69.9	77	71	82	76.4	66	77	80	74	92	121	118	109.6		1.09	1	1.1	0.942	0	0	0		1.6	0.1091	1	1	0
221501_x_at	LOC339047	339047	hypothetical protein LOC339047	359	335	346	346.3	380	341	364	361.4	444	384	399	408.2	614	518	503	542.8		1.04	1	1.2	0.7188	0	0	0		1.6	0.0672	1	1	0
217223_s_at	BCR	613	breakpoint cluster region	38	32	43	37.4	41	44	41	42	39	41	43	40.7	55	55	66	58.5		1.12	1	1.1	0.9356	0	0	0		1.6	0.1391	1	1	0
201328_at	ETS2	2114	v-ets erythroblastosis virus E26 oncogene homolog 2 (avian)	119	137	129	127.9	117	112	134	120.5	104	106	103	104	198	209	194	200.4		-1.06	1	-1.2	0.5673	0	0	0		1.6	0.0355	1	1	0
209430_at	BTAF1	9044	BTAF1 RNA polymerase II, B-TFIID transcription factor-associated, 170kDa (Mot1 homolog, S. cerevisiae)	139	138	160	145.5	146	106	155	133.8	152	162	149	154	202	245	239	227.7		-1.09	1	1.1	0.9322	0	0	0		1.6	0.0869	1	1	0
225636_at	STAT2	6773	signal transducer and activator of transcription 2, 113kDa	137	141	137	138.4	146	126	149	139.7	132	142	137	136.9	232	205	214	216.6		1.01	1	-1	0.9729	0	0	0		1.6	0.0243	1	1	0
235331_x_at	PCGF5	84333	polycomb group ring finger 5	30	28	27	28.4	31	19	32	26.7	32	39	32	33.9	30	57	52	44.5		-1.06	1	1.2	0.8224	0	0	0		1.6	0.4065	0	0	0
230052_s_at	TA-NFKBH	84807	T-cell activation NFKB-like protein	40	36	39	38.5	40	34	31	34.9	41	38	36	38.1	57	70	55	60.3		-1.11	1	-1	0.9855	0	0	0		1.6	0.0946	1	1	0
202696_at	OXSR1	9943	oxidative-stress responsive 1	192	211	212	204.8	207	194	228	209.4	197	202	207	202.1	304	317	341	320.2		1.02	1	-1	0.978	0	0	0		1.6	0.0362	1	1	0
225828_at	LOC221955	221955	KCCR13L	26	31	30	29	32	29	36	32	28	34	30	30.9	44	48	44	45.4		1.1	1	1.1	0.9572	0	0	0		1.6	0.0761	1	1	0
226046_at	MAPK8	5599	mitogen-activated protein kinase 8	36	43	42	40.2	39	27	38	34.2	47	48	42	45.7	49	68	74	62.8		-1.18	1	1.1	0.8636	0	0	0		1.6	0.2366	0	0	0
200924_s_at	SLC3A2	6520	solute carrier family 3 (activators of dibasic and neutral amino acid transport), member 2	758	820	759	778.1	711	737	781	742.7	828	813	821	820.7	1217	1207	1225	1216.3		-1.05	1	1.1	0.862	0	0	0		1.6	0.0125	1	1	0
1555760_a_at	RBM15	64783	RNA binding motif protein 15	131	135	121	128.7	130	123	132	128.6	146	153	138	145.6	194	201	208	201.1		-1	1	1.1	0.7863	0	0	0		1.6	0.0224	1	1	0
212171_x_at	VEGF	7422	vascular endothelial growth factor	82	80	76	79.3	83	83	72	79	79	83	88	83.3	131	116	124	123.9		-1	1	1.1	0.9102	0	0	0		1.6	0.0281	1	1	0
230051_at	C10orf47	254427	chromosome 10 open reading frame 47	53	67	59	59.4	58	42	52	50.2	72	83	68	74.1	75	97	110	92.8		-1.19	1	1.2	0.827	0	0	0		1.6	0.2256	0	0	0
1558511_s_at	FAM62B	57488	family with sequence similarity 62 (C2 domain containing) member B	228	222	217	222.2	240	173	243	216.3	216	235	228	226.1	287	378	385	347		-1.03	1	1	0.9642	0	0	0		1.6	0.1325	1	1	0
209502_s_at	BAIAP2	10458	BAI1-associated protein 2	37	45	34	38.6	35	56	42	43.3	41	42	41	41.1	61	57	62	60.2		1.12	1	1.1	0.9593	0	0	0		1.6	0.1196	1	1	0
203117_s_at	USP52	9924	ubiquitin specific peptidase 52	74	78	76	75.7	76	61	80	71.8	76	79	82	79	106	121	129	118.2		-1.05	1	1	0.8926	0	0	0		1.6	0.0558	1	1	0
224927_at	KIAA1949	170954	KIAA1949	97	103	119	105.8	104	88	121	103.5	90	97	106	97.6	152	169	176	165.2		-1.02	1	-1.1	0.9361	0	0	0		1.6	0.0868	1	1	0
215711_s_at	WEE1	7465	WEE1 homolog (S. pombe)	83	86	84	84.2	75	66	81	73.8	79	77	82	79.4	123	125	147	131.5		-1.14	1	-1.1	0.791	0	0	0		1.6	0.0506	1	1	0
241994_at	XDH	7498	Xanthine dehydrogenase	21	21	22	21.5	22	22	22	22	19	21	21	20.2	28	35	39	33.6		1.02	1	-1.1	0.9017	0	0	0		1.6	0.1396	1	1	0
209274_s_at	HBLD2	81689	HESB like domain containing 2	487	501	527	504.5	523	460	510	497.1	678	716	653	681.6	798	818	748	787.7		-1.01	1	1.4	0.3884	0	0	0		1.6	0.0214	1	1	0
205438_at	PTPN21	11099	protein tyrosine phosphatase, non-receptor type 21	26	40	34	32.9	31	37	35	34.6	36	35	32	34.4	58	51	45	51.3		1.05	1	1	0.9799	0	0	0		1.6	0.2655	0	0	0
243918_at	DRE1	54800	Kelch-like 24 (Drosophila)	17	17	18	17.2	17	16	22	18.2	20	22	14	18.3	23	31	27	26.8		1.06	1	1.1	0.9754	0	0	0		1.6	0.1079	1	1	0
220172_at	FLJ13096	80067	hypothetical protein FLJ13096	18	15	23	18.4	20	13	17	16.4	20	18	18	18.7	21	32	35	28.6		-1.12	1	1	0.9916	0	0	0		1.6	0.3818	0	0	0
221999_at	VRK3	51231	vaccinia related kinase 3	81	101	100	93.6	99	87	95	93.3	105	99	104	102.6	174	136	131	146		-1	1	1.1	0.9185	0	0	0		1.6	0.1777	0	0	0
37152_at	PPARD	5467	peroxisome proliferative activated receptor, delta	100	91	99	96.5	101	85	94	92.9	88	98	100	95.1	127	160	169	150.4		-1.04	1	-1	0.9841	0	0	0		1.6	0.1261	1	1	0
214057_at	MCL1	4170	Myeloid cell leukemia sequence 1 (BCL2-related)	38	39	38	38.1	39	38	40	39.1	44	47	36	41.9	62	63	54	59.5		1.02	1	1.1	0.9247	0	0	0		1.6	0.0422	1	1	0
229419_at	FBXW7	55294	F-box and WD-40 domain protein 7 (archipelago homolog, Drosophila)	28	34	28	30	30	26	30	28.2	29	32	34	31.4	34	45	66	46.7		-1.06	1	1	0.9676	0	0	0		1.6	0.4109	0	0	0
212859_x_at	MT1E	4493	metallothionein 1E (functional)	65	94	75	76.9	85	88	74	82.1	135	110	116	120.1	147	109	107	119.9		1.07	1	1.6	0.6901	0	0	0		1.6	0.2662	0	0	0
200768_s_at	MAT2A	4144	methionine adenosyltransferase II, alpha	673	666	661	666.5	679	682	731	697.3	715	714	750	725.8	1065	1058	993	1038.3		1.05	1	1.1	0.5575	0	0	0		1.6	0.01	1	1	0
1558305_at	TNRC15	26058	Trinucleotide repeat containing 15	17	16	18	17.2	16	18	19	17.8	16	18	16	16.7	22	34	26	26.8		1.03	1	-1	0.9619	0	0	0		1.6	0.2316	0	0	0
222508_s_at	FLJ10154	55082	hypothetical protein FLJ10154	33	45	37	38	42	44	46	44.1	35	42	45	40.5	50	60	69	59.2		1.16	1	1.1	0.97	0	0	0		1.6	0.2323	0	0	0
221732_at	CANT1	124583	calcium activated nucleotidase 1	310	352	335	331.7	311	331	348	329.5	312	311	321	314.4	509	526	514	516.1		-1.01	1	-1.1	0.904	0	0	0		1.6	0.0245	1	1	0
212009_s_at	STIP1	10963	stress-induced-phosphoprotein 1 (Hsp70/Hsp90-organizing protein)	470	504	457	476.5	439	461	457	452.2	485	483	559	508.1	738	718	769	741.2		-1.05	1	1.1	0.9261	0	0	0		1.6	0.0217	1	1	0
219921_s_at	DOCK5	80005	dedicator of cytokinesis 5	48	54	45	48.9	56	42	50	48.9	54	48	46	49.1	83	61	87	76.1		-1	1	1	0.9979	0	0	0		1.6	0.2145	0	0	0
216202_s_at	SPTLC2	9517	serine palmitoyltransferase, long chain base subunit 2	69	75	79	74	78	64	81	74.1	70	68	84	73.6	99	124	125	115		1	1	-1	0.9953	0	0	0		1.6	0.1128	1	1	0
208814_at	HSPA4	3308	Heat shock 70kDa protein 4	81	78	92	83.6	90	72	96	85.3	112	110	106	109.4	94	139	168	130		1.02	1	1.3	0.5521	0	0	0		1.6	0.3535	0	0	0
219026_s_at	RASAL2	9462	RAS protein activator like 2	21	37	37	30.8	28	26	34	29.2	30	30	25	28.1	37	51	58	47.8		-1.05	1	-1.1	0.9721	0	0	0		1.6	0.4552	0	0	0
205001_s_at	DDX3Y	8653	DEAD (Asp-Glu-Ala-Asp) box polypeptide 3, Y-linked	147	149	147	147.7	135	103	181	136	153	156	150	152.8	194	229	271	229.4		-1.09	1	1	0.8047	0	0	0		1.6	0.1355	1	1	0
219257_s_at	SPHK1	8877	sphingosine kinase 1	48	54	46	49	51	52	44	48.9	45	47	46	46	60	87	84	76.1		-1	1	-1.1	0.9241	0	0	0		1.6	0.2237	0	0	0
233691_at	ABTB2	25841	Ankyrin repeat and BTB (POZ) domain containing 2	30	27	29	28.5	28	37	32	32	31	34	40	34.5	45	37	52	44.3		1.12	1	1.2	0.8396	0	0	0		1.6	0.1552	0	0	0
211840_s_at	PDE4D	5144	phosphodiesterase 4D, cAMP-specific (phosphodiesterase E3 dunce homolog, Drosophila)	32	23	26	26.6	32	23	26	26.7	34	29	29	30.6	37	42	45	41.3		1.01	1	1.2	0.9138	0	0	0		1.6	0.1697	0	0	0
202010_s_at	ZNF410	57862	zinc finger protein 410	236	213	239	228.9	209	185	213	201.7	236	214	219	223	318	375	376	355.3		-1.13	1	-1	0.9683	0	0	0		1.6	0.0726	1	1	0
233936_s_at	ZNF403	79893	zinc finger protein 403	168	162	176	168.7	190	148	211	181	196	214	227	212.1	211	273	311	261.9		1.07	1	1.3	0.5898	0	0	0		1.6	0.1871	0	0	0
209984_at	JMJD2C	23081	jumonji domain containing 2C	47	50	47	48.1	51	38	54	47	59	64	57	60.1	66	76	82	74.7		-1.02	1	1.3	0.5352	0	0	0		1.6	0.0767	1	1	0
1557765_at	LOC340109	340109	hypothetical protein LOC340109	17	16	17	16.7	20	15	21	18.2	15	18	17	16.5	18	31	31	25.9		1.09	1	-1	0.9891	0	0	0		1.6	0.3698	0	0	0
206108_s_at	SFRS6	6431	splicing factor, arginine/serine-rich 6	86	111	90	95.1	79	66	98	80.1	97	106	99	100.6	124	154	168	147.5		-1.19	1	1.1	0.9607	0	0	0		1.6	0.1878	0	0	0
237870_at	LOC285771	285771	hypothetical protein LOC285771	34	31	32	32.2	35	31	35	33.6	36	33	32	33.6	53	45	52	49.9		1.04	1	1	0.9502	0	0	0		1.6	0.0635	1	1	0
223165_s_at	IHPK2	51447	inositol hexaphosphate kinase 2	169	182	182	177.4	197	173	189	186.1	184	187	196	188.9	262	288	276	275.3		1.05	1	1.1	0.8649	0	0	0		1.6	0.024	1	1	0
218131_s_at	GATAD2A	54815	GATA zinc finger domain containing 2A	153	170	180	167.2	146	141	154	146.8	164	153	167	161.2	225	263	295	259.3		-1.14	1	-1	0.9614	0	0	0		1.6	0.1225	1	1	0
222991_s_at	UBQLN1	29979	ubiquilin 1	207	197	194	199.3	187	166	212	187.1	205	209	215	209.7	293	328	307	309		-1.07	1	1.1	0.8509	0	0	0		1.6	0.0255	1	1	0
212971_at	CARS	833	cysteinyl-tRNA synthetase	572	665	665	632.3	554	601	673	607.6	621	599	607	608.7	976	986	978	980.1		-1.04	1	-1	0.9576	0	0	0		1.6	0.0426	1	1	0
217094_s_at	ITCH	83737	itchy homolog E3 ubiquitin protein ligase (mouse)	62	68	66	65.3	67	66	70	67.6	64	64	64	63.8	102	103	98	101.2		1.04	1	-1	0.9534	0	0	0		1.6	0.0175	1	1	0
1552362_a_at	LEAP-2	116842	liver-expressed antimicrobial peptide 2	50	52	50	50.6	54	61	54	56.1	49	53	63	54.6	59	89	92	78.4		1.11	1	1.1	0.936	0	0	0		1.5	0.2592	0	0	0
209260_at	SFN	2810	stratifin	120	131	123	124.6	113	137	127	125.4	106	111	114	110.4	222	173	188	193		1.01	1	-1.1	0.7181	0	0	0		1.5	0.0972	1	1	0
230788_at	GCNT2	2651	glucosaminyl (N-acetyl) transferase 2, I-branching enzyme	182	184	203	189.4	177	165	212	183.7	140	172	159	156.6	278	304	299	293.2		-1.03	1	-1.2	0.791	0	0	0		1.5	0.0338	1	1	0
231261_at	C19orf15	57828	chromosome 19 open reading frame 15	18	17	20	18.4	18	27	21	21.5	28	21	19	22.5	34	25	26	28.4		1.17	1	1.2	0.8951	0	0	0		1.5	0.1656	0	0	0
204194_at	BACH1	571	BTB and CNC homology 1, basic leucine zipper transcription factor 1	87	88	90	88.2	95	60	96	81.6	99	115	112	108.5	108	158	150	136.6		-1.08	1	1.2	0.6151	0	0	0		1.5	0.1988	0	0	0
223217_s_at	NFKBIZ	64332	nuclear factor of kappa light polypeptide gene enhancer in B-cells inhibitor, zeta	90	94	110	97.8	104	102	123	109.2	133	135	122	129.8	137	153	166	151.5		1.12	1	1.3	0.6401	0	0	0		1.5	0.1086	1	1	0
208328_s_at	MEF2A	4205	MADS box transcription enhancer factor 2, polypeptide A (myocyte enhancer factor 2A)	23	25	29	25.8	26	18	23	22.1	23	24	23	23.3	25	54	48	39.9		-1.16	1	-1.1	0.904	0	0	0		1.5	0.5193	0	0	0
1555762_s_at	RBM15	64783	RNA binding motif protein 15	168	154	158	159.7	143	123	166	143.2	158	162	165	161.8	230	261	251	247.1		-1.11	1	1	0.9744	0	0	0		1.5	0.0358	1	1	0
212125_at	RANGAP1	5905	Ran GTPase activating protein 1	94	90	97	93.5	88	84	98	89.7	96	108	121	107.7	139	143	152	144.7		-1.04	1	1.2	0.863	0	0	0		1.5	0.0204	1	1	0
46323_at	CANT1	124583	calcium activated nucleotidase 1	273	304	291	288.8	292	257	285	277.6	247	257	282	261.4	424	438	480	446.8		-1.04	1	-1.1	0.8662	0	0	0		1.5	0.0404	1	1	0
37860_at	ZNF337	26152	zinc finger protein 337	84	97	93	91.2	108	80	95	93.6	102	113	112	109.1	119	149	158	141		1.03	1	1.2	0.7181	0	0	0		1.5	0.133	1	1	0
1555971_s_at	FBXO28	23219	F-box protein 28	148	161	156	155.2	146	118	154	138.7	138	161	140	145.9	178	264	295	239.9		-1.12	1	-1.1	0.928	0	0	0		1.5	0.2981	0	0	0
1552928_s_at	TAB3	257397	TAK1-binding protein 3	12	12	12	12.2	11	12	15	12.7	12	13	14	13.2	17	22	18	18.8		1.04	1	1.1	0.8912	0	0	0		1.5	0.1075	1	1	0
203044_at	CHSY1	22856	carbohydrate (chondroitin) synthase 1	252	266	272	263.4	276	257	293	274.7	554	527	490	523.2	341	436	453	407.1		1.04	1	2	0.1506	0	0	0		1.5	0.1261	1	1	0
224967_at	UGCG	7357	UDP-glucose ceramide glucosyltransferase	204	191	195	196.6	190	165	201	184.9	226	234	218	225.8	279	311	323	303.9		-1.06	1	1.1	0.5765	0	0	0		1.5	0.0387	1	1	0
202130_at	RIOK3	8780	RIO kinase 3 (yeast) /// RIO kinase 3 (yeast)	187	209	215	203.1	191	185	210	194.9	220	217	199	212	301	316	325	314		-1.04	1	1	0.9536	0	0	0		1.5	0.0404	1	1	0
218273_s_at	PPM2C	54704	protein phosphatase 2C, magnesium-dependent, catalytic subunit	32	44	41	38.6	36	24	38	32.2	31	34	38	34.3	49	64	67	59.6		-1.2	1	-1.1	0.9299	0	0	0		1.5	0.242	0	0	0
227731_at	ZNF9	7555	Zinc finger protein 9 (a cellular retroviral nucleic acid binding protein)	52	46	44	47.3	56	29	56	45.1	74	64	60	65.5	67	73	80	73.1		-1.05	1	1.4	0.6418	0	0	0		1.5	0.0853	1	1	0
225644_at	FLJ33814	150275	hypothetical protein FLJ33814	116	104	117	112.3	107	76	113	97.3	118	134	116	122.3	126	207	199	173.3		-1.15	1	1.1	0.9033	0	0	0		1.5	0.3241	0	0	0
213038_at	IBRDC3	127544	IBR domain containing 3	39	49	41	42.8	45	28	47	39.1	38	44	41	40.6	57	72	71	66.1		-1.09	1	-1.1	0.9648	0	0	0		1.5	0.1545	0	0	0
211702_s_at	USP32	84669	ubiquitin specific peptidase 32 /// ubiquitin specific peptidase 32	146	126	144	138.4	149	129	140	139.3	127	128	134	129.8	182	214	249	213.5		1.01	1	-1.1	0.9138	0	0	0		1.5	0.1506	0	0	0
220127_s_at	FBXL12	54850	F-box and leucine-rich repeat protein 12	96	109	113	105.9	113	89	106	102.1	102	95	98	98.3	153	168	169	163.3		-1.04	1	-1.1	0.9073	0	0	0		1.5	0.0617	1	1	0
230634_x_at	LOC113179	113179	hypothetical protein BC011824	40	50	44	44.4	43	54	44	46.5	41	49	50	46.5	89	57	64	68.5		1.05	1	1	0.9708	0	0	0		1.5	0.2822	0	0	0
205773_at	CPEB3	22849	cytoplasmic polyadenylation element binding protein 3	11	11	13	11.8	12	11	12	11.9	11	14	13	12.5	13	19	25	18.3		1	1	1.1	0.9542	0	0	0		1.5	0.3901	0	0	0
218738_s_at	RNF138	51444	ring finger protein 138	158	181	181	173	158	136	188	159.2	189	217	216	206.9	224	281	301	266.5		-1.09	1	1.2	0.791	0	0	0		1.5	0.1495	1	1	0
232078_at	PVRL2	5819	poliovirus receptor-related 2 (herpesvirus entry mediator B)	66	85	77	75.5	80	72	86	79.2	73	81	85	79.2	108	119	123	116.3		1.05	1	1	0.9676	0	0	0		1.5	0.1046	1	1	0
203749_s_at	RARA	5914	retinoic acid receptor, alpha	38	38	37	37.6	38	41	36	38.2	37	34	33	34.6	57	56	61	57.9		1.02	1	-1.1	0.8404	0	0	0		1.5	0.0143	1	1	0
208078_s_at	SNF1LK	150094	SNF1-like kinase /// SNF1-like kinase	712	742	760	737.8	759	716	737	737	819	810	808	812.5	1082	1139	1187	1135.3		-1	1	1.1	0.5673	0	0	0		1.5	0.0198	1	1	0
202499_s_at	SLC2A3	6515	solute carrier family 2 (facilitated glucose transporter), member 3	91	100	90	93.2	101	84	109	97.5	122	141	133	131.9	124	145	165	143.4		1.05	1	1.4	0.4746	0	0	0		1.5	0.1223	1	1	0
225544_at	TBX3	6926	T-box 3 (ulnar mammary syndrome)	109	109	109	108.9	120	105	105	109.8	103	101	107	103.6	159	172	171	167.4		1.01	1	-1.1	0.7913	0	0	0		1.5	0.0128	1	1	0
218809_at	PANK2	80025	pantothenate kinase 2 (Hallervorden-Spatz syndrome)	267	293	285	281.5	287	247	306	279	292	281	276	282.9	444	431	425	433		-1.01	1	1	0.9914	0	0	0		1.5	0.0174	1	1	0
227082_at			MRNA; cDNA DKFZp586K1922 (from clone DKFZp586K1922)	123	105	109	111.8	113	76	127	102.7	134	136	128	132.5	142	179	200	171.9		-1.09	1	1.2	0.7464	0	0	0		1.5	0.1806	0	0	0
230766_at			Transcribed locus, weakly similar to NP_062553.1 hypothetical protein FLJ11267 [Homo sapiens]	37	34	37	36.2	40	23	33	31.1	30	31	35	31.9	44	56	69	55.6		-1.16	1	-1.1	0.8473	0	0	0		1.5	0.2428	0	0	0
217503_at				16	19	17	17.4	20	17	18	18.3	19	19	16	18.1	22	25	36	26.8		1.05	1	1	0.966	0	0	0		1.5	0.2893	0	0	0
215087_at	DKFZP434H132	56905	DKFZP434H132 protein	22	26	25	24.2	24	25	24	24.6	27	25	29	26.9	33	43	36	37.2		1.02	1	1.1	0.8926	0	0	0		1.5	0.1421	1	1	0
229318_at			Full-length cDNA clone CS0DC003YI17 of Neuroblastoma Cot 25-normalized of Homo sapiens (human)	65	74	72	70.3	67	66	68	67	63	63	70	65.4	90	118	119	108		-1.05	1	-1.1	0.9102	0	0	0		1.5	0.1472	1	1	0
201761_at	MTHFD2	10797	methylenetetrahydrofolate dehydrogenase (NADP+ dependent) 2, methenyltetrahydrofolate cyclohydrolase	937	890	940	921.9	935	867	972	923.6	940	981	977	965.8	1172	1556	1558	1416.3		1	1	1	0.8554	0	0	0		1.5	0.1408	1	1	0
209318_x_at	PLAGL1	5325	pleiomorphic adenoma gene-like 1	102	105	105	104	117	63	110	93.1	115	134	140	129.3	126	167	194	159.7		-1.12	1	1.2	0.6901	0	0	0		1.5	0.2262	0	0	0
223471_at	RAB3IP	117177	RAB3A interacting protein (rabin3)	49	49	54	50.5	46	38	58	46.9	44	59	51	50.9	65	81	88	77.6		-1.08	1	1	0.9953	0	0	0		1.5	0.1363	1	1	0
203519_s_at	UPF2	26019	UPF2 regulator of nonsense transcripts homolog (yeast)	155	149	154	152.8	161	136	152	149	149	162	162	157.5	213	248	246	234.7		-1.03	1	1	0.9361	0	0	0		1.5	0.0458	1	1	0
227638_at	KIAA1632	57724	KIAA1632	48	43	48	46.6	50	39	53	46.7	51	54	48	51.3	63	76	77	71.5		1	1	1.1	0.8694	0	0	0		1.5	0.0922	1	1	0
1552696_at	NIPA1	123606	non imprinted in Prader-Willi/Angelman syndrome 1	44	46	46	45.4	45	36	55	44.9	53	47	53	50.9	58	74	79	69.7		-1.01	1	1.1	0.7969	0	0	0		1.5	0.1429	1	1	0
211168_s_at	RENT1	5976	regulator of nonsense transcripts 1	87	100	95	93.8	86	95	100	93.5	93	94	103	96.5	158	144	131	144		-1	1	1	0.9698	0	0	0		1.5	0.0798	1	1	0
213424_at	KIAA0895	23366	KIAA0895 protein	53	45	58	51.7	56	34	53	47	51	58	49	52.6	50	97	103	79.4		-1.1	1	1	0.9891	0	0	0		1.5	0.5054	0	0	0
203099_s_at	CDYL	9425	chromodomain protein, Y-like	65	67	64	65.3	71	70	70	70.4	67	65	61	64.2	105	103	93	100.2		1.08	1	-1	0.9703	0	0	0		1.5	0.0281	1	1	0
225133_at	KLF3	51274	Kruppel-like factor 3 (basic)	201	223	240	220.8	203	164	228	196.6	163	199	203	187.4	298	360	363	338.7		-1.12	1	-1.2	0.8702	0	0	0		1.5	0.1098	1	1	0
218107_at	WDR26	80232	WD repeat domain 26	390	403	413	401.8	394	372	451	404.3	384	404	409	398.7	590	627	632	616.2		1.01	1	-1	0.9825	0	0	0		1.5	0.0138	1	1	0
211382_s_at	TACC2	10579	transforming, acidic coiled-coil containing protein 2	214	259	247	239.5	248	238	245	243.4	238	245	254	246	355	362	386	367.2		1.02	1	1	0.9749	0	0	0		1.5	0.0689	1	1	0
224477_s_at	NUDT16L1	84309	nudix (nucleoside diphosphate linked moiety X)-type motif 16-like 1 /// nudix (nucleoside diphosphate linked moiety X)-type motif 16-like 1	79	88	87	84.3	82	84	96	86.9	96	100	92	95.7	126	131	132	129.3		1.03	1	1.1	0.7666	0	0	0		1.5	0.0245	1	1	0
1563315_s_at	ERICH1	157697	glutamate-rich 1	71	74	78	74.3	70	66	74	70.2	73	91	75	79.4	108	120	114	113.9		-1.06	1	1.1	0.9481	0	0	0		1.5	0.0277	1	1	0
202679_at	NPC1	4864	Niemann-Pick disease, type C1	138	170	187	164.1	162	156	176	164.6	174	190	186	183	232	258	266	251.3		1	1	1.1	0.9239	0	0	0		1.5	0.1483	1	1	0
236599_at	SERPINE2	5270	Serpin peptidase inhibitor, clade E (nexin, plasminogen activator inhibitor type 1), member 2	42	37	43	40.5	44	38	37	39.6	36	43	39	39.3	50	69	70	62.1		-1.02	1	-1	0.9758	0	0	0		1.5	0.2122	0	0	0
204970_s_at	MAFG	4097	v-maf musculoaponeurotic fibrosarcoma oncogene homolog G (avian)	142	161	167	156.3	159	155	157	157.3	182	164	169	171.6	229	245	244	239.4		1.01	1	1.1	0.8926	0	0	0		1.5	0.0491	1	1	0
204566_at	PPM1D	8493	protein phosphatase 1D magnesium-dependent, delta isoform	140	175	173	161.5	157	117	160	143.5	146	150	148	148.3	229	251	263	247.2		-1.13	1	-1.1	0.9241	0	0	0		1.5	0.1105	1	1	0
202722_s_at	GFPT1	2673	glutamine-fructose-6-phosphate transaminase 1	278	282	276	278.7	265	253	289	268.7	242	289	266	265.2	369	447	471	426.6		-1.04	1	-1.1	0.9404	0	0	0		1.5	0.0929	1	1	0
211997_x_at	H3F3B	3021	H3 histone, family 3B (H3.3B)	3313	3398	3454	3387.7	3357	3452	3526	3444.5	3623	3483	3467	3523.8	5225	5083	5246	5184.3		1.02	1	1	0.8532	0	0	0		1.5	0.0048	1	1	0
202577_s_at	DDX19A	55308	DEAD (Asp-Glu-Ala-As) box polypeptide 19A	97	90	97	94.4	105	79	106	95.9	88	102	100	96.4	110	160	171	144.4		1.02	1	1	0.9771	0	0	0		1.5	0.2599	0	0	0
202453_s_at	GTF2H1	2965	general transcription factor IIH, polypeptide 1, 62kDa	100	108	111	106.3	87	84	107	92.2	99	100	98	98.8	163	160	165	162.6		-1.15	1	-1.1	0.8466	0	0	0		1.5	0.0221	1	1	0
210511_s_at	INHBA	3624	inhibin, beta A (activin A, activin AB alpha polypeptide)	23	24	21	22.6	24	27	17	22.3	21	23	24	22.6	36	31	38	34.6		-1.01	1	-1	0.9982	0	0	0		1.5	0.0901	1	1	0
212715_s_at	MICAL3	57553	microtubule associated monoxygenase, calponin and LIM domain containing 3	34	41	39	37.7	34	35	41	36.3	37	40	41	39.2	46	60	70	57.7		-1.04	1	1	0.9678	0	0	0		1.5	0.2557	0	0	0
229194_at	PCGF5	84333	polycomb group ring finger 5	132	136	137	135	136	87	144	119.4	159	173	151	160.8	165	229	233	206.3		-1.13	1	1.2	0.6374	0	0	0		1.5	0.186	0	0	0
202531_at	IRF1	3659	interferon regulatory factor 1	51	57	59	55.7	60	53	57	56.6	62	60	62	61.2	72	91	94	85.1		1.02	1	1.1	0.8613	0	0	0		1.5	0.1439	1	1	0
209750_at	NR1D2	9975	nuclear receptor subfamily 1, group D, member 2	218	186	203	202.1	205	170	235	201.6	176	183	183	180.5	251	339	345	308.6		-1	1	-1.1	0.8372	0	0	0		1.5	0.1886	0	0	0
225186_at	RAPH1	65059	Ras association (RalGDS/AF-6) and pleckstrin homology domains 1	55	53	55	54.3	57	38	52	48.1	48	49	53	49.9	66	92	94	82.9		-1.13	1	-1.1	0.8427	0	0	0		1.5	0.2073	0	0	0
212479_s_at	FLJ13910	64795	hypothetical protein FLJ13910	58	67	66	63.4	63	43	62	55.2	58	62	54	57.8	89	102	100	96.8		-1.15	1	-1.1	0.9033	0	0	0		1.5	0.0672	1	1	0
235170_at	ZNF92	168374	zinc finger protein 92 (HTF12)	142	128	125	131.5	145	74	127	111.1	152	170	143	154.8	143	245	231	200.7		-1.18	1	1.2	0.8178	0	0	0		1.5	0.3609	0	0	0
226628_at	THOC2	57187	THO complex 2	62	64	60	61.9	60	32	65	50	50	62	65	58.7	75	105	107	94.4		-1.24	1	-1.1	0.9631	0	0	0		1.5	0.2056	0	0	0
1557458_s_at	SHB	6461	Src homology 2 domain containing adaptor protein B	126	122	126	124.7	109	110	116	111.6	143	140	153	145.1	190	188	193	190.1		-1.12	1	1.2	0.5488	0	0	0		1.5	0.0037	1	1	0
209102_s_at	HBP1	26959	HMG-box transcription factor 1	267	258	271	265	266	223	272	252.6	226	250	245	240.3	389	416	408	404.1		-1.05	1	-1.1	0.7837	0	0	0		1.5	0.012	1	1	0
214766_s_at	AHCTF1	25909	AT hook containing transcription factor 1	141	121	137	132.6	132	105	137	123.5	123	141	131	131.6	162	234	217	202.1		-1.07	1	-1	0.9923	0	0	0		1.5	0.2181	0	0	0
235652_at	SCML1	6322	Sex comb on midleg-like 1 (Drosophila)	61	56	55	57.5	58	47	66	56.4	65	66	65	65.2	82	91	90	87.5		-1.02	1	1.1	0.7024	0	0	0		1.5	0.0392	1	1	0
219634_at	CHST11	50515	carbohydrate (chondroitin 4) sulfotransferase 11	40	44	53	45.3	50	42	47	46.2	47	46	50	48	65	67	76	69		1.02	1	1.1	0.9631	0	0	0		1.5	0.1529	0	0	0
211016_x_at	HSPA4	3308	heat shock 70kDa protein 4	154	169	133	151.4	152	144	167	153.9	171	175	166	170.6	223	219	251	230.6		1.02	1	1.1	0.8902	0	0	0		1.5	0.1098	1	1	0
217028_at	CXCR4	7852	chemokine (C-X-C motif) receptor 4	12	14	12	12.8	12	14	12	12.6	14	12	12	12.5	18	20	21	19.5		-1.01	1	-1	0.9803	0	0	0		1.5	0.071	1	1	0
209824_s_at	ARNTL	406	aryl hydrocarbon receptor nuclear translocator-like	107	117	112	111.9	110	107	121	112.7	103	114	123	113.4	165	181	165	170.2		1.01	1	1	0.9859	0	0	0		1.5	0.0308	1	1	0
203194_s_at	NUP98	4928	nucleoporin 98kDa	131	141	139	136.9	131	133	138	133.8	121	133	135	129.6	183	229	215	208.3		-1.02	1	-1.1	0.9102	0	0	0		1.5	0.0852	1	1	0
212975_at	DENND3	22898	DENN/MADD domain containing 3	38	42	42	40.8	42	47	37	41.9	40	44	43	42.5	62	60	64	62		1.03	1	1	0.942	0	0	0		1.5	0.0258	1	1	0
201471_s_at	SQSTM1	8878	sequestosome 1	1181	1153	1190	1175	1141	1150	1240	1176.3	1163	1260	1249	1223.1	1741	1781	1842	1787.6		1	1	1	0.9028	0	0	0		1.5	0.0076	1	1	0
202569_s_at	MARK3	4140	MAP/microtubule affinity-regulating kinase 3	112	107	109	109.4	103	95	109	102.2	97	122	120	112.4	142	176	183	166.3		-1.07	1	1	0.9779	0	0	0		1.5	0.1067	1	1	0
212853_at	DCUN1D4	23142	DCN1, defective in cullin neddylation 1, domain containing 4 (S. cerevisiae)	40	42	41	40.8	43	33	44	39.7	38	42	41	40.6	53	72	63	62.1		-1.03	1	-1	0.9898	0	0	0		1.5	0.137	1	1	0
221496_s_at	TOB2	10766	transducer of ERBB2, 2	91	94	93	92.8	95	84	103	93.5	89	90	92	90	129	143	152	141		1.01	1	-1	0.8613	0	0	0		1.5	0.045	1	1	0
222872_x_at	FLJ22833	64859	hypothetical protein FLJ22833	83	82	77	80.5	78	57	84	71.7	83	85	82	83.3	105	127	136	122.2		-1.12	1	1	0.9066	0	0	0		1.5	0.1096	1	1	0
209850_s_at	CDC42EP2	10435	CDC42 effector protein (Rho GTPase binding) 2	101	96	91	95.6	106	84	93	93.8	107	79	87	90.3	167	131	140	145.2		-1.02	1	-1.1	0.966	0	0	0		1.5	0.1027	1	1	0
224411_at	PLA2G12B	84647	phospholipase A2, group XIIB /// phospholipase A2, group XIIB	30	31	28	29.8	33	40	31	34.5	30	30	30	30.3	44	43	49	45.3		1.15	1	1	0.9708	0	0	0		1.5	0.0414	1	1	0
213234_at	KIAA1467	57613	KIAA1467 protein	32	37	41	36.5	42	38	40	40	40	34	37	37.2	57	47	63	55.5		1.1	1	1	0.9876	0	0	0		1.5	0.1805	0	0	0
225708_at	IXL	55588	intersex-like (Drosophila)	155	168	171	164.5	166	149	173	162.3	157	177	192	174.5	225	265	260	249.7		-1.01	1	1.1	0.9477	0	0	0		1.5	0.0668	1	1	0
218134_s_at	RBM22	55696	RNA binding motif protein 22	325	292	312	309.7	290	245	321	283.7	328	374	348	349.6	422	518	474	469.9		-1.09	1	1.1	0.8263	0	0	0		1.5	0.0792	1	1	0
210639_s_at	ATG5	9474	ATG5 autophagy related 5 homolog (S. cerevisiae)	76	84	93	83.8	78	59	89	74.6	73	80	86	79.5	117	130	135	127.2		-1.12	1	-1.1	0.9596	0	0	0		1.5	0.0878	1	1	0
219446_at	RIC8B	55188	resistance to inhibitors of cholinesterase 8 homolog B (C. elegans)	94	97	89	93.1	92	76	100	88.8	88	99	85	90.4	132	139	154	141.2		-1.05	1	-1	0.9687	0	0	0		1.5	0.0488	1	1	0
224790_at	DDEF1	50807	development and differentiation enhancing factor 1	234	220	215	223	225	218	228	223.6	228	250	241	239.3	291	351	379	338.3		1	1	1.1	0.8702	0	0	0		1.5	0.1126	1	1	0
214870_x_at	NPIP /// LOC339047 /// LOC440341	339047 /// 440341 /// 9284	nuclear pore complex interacting protein /// hypothetical protein LOC339047 /// similar to hypothetical protein LOC339047	278	317	286	293.1	302	320	303	308.2	363	331	338	343.7	490	417	430	444.4		1.05	1	1.2	0.7532	0	0	0		1.5	0.0733	1	1	0
218093_s_at	ANKRD10	55608	ankyrin repeat domain 10	154	138	150	147.2	175	124	162	151.6	162	166	157	161.7	168	255	259	223.1		1.03	1	1.1	0.8208	0	0	0		1.5	0.2893	0	0	0
221249_s_at	LOC81558	81558	C/EBP-induced protein /// C/EBP-induced protein	43	46	45	44.9	48	33	51	43.5	36	41	42	39.5	63	69	73	68.1		-1.03	1	-1.1	0.7823	0	0	0		1.5	0.0378	1	1	0
1553535_a_at	RANGAP1	5905	Ran GTPase activating protein 1	78	96	91	87.9	94	90	91	91.9	87	102	102	96.8	135	125	141	133.1		1.05	1	1.1	0.9218	0	0	0		1.5	0.0917	1	1	0
227990_at	SLU7	10569	Step II splicing factor SLU7	165	166	187	172.1	166	144	162	156.9	173	197	185	184.4	223	283	281	260.7		-1.1	1	1.1	0.9171	0	0	0		1.5	0.1291	1	1	0
226541_at	FBXO30	84085	F-box protein 30	182	211	203	198.1	193	178	228	198.7	225	234	229	229.2	259	324	322	300		1	1	1.2	0.7576	0	0	0		1.5	0.1225	1	1	0
215495_s_at	SAMD4	23034	sterile alpha motif domain containing 4	18	22	22	20.6	19	37	20	23.9	22	22	21	21.7	38	28	29	31.2		1.16	1	1.1	0.9587	0	0	0		1.5	0.2336	0	0	0
203248_at	ZNF24	7572	zinc finger protein 24 (KOX 17)	47	48	41	45.1	47	46	49	47.3	46	52	48	48.2	63	73	70	68.3		1.05	1	1.1	0.9364	0	0	0		1.5	0.085	1	1	0
212780_at	SOS1	6654	son of sevenless homolog 1 (Drosophila)	141	137	137	138.2	137	100	148	126.2	127	154	142	140.5	178	229	224	209.2		-1.1	1	1	0.9826	0	0	0		1.5	0.1116	1	1	0
225075_at	PDRG1	81572	p53 and DNA damage regulated 1	145	150	158	150.7	147	167	148	153.8	159	157	170	162.1	256	225	206	228		1.02	1	1.1	0.8501	0	0	0		1.5	0.0821	1	1	0
242255_at	IDI1	3422	Isopentenyl-diphosphate delta isomerase 1	15	14	18	15.6	13	11	14	12.8	13	13	13	13.1	16	35	23	23.5		-1.22	1	-1.2	0.8372	0	0	0		1.5	0.5106	0	0	0
204908_s_at	BCL3	602	B-cell CLL/lymphoma 3	278	316	313	301.6	300	294	354	315	232	272	348	279.8	433	444	494	456.2		1.04	1	-1.1	0.966	0	0	0		1.5	0.0621	1	1	0
223533_at	LRRC8C	84230	leucine rich repeat containing 8 family, member C	58	57	63	58.9	58	69	62	62.6	63	62	67	64.1	94	85	89	89.1		1.06	1	1.1	0.8498	0	0	0		1.5	0.0374	1	1	0
236539_at	PTPN22	26191	protein tyrosine phosphatase, non-receptor type 22 (lymphoid)	9	9	9	9.1	9	9	10	9.5	10	9	9	9.2	11	19	13	13.7		1.05	1	1	0.9631	0	0	0		1.5	0.351	0	0	0
40569_at	ZNF42	7593	zinc finger protein 42 (myeloid-specific retinoic acid-responsive)	114	134	128	125.2	122	171	126	138.3	127	126	132	128.2	204	192	174	189.3		1.1	1	1	0.9727	0	0	0		1.5	0.0817	1	1	0
206269_at	GCM1	8521	glial cells missing homolog 1 (Drosophila)	17	20	22	19.5	19	21	21	20	22	18	23	21	25	33	32	29.5		1.03	1	1.1	0.9593	0	0	0		1.5	0.2219	0	0	0
229257_at	KIAA1856	84629	KIAA1856 protein	58	65	64	62.3	61	54	74	62.5	56	62	62	60	94	104	85	94.1		1	1	-1	0.9572	0	0	0		1.5	0.0826	1	1	0
206359_at	SOCS3	9021	suppressor of cytokine signaling 3	38	39	37	38.1	36	51	33	39.4	32	35	34	33.3	64	55	55	57.6		1.03	1	-1.1	0.5926	0	0	0		1.5	0.0582	1	1	0
222703_s_at	YRDC	79693	yrdC domain containing (E.coli)	92	95	101	95.9	88	107	102	98.7	93	101	110	101.2	137	148	150	144.8		1.03	1	1.1	0.9404	0	0	0		1.5	0.0263	1	1	0
213017_at	ABHD3	171586	abhydrolase domain containing 3	200	201	201	200.4	199	170	199	188.7	205	224	208	212.3	208	380	351	302.6		-1.06	1	1.1	0.8466	0	0	0		1.5	0.4093	0	0	0
210355_at	PTHLH	5744	parathyroid hormone-like hormone	22	20	19	20.1	20	17	19	18.8	21	20	21	20.7	26	29	38	30.4		-1.07	1	1	0.9631	0	0	0		1.5	0.2201	0	0	0
208363_s_at	INPP4A	3631	inositol polyphosphate-4-phosphatase, type I, 107kDa	30	27	31	29.1	25	40	29	30.5	30	28	32	29.9	39	48	45	43.9		1.05	1	1	0.9769	0	0	0		1.5	0.0955	1	1	0
203372_s_at	SOCS2	8835	suppressor of cytokine signaling 2	18	18	18	18.1	17	18	20	18.4	32	29	23	27.7	23	26	34	27.3		1.02	1	1.5	0.5765	0	0	0		1.5	0.2274	0	0	0
202451_at	GTF2H1	2965	general transcription factor IIH, polypeptide 1, 62kDa	216	212	228	218.5	200	177	224	199.3	197	231	203	209.9	292	347	353	329.3		-1.1	1	-1	0.9568	0	0	0		1.5	0.0768	1	1	0
231297_at	DOT1L	84444	DOT1-like, histone H3 methyltransferase (S. cerevisiae)	43	40	35	39.1	33	40	35	35.8	36	35	38	36.5	77	58	46	58.9		-1.09	1	-1.1	0.9198	0	0	0		1.5	0.3287	0	0	0
238804_at	LOC440998	440998	LOC440998	19	19	19	19.4	24	32	19	24.7	24	18	21	20.7	29	28	30	29.2		1.27	1	1.1	0.9451	0	0	0		1.5	0.0102	1	1	0
223982_s_at	IPLA2(GAMMA)	50640	intracellular membrane-associated calcium-independent phospholipase A2 gamma	255	239	260	251.4	259	217	268	247.1	266	285	255	268.6	353	397	387	378.7		-1.02	1	1.1	0.8951	0	0	0		1.5	0.0381	1	1	0
204651_at	NRF1	4899	nuclear respiratory factor 1	60	60	66	61.9	57	47	66	56.4	66	64	72	67.2	81	98	102	93.2		-1.1	1	1.1	0.8903	0	0	0		1.5	0.1073	1	1	0
240983_s_at	CARS	833	cysteinyl-tRNA synthetase	50	56	55	53.5	60	49	51	53.1	55	45	52	50.4	57	91	100	80.5		-1.01	1	-1.1	0.9451	0	0	0		1.5	0.3733	0	0	0
218372_at	MED9	55090	mediator of RNA polymerase II transcription, subunit 9 homolog (yeast)	50	53	58	53.4	52	63	69	60.8	60	53	61	57.9	95	75	73	80.3		1.14	1	1.1	0.9054	0	0	0		1.5	0.147	1	1	0
219515_at	PRDM10	56980	PR domain containing 10	49	44	47	46.6	51	28	48	40.9	54	68	53	58	64	68	79	70.1		-1.14	1	1.2	0.8114	0	0	0		1.5	0.0917	1	1	0
214590_s_at	UBE2D1	7321	ubiquitin-conjugating enzyme E2D 1 (UBC4/5 homolog, yeast)	52	46	48	48.5	51	38	53	47	39	54	61	50.4	45	87	98	72.9		-1.03	1	1	0.9841	0	0	0		1.5	0.5264	0	0	0
211936_at	HSPA5	3309	heat shock 70kDa protein 5 (glucose-regulated protein, 78kDa)	2035	2040	1997	2023.7	2029	1969	2018	2005.3	1836	1992	2102	1973.5	2819	3130	3191	3042.2		-1.01	1	-1	0.9631	0	0	0		1.5	0.0303	1	1	0
213026_at	ATG12	9140	ATG12 autophagy related 12 homolog (S. cerevisiae)	298	295	319	303.8	305	253	370	305.5	337	353	314	334.4	442	452	477	456.7		1.01	1	1.1	0.8379	0	0	0		1.5	0.0228	1	1	0
202547_s_at	ARHGEF7	8874	Rho guanine nucleotide exchange factor (GEF) 7	38	35	38	37.2	37	25	30	30.2	41	40	40	40.3	57	58	53	55.9		-1.23	1	1.1	0.776	0	0	0		1.5	0.0224	1	1	0
204958_at	PLK3	1263	polo-like kinase 3 (Drosophila)	40	35	37	37	35	31	30	31.8	31	32	29	30.8	57	56	54	55.7		-1.16	1	-1.2	0.7181	0	0	0		1.5	0.0358	1	1	0
237289_at	CREB1	1385	CAMP responsive element binding protein 1	72	60	70	67	68	64	72	67.9	67	76	73	71.9	90	111	101	100.6		1.01	1	1.1	0.9365	0	0	0		1.5	0.1218	1	1	0
225818_s_at	TBRG1	84897	transforming growth factor beta regulator 1	46	68	65	59	57	72	71	66.6	73	74	68	71.4	95	82	88	88.7		1.13	1	1.2	0.899	0	0	0		1.5	0.2481	0	0	0
219286_s_at	RBM15	64783	RNA binding motif protein 15	332	325	334	330.4	325	283	375	325.8	340	346	334	340	498	483	509	496.2		-1.01	1	1	0.8493	0	0	0		1.5	0.0066	1	1	0
241762_at				15	16	16	15.8	17	15	17	16.3	15	17	14	15.5	20	22	30	23.7		1.03	1	-1	0.9814	0	0	0		1.5	0.2369	0	0	0
218564_at	RFWD3	55159	ring finger and WD repeat domain 3	114	127	134	124.8	125	92	131	114.8	143	142	131	138.4	171	204	188	187.3		-1.09	1	1.1	0.8702	0	0	0		1.5	0.0869	1	1	0
228588_s_at	UBE2B	7320	ubiquitin-conjugating enzyme E2B (RAD6 homolog)	412	338	405	383.6	398	323	412	375.3	469	437	380	427	661	555	521	575.9		-1.02	1	1.1	0.9199	0	0	0		1.5	0.1517	0	0	0
225799_at	MGC4677 /// LOC541471	112597 /// 541471	hypothetical protein MGC4677 /// hypothetical LOC541471	551	545	576	557.3	558	553	573	561.1	625	601	589	604.8	886	807	818	836.5		1.01	1	1.1	0.7291	0	0	0		1.5	0.0229	1	1	0
227538_at	CRSP7	9441	cofactor required for Sp1 transcriptional activation, subunit 7, 70kDa	95	109	101	101.6	93	80	106	92.4	99	102	98	99.4	147	159	151	152.5		-1.1	1	-1	0.9695	0	0	0		1.5	0.0431	1	1	0
221972_s_at	SDF4	51150	stromal cell derived factor 4	77	108	91	91.3	98	86	108	97	81	95	108	94.2	121	136	157	136.9		1.06	1	1	0.9859	0	0	0		1.5	0.2404	0	0	0
212533_at	WEE1	7465	WEE1 homolog (S. pombe)	342	319	332	330.9	316	277	328	306.3	318	342	322	327.5	474	491	525	496.4		-1.08	1	-1	0.9796	0	0	0		1.5	0.0261	1	1	0
228793_at	JMJD1C	221037	jumonji domain containing 1C	61	50	60	56.7	62	40	66	54.7	40	53	51	47.4	58	93	114	85		-1.04	1	-1.2	0.8915	0	0	0		1.5	0.4589	0	0	0
211171_s_at	PDE10A	10846	phosphodiesterase 10A	29	26	29	27.9	28	34	30	30.5	28	32	28	29	34	50	43	41.9		1.09	1	1	0.9631	0	0	0		1.5	0.2169	0	0	0
221230_s_at	ARID4B	51742	AT rich interactive domain 4B (RBP1- like) /// AT rich interactive domain 4B (RBP1- like)	328	302	305	311.6	308	240	333	291.1	309	348	331	329.2	404	514	491	467.3		-1.07	1	1.1	0.9149	0	0	0		1.5	0.1093	1	1	0
204433_s_at	SPATA2	9825	spermatogenesis associated 2	52	57	66	58	55	45	58	52.3	54	56	46	51.8	78	83	101	87		-1.11	1	-1.1	0.9199	0	0	0		1.5	0.1793	0	0	0
228184_at	DISP1	84976	dispatched homolog 1 (Drosophila)	26	31	31	29.1	33	28	27	29.2	28	35	28	30.1	44	45	42	43.6		1	1	1	0.9805	0	0	0		1.5	0.0862	1	1	0
219224_x_at	ZNF408	79797	zinc finger protein 408	138	132	133	134.4	127	147	135	136.4	137	150	144	143.8	232	189	187	201.3		1.01	1	1.1	0.8361	0	0	0		1.5	0.094	1	1	0
1559026_at			CDNA clone IMAGE:5295490	19	18	18	18.5	21	21	23	21.8	21	24	23	22.6	23	29	31	27.7		1.18	1	1.2	0.6151	0	0	0		1.5	0.1288	1	1	0
226050_at	TMCO3	55002	transmembrane and coiled-coil domains 3	214	201	209	207.5	215	202	222	212.9	185	231	209	207.5	255	323	365	310.8		1.03	1	-1	0.9997	0	0	0		1.5	0.1871	0	0	0
212619_at	KIAA0286	23306	KIAA0286 protein	37	41	38	38.5	29	27	39	31.2	37	37	34	35.9	44	59	74	57.6		-1.23	1	-1.1	0.899	0	0	0		1.5	0.3275	0	0	0
223324_s_at	TRPM7	54822	transient receptor potential cation channel, subfamily M, member 7	66	69	69	68	69	42	68	58.2	63	70	66	66.4	78	119	113	101.8		-1.17	1	-1	0.9569	0	0	0		1.5	0.2634	0	0	0
222270_at	SMEK2	57223	KIAA1387 protein	33	36	30	33	39	28	37	34.4	39	39	45	40.6	36	59	56	49.4		1.04	1	1.2	0.7846	0	0	0		1.5	0.3534	0	0	0
212974_at	DENND3	22898	DENN/MADD domain containing 3	31	28	30	29.8	26	26	31	27.7	30	30	30	29.8	38	44	53	44.6		-1.08	1	-1	0.9927	0	0	0		1.5	0.1782	0	0	0
230435_at	FLJ30851	375190	FLJ30851 protein	45	53	52	49.6	52	52	55	52.9	48	52	53	51.3	62	79	83	74.3		1.06	1	1	0.9698	0	0	0		1.5	0.186	0	0	0
224480_s_at	MGC11324	84803	hypothetical protein MGC11324 /// hypothetical protein MGC11324	169	180	190	179.4	169	132	179	159	149	170	189	168.8	230	279	300	268.3		-1.13	1	-1.1	0.9542	0	0	0		1.5	0.1292	1	1	0
236083_at			Transcribed locus	19	19	19	19.2	19	16	21	18.8	20	18	19	19	28	27	32	28.7		-1.02	1	-1	0.9829	0	0	0		1.5	0.069	1	1	0
212434_at	GRPEL1	80273	GrpE-like 1, mitochondrial (E. coli)	109	124	125	119.1	121	104	122	115.5	131	129	128	129.5	172	179	183	177.9		-1.03	1	1.1	0.8721	0	0	0		1.5	0.0458	1	1	0
209378_s_at	KIAA1128	54462	KIAA1128	60	66	69	64.8	65	65	68	66.3	63	70	65	66.1	92	103	96	96.8		1.02	1	1	0.9774	0	0	0		1.5	0.0598	1	1	0
212535_at	MEF2A	4205	MADS box transcription enhancer factor 2, polypeptide A (myocyte enhancer factor 2A)	111	111	115	112.2	109	90	123	106.6	113	117	117	115.7	145	180	181	167.7		-1.05	1	1	0.8768	0	0	0		1.5	0.1021	1	1	0
223484_at	NMES1	84419	normal mucosa of esophagus specific 1	17	18	20	18.4	17	21	19	19	23	22	21	22.1	22	29	32	27.4		1.04	1	1.2	0.7478	0	0	0		1.5	0.234	0	0	0
207746_at	POLQ	10721	polymerase (DNA directed), theta	35	36	40	37	43	40	34	38.8	46	39	44	43	52	57	57	55.2		1.05	1	1.2	0.826	0	0	0		1.5	0.0497	1	1	0
1555680_a_at	SMOX	54498	spermine oxidase	56	62	54	57.2	64	61	66	63.5	56	65	71	63.7	85	91	81	85.4		1.11	1	1.1	0.9067	0	0	0		1.5	0.0655	1	1	0
202140_s_at	CLK3	1198	CDC-like kinase 3	133	153	151	145.4	143	168	168	159.3	141	152	141	144.7	243	197	214	217.1		1.1	1	-1	0.9934	0	0	0		1.5	0.1061	1	1	0
231966_at	PPP1R9A	55607	protein phosphatase 1, regulatory (inhibitor) subunit 9A	18	18	20	18.5	18	14	15	15.5	18	20	16	17.9	23	33	28	27.6		-1.19	1	-1	0.9749	0	0	0		1.5	0.1924	0	0	0
227179_at	STAU2	27067	staufen, RNA binding protein, homolog 2 (Drosophila)	43	47	39	42.7	46	44	46	45.3	41	43	45	42.8	57	63	72	63.7		1.06	1	1	0.999	0	0	0		1.5	0.1415	1	1	0
209069_s_at	H3F3B	3021	H3 histone, family 3B (H3.3B)	2825	2875	3073	2922.4	2998	3049	3119	3055	3024	3104	3025	3050.7	4118	4399	4576	4360.2		1.05	1	1	0.8926	0	0	0		1.5	0.0331	1	1	0
1555830_s_at	FAM62B	57488	family with sequence similarity 62 (C2 domain containing) member B	38	46	39	41.1	43	32	46	39.8	38	35	41	37.8	46	70	72	61.3		-1.03	1	-1.1	0.9241	0	0	0		1.5	0.3384	0	0	0
227035_x_at	LOC441212	441212	PNAS-13	131	130	139	133.3	132	153	128	137.6	164	140	144	148.9	200	203	194	198.9		1.03	1	1.1	0.8555	0	0	0		1.5	0.0148	1	1	0
215150_at	YOD1	55432	YOD1 OTU deubiquinating enzyme 1 homolog ( yeast)	14	16	16	15.3	14	14	18	15.2	16	16	19	16.7	16	27	26	22.8		-1	1	1.1	0.9138	0	0	0		1.5	0.3657	0	0	0
227833_s_at	MBD6	114785	methyl-CpG binding domain protein 6	89	81	85	85.1	89	70	99	85.2	80	89	96	88.3	122	127	132	126.8		1	1	1	0.9657	0	0	0		1.5	0.0255	1	1	0
219256_s_at	SH3TC1	54436	SH3 domain and tetratricopeptide repeats 1	44	43	44	43.7	38	58	46	46.7	38	46	48	43.8	65	58	72	65.1		1.07	1	1	0.9989	0	0	0		1.5	0.0737	1	1	0
221193_s_at	ZCCHC10	54819	zinc finger, CCHC domain containing 10	109	111	117	112.1	106	93	113	103.7	108	121	114	114.3	125	177	210	167		-1.08	1	1	0.9703	0	0	0		1.5	0.3314	0	0	0
211913_s_at	MERTK	10461	c-mer proto-oncogene tyrosine kinase /// c-mer proto-oncogene tyrosine kinase	24	29	23	25.2	24	34	31	29.3	22	30	24	25.3	41	34	38	37.6		1.16	1	1	0.9993	0	0	0		1.5	0.1525	0	0	0
202543_s_at	GMFB	2764	glia maturation factor, beta	250	250	256	252.1	231	204	261	230.8	229	250	239	239.1	325	419	389	375.5		-1.09	1	-1.1	0.8636	0	0	0		1.5	0.1084	1	1	0
209593_s_at	TOR1B	27348	torsin family 1, member B (torsin B)	181	176	174	176.8	181	156	179	171.6	154	140	167	153.3	228	277	289	263.4		-1.03	1	-1.2	0.792	0	0	0		1.5	0.1016	1	1	0
225702_at	C8orf76	84933	chromosome 8 open reading frame 76	121	116	121	119.2	122	104	131	118.5	110	132	128	122.9	135	198	209	177.6		-1.01	1	1	0.9703	0	0	0		1.5	0.2826	0	0	0
212019_at	RSL1D1	26156	ribosomal L1 domain containing 1	57	66	67	63.3	68	54	71	63.8	59	67	63	62.6	86	98	99	94.2		1.01	1	-1	0.9899	0	0	0		1.5	0.0895	1	1	0
227018_at	DPP8	54878	dipeptidylpeptidase 8	99	121	117	111.7	109	105	119	110.9	98	107	111	105.2	147	169	185	166.3		-1.01	1	-1.1	0.9534	0	0	0		1.5	0.1494	1	1	0
230511_at	CREM	1390	cAMP responsive element modulator	44	47	48	46.4	50	47	47	47.8	49	47	47	47.4	61	68	79	69		1.03	1	1	0.9589	0	0	0		1.5	0.1152	1	1	0
217176_s_at	ZFX	7543	zinc finger protein, X-linked	19	19	13	16.8	17	16	17	16.6	19	18	18	18.3	18	31	27	24.9		-1.01	1	1.1	0.9568	0	0	0		1.5	0.4262	0	0	0
1553338_at	C1orf55	163859	chromosome 1 open reading frame 55	27	27	25	26.4	27	27	25	26.3	28	26	21	24.8	32	40	46	39.2		-1	1	-1.1	0.9593	0	0	0		1.5	0.206	0	0	0
242931_at			Transcribed locus	90	110	123	106.6	99	80	114	96.6	110	101	110	106.9	160	163	153	158.5		-1.1	1	1	0.9984	0	0	0		1.5	0.1543	0	0	0
208901_s_at	TOP1	7150	topoisomerase (DNA) I	437	420	438	431.7	399	401	448	415.3	433	429	419	426.8	630	653	643	641.7		-1.04	1	-1	0.9614	0	0	0		1.5	0.0068	1	1	0
206110_at	HIST1H3H	8357	histone 1, H3h	30	41	40	37.1	40	39	41	39.7	32	36	37	35.1	46	60	61	55.1		1.07	1	-1.1	0.9703	0	0	0		1.5	0.2683	0	0	0
203893_at	TAF9	6880	TAF9 RNA polymerase II, TATA box binding protein (TBP)-associated factor, 32kDa	431	454	438	440.7	420	371	425	404.9	398	416	423	412.4	644	660	661	655.1		-1.09	1	-1.1	0.791	0	0	0		1.5	0.0072	1	1	0
46270_at	UBAP1	51271	ubiquitin associated protein 1	169	193	173	178.2	174	164	180	172.5	165	181	189	177.9	228	276	294	264.7		-1.03	1	-1	0.9989	0	0	0		1.5	0.1338	1	1	0
219164_s_at	C14orf103	55102	chromosome 14 open reading frame 103	42	49	53	47.8	45	30	60	43.4	49	47	37	44.1	52	81	85	71		-1.1	1	-1.1	0.9572	0	0	0		1.5	0.378	0	0	0
204538_x_at	NPIP /// LOC339047 /// LOC440341	339047 /// 440341 /// 9284	nuclear pore complex interacting protein /// hypothetical protein LOC339047 /// similar to hypothetical protein LOC339047	327	308	332	322.2	334	352	312	332.3	377	334	361	357	521	449	468	478.6		1.03	1	1.1	0.8287	0	0	0		1.5	0.0517	1	1	0
224726_at	MIB1	57534	mindbomb homolog 1 (Drosophila)	161	163	157	160.3	150	134	174	151.7	174	161	157	163.6	221	239	255	238.1		-1.06	1	1	0.9655	0	0	0		1.5	0.0385	1	1	0
223997_at	KIAA1961	96459	KIAA1961 gene	17	21	17	18.3	19	21	20	19.9	21	20	19	19.8	27	29	26	27.2		1.08	1	1.1	0.9177	0	0	0		1.5	0.0894	1	1	0
222145_at		440345	Hypothetical protein LOC440345	16	15	17	15.9	19	19	18	18.6	19	18	19	18.8	24	20	28	23.6		1.17	1	1.2	0.5173	0	0	0		1.5	0.1583	0	0	0
228008_at			CDNA clone IMAGE:3462401	43	43	50	45.5	38	49	43	43.3	43	47	45	45	71	61	72	67.6		-1.05	1	-1	0.986	0	0	0		1.5	0.0995	1	1	0
203321_s_at	KIAA0863	22850	KIAA0863 protein	274	294	326	297.1	309	297	350	317.6	307	322	331	320	428	435	460	440.9		1.07	1	1.1	0.9102	0	0	0		1.5	0.0617	1	1	0
32091_at	KIAA0446	9673	KIAA0446 gene product	297	342	334	323.7	302	298	318	306.1	303	326	315	314.3	451	479	513	480.1		-1.06	1	-1	0.966	0	0	0		1.5	0.0678	1	1	0
212266_s_at	SFRS5	6430	splicing factor, arginine/serine-rich 5	469	452	442	454.2	460	491	473	474.5	478	497	481	485.1	702	650	670	673.8		1.04	1	1.1	0.7689	0	0	0		1.5	0.018	1	1	0
209406_at	BAG2	9532	BCL2-associated athanogene 2	235	241	248	241.1	234	198	250	226.1	262	270	279	270.3	322	378	376	357.7		-1.07	1	1.1	0.5787	0	0	0		1.5	0.0621	1	1	0
212840_at	KIAA0794	26043	KIAA0794 protein	88	99	96	94.4	86	80	103	89.2	84	88	77	83	112	154	158	140		-1.06	1	-1.1	0.8361	0	0	0		1.5	0.2233	0	0	0
240991_at		392271	Similar to 60S ribosomal protein L32	54	47	47	48.9	51	34	52	44.9	36	42	41	39.4	68	76	74	72.5		-1.09	1	-1.2	0.7629	0	0	0		1.5	0.0638	1	1	0
225383_at	ZNF275	10838	zinc finger protein 275	157	169	175	166.7	180	165	186	176.7	209	224	210	214.1	226	254	263	247.2		1.06	1	1.3	0.4625	0	0	0		1.5	0.0617	1	1	0
202684_s_at	RNMT	8731	RNA (guanine-7-) methyltransferase	33	27	29	29.5	31	25	30	28.7	24	35	33	30.5	31	44	62	43.7		-1.03	1	1	0.985	0	0	0		1.5	0.4838	0	0	0
226267_at	JDP2	122953	jun dimerization protein 2	66	74	66	68.5	60	61	62	60.9	76	78	76	76.7	100	99	105	101.4		-1.12	1	1.1	0.7781	0	0	0		1.5	0.036	1	1	0
1555851_s_at	SEPW1	6415	selenoprotein W, 1	504	613	613	574.5	563	581	599	580.6	617	651	604	623.6	831	884	839	850.8		1.01	1	1.1	0.9215	0	0	0		1.5	0.0905	1	1	0
229068_at	CCT5	22948	chaperonin containing TCP1, subunit 5 (epsilon)	66	80	87	77.3	80	63	83	75	73	89	84	81.9	96	118	133	114.5		-1.03	1	1.1	0.9676	0	0	0		1.5	0.2528	0	0	0
225296_at	ZNF317	57693	zinc finger protein 317	105	140	133	124.9	139	125	152	138.4	139	152	151	147.2	144	197	222	184.9		1.11	1	1.2	0.8814	0	0	0		1.5	0.3488	0	0	0
209050_s_at	RALGDS	5900	ral guanine nucleotide dissociation stimulator	74	83	81	79.3	74	72	79	74.9	80	85	80	81.9	113	121	119	117.4		-1.06	1	1	0.9556	0	0	0		1.5	0.0366	1	1	0
1555785_a_at	XRN1	54464	5'-3' exoribonuclease 1	17	18	15	16.7	18	14	18	16.4	20	18	17	18	16	29	33	24.8		-1.02	1	1.1	0.9356	0	0	0		1.5	0.5152	0	0	0
227991_x_at	ZNF297B	23099	Zinc finger protein 297B	39	38	38	38.3	38	35	42	38	39	43	38	40.4	58	49	64	56.7		-1.01	1	1.1	0.9072	0	0	0		1.5	0.1245	1	1	0
222458_s_at	C1orf108	79647	chromosome 1 open reading frame 108	68	83	80	76.8	77	53	78	68.2	75	80	82	79	89	124	133	113.5		-1.13	1	1	0.977	0	0	0		1.5	0.2893	0	0	0
215501_s_at	DUSP10	11221	dual specificity phosphatase 10	26	32	30	29.3	28	24	25	25.6	31	27	30	29.2	39	42	50	43.4		-1.15	1	-1	0.9961	0	0	0		1.5	0.1529	0	0	0
203094_at	MAD2L1BP	9587	MAD2L1 binding protein	144	155	150	149.5	134	127	157	139	147	142	142	143.3	229	206	228	221		-1.08	1	-1	0.8883	0	0	0		1.5	0.0361	1	1	0
203741_s_at	ADCY7	113	adenylate cyclase 7	63	57	50	56.4	61	28	51	44.3	53	56	55	54.8	64	96	94	83.3		-1.27	1	-1	0.9771	0	0	0		1.5	0.3219	0	0	0
223169_s_at	RHOU	58480	ras homolog gene family, member U	29	31	33	31.1	25	29	28	27.2	29	32	35	31.8	44	43	52	45.9		-1.14	1	1	0.98	0	0	0		1.5	0.09	1	1	0
203429_s_at	C1orf9	51430	chromosome 1 open reading frame 9	111	109	124	114.5	124	96	131	115.9	117	131	130	125.8	138	192	183	169		1.01	1	1.1	0.8876	0	0	0		1.5	0.2098	0	0	0
209209_s_at	PLEKHC1	10979	pleckstrin homology domain containing, family C (with FERM domain) member 1	91	104	82	92.2	92	65	107	86.6	88	87	94	89.5	107	149	158	136.1		-1.06	1	-1	0.9774	0	0	0		1.5	0.2961	0	0	0
207064_s_at	AOC2	314	amine oxidase, copper containing 2 (retina-specific)	27	22	26	24.6	29	20	22	23.5	29	23	25	25.7	32	40	38	36.4		-1.05	1	1	0.9742	0	0	0		1.5	0.1412	1	1	0
213720_s_at	SMARCA4	6597	SWI/SNF related, matrix associated, actin dependent regulator of chromatin, subfamily a, member 4	20	23	23	21.9	27	38	29	31	27	30	27	28.1	30	30	38	32.3		1.42	1	1.3	0.6831	0	0	0		1.5	0.1773	0	0	0
238633_at	EPC1	80314	Enhancer of polycomb homolog 1 (Drosophila)	23	24	25	24.1	28	20	28	25	30	26	28	27.7	31	32	45	35.5		1.04	1	1.2	0.7796	0	0	0		1.5	0.2457	0	0	0
238512_at	CAPZA1	829	Capping protein (actin filament) muscle Z-line, alpha 1	13	11	13	12.3	13	12	14	13	13	13	14	13.1	15	19	21	18.2		1.06	1	1.1	0.9412	0	0	0		1.5	0.25	0	0	0
220319_s_at	MYLIP	29116	myosin regulatory light chain interacting protein	62	68	59	62.8	64	66	75	68	62	65	64	63.4	79	99	102	92.6		1.08	1	1	0.9855	0	0	0		1.5	0.1491	1	1	0
207705_s_at	KIAA0980	22981	KIAA0980 protein	75	69	78	73.8	73	65	80	72.6	71	75	77	74.5	99	117	112	108.9		-1.02	1	1	0.9871	0	0	0		1.5	0.078	1	1	0
203643_at	ERF	2077	Ets2 repressor factor	145	160	164	156	134	131	122	129	129	142	135	135.7	191	230	277	230.1		-1.21	1	-1.1	0.7786	0	0	0		1.5	0.2196	0	0	0
220124_at	GAN	8139	giant axonal neuropathy (gigaxonin)	19	17	16	17.2	17	12	15	14.3	18	16	18	17.4	21	25	31	25.3		-1.2	1	1	0.9868	0	0	0		1.5	0.2507	0	0	0
204413_at	TRAF2	7186	TNF receptor-associated factor 2	59	62	53	57.9	60	66	61	62.3	69	66	69	67.9	90	83	83	85.3		1.08	1	1.2	0.7145	0	0	0		1.5	0.0556	1	1	0
1554007_at				45	42	49	45	46	30	47	40.2	82	77	70	76.3	57	71	71	66.3		-1.12	1	1.7	0.3884	0	0	0		1.5	0.1338	1	1	0
223297_at	MGC4268	83607	hypothetical protein MGC4268	163	174	179	171.7	159	147	171	159	178	174	183	178.4	227	267	268	252.9		-1.08	1	1	0.9179	0	0	0		1.5	0.0781	1	1	0
204121_at	GADD45G	10912	growth arrest and DNA-damage-inducible, gamma	23	28	26	25.7	23	31	30	27.8	28	26	28	27.2	49	38	29	37.8		1.08	1	1.1	0.944	0	0	0		1.5	0.3525	0	0	0
1558699_a_at	FLJ22313	64224	hypothetical protein FLJ22313	28	31	29	29.3	29	18	34	25.8	25	27	25	25.9	28	52	55	43.1		-1.14	1	-1.1	0.6632	0	0	0		1.5	0.5098	0	0	0
225848_at	FLJ31413	155061	hypothetical protein FLJ31413	117	128	127	123.9	120	105	142	121.8	133	147	165	147.5	164	189	196	182.5		-1.02	1	1.2	0.8205	0	0	0		1.5	0.078	1	1	0
227410_at	FAM43A	131583	family with sequence similarity 43, member A	37	38	35	36.7	38	22	33	30.4	41	36	38	38.4	55	50	57	54		-1.21	1	1	0.9322	0	0	0		1.5	0.0383	1	1	0
203108_at	GPRC5A	9052	G protein-coupled receptor, family C, group 5, member A	647	749	728	706.8	690	695	724	702.9	898	819	794	835.8	1051	988	1085	1040.5		-1.01	1	1.2	0.7847	0	0	0		1.5	0.0597	1	1	0
233329_s_at	LOC51315	51315	hypothetical protein LOC51315	132	129	135	132.1	142	114	142	131.9	157	175	154	161.8	165	214	208	194.5		-1	1	1.2	0.5673	0	0	0		1.5	0.1298	1	1	0
239648_at	DCUN1D3	123879	DCN1, defective in cullin neddylation 1, domain containing 3 (S. cerevisiae)	48	50	56	51.4	53	54	56	54.3	40	58	51	49	54	84	95	75.6		1.06	1	-1	0.9769	0	0	0		1.5	0.4035	0	0	0
201995_at	EXT1	2131	exostoses (multiple) 1	173	212	205	195.8	197	205	202	201.3	179	183	199	186.9	282	286	297	288.1		1.03	1	-1	0.9617	0	0	0		1.5	0.0847	1	1	0
214748_at	LOC88523	88523	CG016	38	31	37	35.2	34	32	38	34.4	41	46	37	41	49	53	54	51.8		-1.02	1	1.2	0.8912	0	0	0		1.5	0.1073	1	1	0
203957_at	E2F6	1876	E2F transcription factor 6	175	170	191	178.3	175	174	179	176.2	155	179	183	172.2	236	276	277	262.4		-1.01	1	-1	0.968	0	0	0		1.5	0.0819	1	1	0
223309_x_at	IPLA2(GAMMA)	50640	intracellular membrane-associated calcium-independent phospholipase A2 gamma	156	154	169	159.3	161	149	172	160.6	165	165	160	163.1	239	218	247	234.4		1.01	1	1	0.9565	0	0	0		1.5	0.0497	1	1	0
218399_s_at	CDCA4	55038	cell division cycle associated 4	196	201	204	200.4	206	176	183	187.9	207	206	198	203.3	304	283	297	294.7		-1.07	1	1	0.9519	0	0	0		1.5	0.0129	1	1	0
204524_at	PDPK1	5170	3-phosphoinositide dependent protein kinase-1	77	95	95	88.6	89	99	110	98.9	83	89	96	89	103	131	164	130.2		1.12	1	1	0.9964	0	0	0		1.5	0.3391	0	0	0
1554327_a_at	CANT1	124583	calcium activated nucleotidase 1	54	52	43	49.4	56	46	52	51.3	50	53	51	51.5	73	77	68	72.7		1.04	1	1	0.9662	0	0	0		1.5	0.1119	1	1	0
206237_s_at	NRG1	3084	neuregulin 1	51	57	71	59.2	60	79	67	68.2	64	73	72	69.6	81	89	92	87		1.15	1	1.2	0.8951	0	0	0		1.5	0.1806	0	0	0
201155_s_at	MFN2	9927	mitofusin 2	115	141	130	128.6	112	121	145	125.1	135	128	134	132.6	198	180	190	188.9		-1.03	1	1	0.9703	0	0	0		1.5	0.0869	1	1	0
216205_s_at	MFN2	9927	mitofusin 2	42	51	39	43.8	40	46	45	43.8	44	46	43	44.3	64	60	70	64.4		-1	1	1	0.9923	0	0	0		1.5	0.1595	0	0	0
209179_s_at	LENG4	79143	leukocyte receptor cluster (LRC) member 4	220	254	251	241.1	248	238	258	247.9	252	248	266	255.1	388	330	347	354.3		1.03	1	1.1	0.9261	0	0	0		1.5	0.0881	1	1	0
1553709_a_at	PRPF38A	84950	PRP38 pre-mRNA processing factor 38 (yeast) domain containing A	96	115	111	107.2	95	109	109	104.2	96	113	106	104.6	150	156	168	157.5		-1.03	1	-1	0.9796	0	0	0		1.5	0.084	1	1	0
209578_s_at	POFUT2	23275	protein O-fucosyltransferase 2	54	67	66	62	60	49	59	56	55	67	61	60.7	99	89	86	91.1		-1.11	1	-1	0.986	0	0	0		1.5	0.1326	1	1	0
235857_at	KCTD11	147040	potassium channel tetramerisation domain containing 11	43	48	40	43.6	39	42	48	42.8	52	46	47	48.5	50	78	67	64		-1.02	1	1.1	0.8915	0	0	0		1.5	0.3024	0	0	0
209674_at	CRY1	1407	cryptochrome 1 (photolyase-like)	97	101	109	102	92	68	103	86.4	101	113	116	109.9	93	187	193	149.9		-1.18	1	1.1	0.904	0	0	0		1.5	0.5524	0	0	0
218152_at	HMG20A	10363	high-mobility group 20A	186	197	193	191.9	199	197	190	195.5	197	223	209	209.5	274	279	292	281.7		1.02	1	1.1	0.8396	0	0	0		1.5	0.0167	1	1	0
221803_s_at	NRBF2	29982	nuclear receptor binding factor 2	137	149	149	145.1	145	126	160	143	119	140	147	134.9	156	242	255	213		-1.01	1	-1.1	0.9329	0	0	0		1.5	0.3593	0	0	0
241366_at		441191	Similar to hypothetical protein FLJ10307	17	17	20	17.9	20	14	23	18.5	20	25	23	22.3	20	28	32	26.2		1.04	1	1.2	0.827	0	0	0		1.5	0.3192	0	0	0
37254_at	ZNF133	7692	zinc finger protein 133 (clone pHZ-13)	63	70	74	68.7	75	59	81	71	77	86	85	82.5	83	104	119	100.8		1.03	1	1.2	0.7666	0	0	0		1.5	0.2322	0	0	0
1556582_at	LOC440536	440536	hypothetical gene supported by AK098812	133	114	119	121.7	123	114	108	114.8	121	131	114	122.1	183	194	160	178.6		-1.06	1	1	0.9961	0	0	0		1.5	0.1031	1	1	0
222527_s_at	RBM22	55696	RNA binding motif protein 22	117	122	125	121.3	129	111	124	121	144	146	138	142.9	167	182	185	178		-1	1	1.2	0.4617	0	0	0		1.5	0.0293	1	1	0
212201_at	KIAA0692	23141	KIAA0692 protein	94	102	97	97.6	98	100	106	101.4	104	111	110	108.4	124	140	168	143.1		1.04	1	1.1	0.755	0	0	0		1.5	0.1583	0	0	0
211844_s_at	NRP2	8828	neuropilin 2	38	40	39	39.1	39	41	45	41.7	45	38	42	41.6	53	61	58	57.3		1.07	1	1.1	0.904	0	0	0		1.5	0.0398	1	1	0
1567213_at	PNN	5411	pinin, desmosome associated protein	47	41	42	43.4	47	32	42	39.7	49	44	38	43.6	63	62	65	63.6		-1.09	1	1	0.9973	0	0	0		1.5	0.0464	1	1	0
1556051_a_at	BICD1	636	bicaudal D homolog 1 (Drosophila)	58	61	63	60.7	61	58	68	62.2	59	57	66	60.8	81	90	96	88.9		1.03	1	1	0.9982	0	0	0		1.5	0.0638	1	1	0
228098_s_at	MYLIP	29116	myosin regulatory light chain interacting protein	111	113	118	114	104	85	139	107.1	97	112	115	107.9	139	176	191	167		-1.06	1	-1.1	0.9404	0	0	0		1.5	0.1744	0	0	0
213934_s_at	ZNF19 /// ZNF23	7567 /// 7571	zinc finger protein 19 (KOX 12) /// zinc finger protein 23 (KOX 16)	40	40	44	41.5	40	28	35	34.3	45	58	47	49.5	47	64	74	60.7		-1.21	1	1.2	0.8585	0	0	0		1.5	0.3011	0	0	0
219848_s_at	ZNF432	9668	zinc finger protein 432	28	32	40	32.8	41	26	36	33.7	37	37	38	37.3	38	53	54	48		1.03	1	1.1	0.9171	0	0	0		1.5	0.3413	0	0	0
206060_s_at	PTPN22	26191	protein tyrosine phosphatase, non-receptor type 22 (lymphoid)	15	14	14	14.2	15	14	16	14.9	14	14	13	13.5	22	18	23	20.7		1.05	1	-1.1	0.9231	0	0	0		1.5	0.1113	1	1	0
212882_at	KLHL18	23276	kelch-like 18 (Drosophila)	52	55	53	53.4	51	32	50	43.5	57	54	60	57.2	71	87	77	78.1		-1.23	1	1.1	0.8581	0	0	0		1.5	0.085	1	1	0
205854_at	TULP3	7289	tubby like protein 3	214	225	213	217.5	216	187	230	210.2	233	226	236	231.8	318	312	324	318.1		-1.04	1	1.1	0.7817	0	0	0		1.5	0.0112	1	1	0
207349_s_at	UCP3	7352	uncoupling protein 3 (mitochondrial, proton carrier)	26	24	27	25.7	27	28	26	27.1	20	24	22	21.9	42	36	35	37.6		1.06	1	-1.2	0.8372	0	0	0		1.5	0.0951	1	1	0
208792_s_at	CLU	1191	clusterin (complement lysis inhibitor, SP-40,40, sulfated glycoprotein 2, testosterone-repressed prostate message 2, apolipoprotein J)	784	845	747	790.8	727	731	815	756.4	820	761	808	795.8	1078	1075	1334	1156.3		-1.05	1	1	0.9913	0	0	0		1.5	0.1264	1	1	0
222408_s_at	YPEL5	51646	yippee-like 5 (Drosophila)	331	335	333	333.3	348	329	333	336.3	353	331	333	338.9	482	507	472	487.1		1.01	1	1	0.952	0	0	0		1.5	0.0117	1	1	0
222989_s_at	UBQLN1	29979	ubiquilin 1	152	143	167	153.8	146	125	168	145.3	136	161	170	154.9	201	245	229	224.7		-1.06	1	1	0.9935	0	0	0		1.5	0.1098	1	1	0
224624_at	LRRC8A	56262	leucine rich repeat containing 8 family, member A	462	518	484	487.1	474	461	485	473.2	491	489	490	490	783	660	696	711.3		-1.03	1	1	0.9891	0	0	0		1.5	0.0791	1	1	0
228490_at	ABHD2	11057	abhydrolase domain containing 2	88	95	103	95.3	101	53	98	80.3	67	85	79	76.6	124	140	156	139.2		-1.19	1	-1.2	0.811	0	0	0		1.5	0.1317	1	1	0
223665_at	ARPM1	84517	actin related protein M1	34	45	39	39.2	42	27	44	36.8	44	41	43	42.6	51	58	64	57.3		-1.07	1	1.1	0.9398	0	0	0		1.5	0.2039	0	0	0
220018_at	CBLL1	79872	Cas-Br-M (murine) ecotropic retroviral transforming sequence-like 1	80	77	82	79.8	85	46	85	69.5	77	84	88	83.1	84	138	136	116.5		-1.15	1	1	0.9404	0	0	0		1.5	0.3811	0	0	0
237623_at			MRNA; cDNA DKFZp686L04236 (from clone DKFZp686L04236)	85	80	83	82.3	90	77	83	82.9	86	83	77	82	104	118	142	120.2		1.01	1	-1	0.9927	0	0	0		1.5	0.162	0	0	0
203985_at	ZNF212	7988	zinc finger protein 212	89	105	97	96.5	102	104	91	99.2	105	102	109	105	144	160	122	140.9		1.03	1	1.1	0.8926	0	0	0		1.5	0.1632	0	0	0
207001_x_at	TSC22D3	1831	TSC22 domain family, member 3	22	23	22	22.3	21	26	23	23.4	23	20	22	21.7	31	37	31	32.5		1.05	1	-1	0.9626	0	0	0		1.5	0.084	1	1	0
220967_s_at	ZNF696	79943	zinc finger protein 696 /// zinc finger protein 696	38	41	38	38.9	40	39	40	39.7	43	43	40	41.8	56	54	61	56.8		1.02	1	1.1	0.8111	0	0	0		1.5	0.0426	1	1	0
225657_at	LOC152217	152217	hypothetical protein BC007882	146	183	178	168.3	158	173	194	174.3	179	179	174	177.1	274	236	229	245.6		1.04	1	1.1	0.9595	0	0	0		1.5	0.1544	0	0	0
223329_x_at	SUGT1	10910	SGT1, suppressor of G2 allele of SKP1 (S. cerevisiae)	502	487	522	503.4	524	487	522	510.5	608	562	525	564.1	758	750	696	734.4		1.01	1	1.1	0.8272	0	0	0		1.5	0.0261	1	1	0
203096_s_at	RAPGEF2	9693	Rap guanine nucleotide exchange factor (GEF) 2	92	104	92	95.8	92	70	116	90.7	106	98	103	102.2	122	150	149	139.7		-1.06	1	1.1	0.9072	0	0	0		1.5	0.1228	1	1	0
228330_at	C6orf113	221302	chromosome 6 open reading frame 113	46	53	55	51	50	30	54	43	59	66	59	61.3	54	89	87	74.4		-1.19	1	1.2	0.8011	0	0	0		1.5	0.4097	0	0	0
227431_at	RSBN1L	222194	Round spermatid basic protein 1-like	53	52	56	53.8	56	58	61	58.2	54	58	64	58.6	72	79	85	78.4		1.08	1	1.1	0.8926	0	0	0		1.5	0.0681	1	1	0
225033_at	LOC286167	286167	hypothetical protein LOC286167	35	41	51	42	35	31	33	32.9	42	34	44	39.9	57	57	71	61.2		-1.27	1	-1.1	0.9774	0	0	0		1.5	0.2731	0	0	0
225152_at	ZNF622	90441	zinc finger protein 622	187	221	203	203.4	190	199	216	201.6	236	245	228	236.2	300	305	286	296.6		-1.01	1	1.2	0.791	0	0	0		1.5	0.0617	1	1	0
227329_at	BTBD4	140685	BTB (POZ) domain containing 4	22	18	21	20.2	24	20	21	21.4	22	23	21	21.7	23	33	33	29.5		1.06	1	1.1	0.9247	0	0	0		1.5	0.298	0	0	0
200667_at	UBE2D3	7323	ubiquitin-conjugating enzyme E2D 3 (UBC4/5 homolog, yeast)	424	408	428	420.2	439	354	433	407	377	435	430	412.9	549	621	673	612.4		-1.03	1	-1	0.9789	0	0	0		1.5	0.0804	1	1	0
226194_at	C13orf8	283489	chromosome 13 open reading frame 8	178	183	192	184.4	189	152	194	177.2	231	236	234	233.6	260	265	282	268.7		-1.04	1	1.3	0.3229	0	0	0		1.5	0.0258	1	1	0
209273_s_at	HBLD2	81689	HESB like domain containing 2	268	314	282	287.2	292	261	295	282.2	380	386	346	370.2	391	444	422	418.5		-1.02	1	1.3	0.6046	0	0	0		1.5	0.0762	1	1	0
222812_s_at	RHOF	54509	ras homolog gene family, member F (in filopodia)	45	53	56	50.8	56	56	55	55.6	44	51	54	49.5	71	72	79	74		1.09	1	-1	0.9842	0	0	0		1.5	0.1162	1	1	0
211961_s_at	RAB7	7879	RAB7, member RAS oncogene family	238	258	280	258.3	296	220	291	267	279	294	298	290.2	344	377	411	376.3		1.03	1	1.1	0.8379	0	0	0		1.5	0.1015	1	1	0
205876_at	LIFR	3977	leukemia inhibitory factor receptor	18	17	19	18	21	16	19	18.6	16	19	19	18	19	30	32	26.2		1.03	1	-1	0.9998	0	0	0		1.5	0.4062	0	0	0
222010_at	TCP1	6950	t-complex 1	185	204	194	194.2	193	171	202	188.3	181	208	205	197.6	263	305	282	282.8		-1.03	1	1	0.98	0	0	0		1.5	0.0612	1	1	0
203885_at	RAB21	23011	RAB21, member RAS oncogene family	258	265	247	256.5	263	235	268	255.1	278	279	275	277.5	360	381	379	373.2		-1.01	1	1.1	0.6847	0	0	0		1.5	0.0174	1	1	0
221215_s_at	RIPK4	54101	receptor-interacting serine-threonine kinase 4	107	103	103	104	98	97	95	96.7	110	104	101	105	162	143	150	151.3		-1.08	1	1	0.9794	0	0	0		1.5	0.0347	1	1	0
217970_s_at	CNOT6	57472	CCR4-NOT transcription complex, subunit 6	127	127	130	128.1	129	103	126	118.5	114	141	130	127.8	157	209	197	186.3		-1.08	1	-1	0.9976	0	0	0		1.5	0.1548	0	0	0
219437_s_at	ANKRD11	29123	ankyrin repeat domain 11	130	154	164	148.8	146	139	173	151.8	176	175	163	171.1	223	208	219	216.4		1.02	1	1.2	0.8662	0	0	0		1.5	0.1074	1	1	0
207667_s_at	MAP2K3	5606	mitogen-activated protein kinase kinase 3	138	144	151	144.3	141	148	146	145.1	137	135	154	141.8	225	208	198	209.8		1.01	1	-1	0.9788	0	0	0		1.5	0.0446	1	1	0
1552685_a_at	GRHL1	29841	grainyhead-like 1 (Drosophila)	34	38	36	36.1	38	36	38	37.3	40	43	42	41.5	46	56	56	52.4		1.04	1	1.2	0.7119	0	0	0		1.5	0.1178	1	1	0
229801_at	C10orf47	254427	chromosome 10 open reading frame 47	178	244	229	215.2	204	214	232	216.6	257	269	250	258.3	315	315	309	312.9		1.01	1	1.2	0.8741	0	0	0		1.5	0.1798	0	0	0
218022_at	VRK3	51231	vaccinia related kinase 3	160	195	185	179.3	166	171	178	171.8	185	185	193	187.7	291	244	249	260.6		-1.04	1	1	0.956	0	0	0		1.5	0.1326	1	1	0
213476_x_at	TUBB3	10381	tubulin, beta 3	1026	1179	1073	1090.6	1108	1048	1132	1095.4	1127	1123	1235	1160.8	1530	1630	1596	1584.7		1	1	1.1	0.9199	0	0	0		1.5	0.0469	1	1	0
215714_s_at	SMARCA4	6597	SWI/SNF related, matrix associated, actin dependent regulator of chromatin, subfamily a, member 4	27	32	35	31.3	37	28	31	31.5	28	41	38	34.8	46	47	43	45.4		1.01	1	1.1	0.9569	0	0	0		1.5	0.133	1	1	0
232079_s_at	PVRL2	5819	poliovirus receptor-related 2 (herpesvirus entry mediator B)	80	101	79	86.3	74	82	98	84	78	90	92	86.7	123	112	143	125.3		-1.03	1	1	0.9974	0	0	0		1.5	0.2125	0	0	0
223984_s_at	NUPL1	9818	nucleoporin like 1	92	83	82	85.9	99	63	88	82	91	107	98	98.7	74	153	171	124.6		-1.05	1	1.1	0.833	0	0	0		1.5	0.6057	0	0	0
208989_s_at	FBXL11	22992	F-box and leucine-rich repeat protein 11	76	97	83	85.3	86	101	94	93.2	83	95	96	91.2	120	127	124	123.8		1.09	1	1.1	0.9542	0	0	0		1.5	0.1116	1	1	0
1556253_s_at			CDNA FLJ37989 fis, clone CTONG2011676	10	11	13	11.3	12	12	11	11.7	12	12	13	12.1	13	16	21	16.4		1.03	1	1.1	0.9536	0	0	0		1.5	0.3398	0	0	0
209210_s_at	PLEKHC1	10979	pleckstrin homology domain containing, family C (with FERM domain) member 1	307	285	299	296.7	262	254	295	269.6	291	284	299	291.4	419	430	443	430.5		-1.1	1	-1	0.9614	0	0	0		1.5	0.0189	1	1	0
224454_at	ETNK1	55500	ethanolamine kinase 1 /// ethanolamine kinase 1	23	25	26	24.8	24	23	26	24.3	22	23	27	24.1	29	41	40	35.9		-1.02	1	-1	0.977	0	0	0		1.5	0.2473	0	0	0
201736_s_at	2008-03-06	10299	membrane-associated ring finger (C3HC4) 6	203	215	221	212.8	206	194	225	207.9	208	209	217	211.4	302	309	315	308.6		-1.02	1	-1	0.9864	0	0	0		1.5	0.0192	1	1	0
220143_x_at	LUC7L	55692	LUC7-like (S. cerevisiae)	102	108	92	100.4	118	95	117	109.5	125	118	110	117.5	155	138	144	145.6		1.09	1	1.2	0.8047	0	0	0		1.5	0.0778	1	1	0
224826_at	KIAA1434	56261	hypothetical protein KIAA1434	335	337	306	325.7	346	331	366	347.4	306	341	311	318.7	423	503	495	472.3		1.07	1	-1	0.9713	0	0	0		1.4	0.09	0	0	0
1552628_a_at	FLJ22313	64224	hypothetical protein FLJ22313	209	222	219	216.3	206	175	201	193.3	181	189	178	182.7	254	336	361	313.6		-1.12	1	-1.2	0.4716	0	0	0		1.4	0.2231	0	0	0
203247_s_at	ZNF24	7572	zinc finger protein 24 (KOX 17)	213	221	226	219.9	235	209	269	236.3	282	309	288	293	304	320	333	318.6		1.07	1	1.3	0.3815	0	0	0		1.4	0.0252	0	0	0
239203_at	FLJ39575	286006	hypothetical protein FLJ39575	21	19	19	19.7	21	15	22	19.5	21	20	22	21	25	35	26	28.5		-1.01	1	1.1	0.9028	0	0	0		1.4	0.247	0	0	0
219516_at	TRPV4	59341	transient receptor potential cation channel, subfamily V, member 4	30	38	31	32.5	35	59	30	39.6	30	30	34	31.1	70	37	40	47		1.22	1	-1	0.9704	0	0	0		1.4	0.5214	0	0	0
41329_at	SCYL3	57147	SCY1-like 3 (S. cerevisiae)	66	68	69	67.9	72	64	78	71	61	69	60	63.5	89	105	101	98.3		1.05	1	-1.1	0.9028	0	0	0		1.4	0.0583	0	0	0
218793_s_at	SCML1	6322	sex comb on midleg-like 1 (Drosophila)	100	109	128	111.6	110	83	117	102.4	110	139	128	124.6	122	175	198	161.6		-1.09	1	1.1	0.9306	0	0	0		1.4	0.3822	0	0	0
208774_at	CSNK1D	1453	casein kinase 1, delta	248	267	263	259.4	242	241	247	243.4	239	241	256	245.1	371	379	377	375.6		-1.07	1	-1.1	0.8721	0	0	0		1.4	0.0129	0	0	0
209051_s_at	RALGDS	5900	ral guanine nucleotide dissociation stimulator	51	49	46	48.9	55	63	41	52.2	51	54	50	51.7	67	80	66	70.8		1.07	1	1.1	0.903	0	0	0		1.4	0.0967	0	0	0
200790_at	ODC1	4953	ornithine decarboxylase 1	1779	1837	1855	1823.5	1715	1821	1847	1793	1793	1849	1866	1835.9	2627	2573	2724	2640.5		-1.02	1	1	0.9774	0	0	0		1.4	0.0116	0	0	0
227222_at	FBXO10	26267	F-box protein 10	60	56	58	57.7	55	69	63	62	60	66	73	66.4	86	90	75	83.6		1.07	1	1.2	0.8287	0	0	0		1.4	0.0761	0	0	0
204154_at	CDO1	1036	cysteine dioxygenase, type I	16	16	16	15.7	18	15	14	15.4	16	15	18	16.6	21	23	25	22.7		-1.02	1	1.1	0.9239	0	0	0		1.4	0.0707	0	0	0
212222_at	PSME4	23198	proteasome (prosome, macropain) activator subunit 4	145	160	151	152	169	116	165	148.1	161	173	156	163.2	204	221	236	220.1		-1.03	1	1.1	0.8883	0	0	0		1.4	0.0597	0	0	0
204605_at	CGRRF1	10668	cell growth regulator with ring finger domain 1	97	106	103	101.8	90	80	117	94.7	94	112	96	100.5	131	146	167	147.4		-1.07	1	-1	0.987	0	0	0		1.4	0.1162	0	0	0
203164_at	SLC33A1	9197	solute carrier family 33 (acetyl-CoA transporter), member 1	88	110	111	102.3	99	85	103	95.5	96	106	107	102.6	136	142	168	148.1		-1.07	1	1	0.9982	0	0	0		1.4	0.1928	0	0	0
206950_at	SCN9A	6335	sodium channel, voltage-gated, type IX, alpha	27	26	22	25.1	30	21	25	25.4	25	25	25	24.7	25	39	49	36.3		1.01	1	-1	0.9805	0	0	0		1.4	0.5102	0	0	0
224311_s_at	CAB39	51719	calcium binding protein 39	50	50	50	50	49	39	51	45.8	49	50	56	51.6	61	74	83	72.3		-1.09	1	1	0.9556	0	0	0		1.4	0.1636	0	0	0
204275_at	SOLH	6650	small optic lobes homolog (Drosophila)	41	51	45	45.4	42	61	57	52.7	48	54	56	52.5	73	56	69	65.5		1.16	1	1.2	0.8702	0	0	0		1.4	0.1949	0	0	0
37117_at	ARHGAP8 /// LOC553158	23779 /// 553158	Rho GTPase activating protein 8 /// PRR5-ARHGAP8 fusion	28	28	25	27.2	28	24	26	26.1	29	30	27	28.7	39	39	40	39.2		-1.04	1	1.1	0.9242	0	0	0		1.4	0.0277	0	0	0
1555270_a_at	WFS1	7466	Wolfram syndrome 1 (wolframin)	52	63	59	57.9	56	71	60	61.8	59	64	80	66.9	87	79	85	83.6		1.07	1	1.2	0.9102	0	0	0		1.4	0.0841	0	0	0
225524_at	ANTXR2	118429	anthrax toxin receptor 2	21	23	27	23.8	25	30	25	26.4	30	28	31	29.6	35	36	33	34.3		1.11	1	1.2	0.8011	0	0	0		1.4	0.1338	0	0	0
1553286_at	ZNF555	148254	zinc finger protein 555	35	36	35	35.2	38	33	31	33.5	34	37	34	35.2	42	53	59	50.9		-1.05	1	1	0.9996	0	0	0		1.4	0.2095	0	0	0
204877_s_at	TAOK2	9344	TAO kinase 2	24	24	26	24.5	25	33	22	26.5	23	25	26	24.7	39	40	28	35.4		1.08	1	1	0.9894	0	0	0		1.4	0.2431	0	0	0
212455_at	YT521	91746	splicing factor YT521-B	374	367	350	363.6	374	337	373	360.9	330	334	315	326.1	473	552	554	524.7		-1.01	1	-1.1	0.6397	0	0	0		1.4	0.0721	0	0	0
244189_at	KIAA1043	23331	KIAA1648 protein	67	59	66	63.8	64	50	64	58.9	59	64	65	62.4	78	96	104	92.1		-1.08	1	-1	0.9763	0	0	0		1.4	0.1739	0	0	0
204828_at	RAD9A	5883	RAD9 homolog A (S. pombe)	60	62	64	61.8	68	70	69	69.1	63	61	66	63.4	77	103	90	89.2		1.12	1	1	0.9587	0	0	0		1.4	0.1543	0	0	0
209536_s_at	EHD4	30844	EH-domain containing 4	102	111	105	106	114	94	98	101.5	108	100	105	104.2	150	153	155	152.9		-1.04	1	-1	0.9703	0	0	0		1.4	0.0197	0	0	0
207708_at	ALOXE3	59344	arachidonate lipoxygenase 3	31	28	30	29.8	35	35	33	34.3	37	34	31	33.9	52	38	40	43		1.15	1	1.1	0.8372	0	0	0		1.4	0.1824	0	0	0
202511_s_at	ATG5	9474	ATG5 autophagy related 5 homolog (S. cerevisiae)	233	251	242	242.1	222	200	257	225.3	221	243	253	238.6	332	350	367	349.1		-1.07	1	-1	0.9805	0	0	0		1.4	0.031	0	0	0
238607_at	ZNF342	162979	zinc finger protein 342	29	36	37	34	35	36	34	35.1	36	38	39	37.6	38	57	54	49.1		1.03	1	1.1	0.9198	0	0	0		1.4	0.35	0	0	0
213131_at	OLFM1	10439	olfactomedin 1	46	50	48	48.1	47	44	61	50.2	42	53	51	48.3	62	71	75	69.4		1.04	1	1	0.9982	0	0	0		1.4	0.0862	0	0	0
219542_at	NEK11	79858	NIMA (never in mitosis gene a)- related kinase 11	39	42	48	42.6	49	58	42	49.2	48	46	50	48.2	64	60	61	61.5		1.15	1	1.1	0.8796	0	0	0		1.4	0.0966	0	0	0
1555337_a_at	ZNF317	57693	zinc finger protein 317	32	37	33	34.1	42	31	42	37.9	36	39	41	38.7	45	47	56	49.2		1.11	1	1.1	0.8469	0	0	0		1.4	0.1352	0	0	0
1557067_s_at	LUC7L	55692	LUC7-like (S. cerevisiae)	86	101	88	91.4	86	89	82	85.8	90	94	98	94	105	149	147	131.8		-1.07	1	1	0.9703	0	0	0		1.4	0.2816	0	0	0
205277_at	PRDM2	7799	PR domain containing 2, with ZNF domain	27	33	29	29.7	31	28	31	30.1	32	33	27	30.6	46	39	44	42.8		1.01	1	1	0.9799	0	0	0		1.4	0.1337	0	0	0
225442_at	DDR2	4921	Discoidin domain receptor family, member 2	22	25	18	21.3	23	19	22	21.4	22	21	22	22	33	28	32	30.7		1	1	1	0.9825	0	0	0		1.4	0.2471	0	0	0
212478_at	FLJ13910	64795	hypothetical protein FLJ13910	36	38	35	36.5	30	34	33	32.4	34	35	31	33.3	54	56	48	52.5		-1.13	1	-1.1	0.8662	0	0	0		1.4	0.0704	0	0	0
202498_s_at	SLC2A3	6515	solute carrier family 2 (facilitated glucose transporter), member 3	88	70	80	79	89	82	83	84.3	99	118	95	103.6	89	122	134	113.8		1.07	1	1.3	0.7847	0	0	0		1.4	0.3306	0	0	0
236831_at	C3orf6	152137	chromosome 3 open reading frame 6	29	31	36	31.7	37	23	38	31.9	37	42	37	38.7	30	56	57	45.6		1.01	1	1.2	0.8127	0	0	0		1.4	0.5468	0	0	0
207181_s_at	CASP7	840	caspase 7, apoptosis-related cysteine peptidase	134	134	142	136.6	120	127	129	125.1	151	175	158	161.1	170	201	223	196.7		-1.09	1	1.2	0.7099	0	0	0		1.4	0.1429	0	0	0
204233_s_at	CHKA	1119	choline kinase alpha	86	88	92	88.7	81	67	88	78.3	89	89	93	90.2	130	130	124	127.7		-1.13	1	1	0.9614	0	0	0		1.4	0.0171	0	0	0
218797_s_at	SIRT7	51547	sirtuin (silent mating type information regulation 2 homolog) 7 (S. cerevisiae)	130	134	134	132.7	145	150	142	145.6	134	136	143	137.6	180	188	206	191		1.1	1	1	0.8914	0	0	0		1.4	0.0398	0	0	0
224707_at	ORF1-FL49	84418	putative nuclear protein ORF1-FL49	744	765	809	772.1	760	778	798	778.8	747	783	786	771.8	1058	1150	1129	1111.4		1.01	1	-1	0.9993	0	0	0		1.4	0.0308	0	0	0
228382_at	LOC90268	90268	hypothetical protein BC007706	39	42	40	40.4	40	38	35	37.9	41	46	43	43.4	54	66	55	58.2		-1.07	1	1.1	0.8554	0	0	0		1.4	0.0948	0	0	0
218177_at	CHMP1B	57132	chromatin modifying protein 1B	73	70	70	71.1	71	57	61	62.7	67	78	67	70.6	99	99	109	102.3		-1.13	1	-1	0.9921	0	0	0		1.4	0.0329	0	0	0
1552618_at	STX6	10228	syntaxin 6	61	81	70	70.2	73	66	78	72	69	73	71	70.9	88	105	111	101		1.03	1	1	0.9924	0	0	0		1.4	0.2209	0	0	0
1570253_a_at	RHEBL1	121268	Ras homolog enriched in brain like 1	22	23	22	22.5	22	20	21	20.9	20	21	20	20.4	25	36	37	32.4		-1.08	1	-1.1	0.5392	0	0	0		1.4	0.2837	0	0	0
223129_x_at	MYLIP	29116	myosin regulatory light chain interacting protein	89	98	98	95	90	78	95	87.4	91	92	87	89.8	144	133	134	136.7		-1.09	1	-1.1	0.8926	0	0	0		1.4	0.0395	0	0	0
208436_s_at	IRF7	3665	interferon regulatory factor 7	50	42	44	45.1	41	50	44	44.5	36	44	44	41.2	67	64	64	64.9		-1.01	1	-1.1	0.9379	0	0	0		1.4	0.0837	0	0	0
1552496_a_at	COBL	23242	cordon-bleu homolog (mouse)	22	27	27	25.3	25	25	28	26	23	23	21	22.3	32	41	37	36.3		1.03	1	-1.1	0.8721	0	0	0		1.4	0.1899	0	0	0
226778_at	INM01	157695	Chromosome 8 open reading frame 42	62	77	68	68.7	69	71	78	72.5	78	78	71	75.6	84	105	110	98.8		1.06	1	1.1	0.904	0	0	0		1.4	0.214	0	0	0
204715_at	PANX1	24145	pannexin 1	28	30	29	28.7	26	26	27	26.2	23	28	34	28.2	28	49	53	41.3		-1.1	1	-1	0.989	0	0	0		1.4	0.5032	0	0	0
201821_s_at	TIMM17A	10440	translocase of inner mitochondrial membrane 17 homolog A (yeast)	391	355	400	381.1	412	341	383	377.4	375	391	376	380.4	478	593	580	548		-1.01	1	-1	0.9969	0	0	0		1.4	0.1302	0	0	0
223465_at	COL4A3BP	10087	collagen, type IV, alpha 3 (Goodpasture antigen) binding protein	60	64	70	64.6	59	40	72	55.2	52	69	58	59.2	66	105	115	92.8		-1.17	1	-1.1	0.9477	0	0	0		1.4	0.4436	0	0	0
218902_at	NOTCH1	4851	Notch homolog 1, translocation-associated (Drosophila)	52	68	57	58.7	58	52	54	54.7	64	65	63	63.9	70	89	95	84.4		-1.07	1	1.1	0.9299	0	0	0		1.4	0.2659	0	0	0
214755_at	UAP1L1	91373	UDP-N-acteylglucosamine pyrophosphorylase 1-like 1	20	22	25	22.5	21	24	27	24	25	24	22	23.3	28	33	37	32.3		1.07	1	1	0.9708	0	0	0		1.4	0.2094	0	0	0
208789_at	PTRF	284119	polymerase I and transcript release factor	356	378	354	362.4	319	332	352	334.3	399	364	418	393	512	533	518	521		-1.08	1	1.1	0.8796	0	0	0		1.4	0.0159	0	0	0
217965_s_at	HCNGP	29115	transcriptional regulator protein	169	200	186	184.5	182	171	195	182.2	163	176	197	178.4	222	285	295	265.2		-1.01	1	-1	0.9731	0	0	0		1.4	0.2085	0	0	0
218068_s_at	ZNF672	79894	zinc finger protein 672	96	93	107	98.5	97	92	105	98	113	120	122	118.1	125	149	152	141.6		-1.01	1	1.2	0.6861	0	0	0		1.4	0.1249	0	0	0
229033_s_at	MUM1	84939	melanoma associated antigen (mutated) 1	91	86	94	90.3	78	77	99	84.2	106	111	109	108.4	139	118	133	129.8		-1.07	1	1.2	0.4872	0	0	0		1.4	0.0715	0	0	0
204178_s_at	RBM14	10432	RNA binding motif protein 14	117	152	151	138.8	122	119	150	129.5	134	139	144	138.8	206	184	210	199.5		-1.07	1	-1	1	0	0	0		1.4	0.1823	0	0	0
229000_at	ZNF77	58492	zinc finger protein 77 (pT1)	44	47	45	45.1	45	43	47	45	35	48	48	43.3	47	70	82	64.7		-1	1	-1	0.9774	0	0	0		1.4	0.4036	0	0	0
205822_s_at	HMGCS1	3157	3-hydroxy-3-methylglutaryl-Coenzyme A synthase 1 (soluble)	45	39	42	41.8	43	35	41	39.7	44	39	45	42.6	49	71	63	60		-1.05	1	1	0.9802	0	0	0		1.4	0.2617	0	0	0
216894_x_at	CDKN1C	1028	cyclin-dependent kinase inhibitor 1C (p57, Kip2)	22	20	19	20.4	22	32	23	25.4	19	19	23	19.9	41	25	25	29.3		1.24	1	-1	0.9807	0	0	0		1.4	0.4164	0	0	0
223000_s_at	F11R	50848	F11 receptor	499	506	520	508.4	500	467	533	499.1	434	460	460	450.9	734	725	730	730		-1.02	1	-1.1	0.5378	0	0	0		1.4	0.0042	0	0	0
222459_at	C1orf108	79647	chromosome 1 open reading frame 108	119	126	134	126.1	138	102	114	117.3	99	146	139	125.7	124	220	217	181		-1.07	1	-1	0.9989	0	0	0		1.4	0.4744	0	0	0
226393_at	CYP2U1	113612	cytochrome P450, family 2, subfamily U, polypeptide 1	37	48	41	41.9	47	28	33	35.4	32	40	33	35	50	63	68	60		-1.18	1	-1.2	0.8772	0	0	0		1.4	0.2573	0	0	0
221002_s_at	TSPAN14	81619	tetraspanin 14 /// tetraspanin 14	226	244	251	240.1	217	258	249	240.6	239	232	257	242.8	352	336	345	344.3		1	1	1	0.9851	0	0	0		1.4	0.0288	0	0	0
228582_x_at	MALAT1	378938	Metastasis associated lung adenocarcinoma transcript 1 (non-coding RNA)	73	52	58	60.6	54	30	62	46.4	76	69	61	68.2	66	93	106	86.8		-1.3	1	1.1	0.9368	0	0	0		1.4	0.4268	0	0	0
208361_s_at	POLR3D	661	polymerase (RNA) III (DNA directed) polypeptide D, 44kDa	62	76	77	71.2	82	60	73	71.2	64	65	70	66.1	88	103	117	102		-1	1	-1.1	0.9418	0	0	0		1.4	0.2365	0	0	0
217127_at	CTH	1491	cystathionase (cystathionine gamma-lyase)	44	39	43	42.2	53	38	44	44.4	40	46	43	42.8	45	77	64	60.5		1.05	1	1	0.9842	0	0	0		1.4	0.3906	0	0	0
242819_at				20	17	16	17.6	18	15	17	16.6	18	21	18	19.2	22	25	29	25.2		-1.06	1	1.1	0.9195	0	0	0		1.4	0.2039	0	0	0
209324_s_at	RGS16	6004	regulator of G-protein signalling 16	32	33	31	31.9	25	37	26	28.9	33	25	31	29.6	72	34	40	45.7		-1.1	1	-1.1	0.9451	0	0	0		1.4	0.5618	0	0	0
225268_at	KPNA4	3840	karyopherin alpha 4 (importin alpha 3)	647	664	652	654.2	629	576	619	607.7	624	633	630	629	871	980	965	937.2		-1.08	1	-1	0.5916	0	0	0		1.4	0.0362	0	0	0
230017_at			Transcribed locus	38	27	35	32.9	37	32	30	32.8	35	37	38	36.9	48	46	48	47.2		-1.01	1	1.1	0.9361	0	0	0		1.4	0.2302	0	0	0
222475_at	HCNGP	29115	transcriptional regulator protein	79	77	75	76.8	76	84	84	81.2	79	78	77	78	111	105	115	110.1		1.06	1	1	0.9394	0	0	0		1.4	0.0224	0	0	0
206587_at	CCT6B	10693	chaperonin containing TCP1, subunit 6B (zeta 2)	35	34	30	32.6	36	27	34	32.1	35	36	36	35.7	41	51	49	46.7		-1.02	1	1.1	0.8751	0	0	0		1.4	0.1492	0	0	0
224097_s_at	F11R	50848	F11 receptor	85	96	83	87.8	89	100	83	90.4	80	82	90	83.9	135	121	121	125.8		1.03	1	-1	0.9556	0	0	0		1.4	0.0821	0	0	0
227017_at	ERICH1	157697	glutamate-rich 1	135	134	135	134.8	138	111	136	128	136	131	146	137.5	163	209	210	193		-1.05	1	1	0.9617	0	0	0		1.4	0.1497	0	0	0
234989_at	TncRNA	283131	trophoblast-derived noncoding RNA	154	135	182	155.8	176	142	154	156.8	173	182	170	175	192	202	286	223		1.01	1	1.1	0.9116	0	0	0		1.4	0.3703	0	0	0
212238_at	ASXL1	171023	additional sex combs like 1 (Drosophila)	86	86	94	88.9	90	85	92	88.8	89	85	94	89	114	131	137	127.2		-1	1	1	0.9968	0	0	0		1.4	0.0929	0	0	0
203947_at	CSTF3	1479	cleavage stimulation factor, 3' pre-RNA, subunit 3, 77kDa	267	263	265	265	254	261	270	261.8	236	248	242	241.8	382	372	384	379.3		-1.01	1	-1.1	0.4611	0	0	0		1.4	0.0032	0	0	0
221992_at			MRNA; cDNA DKFZp686B0962 (from clone DKFZp686B0962)	51	53	58	54.3	64	59	53	58.8	60	49	56	55.1	97	81	60	77.6		1.08	1	1	0.9869	0	0	0		1.4	0.358	0	0	0
226201_at	DOT1L	84444	DOT1-like, histone H3 methyltransferase (S. cerevisiae)	38	35	30	34.2	36	32	30	32.8	44	36	36	38.6	51	48	47	49		-1.04	1	1.1	0.9179	0	0	0		1.4	0.1342	0	0	0
218066_at	SLC12A7	10723	solute carrier family 12 (potassium/chloride transporters), member 7	195	224	202	206.3	222	206	196	207.9	233	202	230	221.3	314	306	268	295		1.01	1	1.1	0.9261	0	0	0		1.4	0.0966	0	0	0
228229_at	ZNF526	116115	zinc finger protein 526	61	71	72	68	76	75	77	75.8	68	77	76	73.8	87	100	105	97.2		1.12	1	1.1	0.9233	0	0	0		1.4	0.1417	0	0	0
209293_x_at	ID4	3400	inhibitor of DNA binding 4, dominant negative helix-loop-helix protein	48	60	57	54.7	64	89	69	73.2	66	65	56	62.4	73	78	84	78.1		1.34	1	1.1	0.8926	0	0	0		1.4	0.1278	0	0	0
217858_s_at	ARMCX3	51566	armadillo repeat containing, X-linked 3	149	186	195	175.3	187	159	198	180.8	157	185	181	173.8	203	265	293	250.6		1.03	1	-1	0.9935	0	0	0		1.4	0.3303	0	0	0
201379_s_at	TPD52L2	7165	tumor protein D52-like 2	187	221	206	204.2	204	204	218	208.6	222	237	255	237.7	280	291	306	291.8		1.02	1	1.2	0.8321	0	0	0		1.4	0.0763	0	0	0
206273_at	C18orf43	10650	chromosome 18 open reading frame 43	17	27	27	23.2	21	31	24	24.9	24	25	30	26.1	30	35	35	33.1		1.07	1	1.1	0.9597	0	0	0		1.4	0.3859	0	0	0
231084_at	C10orf79	80217	chromosome 10 open reading frame 79	18	16	12	15	15	16	14	14.9	15	15	16	15.2	19	23	22	21.5		-1.01	1	1	0.9927	0	0	0		1.4	0.2648	0	0	0
223945_x_at	LOC441212	441212	PNAS-13	77	84	84	81.6	84	96	81	86.5	88	82	81	83.8	123	107	120	116.5		1.06	1	1	0.9607	0	0	0		1.4	0.0712	0	0	0
212662_at	PVR	5817	poliovirus receptor	115	139	128	127	132	112	140	127.4	133	141	149	140.8	160	194	193	181.4		1	1	1.1	0.8926	0	0	0		1.4	0.1541	0	0	0
1554901_at			FGF2-associated protein GAFA1 (GAFA1)	14	14	15	14	15	15	14	14.6	16	13	14	14.3	16	24	20	20		1.04	1	1	0.9838	0	0	0		1.4	0.2806	0	0	0
226378_s_at	C19orf25	148223	chromosome 19 open reading frame 25	37	40	39	38.5	41	44	44	42.8	40	43	40	40.8	55	53	58	54.9		1.11	1	1.1	0.8926	0	0	0		1.4	0.0362	0	0	0
201620_at	MBTPS1	8720	membrane-bound transcription factor peptidase, site 1	204	229	217	216.4	238	224	229	230.2	232	214	247	230.6	304	312	311	308.9		1.06	1	1.1	0.9215	0	0	0		1.4	0.0314	0	0	0
204139_x_at	ZNF42	7593	zinc finger protein 42 (myeloid-specific retinoic acid-responsive)	84	89	86	86.2	94	97	82	90.7	88	78	83	82.6	135	103	134	123		1.05	1	-1	0.9288	0	0	0		1.4	0.1758	0	0	0
238528_at	UBR1	197131	Ubiquitin protein ligase E3 component n-recognin 1	27	30	33	29.8	24	39	31	30.7	29	28	22	25.9	38	44	46	42.5		1.03	1	-1.2	0.9171	0	0	0		1.4	0.1454	0	0	0
229344_x_at	FAM80B	57494	family with sequence similarity 80, member B	47	55	57	52.9	54	47	57	52.8	54	58	52	54.3	69	74	85	75.5		-1	1	1	0.9774	0	0	0		1.4	0.1563	0	0	0
205483_s_at	G1P2	9636	interferon, alpha-inducible protein (clone IFI-15K)	62	60	63	61.4	60	46	55	53.7	58	62	48	55.6	91	81	92	87.6		-1.14	1	-1.1	0.9138	0	0	0		1.4	0.0489	0	0	0
223602_at	USP30	84749	ubiquitin specific peptidase 30	61	72	74	68.7	72	49	73	63.4	58	79	72	68.9	93	97	104	97.9		-1.08	1	1	0.9982	0	0	0		1.4	0.1042	0	0	0
208066_s_at	GTF2B	2959	general transcription factor IIB /// general transcription factor IIB	156	160	159	158.3	146	140	170	151.4	169	171	163	167.5	213	231	233	225.6		-1.05	1	1.1	0.7191	0	0	0		1.4	0.0241	0	0	0
205992_s_at	IL15	3600	interleukin 15	163	188	179	176.2	208	134	200	177	173	182	206	186.7	238	260	256	251.1		1	1	1.1	0.9494	0	0	0		1.4	0.064	0	0	0
204436_at	pp9099	80301	PH domain-containing protein	82	79	77	79.3	71	76	70	72.2	77	80	76	77.8	102	119	119	113		-1.1	1	-1	0.9542	0	0	0		1.4	0.0711	0	0	0
1555384_a_at	LARP4	113251	La ribonucleoprotein domain family, member 4	73	79	66	72.6	80	70	85	78	74	85	74	77.2	88	114	111	103.4		1.07	1	1.1	0.9484	0	0	0		1.4	0.1987	0	0	0
223130_s_at	MYLIP	29116	myosin regulatory light chain interacting protein	89	81	96	88.8	86	73	88	82.3	70	82	76	75.7	105	143	135	126.5		-1.08	1	-1.2	0.8287	0	0	0		1.4	0.2307	0	0	0
229630_s_at	WTAP	9589	Wilms tumor 1 associated protein	352	286	319	317.6	318	300	330	315.7	328	355	288	322.3	458	449	451	452.4		-1.01	1	1	0.9897	0	0	0		1.4	0.0894	0	0	0
208791_at	CLU	1191	clusterin (complement lysis inhibitor, SP-40,40, sulfated glycoprotein 2, testosterone-repressed prostate message 2, apolipoprotein J)	663	736	644	679.7	658	631	708	664.9	690	665	705	686.6	915	946	1049	968.2		-1.02	1	1	0.9864	0	0	0		1.4	0.0827	0	0	0
209162_s_at	PRPF4	9128	PRP4 pre-mRNA processing factor 4 homolog (yeast)	225	257	238	239.5	222	232	239	231	273	226	236	244.1	338	326	360	341.1		-1.04	1	1	0.9838	0	0	0		1.4	0.0585	0	0	0
228003_at	RAB30	27314	RAB30, member RAS oncogene family	33	30	31	31.6	30	31	33	31.3	34	34	36	34.8	45	51	39	45		-1.01	1	1.1	0.7868	0	0	0		1.4	0.1448	0	0	0
212781_at	RBBP6	5930	retinoblastoma binding protein 6	176	170	166	170.5	163	122	170	150.1	171	178	181	176.6	195	265	277	242.8		-1.14	1	1	0.8958	0	0	0		1.4	0.2488	0	0	0
65588_at	LOC388796	388796	hypothetical LOC388796	334	378	347	352.5	348	326	363	345.4	355	377	366	365.9	509	481	516	501.9		-1.02	1	1	0.9451	0	0	0		1.4	0.0464	0	0	0
209037_s_at	EHD1	10938	EH-domain containing 1	49	51	52	50.7	53	45	53	49.9	50	50	53	51	62	68	89	72.1		-1.02	1	1	0.988	0	0	0		1.4	0.2406	0	0	0
225970_at	DDHD1	80821	DDHD domain containing 1	59	63	60	60.8	59	34	62	49.9	61	69	77	68.8	58	107	104	86.5		-1.22	1	1.1	0.8883	0	0	0		1.4	0.5049	0	0	0
218205_s_at	MKNK2	2872	MAP kinase interacting serine/threonine kinase 2	721	800	837	784.4	858	847	881	861.8	690	781	794	753.4	1026	1191	1137	1115.9		1.1	1	-1	0.9631	0	0	0		1.4	0.0945	0	0	0
211037_s_at	LENG4	79143	leukocyte receptor cluster (LRC) member 4 /// leukocyte receptor cluster (LRC) member 4	53	51	57	53.4	52	99	54	65.3	49	50	61	52.9	93	67	70	75.9		1.22	1	-1	0.9927	0	0	0		1.4	0.24	0	0	0
213560_at	GADD45B	4616	Growth arrest and DNA-damage-inducible, beta	43	42	40	41.6	32	46	39	38.7	40	36	37	37.6	54	87	44	59.2		-1.08	1	-1.1	0.8287	0	0	0		1.4	0.5156	0	0	0
244563_at	FLJ21924	79832	hypothetical protein FLJ21924	80	79	77	78.7	78	48	65	62.7	80	74	75	76.3	102	114	120	111.9		-1.25	1	-1	0.9245	0	0	0		1.4	0.0614	0	0	0
222513_s_at	SORBS1	10580	sorbin and SH3 domain containing 1	43	46	42	43.6	36	45	38	39.5	56	45	43	47.3	68	60	59	62		-1.1	1	1.1	0.9451	0	0	0		1.4	0.0705	0	0	0
222585_x_at	LOC51315	51315	hypothetical protein LOC51315	114	127	136	125	129	110	138	125.2	154	146	164	154.2	158	180	197	177.6		1	1	1.2	0.7239	0	0	0		1.4	0.1514	0	0	0
205168_at	DDR2	4921	discoidin domain receptor family, member 2	27	28	28	27.7	31	45	31	35.1	33	28	26	28.7	39	39	40	39.4		1.26	1	1	0.9749	0	0	0		1.4	0.0088	0	0	0
222235_s_at	GALNACT-2	55454	chondroitin sulfate GalNAcT-2	69	66	67	67.5	65	41	60	54	62	78	68	69.1	75	108	108	95.8		-1.25	1	1	0.98	0	0	0		1.4	0.2862	0	0	0
1552977_a_at	TNRC5	10695	trinucleotide repeat containing 5	56	74	62	63.4	64	68	73	68	69	64	70	67.4	92	93	85	90		1.07	1	1.1	0.9603	0	0	0		1.4	0.1637	0	0	0
218926_at	MYNN	55892	myoneurin	67	76	75	72.9	76	69	79	74.6	91	89	83	87.4	91	114	107	103.5		1.02	1	1.2	0.6887	0	0	0		1.4	0.1403	0	0	0
225468_at	FLJ36874	219988	hypothetical protein FLJ36874	98	114	102	104.2	89	76	107	89.8	89	87	94	89.9	131	157	157	147.9		-1.16	1	-1.2	0.791	0	0	0		1.4	0.1329	0	0	0
244246_at	MIPOL1	145282	mirror-image polydactyly 1	36	37	37	36.6	37	26	43	34.5	29	37	40	34.9	32	63	69	52		-1.06	1	-1	0.9708	0	0	0		1.4	0.5939	0	0	0
240747_at				14	14	13	13.6	13	15	14	14	15	15	16	15.1	17	18	24	19.3		1.03	1	1.1	0.7837	0	0	0		1.4	0.2893	0	0	0
201770_at	SNRPA	6626	small nuclear ribonucleoprotein polypeptide A	335	378	372	361.2	355	354	389	365.6	369	379	384	377.1	517	510	511	512.6		1.01	1	1	0.9322	0	0	0		1.4	0.0392	0	0	0
201582_at	SEC23B	10483	Sec23 homolog B (S. cerevisiae)	127	149	157	144	143	133	145	140.3	155	164	153	157.4	176	224	216	204.3		-1.03	1	1.1	0.9082	0	0	0		1.4	0.2021	0	0	0
204068_at	STK3	6788	serine/threonine kinase 3 (STE20 homolog, yeast)	196	182	172	182.8	189	139	190	170.9	148	173	179	165.7	224	275	284	259.5		-1.07	1	-1.1	0.904	0	0	0		1.4	0.1569	0	0	0
202618_s_at	MECP2	4204	methyl CpG binding protein 2 (Rett syndrome)	46	48	49	47.9	51	44	46	46.6	45	48	49	47.5	70	66	68	67.9		-1.03	1	-1	0.9842	0	0	0		1.4	0.0175	0	0	0
33323_r_at	SFN	2810	stratifin	910	1092	1093	1027.8	836	894	958	894.4	809	815	843	822.4	1606	1347	1434	1458.5		-1.15	1	-1.2	0.7059	0	0	0		1.4	0.1444	0	0	0
229101_at	LOC150166	150166	Hypothetical protein LOC150166	40	45	40	41.6	45	36	46	42	40	44	47	43.5	54	60	64	59.1		1.01	1	1	0.9614	0	0	0		1.4	0.0942	0	0	0
202890_at	MAP7	9053	microtubule-associated protein 7	469	452	496	472.1	478	445	498	473	454	518	486	485.7	605	697	713	669.8		1	1	1	0.9657	0	0	0		1.4	0.0855	0	0	0
40524_at	PTPN21	11099	protein tyrosine phosphatase, non-receptor type 21	22	22	21	21.5	22	20	23	21.7	24	21	22	22.2	30	31	30	30.4		1.01	1	1	0.9438	0	0	0		1.4	0.0088	0	0	0
1559382_at	MGC2747	79086	Hypothetical protein MGC2747	33	31	33	32	31	30	31	30.5	32	37	31	33.2	44	41	52	45.4		-1.05	1	1	0.9631	0	0	0		1.4	0.1302	0	0	0
221419_s_at				260	165	166	192.3	400	252	207	275.3	308	205	202	233.5	263	267	288	272.6		1.43	1	1.2	0.9427	0	0	0		1.4	0.3891	0	0	0
221897_at	TRIM52	84851	tripartite motif-containing 52	40	41	42	41.1	41	29	45	37.7	48	53	48	49.5	45	67	66	58.2		-1.09	1	1.2	0.5724	0	0	0		1.4	0.3326	0	0	0
205479_s_at	PLAU	5328	plasminogen activator, urokinase	119	131	134	127.6	138	122	149	136	105	114	138	118.1	180	181	181	180.9		1.07	1	-1.1	0.9502	0	0	0		1.4	0.0381	0	0	0
1552931_a_at	PDE8A	5151	phosphodiesterase 8A	175	191	186	184	183	171	192	181.6	178	177	203	185.3	255	253	275	260.7		-1.01	1	1	0.9916	0	0	0		1.4	0.038	0	0	0
206036_s_at	REL	5966	v-rel reticuloendotheliosis viral oncogene homolog (avian)	45	41	42	42.4	43	32	40	38.1	44	43	42	43.1	42	65	80	60.2		-1.11	1	1	0.9703	0	0	0		1.4	0.4903	0	0	0
221528_s_at	ELMO2	63916	engulfment and cell motility 2 (ced-12 homolog, C. elegans)	94	115	106	104.4	104	97	121	106.6	101	104	104	103.2	134	157	154	148		1.02	1	-1	0.9878	0	0	0		1.4	0.1338	0	0	0
203579_s_at	SLC7A6	9057	solute carrier family 7 (cationic amino acid transporter, y+ system), member 6	33	40	33	35.2	37	38	37	37.2	39	39	39	38.7	47	51	51	49.8		1.06	1	1.1	0.904	0	0	0		1.4	0.1237	0	0	0
226606_s_at	GTPBP5	26164	GTP binding protein 5 (putative)	35	40	40	38.6	34	47	40	39.6	35	39	39	37.8	50	55	60	54.6		1.03	1	-1	0.9779	0	0	0		1.4	0.1152	0	0	0
218433_at	PANK3	79646	pantothenate kinase 3	67	63	63	64.3	52	55	66	57.1	64	68	61	64.4	81	94	99	91		-1.13	1	1	0.9953	0	0	0		1.4	0.0979	0	0	0
209422_at	PHF20	51230	PHD finger protein 20	198	207	187	197.1	175	155	188	172.2	174	232	216	205.9	214	315	321	278.9		-1.14	1	1	0.9726	0	0	0		1.4	0.3346	0	0	0
223221_at	SCO1	6341	SCO cytochrome oxidase deficient homolog 1 (yeast)	264	303	296	286.9	279	270	301	283.1	253	284	282	272.5	383	409	427	406		-1.01	1	-1.1	0.9451	0	0	0		1.4	0.0739	0	0	0
222804_x_at	WDR32	79269	WD repeat domain 32	127	121	126	124.6	128	101	125	117.2	115	126	125	122	162	177	191	176.3		-1.06	1	-1	0.9631	0	0	0		1.4	0.0689	0	0	0
1556221_a_at			CDNA FLJ35137 fis, clone PLACE6009419	20	20	19	19.9	20	20	20	19.8	20	21	21	20.9	30	24	30	28.2		-1.01	1	1	0.9035	0	0	0		1.4	0.1353	0	0	0
203992_s_at	UTX	7403	ubiquitously transcribed tetratricopeptide repeat, X chromosome	74	82	87	81	88	63	88	78.6	80	92	79	83.6	98	124	124	114.6		-1.03	1	1	0.9731	0	0	0		1.4	0.1869	0	0	0
223070_at	SELK	58515	selenoprotein K	278	355	335	320.7	307	302	327	312	332	327	339	332.8	433	464	464	453.6		-1.03	1	1	0.9703	0	0	0		1.4	0.1383	0	0	0
212809_at	NFATC2IP	84901	nuclear factor of activated T-cells, cytoplasmic, calcineurin-dependent 2 interacting protein	105	111	109	108.4	112	89	106	101.7	98	98	96	97.3	134	163	165	153.4		-1.07	1	-1.1	0.496	0	0	0		1.4	0.1151	0	0	0
226933_s_at	ID4	3400	Inhibitor of DNA binding 4, dominant negative helix-loop-helix protein	37	28	29	31.1	38	22	29	29.1	31	33	38	34	33	54	48	43.9		-1.07	1	1.1	0.9505	0	0	0		1.4	0.4487	0	0	0
229650_s_at	MGC2747	79086	hypothetical protein MGC2747	97	124	110	109.9	103	99	115	105.6	114	124	109	115.6	148	159	159	155.4		-1.04	1	1.1	0.9626	0	0	0		1.4	0.1277	0	0	0
222011_s_at	TCP1	6950	t-complex 1	253	248	244	248.4	246	211	262	238.4	245	277	265	262	322	358	376	351.2		-1.04	1	1.1	0.904	0	0	0		1.4	0.0597	0	0	0
204005_s_at	PAWR	5074	PRKC, apoptosis, WT1, regulator	99	99	91	96.5	98	90	103	96.6	82	101	99	93.4	118	139	155	136.4		1	1	-1	0.9747	0	0	0		1.4	0.1623	0	0	0
228388_at	NFKBIB	4793	nuclear factor of kappa light polypeptide gene enhancer in B-cells inhibitor, beta	36	43	46	41.2	43	50	38	43.5	40	40	38	39.4	59	50	66	58.2		1.06	1	-1	0.9675	0	0	0		1.4	0.2461	0	0	0
202980_s_at	SIAH1	6477	seven in absentia homolog 1 (Drosophila)	57	63	57	58.8	52	46	59	52.4	52	63	56	57	71	92	88	83.1		-1.12	1	-1	0.9728	0	0	0		1.4	0.1583	0	0	0
218686_s_at	RHBDF1	64285	rhomboid family 1 (Drosophila)	59	71	67	65.3	68	59	70	65.8	62	69	61	63.7	87	84	108	92.3		1.01	1	-1	0.978	0	0	0		1.4	0.2009	0	0	0
219357_at	GTPBP1	9567	GTP binding protein 1	61	68	69	66.2	71	53	67	63.3	67	68	63	66.1	82	103	98	93.6		-1.05	1	-1	0.9975	0	0	0		1.4	0.1448	0	0	0
214552_s_at	RABEP1	9135	rabaptin, RAB GTPase binding effector protein 1	46	52	47	48.4	39	67	50	50.9	47	57	49	50.7	63	67	75	68.3		1.05	1	1	0.9618	0	0	0		1.4	0.1066	0	0	0
222343_at	BCL2L11	10018	BCL2-like 11 (apoptosis facilitator)	17	17	16	16.7	19	14	19	17.4	15	15	16	15.4	22	23	26	23.6		1.04	1	-1.1	0.8396	0	0	0		1.4	0.071	0	0	0
204453_at	ZNF84	7637	zinc finger protein 84 (HPF2)	111	109	103	107.5	100	109	121	109.9	123	134	129	128.8	136	161	160	151.8		1.02	1	1.2	0.5352	0	0	0		1.4	0.0894	0	0	0
233899_x_at	ZBTB10	65986	Zinc finger and BTB domain containing 10	39	39	45	41.1	43	26	42	35.9	35	48	45	42.2	41	72	67	58.1		-1.15	1	1	0.9859	0	0	0		1.4	0.4821	0	0	0
225808_at	LOC124512	124512	Hypothetical protein LOC124512	613	686	685	660.6	655	647	698	666.2	717	705	715	712.3	900	950	949	932.6		1.01	1	1.1	0.8636	0	0	0		1.4	0.0474	0	0	0
220444_at	ZNF557	79230	zinc finger protein 557	24	27	26	25.6	31	19	29	25.9	27	27	27	26.8	32	37	39	36.1		1.01	1	1	0.904	0	0	0		1.4	0.1142	0	0	0
222199_s_at	BIN3	55909	bridging integrator 3	111	134	138	126.9	120	159	146	140.7	137	140	137	138	155	188	197	179.2		1.11	1	1.1	0.919	0	0	0		1.4	0.2153	0	0	0
221035_s_at	TEX14	56155	testis expressed sequence 14 /// testis expressed sequence 14	18	18	16	17.3	17	19	17	17.5	21	18	16	18	24	24	25	24.4		1.02	1	1	0.9752	0	0	0		1.4	0.0298	0	0	0
241716_at	HSPD1	3329	heat shock 60kDa protein 1 (chaperonin)	54	60	59	57.5	48	35	58	45.8	54	67	59	59.7	70	84	91	81.2		-1.26	1	1	0.9687	0	0	0		1.4	0.1601	0	0	0
224206_x_at	MYNN	55892	myoneurin	75	91	94	86.3	94	77	79	83.1	101	108	111	106.7	101	141	127	121.7		-1.04	1	1.2	0.791	0	0	0		1.4	0.2955	0	0	0
214212_x_at	PLEKHC1	10979	pleckstrin homology domain containing, family C (with FERM domain) member 1	91	112	102	101.2	98	102	112	103.8	93	96	91	93.6	151	134	144	142.8		1.03	1	-1.1	0.9179	0	0	0		1.4	0.1222	0	0	0
229074_at	EHD4	30844	EH-domain containing 4	50	53	47	50.1	49	31	45	40.8	40	58	45	47.2	64	69	81	70.7		-1.23	1	-1.1	0.9687	0	0	0		1.4	0.1392	0	0	0
1558256_at	LOC148189	148189	hypothetical protein LOC148189	26	24	23	24.1	26	18	25	22.7	26	26	27	26.4	26	36	42	33.9		-1.06	1	1.1	0.8577	0	0	0		1.4	0.3983	0	0	0
209340_at	UAP1	6675	UDP-N-acteylglucosamine pyrophosphorylase 1	199	239	225	220.4	193	185	219	198.2	197	231	205	210.5	286	329	320	310.8		-1.11	1	-1	0.9631	0	0	0		1.4	0.1155	0	0	0
205266_at	LIF	3976	leukemia inhibitory factor (cholinergic differentiation factor)	76	101	96	90.1	85	86	96	89.1	96	97	100	97.4	131	126	124	127		-1.01	1	1.1	0.9494	0	0	0		1.4	0.186	0	0	0
203135_at	TBP	6908	TATA box binding protein	106	120	120	115.3	100	116	109	108	123	116	124	120.9	184	143	163	162.5		-1.07	1	1	0.9361	0	0	0		1.4	0.1646	0	0	0
240405_at	CASQ1	844	Calsequestrin 1 (fast-twitch, skeletal muscle)	17	22	18	18.6	21	17	16	17.8	21	20	20	20.2	22	26	32	26.2		-1.05	1	1.1	0.9361	0	0	0		1.4	0.3441	0	0	0
242394_at	CNKSR3	154043	CNKSR family member 3	21	25	24	23.2	20	30	21	23.4	25	25	23	24.4	35	31	32	32.7		1.01	1	1.1	0.9481	0	0	0		1.4	0.1023	0	0	0
212839_s_at	SSA2	6738	TROVE domain family, member 2	14	17	15	15.5	14	13	15	13.9	14	14	16	14.6	20	22	24	21.8		-1.11	1	-1.1	0.9437	0	0	0		1.4	0.1131	0	0	0
212198_s_at	TM9SF4	9777	transmembrane 9 superfamily protein member 4	91	115	113	106	120	106	117	114.2	109	103	123	111.2	149	144	155	149.2		1.08	1	1	0.9697	0	0	0		1.4	0.1457	0	0	0
221918_at	PCTK2	5128	PCTAIRE protein kinase 2	288	301	294	294.3	296	249	308	283.1	309	293	295	298.7	358	466	425	414.1		-1.04	1	1	0.9614	0	0	0		1.4	0.1448	0	0	0
1555579_s_at	PTPRM	5797	protein tyrosine phosphatase, receptor type, M	300	324	332	318.6	329	312	334	324.6	327	316	331	325	406	462	480	448.2		1.02	1	1	0.966	0	0	0		1.4	0.0909	0	0	0
225481_at	FRMD6	122786	FERM domain containing 6	65	71	74	69.9	57	46	78	59	68	82	65	71.2	70	124	109	98.4		-1.19	1	1	0.9869	0	0	0		1.4	0.471	0	0	0
240721_at	KIAA1967	57805	KIAA1967	24	23	29	25.5	25	19	25	22.8	23	25	26	25	29	34	47	35.9		-1.12	1	-1	0.9853	0	0	0		1.4	0.416	0	0	0
231817_at	USP53	54532	ubiquitin specific peptidase 53	60	58	64	60.4	60	38	68	53.9	49	67	60	57.9	57	101	106	85		-1.12	1	-1	0.9756	0	0	0		1.4	0.5182	0	0	0
219508_at	GCNT3	9245	glucosaminyl (N-acetyl) transferase 3, mucin type	729	785	750	754.3	738	724	803	754.2	607	635	650	630.6	1070	1063	1050	1061		-1	1	-1.2	0.496	0	0	0		1.4	0.0148	0	0	0
217957_at	GTL3	29105	gene trap locus 3 (mouse)	398	455	419	423.5	401	354	439	396.4	408	397	404	402.8	590	600	597	595.7		-1.07	1	-1.1	0.9177	0	0	0		1.4	0.0437	0	0	0
52164_at	C11orf24	53838	chromosome 11 open reading frame 24	215	257	264	244.2	245	226	252	240.5	253	262	273	262.5	323	353	355	343.5		-1.02	1	1.1	0.9324	0	0	0		1.4	0.1237	0	0	0
225047_at	NUPL1	9818	nucleoporin like 1	49	48	48	48.2	46	41	49	45.2	46	58	52	52.1	44	89	78	67.8		-1.07	1	1.1	0.9215	0	0	0		1.4	0.5534	0	0	0
218268_at	TBC1D15	64786	TBC1 domain family, member 15	170	183	187	180.1	186	132	208	172.3	188	186	187	186.7	226	268	268	253.2		-1.05	1	1	0.9179	0	0	0		1.4	0.1022	0	0	0
225397_at	CCDC32	90416	coiled-coil domain containing 32	50	56	51	52.3	57	38	56	49.6	49	56	55	53.2	60	84	78	73.5		-1.05	1	1	0.9822	0	0	0		1.4	0.2443	0	0	0
210297_s_at	MSMB	4477	microseminoprotein, beta-	22	22	26	23.4	27	27	29	27.5	24	32	26	27.1	27	37	36	32.9		1.18	1	1.2	0.8926	0	0	0		1.4	0.2503	0	0	0
200970_s_at	SERP1	27230	stress-associated endoplasmic reticulum protein 1	339	325	372	344.9	367	314	363	347.2	357	420	394	389.6	407	533	524	484.5		1.01	1	1.1	0.8649	0	0	0		1.4	0.2093	0	0	0
226328_at	KLF16	83855	Kruppel-like factor 16	46	51	49	48.7	51	57	60	55.8	56	51	49	51.7	60	71	74	68.4		1.15	1	1.1	0.9176	0	0	0		1.4	0.1208	0	0	0
1557055_s_at	LOC284591	284591	hypothetical protein LOC284591	59	71	67	65.4	71	54	67	63.6	77	71	68	71.9	106	90	81	91.9		-1.03	1	1.1	0.904	0	0	0		1.4	0.2188	0	0	0
202765_s_at	FBN1	2200	fibrillin 1 (Marfan syndrome)	18	20	23	20.5	23	19	24	22	23	23	24	23.5	27	32	27	28.8		1.07	1	1.1	0.8794	0	0	0		1.4	0.1873	0	0	0
218343_s_at	GTF3C3	9330	general transcription factor IIIC, polypeptide 3, 102kDa	227	235	236	232.4	236	220	257	237.1	263	247	262	257.3	320	330	329	326.4		1.02	1	1.1	0.6151	0	0	0		1.4	0.0082	0	0	0
227640_s_at	RP9 /// LOC441212	441212 /// 6100	retinitis pigmentosa 9 (autosomal dominant) /// PNAS-13	88	97	98	94	83	79	95	85.4	94	97	96	95.5	130	133	132	132		-1.1	1	1	0.9761	0	0	0		1.4	0.0373	0	0	0
210612_s_at	SYNJ2	8871	synaptojanin 2	36	43	48	42	45	26	54	39.6	47	46	37	43	41	61	82	59		-1.06	1	1	0.9871	0	0	0		1.4	0.5554	0	0	0
205089_at	ZNF7	7553	zinc finger protein 7 (KOX 4, clone HF.16)	106	120	133	119.2	125	109	130	121.1	138	143	144	141.9	147	182	175	167.3		1.02	1	1.2	0.8115	0	0	0		1.4	0.1974	0	0	0
204141_at	TUBB2	7280	tubulin, beta 2	580	649	667	631.1	559	515	601	557.3	544	597	557	565.7	762	942	968	885.9		-1.13	1	-1.1	0.8509	0	0	0		1.4	0.1758	0	0	0
201298_s_at	MOBK1B	55233	MOB1, Mps One Binder kinase activator-like 1B (yeast)	313	313	315	313.8	326	268	325	304.9	304	318	322	314.2	399	454	471	440.3		-1.03	1	1	0.9947	0	0	0		1.4	0.0693	0	0	0
238035_at	SP3	6670	Sp3 transcription factor	97	96	110	100.5	112	76	114	99.2	113	112	112	112.2	107	159	165	141.1		-1.01	1	1.1	0.8178	0	0	0		1.4	0.3761	0	0	0
222751_at	FLJ22313	64224	hypothetical protein FLJ22313	224	200	216	213.1	214	170	217	199.1	168	215	186	188.7	245	339	322	298.9		-1.07	1	-1.1	0.901	0	0	0		1.4	0.243	0	0	0
209941_at	RIPK1	8737	receptor (TNFRSF)-interacting serine-threonine kinase 1	63	67	69	66.2	67	62	74	67.3	69	65	70	68.2	77	101	103	92.9		1.02	1	1	0.9569	0	0	0		1.4	0.2191	0	0	0
201834_at	PRKAB1	5564	protein kinase, AMP-activated, beta 1 non-catalytic subunit	104	95	99	98.9	119	104	103	108.5	94	104	106	101.5	122	149	146	138.8		1.1	1	1	0.9683	0	0	0		1.4	0.1181	0	0	0
229582_at	C18orf37	125476	chromosome 18 open reading frame 37	193	229	221	213.9	210	195	218	207.5	200	224	227	216.5	303	306	291	299.9		-1.03	1	1	0.989	0	0	0		1.4	0.0786	0	0	0
210148_at	HIPK3	10114	homeodomain interacting protein kinase 3	19	18	19	18.7	19	16	23	19.3	17	26	23	21.9	19	31	30	26.3		1.03	1	1.2	0.9241	0	0	0		1.4	0.4201	0	0	0
220009_at	LONRF3	79836	LON peptidase N-terminal domain and ring finger 3	42	44	42	42.7	36	33	34	34.3	38	42	37	38.9	55	64	60	59.8		-1.25	1	-1.1	0.8544	0	0	0		1.4	0.0577	0	0	0
205322_s_at	MTF1	4520	metal-regulatory transcription factor 1	59	62	60	60.4	54	71	64	62.7	69	60	62	63.2	81	92	82	84.6		1.04	1	1	0.9373	0	0	0		1.4	0.0555	0	0	0
222262_s_at	ETNK1	55500	ethanolamine kinase 1	83	94	90	88.9	86	64	90	79.1	80	87	79	82.3	101	137	139	124.5		-1.12	1	-1.1	0.8931	0	0	0		1.4	0.2671	0	0	0
219378_at	NARG1L	79612	NMDA receptor regulated 1-like	116	119	119	118.1	111	82	106	98.5	106	128	118	116.7	129	181	195	165.5		-1.2	1	-1	0.9879	0	0	0		1.4	0.3248	0	0	0
205969_at	AADAC	13	arylacetamide deacetylase (esterase)	134	132	134	133.1	127	126	137	129.7	125	141	141	135.4	187	180	192	186.5		-1.03	1	1	0.9761	0	0	0		1.4	0.012	0	0	0
214035_x_at	LOC399491	399491	LOC399491 protein	231	230	215	225.3	239	231	199	222.5	281	211	239	242.1	358	303	289	315.6		-1.01	1	1.1	0.9519	0	0	0		1.4	0.1201	0	0	0
231918_s_at	GFM2	84340	G elongation factor, mitochondrial 2	71	86	81	79	81	66	84	76.8	72	81	82	78	88	120	128	110.7		-1.03	1	-1	0.989	0	0	0		1.4	0.331	0	0	0
240700_at	TOR1AIP2	163590	torsin A interacting protein 2	34	33	28	31.5	34	31	34	33	33	34	29	31.9	40	43	51	44.1		1.05	1	1	0.9899	0	0	0		1.4	0.1877	0	0	0
205070_at	ING3	54556	inhibitor of growth family, member 3	88	95	86	89.9	85	62	105	82.2	86	91	88	88.5	97	134	154	125.9		-1.09	1	-1	0.9753	0	0	0		1.4	0.3664	0	0	0
227230_s_at	KIAA1211	57482	KIAA1211 protein	24	26	26	25.3	25	19	26	23.2	20	21	22	21.1	28	44	36	35.4		-1.09	1	-1.2	0.5673	0	0	0		1.4	0.3425	0	0	0
213112_s_at	SQSTM1	8878	sequestosome 1	162	192	182	178	184	209	180	190.6	211	188	191	196.3	258	234	256	249.3		1.07	1	1.1	0.8926	0	0	0		1.4	0.0905	0	0	0
231718_at	SLU7	10569	step II splicing factor SLU7	177	164	177	172.7	168	143	177	162	183	201	212	198.2	183	257	301	241.8		-1.07	1	1.1	0.7969	0	0	0		1.4	0.3929	0	0	0
213659_at	ZNF75	7626	zinc finger protein 75 (D8C6)	27	30	32	29.9	29	32	33	31	32	32	33	32.1	33	46	47	41.8		1.04	1	1.1	0.904	0	0	0		1.4	0.3071	0	0	0
210338_s_at	HSPA8	3312	heat shock 70kDa protein 8	3598	3681	3464	3580	3295	3315	3599	3400.3	4294	4192	4160	4214.9	4841	5042	5152	5009.8		-1.05	1	1.2	0.4012	0	0	0		1.4	0.0196	0	0	0
217996_at	PHLDA1	22822	pleckstrin homology-like domain, family A, member 1	324	328	365	338.6	383	294	355	341.8	449	536	488	489.5	426	491	509	473.8		1.01	1	1.4	0.5161	0	0	0		1.4	0.1119	0	0	0
222315_at			Transcribed locus, weakly similar to XP_518244.1 PREDICTED: similar to sirtuin 5 isoform 2; sir2-like 5; silent mating type information regulation 2, S.cerevisiae, homolog 5; sirtuin (silent mating type information regulation 2, S.cerevisiae, homolog) 5; sirtuin silent mating type information regulation 2 h... [Pan troglodytes]	24	27	26	25.5	30	31	27	29.2	29	23	29	27	29	38	40	35.7		1.14	1	1.1	0.9607	0	0	0		1.4	0.2448	0	0	0
223101_s_at	ARPC5L	81873	actin related protein 2/3 complex, subunit 5-like	118	122	119	119.4	127	118	134	126.2	127	128	127	127.5	166	163	172	167		1.06	1	1.1	0.4628	0	0	0		1.4	0.012	0	0	0
229409_s_at	C10orf22	84890	Chromosome 10 open reading frame 22	17	23	19	19.4	18	38	22	24.8	22	22	19	20.9	35	26	22	27.2		1.28	1	1.1	0.9572	0	0	0		1.4	0.4142	0	0	0
227559_at	C6orf66	29078	Chromosome 6 open reading frame 66	76	77	66	72.8	67	47	72	61.1	78	84	76	79.2	86	114	107	101.8		-1.19	1	1.1	0.9033	0	0	0		1.4	0.2201	0	0	0
224250_s_at	SECISBP2	79048	SECIS binding protein 2	234	250	259	247.6	258	206	262	240.7	262	270	263	265	350	339	350	346.3		-1.03	1	1.1	0.8427	0	0	0		1.4	0.0293	0	0	0
204109_s_at	NFYA	4800	nuclear transcription factor Y, alpha	32	35	29	32.1	39	45	34	39.1	37	35	43	37.9	42	43	50	44.9		1.22	1	1.2	0.8686	0	0	0		1.4	0.1505	0	0	0
223575_at	KIAA1549	57670	KIAA1549 protein	63	53	50	55.1	62	45	58	54.6	50	49	55	51.4	66	84	82	77.1		-1.01	1	-1.1	0.9477	0	0	0		1.4	0.2462	0	0	0
221490_at	UBAP1	51271	ubiquitin associated protein 1	149	162	165	158.3	153	139	158	149.8	150	148	155	151.1	229	213	223	221.4		-1.06	1	-1	0.9066	0	0	0		1.4	0.0413	0	0	0
216960_s_at	ZNF133	7692	zinc finger protein 133 (clone pHZ-13)	58	64	68	63.2	63	58	76	65.1	68	74	79	73.5	80	90	97	88.4		1.03	1	1.2	0.8379	0	0	0		1.4	0.139	0	0	0
1555862_s_at	MICAL-L2	79778	MICAL-like 2	15	13	13	13.5	15	12	12	12.6	16	15	14	14.9	18	19	20	18.9		-1.07	1	1.1	0.904	0	0	0		1.4	0.0792	0	0	0
201861_s_at	LRRFIP1	9208	leucine rich repeat (in FLII) interacting protein 1	229	237	255	239.9	266	240	279	261.2	242	253	252	249.1	313	324	371	335.3		1.09	1	1	0.9322	0	0	0		1.4	0.0999	0	0	0
225874_at	LOC124402	124402	LOC124402	88	98	97	94.3	87	85	97	89.4	104	99	105	102.7	145	123	129	131.8		-1.05	1	1.1	0.8477	0	0	0		1.4	0.0967	0	0	0
202023_at	EFNA1	1942	ephrin-A1	99	104	102	101.6	113	102	109	108	89	98	91	92.7	142	139	144	142		1.06	1	-1.1	0.7779	0	0	0		1.4	0.0103	0	0	0
243395_at	DAF	1604	Decay accelerating factor for complement (CD55, Cromer blood group system)	35	23	25	27.1	29	22	27	25.9	28	29	26	27.5	30	41	44	37.9		-1.05	1	1	0.9935	0	0	0		1.4	0.4486	0	0	0
201964_at	ALS4	23064	amyotrophic lateral sclerosis 4	140	138	146	141.3	135	126	153	137.7	149	155	157	153.7	198	181	215	197.4		-1.03	1	1.1	0.6847	0	0	0		1.4	0.0767	0	0	0
213620_s_at	ICAM2	3384	intercellular adhesion molecule 2	32	31	28	30.3	38	58	31	41.1	34	38	35	35.5	60	40	31	42.3		1.36	1	1.2	0.791	0	0	0		1.4	0.5138	0	0	0
219961_s_at	C20orf19	55857	chromosome 20 open reading frame 19	93	100	94	95.5	95	85	93	90.8	81	90	107	92.3	119	142	141	133.4		-1.05	1	-1	0.977	0	0	0		1.4	0.0967	0	0	0
240910_at	SLC13A3	64849	Solute carrier family 13 (sodium-dependent dicarboxylate transporter), member 3	14	14	12	13.6	14	14	13	13.6	14	14	13	13.8	18	16	23	19		-1.01	1	1	0.9859	0	0	0		1.4	0.26	0	0	0
225373_at	C10orf54	64115	chromosome 10 open reading frame 54	52	64	59	58.1	58	59	67	61.2	65	63	65	64.4	81	81	82	81.1		1.05	1	1.1	0.8853	0	0	0		1.4	0.0946	0	0	0
221284_s_at	SRC	6714	v-src sarcoma (Schmidt-Ruppin A-2) viral oncogene homolog (avian)	26	31	24	27.1	27	38	31	31.7	24	26	33	27.4	43	34	38	37.8		1.17	1	1	0.9927	0	0	0		1.4	0.2358	0	0	0
212190_at	SERPINE2	5270	serpin peptidase inhibitor, clade E (nexin, plasminogen activator inhibitor type 1), member 2	250	236	267	250.6	268	250	285	267.2	252	256	267	258.3	318	354	381	349.9		1.07	1	1	0.9556	0	0	0		1.4	0.1057	0	0	0
203241_at	UVRAG	7405	UV radiation resistance associated gene	77	84	93	84.6	86	81	89	85.5	88	90	87	88.6	104	127	126	118.2		1.01	1	1	0.9536	0	0	0		1.4	0.1765	0	0	0
227325_at	LOC255783	255783	hypothetical protein LOC255783	74	90	84	82.4	84	65	84	77.3	84	74	88	81.7	101	112	134	115		-1.07	1	-1	0.9927	0	0	0		1.4	0.2325	0	0	0
205739_x_at	ZNF588	51427	zinc finger protein 588	23	18	24	21.3	22	18	20	19.9	25	27	30	27.1	22	35	34	29.8		-1.07	1	1.3	0.8372	0	0	0		1.4	0.4957	0	0	0
226797_at			MRNA; cDNA DKFZp434G0972 (from clone DKFZp434G0972)	117	103	100	106.3	99	83	105	95.3	99	140	130	121.7	105	178	175	148.4		-1.12	1	1.1	0.9247	0	0	0		1.4	0.4859	0	0	0
212644_s_at	C14orf32	93487	chromosome 14 open reading frame 32	383	368	387	379.3	385	361	395	380.1	402	447	397	414.6	487	558	546	529.2		1	1	1.1	0.8434	0	0	0		1.4	0.0589	0	0	0
223796_at	CNTNAP3 /// CNTNAP3B	389734 /// 79937	contactin associated protein-like 3 /// contactin associated protein-like 3B	169	157	176	167.1	160	126	150	144.5	154	169	174	165.4	189	254	264	233.1		-1.16	1	-1	0.9879	0	0	0		1.4	0.2689	0	0	0
226863_at			Full-length cDNA clone CS0DJ001YJ05 of T cells (Jurkat cell line) Cot 10-normalized of Homo sapiens (human)	16	19	19	18.1	23	18	26	22.3	20	23	25	22.7	20	28	29	25.3		1.23	1	1.3	0.8304	0	0	0		1.4	0.3545	0	0	0
235056_at	ETV6	2120	ets variant gene 6 (TEL oncogene)	36	42	41	39.7	43	33	40	38.8	38	43	36	39	41	69	61	55.4		-1.03	1	-1	0.9842	0	0	0		1.4	0.4391	0	0	0
208926_at	NEU1	4758	sialidase 1 (lysosomal sialidase)	114	132	130	125	117	87	119	106.6	131	124	131	128.8	166	183	173	174.1		-1.17	1	1	0.964	0	0	0		1.4	0.0797	0	0	0
235756_at	SAMD4	23034	Sterile alpha motif domain containing 4	19	20	25	21.2	26	22	24	24	23	24	26	24.1	26	30	33	29.6		1.13	1	1.1	0.907	0	0	0		1.4	0.2701	0	0	0
204907_s_at	BCL3	602	B-cell CLL/lymphoma 3	56	70	68	64.2	75	120	83	90.8	63	68	81	70.4	91	91	87	89.5		1.41	1	1.1	0.9452	0	0	0		1.4	0.1279	0	0	0
204678_s_at	KCNK1	3775	potassium channel, subfamily K, member 1	52	49	51	50.4	46	49	66	52.8	55	51	49	51.7	66	72	73	70.2		1.05	1	1	0.9614	0	0	0		1.4	0.0443	0	0	0
207395_at	BTN1A1	696	butyrophilin, subfamily 1, member A1	19	14	16	16.2	18	14	14	15.1	17	16	16	16.4	19	24	25	22.5		-1.07	1	1	0.9916	0	0	0		1.4	0.2935	0	0	0
213348_at	CDKN1C	1028	Cyclin-dependent kinase inhibitor 1C (p57, Kip2)	22	21	22	21.8	25	23	27	25	20	22	22	21.5	24	34	35	30.3		1.15	1	-1	0.9795	0	0	0		1.4	0.3151	0	0	0
219870_at	ATF7IP2	80063	activating transcription factor 7 interacting protein 2	53	52	56	53.4	51	43	57	50.2	55	50	46	50.3	76	71	76	74.4		-1.06	1	-1.1	0.9315	0	0	0		1.4	0.026	0	0	0
213656_s_at	KNS2	3831	kinesin 2	136	161	164	152.9	160	147	167	158	140	158	154	150.4	206	216	217	212.8		1.03	1	-1	0.9859	0	0	0		1.4	0.1049	0	0	0
228305_at	ZNF565	147929	zinc finger protein 565	65	73	79	71.8	71	41	70	59	84	80	73	78.5	95	103	102	100		-1.22	1	1.1	0.9158	0	0	0		1.4	0.1003	0	0	0
231880_at	FAM40B	57464	family with sequence similarity 40, member B	34	27	29	29.9	34	28	29	30.1	31	33	33	32.1	27	45	59	41.6		1.01	1	1.1	0.9296	0	0	0		1.4	0.6032	0	0	0
230296_at	LOC146174	146174	Chromosome 16 open reading frame 52	254	305	290	282.1	254	235	307	263.9	321	326	310	318.9	386	398	393	392.6		-1.07	1	1.1	0.8521	0	0	0		1.4	0.088	0	0	0
212127_at	RANGAP1	5905	Ran GTPase activating protein 1	131	158	142	143.2	137	143	163	147.3	161	149	163	157.7	216	182	202	199.2		1.03	1	1.1	0.8926	0	0	0		1.4	0.1412	0	0	0
217432_s_at	IDS	3423	iduronate 2-sulfatase (Hunter syndrome)	62	61	61	61.2	61	48	62	56.5	64	64	54	60.4	89	83	84	85.2		-1.08	1	-1	0.9859	0	0	0		1.4	0.0192	0	0	0
225392_at	GFM2	84340	G elongation factor, mitochondrial 2	277	298	297	290.4	293	267	296	285.2	284	312	298	297.9	376	419	419	404.1		-1.02	1	1	0.9591	0	0	0		1.4	0.0549	0	0	0
213750_at			Full length insert cDNA YH77E09	120	126	126	123.8	125	79	126	107.7	125	129	125	126	164	175	179	172.2		-1.15	1	1	0.9388	0	0	0		1.4	0.0272	0	0	0
214196_s_at	TPP1	1200	tripeptidyl peptidase I	47	58	53	52.6	53	59	50	53.9	49	54	58	53.7	72	70	78	73.2		1.02	1	1	0.9854	0	0	0		1.4	0.1258	0	0	0
1553300_a_at	DGKH	160851	diacylglycerol kinase, eta	16	15	16	15.6	16	17	16	16.3	16	14	18	16.2	16	24	26	21.7		1.04	1	1	0.9683	0	0	0		1.4	0.408	0	0	0
201411_s_at	PLEKHB2	55041	pleckstrin homology domain containing, family B (evectins) member 2	223	266	238	241.7	214	264	258	244	253	263	272	262.5	312	347	350	336.2		1.01	1	1.1	0.9028	0	0	0		1.4	0.1067	0	0	0
226524_at	MGC26717	285237	hypothetical protein MGC26717	98	102	104	101.3	95	83	105	93.8	100	110	95	101.5	128	150	146	140.9		-1.08	1	1	0.9982	0	0	0		1.4	0.0786	0	0	0
1557487_at			CDNA clone IMAGE:4797099	44	44	48	45.4	38	37	50	41.2	45	55	50	50.2	60	60	70	63.1		-1.1	1	1.1	0.9028	0	0	0		1.4	0.0993	0	0	0
203678_at	KIAA1018	22909	KIAA1018 protein	56	53	64	57.2	58	57	60	58.4	59	53	59	57	72	89	78	79.5		1.02	1	-1	0.9982	0	0	0		1.4	0.1663	0	0	0
206754_s_at	CYP2B7P1	1556	cytochrome P450, family 2, subfamily B, polypeptide 7 pseudogene 1	35	34	39	36.2	34	30	41	34.9	37	30	31	32.3	42	55	55	50.3		-1.04	1	-1.1	0.9005	0	0	0		1.4	0.2177	0	0	0
235369_at	C14orf28	122525	chromosome 14 open reading frame 28	45	38	42	41.5	41	36	45	40.5	44	40	43	42	47	68	60	57.7		-1.02	1	1	0.9867	0	0	0		1.4	0.308	0	0	0
202387_at	BAG1	573	BCL2-associated athanogene /// BCL2-associated athanogene	193	205	197	198.3	203	184	216	200.4	198	222	212	210.3	275	292	261	275.8		1.01	1	1.1	0.8951	0	0	0		1.4	0.0408	0	0	0
204175_at	ZNF593	51042	zinc finger protein 593	140	163	145	149.1	149	149	168	155.3	139	168	168	157.9	204	203	215	207.3		1.04	1	1.1	0.9576	0	0	0		1.4	0.0693	0	0	0
222758_s_at	HSPA5BP1	54972	heat shock 70kDa protein 5 (glucose-regulated protein, 78kDa) binding protein 1	27	27	29	27.7	28	42	35	34.6	29	31	37	31.9	43	33	40	38.5		1.25	1	1.2	0.89	0	0	0		1.4	0.1628	0	0	0
225703_at	KIAA1545	57666	KIAA1545 protein	86	98	107	96.7	85	102	100	95.2	82	96	97	91.7	110	144	154	134.4		-1.02	1	-1.1	0.9631	0	0	0		1.4	0.3097	0	0	0
221709_s_at	C14orf131	55778	chromosome 14 open reading frame 131 /// chromosome 14 open reading frame 131	60	51	60	56.9	57	74	61	63.4	65	56	64	61.4	84	81	73	79.1		1.11	1	1.1	0.9296	0	0	0		1.4	0.1194	0	0	0
210523_at	BMPR1B	658	bone morphogenetic protein receptor, type IB	35	34	40	36.3	35	51	43	42.8	28	41	38	35.5	48	51	52	50.4		1.18	1	-1	0.9899	0	0	0		1.4	0.0923	0	0	0
227371_at	BAIAP2L1	55971	BAI1-associated protein 2-like 1	130	145	132	135.6	125	130	138	131.1	106	111	126	113.8	176	183	209	188.5		-1.03	1	-1.2	0.791	0	0	0		1.4	0.107	0	0	0
203999_at	SYT1	6857	synaptotagmin I	108	113	116	112.5	146	105	132	126.7	119	128	128	124.9	158	169	143	156.4		1.13	1	1.1	0.7555	0	0	0		1.4	0.0828	0	0	0
225316_at	MFSD2	84879	major facilitator superfamily domain containing 2	48	45	47	46.5	42	49	41	44	49	40	45	44.5	68	64	62	64.7		-1.06	1	-1	0.9602	0	0	0		1.4	0.0351	0	0	0
219911_s_at	SLCO4A1	28231	solute carrier organic anion transporter family, member 4A1	52	51	68	56.7	49	62	56	55.4	82	86	85	84.3	77	80	80	78.8		-1.02	1	1.5	0.6084	0	0	0		1.4	0.2003	0	0	0
1553734_at	AK7	122481	adenylate kinase 7	30	35	32	32.3	35	35	38	35.8	35	31	33	32.9	39	47	50	44.9		1.11	1	1	0.9829	0	0	0		1.4	0.1909	0	0	0
228374_at	C10orf28	27291	chromosome 10 open reading frame 28	68	84	77	76.3	71	65	76	70.9	61	70	79	69.4	95	104	121	105.9		-1.08	1	-1.1	0.9404	0	0	0		1.4	0.2009	0	0	0
222792_s_at	HSPC128	29080	HSPC128 protein	311	346	339	331.5	307	323	333	320.9	357	354	314	341.1	450	455	476	460.2		-1.03	1	1	0.9687	0	0	0		1.4	0.04	0	0	0
218764_at	PRKCH	5583	protein kinase C, eta	78	89	84	83.6	83	60	83	74.9	78	89	88	84.8	108	115	126	116.1		-1.12	1	1	0.9854	0	0	0		1.4	0.0949	0	0	0
213130_at	ZNF473	25888	zinc finger protein 473	65	66	64	65.2	64	49	57	56.3	83	69	68	73	102	93	78	90.4		-1.16	1	1.1	0.8772	0	0	0		1.4	0.1547	0	0	0
207558_s_at	PITX2	5308	paired-like homeodomain transcription factor 2	13	13	13	12.9	14	12	12	12.7	12	13	14	12.7	14	17	23	17.9		-1.01	1	-1	0.9867	0	0	0		1.4	0.3518	0	0	0
212923_s_at	C6orf145	221749	chromosome 6 open reading frame 145	87	80	80	82.5	74	71	87	76.7	82	79	87	82.7	103	111	130	114.5		-1.08	1	1	0.9972	0	0	0		1.4	0.143	0	0	0
206223_at	LMTK2	22853	lemur tyrosine kinase 2	21	28	20	22.9	29	27	21	25.4	25	25	24	24.7	31	32	32	31.8		1.11	1	1.1	0.9607	0	0	0		1.4	0.27	0	0	0
1555562_a_at	ZCCHC7	84186	zinc finger, CCHC domain containing 7	30	30	27	28.8	27	19	28	24.2	24	28	27	26.6	36	41	43	39.9		-1.19	1	-1.1	0.9195	0	0	0		1.4	0.1229	0	0	0
204753_s_at	HLF	3131	hepatic leukemia factor	21	20	20	20.2	21	20	24	21.6	22	21	21	21.4	27	29	27	27.9		1.07	1	1.1	0.8048	0	0	0		1.4	0.0276	0	0	0
213360_s_at	POM121 /// LOC340318 /// LOC441253	340318 /// 441253 /// 9883	POM121 membrane glycoprotein (rat) /// nuclear envelope pore membrane LOC340318 /// nuclear envelope pore membrane LOC441253	360	403	402	387.8	390	365	373	376.1	432	434	438	434.8	550	533	530	537.7		-1.03	1	1.1	0.771	0	0	0		1.4	0.0464	0	0	0
212369_at	ZNF384	171017	zinc finger protein 384	184	160	176	172.8	187	196	188	190.1	242	230	246	239.5	246	239	234	239.5		1.1	1	1.4	0.4467	0	0	0		1.4	0.0571	0	0	0
200758_s_at	NFE2L1	4779	nuclear factor (erythroid-derived 2)-like 1	411	447	388	414.2	388	440	434	420.1	424	383	407	404.3	619	531	575	574.2		1.01	1	-1	0.9709	0	0	0		1.4	0.1009	0	0	0
214315_x_at	CALR	811	calreticulin	182	97	97	119.5	219	63	110	114.9	131	117	139	128.4	144	159	198	165.6		-1.04	1	1.1	0.9799	0	0	0		1.4	0.6029	0	0	0
202777_at	SHOC2	8036	soc-2 suppressor of clear homolog (C. elegans)	275	265	272	270.7	264	236	309	267.9	239	279	266	260.8	341	401	386	375.2		-1.01	1	-1	0.9543	0	0	0		1.4	0.0758	0	0	0
228942_s_at	DAB2IP	153090	DAB2 interacting protein	22	26	22	23.3	27	31	30	29.6	22	25	31	25.7	44	26	29	32.2		1.27	1	1.1	0.952	0	0	0		1.4	0.4804	0	0	0
213021_at	GOSR1	9527	golgi SNAP receptor complex member 1	168	177	179	174.4	189	137	191	170.4	191	182	179	183.8	230	242	253	241.7		-1.02	1	1.1	0.8658	0	0	0		1.4	0.0354	0	0	0
214954_at	KIAA0527	26032	KIAA0527 protein	13	13	12	12.4	14	12	14	13.2	36	34	29	32.7	13	18	21	17.2		1.06	1	2.6	0.2244	0	0	0		1.4	0.3934	0	0	0
235516_at	SLA/LP	51091	soluble liver antigen/liver pancreas antigen	18	20	20	19.2	22	23	21	21.9	20	20	20	20	27	26	27	26.6		1.14	1	1	0.9361	0	0	0		1.4	0.054	0	0	0
207247_s_at	ZFX /// ZFY	7543 /// 7544	zinc finger protein, X-linked /// zinc finger protein, Y-linked	19	18	22	19.5	17	18	20	18	21	23	21	21.8	20	30	33	27		-1.08	1	1.1	0.8814	0	0	0		1.4	0.4617	0	0	0
203552_at	MAP4K5	11183	mitogen-activated protein kinase kinase kinase kinase 5	98	95	92	94.7	97	64	99	85.1	90	107	99	98.1	105	147	146	131.1		-1.11	1	1	0.9614	0	0	0		1.4	0.2879	0	0	0
203787_at	SSBP2	23635	single-stranded DNA binding protein 2	48	59	61	55.6	55	44	67	54.8	54	60	50	54.4	56	84	97	77		-1.01	1	-1	0.9864	0	0	0		1.4	0.4955	0	0	0
231907_at	ABL2	27	V-abl Abelson murine leukemia viral oncogene homolog 2 (arg, Abelson-related gene)	84	92	93	89.2	91	68	103	86	88	81	91	86.6	143	108	122	123.6		-1.04	1	-1	0.9657	0	0	0		1.4	0.1927	0	0	0
212612_at	RCOR1	23186	REST corepressor 1	175	171	177	174.5	179	138	195	168.9	224	239	222	228	217	260	250	241.6		-1.03	1	1.3	0.2797	0	0	0		1.4	0.0894	0	0	0
200033_at	DDX5	1655	DEAD (Asp-Glu-Ala-Asp) box polypeptide 5 /// DEAD (Asp-Glu-Ala-Asp) box polypeptide 5	2605	2415	2434	2483.1	2635	2259	2587	2487.9	2555	2753	2660	2654.9	3239	3617	3468	3437.9		1	1	1.1	0.8555	0	0	0		1.4	0.0495	0	0	0
209628_at	NXT2	55916	nuclear transport factor 2-like export factor 2	275	307	314	298.4	323	247	308	290.7	317	336	322	325	392	415	433	413		-1.03	1	1.1	0.8681	0	0	0		1.4	0.0737	0	0	0
213805_at	ABHD5	51099	abhydrolase domain containing 5	24	25	31	26.5	27	16	30	23.5	26	28	26	26.7	23	44	49	36.7		-1.13	1	1	0.994	0	0	0		1.4	0.6408	0	0	0
207922_s_at	MAEA	10296	macrophage erythroblast attacher	223	246	251	239.9	245	212	250	235.1	236	216	229	226.6	312	339	346	332		-1.02	1	-1.1	0.9168	0	0	0		1.4	0.0705	0	0	0
213794_s_at	C14orf120	25983	chromosome 14 open reading frame 120	332	344	343	339.7	335	324	352	336.7	331	348	327	335.1	457	481	472	470		-1.01	1	-1	0.9648	0	0	0		1.4	0.012	0	0	0
211685_s_at	NCALD	83988	neurocalcin delta /// neurocalcin delta	54	61	76	62.9	72	49	73	63.7	68	67	67	66.9	86	90	86	87		1.01	1	1.1	0.9657	0	0	0		1.4	0.2488	0	0	0
201057_s_at	GOLGB1	2804	golgi autoantigen, golgin subfamily b, macrogolgin (with transmembrane signal), 1	206	192	214	203.8	219	193	248	218.9	225	210	234	222.8	255	291	303	282		1.07	1	1.1	0.8662	0	0	0		1.4	0.107	0	0	0
211296_x_at	UBC	7316	ubiquitin C	9094	9283	9491	9288	9244	9392	9317	9317.6	8906	8835	9019	8919.5	12616	12840	13094	12848.4		1	1	-1	0.7788	0	0	0		1.4	0.0095	0	0	0
223658_at	KCNK6	9424	potassium channel, subfamily K, member 6	22	17	18	18.7	20	20	20	20.2	20	18	17	18.2	23	26	28	25.9		1.08	1	-1	0.9842	0	0	0		1.4	0.25	0	0	0
1565807_at			CDNA clone IMAGE:5301169	13	15	13	13.8	13	18	15	15	13	15	16	14.8	23	18	16	19.1		1.09	1	1.1	0.9262	0	0	0		1.4	0.2944	0	0	0
223773_s_at	C1orf79	85028	chromosome 1 open reading frame 79	166	162	156	161.4	153	141	172	154.4	152	153	165	156.9	183	249	244	223.2		-1.05	1	-1	0.9453	0	0	0		1.4	0.2431	0	0	0
226761_at	ZNFN1A4	64375	zinc finger protein, subfamily 1A, 4 (Eos)	29	38	40	35	38	35	37	37	36	40	43	39.5	44	46	56	48.4		1.06	1	1.1	0.9315	0	0	0		1.4	0.3212	0	0	0
202522_at	PITPNB	23760	phosphatidylinositol transfer protein, beta	431	461	452	447.7	440	408	416	421.2	457	436	443	445.4	668	601	591	619		-1.06	1	-1	0.9879	0	0	0		1.4	0.0576	0	0	0
225472_at	BAT4	7918	HLA-B associated transcript 4	181	196	201	192.4	174	145	202	172.1	259	282	258	266.2	245	277	278	265.9		-1.12	1	1.4	0.4361	0	0	0		1.4	0.0819	0	0	0
225372_at	C10orf54	64115	chromosome 10 open reading frame 54	27	25	24	25.4	29	28	26	27.5	25	25	25	25.3	36	36	34	35.2		1.08	1	-1	0.9859	0	0	0		1.4	0.0372	0	0	0
1560750_at				18	16	15	16.2	16	18	16	16.7	16	19	17	17.4	24	21	23	22.4		1.03	1	1.1	0.9296	0	0	0		1.4	0.0998	0	0	0
212110_at	SLC39A14	23516	solute carrier family 39 (zinc transporter), member 14	455	437	457	449.6	450	395	480	440.1	421	418	422	420.5	585	607	675	621.1		-1.02	1	-1.1	0.5967	0	0	0		1.4	0.0625	0	0	0
1552364_s_at	MSI2	124540	musashi homolog 2 (Drosophila)	24	32	33	29.4	30	29	29	29.5	27	32	29	29.1	40	41	41	40.6		1	1	-1	0.9927	0	0	0		1.4	0.2612	0	0	0
218954_s_at	BRF2	55290	BRF2, subunit of RNA polymerase III transcription initiation factor, BRF1-like	38	38	40	38.8	31	33	38	34	34	34	38	35.4	55	53	52	53.6		-1.14	1	-1.1	0.8383	0	0	0		1.4	0.0221	0	0	0
1568616_a_at				23	20	25	22.4	22	29	21	23.9	24	21	22	22.4	38	28	28	31		1.06	1	-1	0.9993	0	0	0		1.4	0.3111	0	0	0
208313_s_at	SF1	7536	splicing factor 1	257	284	282	274	265	267	292	274.4	247	270	298	270.7	359	375	402	378.5		1	1	-1	0.9884	0	0	0		1.4	0.0654	0	0	0
228742_at			Full length insert cDNA clone YQ54B06	33	37	39	36.1	36	43	34	37.3	32	32	34	32.6	46	52	51	49.9		1.03	1	-1.1	0.8555	0	0	0		1.4	0.1046	0	0	0
201870_at	TOMM34	10953	translocase of outer mitochondrial membrane 34	163	145	172	159.7	176	146	165	161.5	155	160	153	155.7	207	238	217	220.5		1.01	1	-1	0.9703	0	0	0		1.4	0.1175	0	0	0
218412_s_at	GTF2IRD1	9569	GTF2I repeat domain containing 1	165	188	183	178.1	165	161	179	168.2	174	190	181	181.6	256	232	250	245.8		-1.06	1	1	0.9769	0	0	0		1.4	0.0747	0	0	0
227143_s_at	BID	637	BH3 interacting domain death agonist	142	142	145	143.1	145	133	144	140.7	143	134	146	140.7	193	197	202	197.5		-1.02	1	-1	0.966	0	0	0		1.4	0.0087	0	0	0
230669_at	RASA2	5922	RAS p21 protein activator 2	117	124	130	123.5	135	108	134	125.2	126	128	125	126.3	147	168	200	170.4		1.01	1	1	0.9576	0	0	0		1.4	0.2183	0	0	0
1557938_s_at	PTRF	284119	polymerase I and transcript release factor	146	150	138	144.6	128	133	129	130.1	132	144	158	144.6	188	204	208	199.6		-1.11	1	-1	0.9998	0	0	0		1.4	0.0495	0	0	0
227133_at	CXorf39	139231	chromosome X open reading frame 39	212	219	221	217.3	229	170	245	212	235	277	245	251.9	264	312	328	299.9		-1.03	1	1.2	0.7835	0	0	0		1.4	0.1246	0	0	0
225499_at	KIAA1272	57186	Chromosome 20 open reading frame 74	85	85	92	87	93	84	90	88.9	67	84	78	76.3	115	118	128	120.1		1.02	1	-1.1	0.8751	0	0	0		1.4	0.0507	0	0	0
229594_at	FLJ39441	144108	hypothetical protein FLJ39441	125	111	112	115.8	120	88	118	107.6	114	127	116	119	115	182	195	159.8		-1.08	1	1	0.9687	0	0	0		1.4	0.4696	0	0	0
1552649_a_at	RFFL	117584	ring finger and FYVE-like domain containing 1	44	53	50	49.2	52	46	52	49.8	45	57	55	52	61	72	71	68		1.01	1	1.1	0.966	0	0	0		1.4	0.1545	0	0	0
201982_s_at	PAPPA	5069	pregnancy-associated plasma protein A, pappalysin 1	83	78	77	79.4	73	78	81	77.2	70	77	77	74.6	109	109	110	109.6		-1.03	1	-1.1	0.8923	0	0	0		1.4	0.0173	0	0	0
205865_at	ARID3A	1820	AT rich interactive domain 3A (BRIGHT- like)	33	39	30	33.7	39	37	38	37.8	38	37	36	37	35	54	53	46.4		1.12	1	1.1	0.9138	0	0	0		1.4	0.4361	0	0	0
204330_s_at	MRPS12	6183	mitochondrial ribosomal protein S12	36	42	35	37.4	39	38	45	40.5	37	46	42	41.7	47	53	54	51.5		1.08	1	1.1	0.9176	0	0	0		1.4	0.1431	0	0	0
212501_at	CEBPB	1051	CCAAT/enhancer binding protein (C/EBP), beta	1429	1549	1483	1486.1	1508	1494	1631	1542.8	1339	1418	1490	1414.4	2039	2038	2072	2049.6		1.04	1	-1.1	0.9145	0	0	0		1.4	0.0191	0	0	0
235270_at	ZNF397	84307	zinc finger protein 397	15	14	15	14.9	16	18	17	16.7	16	14	19	16.2	19	21	22	20.6		1.12	1	1.1	0.9404	0	0	0		1.4	0.0777	0	0	0
220240_s_at	TMCO3	55002	transmembrane and coiled-coil domains 3	51	47	44	47.2	45	40	47	43.6	57	45	51	50.8	60	66	70	65.1		-1.08	1	1.1	0.9476	0	0	0		1.4	0.1074	0	0	0
216035_x_at	TCF7L2	6934	transcription factor 7-like 2 (T-cell specific, HMG-box)	196	198	186	193.2	181	136	197	169.3	194	218	208	206.5	258	252	291	266.3		-1.14	1	1.1	0.8888	0	0	0		1.4	0.0722	0	0	0
225284_at	LOC144871	144871	hypothetical protein LOC144871	202	215	228	214.7	229	203	249	226.2	221	240	231	230.2	271	312	306	295.9		1.05	1	1.1	0.8914	0	0	0		1.4	0.0916	0	0	0
214628_at	NHLH1	4807	nescient helix loop helix 1	39	39	32	36.6	35	30	37	33.7	34	36	36	35.2	59	47	46	50.5		-1.09	1	-1	0.9648	0	0	0		1.4	0.2534	0	0	0
201863_at	FAM32A	26017	family with sequence similarity 32, member A	330	347	323	333.3	341	338	342	340.5	348	332	356	345.2	491	431	459	459.4		1.02	1	1	0.9221	0	0	0		1.4	0.0593	0	0	0
201146_at	NFE2L2	4780	nuclear factor (erythroid-derived 2)-like 2	843	764	796	800.5	821	697	784	765.7	710	844	806	784.7	952	1207	1169	1103.1		-1.05	1	-1	0.9797	0	0	0		1.4	0.1668	0	0	0
201020_at	YWHAH	7533	tyrosine 3-monooxygenase/tryptophan 5-monooxygenase activation protein, eta polypeptide	222	215	219	218.7	214	187	225	207.8	193	228	209	209.6	271	320	315	301.4		-1.05	1	-1	0.9477	0	0	0		1.4	0.085	0	0	0
217873_at	CAB39	51719	calcium binding protein 39	280	268	253	266.8	263	260	293	271.6	292	274	294	286.3	345	370	389	367.6		1.02	1	1.1	0.8662	0	0	0		1.4	0.0642	0	0	0
207782_s_at	PSEN1	5663	presenilin 1 (Alzheimer disease 3)	125	155	151	143.2	162	142	161	154.5	158	149	173	159.5	161	207	230	197.2		1.08	1	1.1	0.9072	0	0	0		1.4	0.3371	0	0	0
244033_at	C14orf145	145508	chromosome 14 open reading frame 145	81	91	88	86.4	80	50	96	72.7	78	79	80	78.8	101	134	125	119.1		-1.19	1	-1.1	0.8263	0	0	0		1.4	0.2171	0	0	0
213325_at	PVRL3	25945	poliovirus receptor-related 3	63	65	70	66	68	46	66	59.1	68	76	73	72.1	59	113	112	90.9		-1.12	1	1.1	0.8619	0	0	0		1.4	0.5854	0	0	0
233857_s_at	ASB2	51676	ankyrin repeat and SOCS box-containing 2	18	15	17	16.5	17	24	17	19	17	18	16	16.8	27	22	20	22.7		1.15	1	1	0.9779	0	0	0		1.4	0.2313	0	0	0
202723_s_at	FOXO1A	2308	forkhead box O1A (rhabdomyosarcoma)	25	31	29	28.2	31	40	33	34.4	26	30	25	26.8	36	43	38	38.9		1.22	1	-1.1	0.9631	0	0	0		1.4	0.1576	0	0	0
202293_at	STAG1	10274	stromal antigen 1	66	81	88	78	89	59	81	75.5	84	78	80	80.6	81	121	126	107.4		-1.03	1	1	0.9777	0	0	0		1.4	0.4613	0	0	0
205548_s_at	BTG3	10950	BTG family, member 3	148	168	159	158	156	138	167	153.4	148	157	156	153.7	208	225	220	217.5		-1.03	1	-1	0.9631	0	0	0		1.4	0.0617	0	0	0
212810_s_at	SLC1A4	6509	solute carrier family 1 (glutamate/neutral amino acid transporter), member 4	46	56	59	53.3	54	62	51	55.5	51	55	56	54	69	79	72	73.3		1.04	1	1	0.9897	0	0	0		1.4	0.2031	0	0	0
210712_at	LDHAL6B	92483	lactate dehydrogenase A-like 6B	13	13	13	13.2	14	14	13	13.6	13	13	14	13.3	16	17	21	18.1		1.03	1	1	0.9859	0	0	0		1.4	0.1724	0	0	0
225418_at	PVRL2	5819	Poliovirus receptor-related 2 (herpesvirus entry mediator B)	227	247	247	240.2	235	259	235	242.9	216	242	271	242	339	319	334	330.5		1.01	1	1	0.9927	0	0	0		1.4	0.0364	0	0	0
232368_at	BET3L	221300	BET3 like (S. cerevisiae)	12	12	12	11.9	13	13	11	12.4	13	14	13	13.2	17	15	18	16.4		1.04	1	1.1	0.8372	0	0	0		1.4	0.0672	0	0	0
228354_at	C10orf83	118812	chromosome 10 open reading frame 83	41	40	48	42.8	45	32	49	41.4	52	43	50	48.1	62	52	63	58.9		-1.03	1	1.1	0.9011	0	0	0		1.4	0.1719	0	0	0
202518_at	BCL7B	9275	B-cell CLL/lymphoma 7B	107	125	120	116.9	110	109	121	112.9	133	139	138	136.8	161	146	176	160.8		-1.04	1	1.2	0.7464	0	0	0		1.4	0.1386	0	0	0
227637_at	TFCP2	7024	Transcription factor CP2	85	89	86	86.7	84	73	94	83.2	92	91	86	89.6	94	127	142	119.3		-1.04	1	1	0.9138	0	0	0		1.4	0.3379	0	0	0
230326_s_at	HSPC138	51501	hypothetical protein HSPC138	491	510	524	508.2	543	495	533	523.2	586	572	564	573.9	765	653	683	698.9		1.03	1	1.1	0.5265	0	0	0		1.4	0.0778	0	0	0
213394_at	MAPKBP1	23005	mitogen activated protein kinase binding protein 1	62	69	69	66.6	78	83	79	80	65	68	86	72.4	97	85	93	91.6		1.2	1	1.1	0.9451	0	0	0		1.4	0.0795	0	0	0
219349_s_at	SEC5L1	55770	SEC5-like 1 (S. cerevisiae)	39	46	45	43.4	47	37	48	43.7	39	43	47	42.8	54	61	64	59.6		1.01	1	-1	0.9899	0	0	0		1.4	0.1443	0	0	0
202540_s_at	HMGCR	3156	3-hydroxy-3-methylglutaryl-Coenzyme A reductase	161	164	171	165.3	164	151	176	163.2	169	181	196	181.4	211	230	242	227.3		-1.01	1	1.1	0.8636	0	0	0		1.4	0.0624	0	0	0
200713_s_at	MAPRE1	22919	microtubule-associated protein, RP/EB family, member 1	1347	1400	1400	1382.3	1316	1348	1340	1334.7	1529	1348	1374	1414.9	2062	1833	1818	1900.7		-1.04	1	1	0.9676	0	0	0		1.4	0.0579	0	0	0
238342_at	KIAA0220	283846	PI-3-kinase-related kinase SMG-1-like	15	13	13	13.7	14	12	11	12.4	15	13	16	14.4	16	19	22	18.8		-1.1	1	1.1	0.9683	0	0	0		1.4	0.2695	0	0	0
201159_s_at	NMT1	4836	N-myristoyltransferase 1	42	50	47	46.3	39	53	50	47	46	51	51	49.3	68	58	65	63.7		1.01	1	1.1	0.9365	0	0	0		1.4	0.1265	0	0	0
225753_at	ZNF513	130557	zinc finger protein 513	45	65	56	55	50	51	54	51.3	44	56	64	54.3	64	77	87	75.6		-1.07	1	-1	0.9932	0	0	0		1.4	0.3753	0	0	0
210203_at	CNOT4	4850	CCR4-NOT transcription complex, subunit 4	14	13	13	13.2	14	15	14	14.4	13	15	14	13.9	16	17	22	18.1		1.09	1	1.1	0.9421	0	0	0		1.4	0.2644	0	0	0
233557_s_at	MON1B	22879	MON1 homolog B (yeast)	117	137	128	127.1	127	115	124	121.9	139	128	139	135.4	159	171	196	174.6		-1.04	1	1.1	0.9229	0	0	0		1.4	0.1572	0	0	0
225766_s_at	TNPO1	3842	Transportin 1	456	415	404	424.6	412	388	396	398.8	334	415	401	381.7	483	640	643	583.5		-1.06	1	-1.1	0.904	0	0	0		1.4	0.2496	0	0	0
219831_at	CDKL3	51265	cyclin-dependent kinase-like 3	35	42	39	38.6	42	38	42	40.7	43	40	37	39.8	45	71	46	53		1.06	1	1	0.9723	0	0	0		1.4	0.4389	0	0	0
226607_at	C20orf194	25943	chromosome 20 open reading frame 194	64	67	69	66.6	76	46	66	61.3	57	69	75	66.6	76	96	106	91.5		-1.09	1	-1	0.9993	0	0	0		1.4	0.2526	0	0	0
243861_at	KIAA1961	96459	KIAA1961 gene	13	13	14	13.3	15	10	16	13.3	15	15	13	14.1	14	18	24	18.2		1.01	1	1.1	0.9388	0	0	0		1.4	0.4058	0	0	0
1556114_a_at	DKFZp451A211	400169	DKFZp451A211 protein	30	29	28	29	26	29	24	26.6	32	30	30	30.7	37	38	44	39.8		-1.09	1	1.1	0.8662	0	0	0		1.4	0.11	0	0	0
214940_s_at	C17orf31	23293	chromosome 17 open reading frame 31	46	47	42	44.8	46	58	52	51.9	39	43	51	44.2	70	58	57	61.6		1.16	1	-1	0.9899	0	0	0		1.4	0.1483	0	0	0
206636_at	RASA2	5922	RAS p21 protein activator 2	48	50	53	50.2	55	48	66	55.9	48	56	57	53.8	57	68	84	68.9		1.11	1	1.1	0.9222	0	0	0		1.4	0.3037	0	0	0
1553354_a_at	LOC399789	399789	hypothetical gene supported by AK056520; NM_153030	33	29	28	30.2	36	29	31	31.7	39	30	27	31.7	33	43	49	41.4		1.05	1	1	0.977	0	0	0		1.4	0.3378	0	0	0
204894_s_at	AOC3	8639	amine oxidase, copper containing 3 (vascular adhesion protein 1)	18	18	22	19.4	16	19	18	17.9	18	18	19	18.2	27	26	27	26.6		-1.08	1	-1.1	0.9556	0	0	0		1.4	0.1571	0	0	0
205827_at	CCK	885	cholecystokinin	27	28	29	27.8	28	30	26	27.9	28	29	34	30	52	30	36	38.2		1	1	1.1	0.9217	0	0	0		1.4	0.4502	0	0	0
215248_at	GRB10	2887	growth factor receptor-bound protein 10	28	29	31	29	33	27	30	30.1	31	30	31	30.8	36	40	44	39.9		1.04	1	1.1	0.8835	0	0	0		1.4	0.1219	0	0	0
209038_s_at	EHD1	10938	EH-domain containing 1	43	42	43	42.8	43	44	44	43.9	44	41	43	42.6	60	50	67	58.7		1.03	1	-1	0.9899	0	0	0		1.4	0.2064	0	0	0
202322_s_at	GGPS1	9453	geranylgeranyl diphosphate synthase 1	238	262	250	249.7	233	238	261	243.8	264	243	249	251.9	362	332	335	342.7		-1.02	1	1	0.9859	0	0	0		1.4	0.0479	0	0	0
206825_at	OXTR	5021	oxytocin receptor	31	30	34	31.4	30	34	30	31.3	31	29	29	29.6	41	41	47	43.1		-1	1	-1.1	0.9028	0	0	0		1.4	0.09	0	0	0
227220_at	NFXL1	152518	nuclear transcription factor, X-box binding-like 1	50	48	61	52.5	60	28	51	44.3	74	68	71	71.2	50	82	90	72.1		-1.19	1	1.4	0.6767	0	0	0		1.4	0.55	0	0	0
202154_x_at	TUBB3	10381	tubulin, beta 3	1081	1168	1092	1113.3	1124	1078	1137	1112.5	1035	1160	1255	1146.4	1426	1540	1623	1527.6		-1	1	1	0.9708	0	0	0		1.4	0.0638	0	0	0
218310_at	RABGEF1	27342	RAB guanine nucleotide exchange factor (GEF) 1	95	102	103	100.2	100	84	114	98.3	90	98	111	99.3	118	152	145	137.5		-1.02	1	-1	0.9916	0	0	0		1.4	0.1743	0	0	0
203460_s_at	PSEN1	5663	presenilin 1 (Alzheimer disease 3)	274	300	290	287.9	296	209	305	266	248	286	296	275.9	384	385	416	394.9		-1.08	1	-1	0.9604	0	0	0		1.4	0.0461	0	0	0
209341_s_at	IKBKB	3551	inhibitor of kappa light polypeptide gene enhancer in B-cells, kinase beta	119	115	123	119.1	117	89	126	109.5	91	114	114	106	139	169	186	163.4		-1.09	1	-1.1	0.9013	0	0	0		1.4	0.2046	0	0	0
203743_s_at	TDG	6996	thymine-DNA glycosylase	357	376	372	368.7	370	338	401	368.7	366	407	431	400.5	456	535	530	505.7		1	1	1.1	0.8915	0	0	0		1.4	0.089	0	0	0
202539_s_at	HMGCR	3156	3-hydroxy-3-methylglutaryl-Coenzyme A reductase	154	185	171	169.3	161	147	197	167	189	196	175	186.1	193	253	257	232.2		-1.01	1	1.1	0.9028	0	0	0		1.4	0.2776	0	0	0
209692_at	EYA2	2139	eyes absent homolog 2 (Drosophila)	28	27	24	26.3	27	29	32	29.1	27	26	30	27.5	40	33	35	36.1		1.11	1	1	0.9613	0	0	0		1.4	0.1421	0	0	0
205583_s_at	CXorf45	79868	chromosome X open reading frame 45	63	60	55	59.3	61	39	72	55.5	58	68	64	63	63	95	89	81.3		-1.07	1	1.1	0.9298	0	0	0		1.4	0.3593	0	0	0
1564155_x_at				32	30	29	30.3	34	33	34	33.4	36	36	37	36.1	46	41	38	41.6		1.1	1	1.2	0.5352	0	0	0		1.4	0.1109	0	0	0
225422_at	CDC26	246184	cell division cycle 26	325	338	352	338	299	300	351	315.6	306	346	337	329.2	470	470	451	463.4		-1.07	1	-1	0.9657	0	0	0		1.4	0.0231	0	0	0
206307_s_at	FOXD1	2297	forkhead box D1	80	75	88	80.6	89	68	89	81.2	136	154	143	144	98	111	125	110.4		1.01	1	1.8	0.3138	0	0	0		1.4	0.187	0	0	0
222666_s_at	RCL1	10171	RNA terminal phosphate cyclase-like 1	110	114	126	116.4	117	116	110	114.4	103	111	124	112.2	150	159	171	159.5		-1.02	1	-1	0.9676	0	0	0		1.4	0.0903	0	0	0
227014_at	LOC57168	57168	similar to aspartate beta hydroxylase (ASPH)	21	21	22	21.2	25	23	27	25.2	25	29	24	25.9	23	32	32	29		1.19	1	1.2	0.7181	0	0	0		1.4	0.2811	0	0	0
212643_at	C14orf32	93487	chromosome 14 open reading frame 32	1312	1434	1442	1394.7	1293	1295	1385	1323.9	1399	1396	1364	1386.1	2031	1961	1751	1910.6		-1.05	1	-1	0.9882	0	0	0		1.4	0.09	0	0	0
220686_s_at	PIWIL2	55124	piwi-like 2 (Drosophila)	25	30	30	28.2	30	34	34	32.8	33	31	28	30.4	45	38	34	38.7		1.16	1	1.1	0.9391	0	0	0		1.4	0.2781	0	0	0
219171_s_at	ZNF236	7776	zinc finger protein 236	17	18	18	17.9	19	13	19	16.5	21	18	18	18.9	18	32	26	24.5		-1.09	1	1.1	0.9361	0	0	0		1.4	0.5028	0	0	0
203463_s_at	EPN2	22905	epsin 2	43	54	50	48.9	49	54	49	50.8	42	45	50	45.4	78	60	65	66.9		1.04	1	-1.1	0.9471	0	0	0		1.4	0.2605	0	0	0
202899_s_at	SFRS3	6428	splicing factor, arginine/serine-rich 3	1387	1361	1396	1381.1	1243	1414	1418	1356.2	1416	1435	1402	1417.3	1817	1887	1973	1891.3		-1.02	1	1	0.811	0	0	0		1.4	0.0213	0	0	0
227475_at	FOXQ1	94234	forkhead box Q1	102	124	109	111.6	111	91	107	102.7	110	115	118	114.2	153	150	155	152.7		-1.09	1	1	0.9774	0	0	0		1.4	0.1027	0	0	0
242335_at	SLC25A37	51312	solute carrier family 25, member 37	49	44	38	43.4	45	29	42	38.1	38	47	42	42.2	42	69	73	59.5		-1.14	1	-1	0.9805	0	0	0		1.4	0.5349	0	0	0
219399_at	LIN7C	55327	lin-7 homolog C (C. elegans)	82	78	76	78.4	76	63	79	72.5	74	75	79	76.1	87	115	123	107.3		-1.08	1	-1	0.9373	0	0	0		1.4	0.28	0	0	0
230031_at	HSPA5	3309	heat shock 70kDa protein 5 (glucose-regulated protein, 78kDa)	73	85	73	76.5	81	65	80	75.1	76	89	83	82.7	108	98	109	104.7		-1.02	1	1.1	0.9241	0	0	0		1.4	0.1096	0	0	0
233728_at	FLJ12671	81875	Interferon stimulated exonuclease gene 20kDa-like 2	26	26	28	26.6	27	26	24	25.6	28	24	33	28.1	37	39	34	36.4		-1.04	1	1.1	0.9642	0	0	0		1.4	0.0634	0	0	0
203330_s_at	STX5A	6811	syntaxin 5A	50	60	52	54	63	48	64	57.9	52	50	59	53.3	72	69	82	74		1.07	1	-1	0.9893	0	0	0		1.4	0.1678	0	0	0
226082_s_at	SFRS15	57466	splicing factor, arginine/serine-rich 15	112	140	126	125.6	125	130	136	129.8	122	128	130	126.3	180	166	170	171.9		1.03	1	1	0.994	0	0	0		1.4	0.1327	0	0	0
202324_s_at	ACBD3	64746	acyl-Coenzyme A binding domain containing 3	325	327	350	333.7	335	299	340	324.1	268	320	305	296.9	452	447	471	456.5		-1.03	1	-1.1	0.8613	0	0	0		1.4	0.0268	0	0	0
210260_s_at	TNFAIP8	25816	tumor necrosis factor, alpha-induced protein 8	218	195	202	204.9	195	161	204	185.6	185	210	211	201.5	226	305	320	280.2		-1.1	1	-1	0.9814	0	0	0		1.4	0.3071	0	0	0
210139_s_at	PMP22	5376	peripheral myelin protein 22	523	556	569	549.4	497	494	585	523.4	540	526	528	531.4	758	699	800	751.4		-1.05	1	-1	0.9163	0	0	0		1.4	0.0693	0	0	0
224309_s_at	SUGT1	10910	SGT1, suppressor of G2 allele of SKP1 (S. cerevisiae)	363	355	402	372.7	378	346	381	368	434	431	420	428.3	524	533	474	509.7		-1.01	1	1.1	0.7145	0	0	0		1.4	0.0879	0	0	0
224413_s_at	TM2D2	83877	TM2 domain containing 2 /// TM2 domain containing 2	362	448	440	414.9	418	387	422	408.8	418	425	433	425.4	535	601	568	567.3		-1.01	1	1	0.9789	0	0	0		1.4	0.1598	0	0	0
1553691_at	B3GALNT2	148789	UDP-GalNAc:betaGlcNAc beta 1,3-galactosaminyltransferase, polypeptide 2	19	19	17	18.1	19	17	18	18.1	17	20	20	18.8	19	27	29	24.8		-1	1	1	0.97	0	0	0		1.4	0.3743	0	0	0
1558041_a_at	LOC283849	283849	hypothetical protein LOC283849	24	22	26	24.1	28	23	25	25.1	27	28	30	28.3	25	32	44	33		1.04	1	1.2	0.7714	0	0	0		1.4	0.4739	0	0	0
230494_at				52	52	60	54.6	56	40	63	52.1	52	51	55	52.7	52	77	104	74.6		-1.05	1	-1	0.9624	0	0	0		1.4	0.5807	0	0	0
223370_at	PLEKHA3	65977	pleckstrin homology domain containing, family A (phosphoinositide binding specific) member 3	155	149	183	161.2	152	128	161	146.2	173	177	164	171	190	240	234	220.3		-1.1	1	1.1	0.9477	0	0	0		1.4	0.241	0	0	0
202131_s_at	RIOK3	8780	RIO kinase 3 (yeast) /// RIO kinase 3 (yeast)	67	64	62	64.2	63	53	67	60.8	59	63	61	60.8	60	103	109	87.7		-1.06	1	-1.1	0.8772	0	0	0		1.4	0.5429	0	0	0
1552519_at	ACVR1C	130399	activin A receptor, type IC	15	13	16	14.4	13	12	13	12.7	14	15	14	14.1	21	19	19	19.7		-1.13	1	-1	0.9784	0	0	0		1.4	0.1388	0	0	0
226291_at	ALS2	57679	amyotrophic lateral sclerosis 2 (juvenile)	103	107	107	105.7	105	87	115	101.6	103	99	110	103.9	126	155	154	144.4		-1.04	1	-1	0.9688	0	0	0		1.4	0.1391	0	0	0
228661_s_at			CDNA FLJ11489 fis, clone HEMBA1001915	41	39	36	38.7	42	26	41	35.7	36	46	41	40.7	38	63	62	52.9		-1.08	1	1.1	0.966	0	0	0		1.4	0.4985	0	0	0
201174_s_at	TERF2IP	54386	telomeric repeat binding factor 2, interacting protein	139	152	162	150.6	161	151	158	156.7	153	162	164	159.9	177	218	225	205.6		1.04	1	1.1	0.919	0	0	0		1.4	0.2095	0	0	0
1552648_a_at	TNFRSF10A	8797	tumor necrosis factor receptor superfamily, member 10a	86	84	81	83.5	80	87	87	84.6	66	89	87	79.6	113	104	127	114		1.01	1	-1	0.9708	0	0	0		1.4	0.1116	0	0	0
204028_s_at	RABGAP1	23637	RAB GTPase activating protein 1	157	178	178	170.8	170	161	167	165.8	183	173	181	179	252	207	243	233.1		-1.03	1	1	0.9335	0	0	0		1.4	0.1491	0	0	0
225252_at	SRXN1	140809	sulfiredoxin 1 homolog (S. cerevisiae)	1230	1211	1222	1220.9	1069	1151	1219	1144.9	1012	1035	1100	1048.1	1619	1666	1714	1666.1		-1.07	1	-1.2	0.496	0	0	0		1.4	0.0113	0	0	0
226210_s_at	MEG3	55384	maternally expressed 3	17	15	18	16.7	17	20	17	18	17	16	18	16.9	24	21	23	22.8		1.07	1	1	0.9897	0	0	0		1.4	0.1295	0	0	0
227284_at	LOC90321	90321	hypothetical protein LOC90321	125	134	130	129.5	126	105	143	123.6	150	150	145	148.5	171	186	173	176.6		-1.05	1	1.1	0.4985	0	0	0		1.4	0.0355	0	0	0
202644_s_at	TNFAIP3	7128	tumor necrosis factor, alpha-induced protein 3	40	43	45	42.9	41	30	41	36.8	53	53	51	52.5	50	64	62	58.5		-1.17	1	1.2	0.5352	0	0	0		1.4	0.1861	0	0	0
231188_at	ZSCAN2	54993	zinc finger and SCAN domain containing 2	52	65	58	58.1	62	55	63	59.8	63	61	57	60.3	85	81	72	79.2		1.03	1	1	0.9683	0	0	0		1.4	0.1871	0	0	0
207936_x_at	RFPL3	10738	ret finger protein-like 3	31	31	32	31.2	30	22	22	24.1	25	35	29	29.4	40	48	40	42.6		-1.3	1	-1.1	0.9622	0	0	0		1.4	0.1034	0	0	0
219540_at	ZNF267	10308	zinc finger protein 267	89	81	78	82.5	87	48	85	70.9	85	105	98	95.8	84	125	136	112.6		-1.16	1	1.2	0.8544	0	0	0		1.4	0.4472	0	0	0
242808_at				20	18	20	19.2	21	17	18	18.6	17	21	19	19	27	27	25	26.1		-1.03	1	-1	0.9896	0	0	0		1.4	0.0593	0	0	0
221335_x_at	FLJ12886	56006	hypothetical protein FLJ12886	62	66	72	66.2	72	64	64	66.5	64	74	77	71.6	94	85	92	90.3		1	1	1.1	0.9332	0	0	0		1.4	0.0911	0	0	0
203828_s_at	IL32	9235	interleukin 32 /// interleukin 32	31	40	32	34.2	32	52	32	37.4	29	32	37	32.4	55	39	47	46.7		1.09	1	-1.1	0.9695	0	0	0		1.4	0.3639	0	0	0
213470_s_at	HNRPH1	3187	heterogeneous nuclear ribonucleoprotein H1 (H)	56	56	59	56.8	47	46	57	49.9	56	59	55	56.8	61	83	92	77.4		-1.14	1	-1	0.9993	0	0	0		1.4	0.3547	0	0	0
214276_at	KLF12	11278	Kruppel-like factor 12	32	32	37	33.4	35	28	33	31.8	31	36	34	33.5	46	50	41	45.6		-1.05	1	1	0.9968	0	0	0		1.4	0.1589	0	0	0
220500_s_at	RABL2B /// RABL2A	11158 /// 11159	RAB, member of RAS oncogene family-like 2B /// RAB, member of RAS oncogene family-like 2A	44	55	42	46.9	44	49	51	47.8	47	42	44	44	64	63	65	63.9		1.02	1	-1.1	0.9607	0	0	0		1.4	0.2021	0	0	0
225267_at	KPNA4	3840	karyopherin alpha 4 (importin alpha 3)	273	283	272	275.9	251	247	288	261.3	223	268	267	251.6	299	436	408	376		-1.06	1	-1.1	0.9033	0	0	0		1.4	0.3244	0	0	0
204682_at	LTBP2	4053	latent transforming growth factor beta binding protein 2	51	47	53	50.3	62	44	49	51	51	43	46	46.5	67	68	71	68.5		1.01	1	-1.1	0.9199	0	0	0		1.4	0.0534	0	0	0
203239_s_at	CNOT3	4849	CCR4-NOT transcription complex, subunit 3	69	92	81	79.9	89	83	91	87.4	90	86	80	85.4	91	112	127	108.9		1.09	1	1.1	0.9572	0	0	0		1.4	0.3593	0	0	0
222982_x_at	SLC38A2	54407	solute carrier family 38, member 2	2243	2144	2284	2222.9	2487	2377	2439	2434	2842	2881	2730	2817.3	3062	2973	3053	3028.9		1.09	1	1.3	0.3348	0	0	0		1.4	0.0165	0	0	0
218336_at	PFDN2	5202	prefoldin 2	434	455	445	444.5	454	418	460	443.5	420	443	432	431.5	622	587	609	605.7		-1	1	-1	0.904	0	0	0		1.4	0.0172	0	0	0
225630_at	KIAA1706	80820	KIAA1706 protein	65	72	72	69.7	61	67	63	63.8	63	72	71	68.7	93	102	90	95		-1.09	1	-1	0.9842	0	0	0		1.4	0.0862	0	0	0
223476_s_at	FLJ38663	91574	hypothetical protein FLJ38663	67	75	75	72.1	63	78	82	74	79	80	81	80.1	99	99	97	98.2		1.03	1	1.1	0.791	0	0	0		1.4	0.0479	0	0	0
203644_s_at	MON1B	22879	MON1 homolog B (yeast)	78	78	79	78.4	68	77	76	73.8	80	79	88	82.3	96	108	118	106.8		-1.06	1	1	0.9017	0	0	0		1.4	0.1057	0	0	0
200064_at	HSPCB	3326	heat shock 90kDa protein 1, beta /// heat shock 90kDa protein 1, beta	2858	2888	2955	2900.3	2928	2886	2895	2903.1	3145	3150	3251	3181.4	3960	3999	3896	3951.2		1	1	1.1	0.476	0	0	0		1.4	0.0061	0	0	0
213134_x_at	BTG3	10950	BTG family, member 3	450	431	463	447.9	445	401	426	423.8	492	464	469	474.7	629	644	561	610.2		-1.06	1	1.1	0.8544	0	0	0		1.4	0.0739	0	0	0
222514_at	RRAGC	64121	Ras-related GTP binding C	124	133	126	127.3	110	104	116	110	114	114	105	110.8	176	165	179	173.4		-1.16	1	-1.1	0.6831	0	0	0		1.4	0.0373	0	0	0
238568_s_at	C18orf8	29919	Chromosome 18 open reading frame 8	25	25	25	25.2	22	24	23	22.8	25	24	21	23.6	35	32	36	34.3		-1.11	1	-1.1	0.9101	0	0	0		1.4	0.0426	0	0	0
213478_at	KIAA1026	23254	kazrin	82	102	104	95.8	93	95	111	99.2	109	106	127	113.8	127	127	138	130.4		1.04	1	1.2	0.8716	0	0	0		1.4	0.1793	0	0	0
229678_at			MRNA; cDNA DKFZp762K056 (from clone DKFZp762K056)	105	104	114	107.6	92	98	121	102.8	106	111	110	109.1	128	157	156	146.6		-1.05	1	1	0.9766	0	0	0		1.4	0.1495	0	0	0
222128_at	NSUN6	221078	NOL1/NOP2/Sun domain family, member 6	38	31	34	34.4	36	27	32	31.5	32	32	33	32.4	40	45	57	46.8		-1.09	1	-1.1	0.9361	0	0	0		1.4	0.3285	0	0	0
200898_s_at	MGEA5	10724	meningioma expressed antigen 5 (hyaluronidase)	151	170	157	158.9	157	152	164	157.4	143	159	160	153.7	209	225	215	216.4		-1.01	1	-1	0.9622	0	0	0		1.4	0.0593	0	0	0
219092_s_at	IPPK	64768	inositol 1,3,4,5,6-pentakisphosphate 2-kinase	47	52	56	51.6	48	49	60	51.9	56	53	60	56.3	72	72	67	70.3		1	1	1.1	0.9067	0	0	0		1.4	0.1022	0	0	0
212985_at	APBB2	323	Amyloid beta (A4) precursor protein-binding, family B, member 2 (Fe65-like)	45	55	45	48.1	44	37	48	42.8	50	54	43	49	49	81	71	65.5		-1.13	1	1	0.989	0	0	0		1.4	0.4817	0	0	0
219093_at	FLJ20701	55022	hypothetical protein FLJ20701 /// hypothetical protein FLJ20701	22	22	23	22.3	23	23	22	22.5	22	25	19	21.9	25	31	35	30.3		1.01	1	-1	0.9855	0	0	0		1.4	0.2443	0	0	0
207002_s_at	PLAGL1	5325	pleiomorphic adenoma gene-like 1	85	71	80	78.5	87	48	89	72	98	107	115	106.3	75	129	126	106.8		-1.09	1	1.4	0.5991	0	0	0		1.4	0.5297	0	0	0
202721_s_at	GFPT1	2673	glutamine-fructose-6-phosphate transaminase 1	169	195	170	177.5	179	157	179	171.2	183	180	169	177.5	248	231	245	241.5		-1.04	1	1	0.9993	0	0	0		1.4	0.0862	0	0	0
209615_s_at	PAK1	5058	p21/Cdc42/Rac1-activated kinase 1 (STE20 homolog, yeast)	22	28	26	25.2	22	29	33	27.3	19	26	26	23.6	29	32	44	34.3		1.08	1	-1.1	0.9692	0	0	0		1.4	0.4359	0	0	0
222162_s_at	ADAMTS1	9510	ADAM metallopeptidase with thrombospondin type 1 motif, 1	23	21	23	22.2	27	24	26	25.6	24	25	24	24.1	32	29	30	30.2		1.15	1	1.1	0.8178	0	0	0		1.4	0.0713	0	0	0
227469_at	PTEN	5728	Phosphatase and tensin homolog (mutated in multiple advanced cancers 1)	51	39	45	44.6	53	68	48	56	40	50	46	45	78	52	56	60.7		1.26	1	1	0.994	0	0	0		1.4	0.4156	0	0	0
242139_s_at	LOC113386	113386	similar to envelope protein	74	84	87	81.3	74	67	85	75.1	82	84	86	84.1	126	108	99	110.6		-1.08	1	1	0.9599	0	0	0		1.4	0.1948	0	0	0
206380_s_at	PFC	5199	properdin P factor, complement	25	27	27	26.3	22	29	25	25.1	28	27	28	27.6	40	32	36	35.8		-1.05	1	1.1	0.8355	0	0	0		1.4	0.1408	0	0	0
203188_at	B3GNT6	11041	UDP-GlcNAc:betaGal beta-1,3-N-acetylglucosaminyltransferase 6	171	206	177	184.1	210	189	213	203.6	161	149	164	157.9	248	249	255	250.4		1.11	1	-1.2	0.8318	0	0	0		1.4	0.1059	0	0	0
202176_at	ERCC3	2071	excision repair cross-complementing rodent repair deficiency, complementation group 3 (xeroderma pigmentosum group B complementing)	115	118	121	118	121	103	123	115.1	94	110	115	105.9	156	167	159	160.5		-1.03	1	-1.1	0.8898	0	0	0		1.4	0.0235	0	0	0
210761_s_at	GRB7	2886	growth factor receptor-bound protein 7	82	102	88	90.2	101	90	96	95.5	113	100	102	104.6	126	113	130	122.6		1.06	1	1.2	0.8619	0	0	0		1.4	0.1697	0	0	0
238080_at	Beta4GalNAc-T4	338707	beta1,4-N-acetylgalactosaminyltransferases IV	21	28	26	25	28	43	31	33.3	35	28	28	30.5	38	30	34	34		1.33	1	1.2	0.8772	0	0	0		1.4	0.3019	0	0	0
202733_at	P4HA2	8974	procollagen-proline, 2-oxoglutarate 4-dioxygenase (proline 4-hydroxylase), alpha polypeptide II	321	386	380	361.1	367	356	391	370.9	472	434	425	443.3	446	497	534	491		1.03	1	1.2	0.7714	0	0	0		1.4	0.1782	0	0	0
212475_at	KIAA0241	23080	KIAA0241 protein	54	57	60	57	54	49	51	51.4	57	56	66	59.5	67	80	87	77.5		-1.11	1	1	0.9614	0	0	0		1.4	0.1899	0	0	0
225263_at	HS6ST1	9394	heparan sulfate 6-O-sulfotransferase 1	89	87	85	87.1	97	76	83	85.1	85	92	91	89.3	106	124	127	118.4		-1.02	1	1	0.9451	0	0	0		1.4	0.1099	0	0	0
208687_x_at	HSPA8	3312	heat shock 70kDa protein 8	4107	4118	3957	4060	3785	3784	4076	3879.2	5119	4752	4874	4912.8	5688	5528	5350	5520		-1.05	1	1.2	0.4316	0	0	0		1.4	0.0175	0	0	0
204928_s_at	SLC10A3	8273	solute carrier family 10 (sodium/bile acid cotransporter family), member 3	103	119	128	116.1	112	125	125	120.7	111	113	123	115.8	151	161	162	157.9		1.04	1	-1	0.9979	0	0	0		1.4	0.133	0	0	0
223330_s_at	SUGT1	10910	SGT1, suppressor of G2 allele of SKP1 (S. cerevisiae)	78	78	81	79.3	76	48	69	63.1	77	91	85	84	89	122	114	107.8		-1.26	1	1.1	0.9256	0	0	0		1.4	0.2448	0	0	0
203556_at	ZHX2	22882	zinc fingers and homeoboxes 2	56	71	76	67.2	73	51	74	65.3	71	85	77	77.5	73	103	102	91.3		-1.03	1	1.2	0.9102	0	0	0		1.4	0.4284	0	0	0
222654_at	IMPAD1	54928	inositol monophosphatase domain containing 1	236	242	243	240.4	235	209	245	229.3	206	254	231	229.4	275	363	350	326.7		-1.05	1	-1	0.9556	0	0	0		1.4	0.2125	0	0	0
218104_at	TEX10	54881	testis expressed sequence 10	193	204	209	201.9	186	174	215	190.9	173	201	197	189.8	249	294	282	274.3		-1.06	1	-1.1	0.9234	0	0	0		1.4	0.0974	0	0	0
226506_at	FLJ13710	79875	hypothetical protein FLJ13710	108	116	114	112.8	115	92	117	107.2	112	102	114	109.5	145	159	156	153.3		-1.05	1	-1	0.9581	0	0	0		1.4	0.045	0	0	0
220174_at	LRRC8E	80131	leucine rich repeat containing 8 family, member E	37	42	51	43	44	37	42	41	35	34	41	36.7	51	64	61	58.4		-1.05	1	-1.2	0.904	0	0	0		1.4	0.3288	0	0	0
218791_s_at	C15orf29	79768	chromosome 15 open reading frame 29	86	83	86	84.8	83	52	88	72.7	103	124	93	106	103	126	118	115.2		-1.17	1	1.3	0.8028	0	0	0		1.4	0.1126	0	0	0
229797_at	MCOLN3	55283	mucolipin 3	58	61	56	58.1	60	48	62	56.3	58	63	56	58.7	62	83	94	78.9		-1.03	1	1	0.9859	0	0	0		1.4	0.3544	0	0	0
205294_at	BAIAP2	10458	BAI1-associated protein 2	32	33	38	34.3	36	35	34	34.9	36	34	36	35.5	43	51	47	46.5		1.02	1	1	0.9676	0	0	0		1.4	0.1683	0	0	0
218378_s_at	PRKRIP1	79706	PRKR interacting protein 1 (IL11 inducible)	87	97	106	96.2	82	91	103	91.7	99	97	97	97.7	138	131	123	130.6		-1.05	1	1	0.9842	0	0	0		1.4	0.1347	0	0	0
204841_s_at	EEA1	8411	Early endosome antigen 1, 162kD	16	14	16	15.4	16	16	15	15.7	16	16	14	15.2	22	20	21	21		1.02	1	-1	0.9859	0	0	0		1.4	0.0995	0	0	0
213230_at	HUMPPA	30850	paraneoplastic antigen	130	162	153	147.6	150	137	150	145.6	154	152	145	150.3	194	203	204	200.4		-1.01	1	1	0.9842	0	0	0		1.4	0.1387	0	0	0
227768_at	ZNF407	55628	zinc finger protein 407	73	83	86	80.3	78	56	82	71	69	80	73	73.9	98	114	115	109		-1.13	1	-1.1	0.9138	0	0	0		1.4	0.1423	0	0	0
240190_at			Transcribed locus	17	20	18	18.3	19	24	17	19.7	20	22	18	20.2	25	25	24	24.8		1.08	1	1.1	0.9098	0	0	0		1.4	0.096	0	0	0
221679_s_at	ABHD6	57406	abhydrolase domain containing 6	29	32	30	30.2	29	27	29	28.3	27	27	34	28.9	35	43	45	40.9		-1.06	1	-1	0.9733	0	0	0		1.4	0.1962	0	0	0
234561_at	SLC2A13	114134	solute carrier family 2 (facilitated glucose transporter), member 13	18	17	16	17	20	23	17	19.8	21	18	17	19	30	19	22	23.1		1.16	1	1.1	0.9028	0	0	0		1.4	0.3975	0	0	0
220657_at	KLHL11	55175	kelch-like 11 (Drosophila)	20	20	21	20.2	20	41	24	27	17	23	19	19.5	33	25	25	27.4		1.33	1	-1	0.9749	0	0	0		1.4	0.259	0	0	0
213164_at	SLC5A3	6526	solute carrier family 5 (inositol transporters), member 3	179	147	168	164.2	181	123	196	163.3	264	261	242	255.5	198	233	240	222.9		-1.01	1	1.6	0.4528	0	0	0		1.4	0.1964	0	0	0
209191_at	TUBB6	84617	tubulin, beta 6	625	699	682	667.7	580	617	640	612	696	669	698	687.7	897	881	943	906.4		-1.09	1	1	0.954	0	0	0		1.4	0.0546	0	0	0
211771_s_at	POU2F2	5452	POU domain, class 2, transcription factor 2 /// POU domain, class 2, transcription factor 2	24	25	24	24.5	21	36	27	27.2	25	20	26	23.6	45	27	31	33.2		1.11	1	-1	0.9738	0	0	0		1.4	0.457	0	0	0
209743_s_at	ITCH	83737	itchy homolog E3 ubiquitin protein ligase (mouse)	45	45	45	44.8	46	30	49	40.7	41	40	41	40.7	52	60	72	60.8		-1.1	1	-1.1	0.2797	0	0	0		1.4	0.2484	0	0	0
202497_x_at	SLC2A3	6515	solute carrier family 2 (facilitated glucose transporter), member 3	98	113	111	107.3	97	104	108	102.8	141	129	122	130.3	151	136	150	145.5		-1.04	1	1.2	0.7507	0	0	0		1.4	0.0966	0	0	0
212696_s_at	RNF4	6047	ring finger protein 4	414	405	445	421	417	388	451	417.7	464	480	514	485.6	558	592	564	571.3		-1.01	1	1.2	0.7181	0	0	0		1.4	0.0395	0	0	0
230342_at	FOXK1	221937	forkhead box K1	20	26	25	23.4	26	28	23	25.4	20	28	20	22.3	36	27	33	31.7		1.09	1	-1	0.9788	0	0	0		1.4	0.3271	0	0	0
211960_s_at	RAB7	7879	RAB7, member RAS oncogene family	253	221	270	247.3	257	191	256	232.6	217	275	291	259.2	247	387	395	335.5		-1.06	1	1	0.9754	0	0	0		1.4	0.4819	0	0	0
208875_s_at	PAK2	5062	p21 (CDKN1A)-activated kinase 2	86	103	113	100.1	100	83	110	96.9	93	103	110	101.6	121	137	151	135.8		-1.03	1	1	0.9899	0	0	0		1.4	0.2636	0	0	0
221646_s_at	ZDHHC11	79844	zinc finger, DHHC-type containing 11	50	57	55	54	51	51	61	54.2	43	51	54	49.1	58	77	88	73.3		1	1	-1.1	0.9232	0	0	0		1.4	0.3635	0	0	0
212271_at	MAPK1	5594	mitogen-activated protein kinase 1	186	187	190	187.7	177	161	194	177	158	182	180	173	227	253	288	254.6		-1.06	1	-1.1	0.8796	0	0	0		1.4	0.1433	0	0	0
228172_at			CDNA clone IMAGE:4811557	36	34	38	35.7	36	47	31	37.1	34	37	37	36.2	61	44	42	48.4		1.04	1	1	0.9796	0	0	0		1.4	0.3377	0	0	0
215672_s_at	KIAA0828	23382	KIAA0828 protein	34	31	33	32.4	32	47	37	37.9	31	34	32	32.4	47	43	42	44		1.17	1	-1	0.9975	0	0	0		1.4	0.0574	0	0	0
218265_at	SECISBP2	79048	SECIS binding protein 2	92	84	93	89.5	93	73	85	83.5	82	94	90	88.3	98	133	137	121.4		-1.07	1	-1	0.9845	0	0	0		1.4	0.3103	0	0	0
215696_s_at	KIAA0310	9919	KIAA0310	229	243	238	236.4	233	210	245	228.9	209	225	244	225.6	281	324	362	320.6		-1.03	1	-1	0.9381	0	0	0		1.4	0.1671	0	0	0
1553322_s_at	TEAD1	7003	TEA domain family member 1 (SV40 transcriptional enhancer factor)	30	27	27	27.7	30	23	24	25.5	23	26	27	25.5	28	37	52	37.6		-1.08	1	-1.1	0.9033	0	0	0		1.4	0.5309	0	0	0
209693_at	ASTN2	23245	astrotactin 2	31	41	38	36.5	36	40	40	38.6	32	40	37	36.3	45	52	52	49.4		1.06	1	-1	0.9982	0	0	0		1.4	0.2384	0	0	0
200969_at	SERP1	27230	stress-associated endoplasmic reticulum protein 1	293	314	279	294.8	307	259	313	292.1	329	324	322	324.7	381	398	420	399.5		-1.01	1	1.1	0.791	0	0	0		1.4	0.0679	0	0	0
204096_s_at	ELL	8178	elongation factor RNA polymerase II	31	31	32	31.3	35	37	33	35	33	33	34	33.3	41	42	44	42.4		1.12	1	1.1	0.6984	0	0	0		1.4	0.0189	0	0	0
203925_at	GCLM	2730	glutamate-cysteine ligase, modifier subunit	1131	1166	1148	1148.1	1075	996	1178	1080.5	1218	1262	1245	1241.4	1475	1598	1594	1555		-1.06	1	1.1	0.5161	0	0	0		1.4	0.0277	0	0	0
236389_x_at	OIT3	170392	Oncoprotein induced transcript 3	24	18	22	21.1	26	19	20	21.3	22	24	23	22.9	27	28	30	28.6		1.01	1	1.1	0.9451	0	0	0		1.4	0.2262	0	0	0
225407_at	MBP	4155	myelin basic protein	106	101	113	106.8	99	81	108	95.4	130	118	127	124.7	129	148	159	144.6		-1.12	1	1.2	0.7101	0	0	0		1.4	0.1402	0	0	0
225042_s_at	C12orf22	81566	chromosome 12 open reading frame 22	65	61	62	62.5	66	70	54	63	66	56	69	63.1	90	77	87	84.6		1.01	1	1	0.9916	0	0	0		1.4	0.0845	0	0	0
238141_s_at	LOC400092	400092	hypothetical LOC400092	18	24	18	19.9	24	35	22	26.1	24	24	22	23.7	33	27	22	27		1.31	1	1.2	0.8686	0	0	0		1.4	0.4311	0	0	0
226952_at	EAF1	85403	ELL associated factor 1	115	104	110	109.7	100	85	109	97.7	113	141	125	125.6	99	170	194	148.5		-1.12	1	1.1	0.8676	0	0	0		1.4	0.588	0	0	0
225577_at	HCG18	414777	HLA complex group 18	50	60	62	57.1	59	60	63	60.4	57	49	66	56.9	74	79	78	77.3		1.06	1	-1	0.9978	0	0	0		1.4	0.1512	0	0	0
222191_s_at	B4GALT7	11285	xylosylprotein beta 1,4-galactosyltransferase, polypeptide 7 (galactosyltransferase I)	65	76	76	72.1	72	82	75	76.6	73	72	73	73	101	104	89	97.6		1.06	1	1	0.986	0	0	0		1.4	0.1589	0	0	0
218295_s_at	NUP50	10762	nucleoporin 50kDa	65	77	66	69	66	60	73	66	67	65	65	65.7	81	95	106	93.4		-1.05	1	-1.1	0.9451	0	0	0		1.4	0.2492	0	0	0
236787_at			CDNA FLJ35091 fis, clone PLACE6005786	19	22	19	19.6	18	24	20	20.3	21	17	19	19.2	30	25	25	26.6		1.03	1	-1	0.9796	0	0	0		1.4	0.161	0	0	0
204759_at	RCBTB2	1102	regulator of chromosome condensation (RCC1) and BTB (POZ) domain containing protein 2	20	20	23	21.1	27	20	23	22.8	24	20	22	22.1	23	29	36	28.6		1.08	1	1	0.9631	0	0	0		1.4	0.4082	0	0	0
209287_s_at	CDC42EP3	10602	CDC42 effector protein (Rho GTPase binding) 3	46	52	54	50.7	56	60	52	55.8	51	53	53	52.4	62	72	72	68.5		1.1	1	1	0.9607	0	0	0		1.4	0.1338	0	0	0
202879_s_at	PSCD1	9267	pleckstrin homology, Sec7 and coiled-coil domains 1(cytohesin 1)	44	45	39	42.6	39	50	34	40.3	39	42	43	41.4	72	54	49	57.7		-1.06	1	-1	0.97	0	0	0		1.4	0.3488	0	0	0
225099_at	FBXO45	200933	F-box protein 45	85	91	94	89.6	85	76	95	85	118	117	110	114.9	118	121	126	121.2		-1.05	1	1.3	0.4528	0	0	0		1.4	0.0462	0	0	0
204823_at	NAV3	89795	neuron navigator 3	38	38	38	38.4	41	32	38	36.5	43	46	47	45.3	45	62	50	51.9		-1.05	1	1.2	0.5488	0	0	0		1.4	0.2283	0	0	0
231917_at	GFM2	84340	G elongation factor, mitochondrial 2	62	60	60	60.7	64	52	71	61.9	65	71	63	66.3	72	91	85	82.1		1.02	1	1.1	0.8379	0	0	0		1.4	0.1475	0	0	0
205826_at	MYOM2	9172	myomesin (M-protein) 2, 165kDa /// myomesin (M-protein) 2, 165kDa	33	36	39	35.7	36	38	36	37	40	36	43	39.6	47	46	52	48.3		1.04	1	1.1	0.9035	0	0	0		1.4	0.1304	0	0	0
217875_s_at	TMEPAI	56937	transmembrane, prostate androgen induced RNA	50	67	58	57.9	45	49	59	50.4	55	50	54	53.2	83	76	76	78.2		-1.15	1	-1.1	0.942	0	0	0		1.4	0.22	0	0	0
205566_at	ABHD2	11057	abhydrolase domain containing 2	87	96	98	93.4	89	100	91	93.2	103	102	100	101.8	124	126	129	126.3		-1	1	1.1	0.8318	0	0	0		1.4	0.0482	0	0	0
244699_at	AHI1	54806	Abelson helper integration site	89	82	94	88.2	86	68	103	84.4	109	97	105	103.3	88	123	157	119.2		-1.05	1	1.2	0.7665	0	0	0		1.4	0.5079	0	0	0
226402_at	CYP2U1	113612	cytochrome P450, family 2, subfamily U, polypeptide 1	28	28	28	28	30	21	30	27	26	28	23	25.4	26	40	52	37.8		-1.04	1	-1.1	0.9011	0	0	0		1.4	0.5927	0	0	0
222258_s_at	SH3BP4	23677	SH3-domain binding protein 4	246	279	268	263.9	257	251	280	262.2	291	295	305	297	348	347	376	356.7		-1.01	1	1.1	0.7772	0	0	0		1.4	0.0718	0	0	0
215831_at	PRO1621	29007	PRO1621 protein	11	12	13	11.7	13	13	13	13.1	13	12	13	12.7	14	15	19	15.8		1.12	1	1.1	0.904	0	0	0		1.4	0.3292	0	0	0
200020_at	TARDBP	23435	TAR DNA binding protein /// TAR DNA binding protein	421	437	416	424.5	428	387	441	418	430	434	427	430.6	573	549	600	573.6		-1.02	1	1	0.9451	0	0	0		1.4	0.0313	0	0	0
218655_s_at	FLJ20291	54883	hypothetical protein FLJ20291	67	65	60	64	61	36	62	51.4	54	60	62	58.7	75	89	96	86.5		-1.25	1	-1.1	0.8923	0	0	0		1.4	0.1819	0	0	0
209456_s_at	FBXW11	23291	F-box and WD-40 domain protein 11	40	44	44	42.3	36	39	44	39.4	42	46	44	44	46	63	65	57.2		-1.07	1	1	0.9451	0	0	0		1.4	0.3166	0	0	0
203861_s_at	ACTN2	88	actinin, alpha 2	55	44	56	51.3	52	64	44	52.6	56	52	56	54.6	72	67	68	69.3		1.03	1	1.1	0.9542	0	0	0		1.4	0.1743	0	0	0
202256_at	CD2BP2	10421	CD2 antigen (cytoplasmic tail) binding protein 2	100	115	111	108.5	92	112	114	105.5	103	98	114	104.7	163	133	146	146.5		-1.03	1	-1	0.966	0	0	0		1.4	0.1572	0	0	0
1554079_at	GALNTL4	374378	UDP-N-acetyl-alpha-D-galactosamine:polypeptide N-acetylgalactosaminyltransferase-like 4	87	107	96	96.3	98	99	109	101.7	91	93	109	97.4	123	126	142	130.1		1.06	1	1	0.9916	0	0	0		1.4	0.1583	0	0	0
209359_x_at	RUNX1	861	runt-related transcription factor 1 (acute myeloid leukemia 1; aml1 oncogene)	22	30	25	25.5	21	39	26	27.4	29	29	26	27.7	44	31	30	34.5		1.07	1	1.1	0.9527	0	0	0		1.4	0.4514	0	0	0
238179_at			Transcribed locus, strongly similar to XP_529805.1 PREDICTED: hypothetical protein XP_529805 [Pan troglodytes]	30	43	33	35.1	33	31	32	32.2	31	33	33	32.2	54	44	45	47.3		-1.09	1	-1.1	0.9542	0	0	0		1.4	0.3624	0	0	0
221214_s_at	NELF	26012	nasal embryonic LHRH factor	41	48	58	48.7	43	57	51	50.1	54	47	46	48.8	60	64	74	65.8		1.03	1	1	0.9989	0	0	0		1.4	0.3379	0	0	0
209459_s_at	ABAT	18	4-aminobutyrate aminotransferase	12	14	16	14	18	12	17	15.1	14	13	14	13.6	15	19	25	19		1.08	1	-1	0.9703	0	0	0		1.4	0.4875	0	0	0
221425_s_at	HBLD2	81689	HESB like domain containing 2 /// HESB like domain containing 2	120	130	134	127.8	119	87	117	106.8	142	160	152	150.9	157	183	178	172.5		-1.2	1	1.2	0.7207	0	0	0		1.4	0.1098	0	0	0
219474_at	TTMP	79669	TPA-induced transmembrane protein	34	37	39	36.7	35	32	35	34	37	32	36	34.9	46	47	56	49.6		-1.08	1	-1.1	0.9477	0	0	0		1.4	0.148	0	0	0
210151_s_at	DYRK3	8444	dual-specificity tyrosine-(Y)-phosphorylation regulated kinase 3	54	60	56	56.7	53	50	48	50.7	55	52	48	51.6	89	70	72	76.5		-1.12	1	-1.1	0.8768	0	0	0		1.4	0.1948	0	0	0
205940_at	MYH3	4621	myosin, heavy polypeptide 3, skeletal muscle, embryonic	15	15	15	14.8	13	17	17	15.9	12	16	16	14.6	18	22	20	20		1.07	1	-1	0.9906	0	0	0		1.4	0.092	0	0	0
203158_s_at	GLS	2744	glutaminase	34	43	37	37.7	43	33	45	39.6	40	36	44	39.9	43	56	55	51		1.05	1	1.1	0.9631	0	0	0		1.4	0.3068	0	0	0
225209_s_at	UBE2J2	118424	ubiquitin-conjugating enzyme E2, J2 (UBC6 homolog, yeast)	144	159	166	155.9	144	143	161	149.4	149	153	151	151	200	221	211	210.4		-1.04	1	-1	0.9568	0	0	0		1.3	0.0862	0	0	0
213246_at	C14orf109	26175	chromosome 14 open reading frame 109	255	282	273	270	276	241	293	269	285	312	298	297.9	310	392	398	364.5		-1	1	1.1	0.8243	0	0	0		1.3	0.2124	0	0	0
221722_x_at	LZTS1	11178	leucine zipper, putative tumor suppressor 1	21	20	20	20	19	29	20	22.2	19	20	19	19.3	32	27	23	27		1.11	1	-1	0.8983	0	0	0		1.3	0.2377	0	0	0
231807_at	KIAA1217	56243	KIAA1217	39	38	39	38.6	50	27	46	39.8	34	45	38	38.9	35	63	64	52.1		1.03	1	1	0.9953	0	0	0		1.3	0.5671	0	0	0
235207_at				117	109	99	108.1	117	81	108	100.9	115	128	139	126.9	125	154	162	145.9		-1.07	1	1.2	0.8396	0	0	0		1.3	0.2429	0	0	0
202193_at	LIMK2	3985	LIM domain kinase 2	26	26	33	28.3	31	22	30	27.5	34	31	28	31.1	32	46	38	38.3		-1.03	1	1.1	0.9444	0	0	0		1.3	0.4039	0	0	0
227698_s_at	RAB40C	57799	RAB40C, member RAS oncogene family	82	98	105	94.4	86	89	108	94	105	112	126	113.7	109	132	144	127.3		-1	1	1.2	0.8606	0	0	0		1.3	0.3164	0	0	0
1558290_a_at	PVT1 /// LOC441378	441378 /// 5820	Pvt1 oncogene homolog, MYC activator (mouse) /// LOC441378	127	126	127	126.4	135	118	142	131.2	122	130	128	126.6	152	169	193	170.4		1.04	1	1	0.9927	0	0	0		1.3	0.1497	0	0	0
218955_at	BRF2	55290	BRF2, subunit of RNA polymerase III transcription initiation factor, BRF1-like	95	97	103	98.3	97	94	85	92.2	92	101	89	93.8	136	135	127	132.5		-1.07	1	-1	0.9335	0	0	0		1.3	0.039	0	0	0
205397_x_at	SMAD3	4088	SMAD, mothers against DPP homolog 3 (Drosophila)	70	92	81	80.6	84	73	81	79.2	82	89	104	90.9	101	113	112	108.7		-1.02	1	1.1	0.9247	0	0	0		1.3	0.2086	0	0	0
225244_at	C1orf142	116841	chromosome 1 open reading frame 142	177	185	190	183.6	181	179	195	184.6	164	194	193	183	222	251	272	247.5		1.01	1	-1	0.9967	0	0	0		1.3	0.1231	0	0	0
222073_at	COL4A3	1285	collagen, type IV, alpha 3 (Goodpasture antigen)	70	57	62	62.7	57	30	75	50.4	62	62	53	59.1	57	101	106	84.5		-1.24	1	-1.1	0.9565	0	0	0		1.3	0.6014	0	0	0
202441_at	SPFH1	10613	SPFH domain family, member 1	499	525	504	509.5	524	509	529	520.4	483	502	525	503.1	684	690	686	686.5		1.02	1	-1	0.9749	0	0	0		1.3	0.0103	0	0	0
220206_at	ZMYM1	79830	zinc finger, MYM-type 1	64	65	66	65.1	67	38	77	58.3	68	65	66	66.2	69	92	106	87.7		-1.12	1	1	0.9414	0	0	0		1.3	0.3685	0	0	0
225857_s_at		388796	RNA, U71A small nucleolar	516	587	575	558.6	498	544	543	528.2	570	574	584	575.9	695	754	813	752.6		-1.06	1	1	0.957	0	0	0		1.3	0.1184	0	0	0
214975_s_at	MTMR1	8776	myotubularin related protein 1	17	24	18	19.3	21	19	26	21.9	19	21	22	20.8	21	27	31	25.9		1.14	1	1.1	0.9595	0	0	0		1.3	0.4525	0	0	0
1553694_a_at	PIK3C2A	5286	phosphoinositide-3-kinase, class 2, alpha polypeptide	80	75	73	75.9	78	51	79	68	85	86	85	85.6	78	116	118	102.3		-1.12	1	1.1	0.6418	0	0	0		1.3	0.4149	0	0	0
225149_at	FLJ11305	55795	hypothetical protein FLJ11305	75	78	70	74.5	74	72	79	75.2	65	69	74	69.4	85	112	106	100.3		1.01	1	-1.1	0.9035	0	0	0		1.3	0.2223	0	0	0
244864_at				122	110	120	117.2	116	98	127	112.9	115	128	122	121.8	156	148	170	157.8		-1.04	1	1	0.9466	0	0	0		1.3	0.0886	0	0	0
243552_at				33	32	31	32.3	31	25	32	29.1	40	46	35	40.3	35	49	48	43.4		-1.11	1	1.2	0.7942	0	0	0		1.3	0.3196	0	0	0
235191_at	LOC148189	148189	hypothetical protein LOC148189	79	83	85	82.4	73	68	86	75.1	85	78	91	84.8	89	118	131	111		-1.1	1	1	0.9687	0	0	0		1.3	0.3383	0	0	0
210813_s_at	XRCC4	7518	X-ray repair complementing defective repair in Chinese hamster cells 4	66	67	70	67.5	65	53	71	62.5	58	68	72	65.7	76	99	99	90.9		-1.08	1	-1	0.9764	0	0	0		1.3	0.2275	0	0	0
221826_at	ANGEL2	90806	angel homolog 2 (Drosophila)	45	57	57	52.8	53	37	58	48.5	45	55	57	52.1	52	85	81	71.2		-1.09	1	-1	0.9916	0	0	0		1.3	0.5264	0	0	0
232219_x_at	USP21	27005	ubiquitin specific peptidase 21	84	78	82	81.3	90	62	80	76.3	97	93	90	93.5	99	117	114	109.5		-1.06	1	1.2	0.6151	0	0	0		1.3	0.1098	0	0	0
227149_at	TNRC6C	57690	trinucleotide repeat containing 6C	19	21	19	19.6	16	38	20	23	19	18	19	18.5	25	27	28	26.4		1.17	1	-1.1	0.8532	0	0	0		1.3	0.0643	0	0	0
218858_at	DEPDC6	64798	DEP domain containing 6	39	46	49	44.5	45	49	50	48	49	48	51	49.6	47	68	67	59.9		1.08	1	1.1	0.904	0	0	0		1.3	0.4116	0	0	0
240615_at	PTOV1	53635	Prostate tumor overexpressed gene 1	20	20	19	19.7	17	22	18	18.7	16	19	20	18	26	20	37	26.5		-1.05	1	-1.1	0.9205	0	0	0		1.3	0.5283	0	0	0
227917_at		401454	Hypothetical protein LOC157278	93	106	103	100.4	96	72	106	90.1	89	99	103	96.8	124	134	148	135.1		-1.11	1	-1	0.9631	0	0	0		1.3	0.1355	0	0	0
219922_s_at	LTBP3	4054	latent transforming growth factor beta binding protein 3	96	115	104	104.6	128	109	131	122.4	118	125	118	120.5	118	152	156	140.8		1.17	1	1.2	0.824	0	0	0		1.3	0.2864	0	0	0
201220_x_at	CTBP2	1488	C-terminal binding protein 2	1023	1170	1131	1106.5	1091	1106	1173	1122.8	1133	1098	1078	1102.9	1616	1399	1461	1489.4		1.01	1	-1	0.9952	0	0	0		1.3	0.1142	0	0	0
207439_s_at	SLC35A2	7355	solute carrier family 35 (UDP-galactose transporter), member A2	37	28	30	31.2	35	31	29	31.6	26	33	41	32.4	37	42	49	42		1.01	1	1	0.986	0	0	0		1.3	0.353	0	0	0
223273_at	C14orf142	84520	chromosome 14 open reading frame 142	140	156	170	154.9	152	129	157	145.2	166	181	162	169.5	195	216	216	208.5		-1.07	1	1.1	0.9072	0	0	0		1.3	0.1391	0	0	0
206245_s_at	IVNS1ABP	10625	influenza virus NS1A binding protein	177	193	193	187.4	185	180	204	189.6	183	170	195	182.5	204	272	289	252.2		1.01	1	-1	0.9687	0	0	0		1.3	0.3219	0	0	0
201005_at	CD9	928	CD9 antigen (p24)	342	355	350	349.2	348	316	367	343.2	322	363	353	345.6	439	490	483	469.9		-1.02	1	-1	0.9841	0	0	0		1.3	0.0495	0	0	0
1553217_s_at	ZNF41	7592	zinc finger protein 41	12	15	15	14.1	16	13	16	14.8	20	14	15	16.1	16	21	20	19		1.05	1	1.1	0.9338	0	0	0		1.3	0.3266	0	0	0
203195_s_at	NUP98	4928	nucleoporin 98kDa	125	148	172	146.9	150	138	163	150.1	152	145	162	153	173	209	214	197.6		1.02	1	1	0.9767	0	0	0		1.3	0.33	0	0	0
222409_at	CORO1C	23603	coronin, actin binding protein, 1C	421	406	390	405.3	396	341	433	388.5	427	390	406	407.3	588	507	543	545.4		-1.04	1	1	0.9916	0	0	0		1.3	0.0813	0	0	0
209586_s_at	PRUNE	58497	prune homolog (Drosophila)	155	172	175	167.3	154	132	180	153.9	181	170	185	178.4	225	219	232	225.1		-1.09	1	1.1	0.904	0	0	0		1.3	0.063	0	0	0
204353_s_at	POT1	25913	POT1 protection of telomeres 1 homolog (S. pombe)	92	90	98	93.3	95	81	99	91.2	88	108	100	98.2	110	129	140	125.5		-1.02	1	1.1	0.9518	0	0	0		1.3	0.1706	0	0	0
223048_at	FLJ20487	54949	hypothetical protein FLJ20487	166	210	204	192.2	183	171	201	184.8	184	191	196	190.3	251	262	263	258.6		-1.04	1	-1	0.9922	0	0	0		1.3	0.1763	0	0	0
234294_x_at	GATAD2A	54815	GATA zinc finger domain containing 2A	120	123	134	125.5	106	105	116	109	135	116	126	125.6	180	170	158	168.8		-1.15	1	1	0.9993	0	0	0		1.3	0.0862	0	0	0
203234_at	UPP1	7378	uridine phosphorylase 1	84	102	86	90.2	92	81	89	87.3	94	94	90	92.5	110	120	135	121.4		-1.03	1	1	0.9774	0	0	0		1.3	0.222	0	0	0
208737_at	ATP6V1G1	9550	ATPase, H+ transporting, lysosomal 13kDa, V1 subunit G isoform 1	760	763	734	752.2	762	704	791	751.5	822	804	808	811.5	916	1045	1082	1011.7		-1	1	1.1	0.5352	0	0	0		1.3	0.0938	0	0	0
222481_at	FXC1	26515	fracture callus 1 homolog (rat)	65	72	72	69.7	66	52	69	61.6	74	67	74	71.7	86	97	99	93.8		-1.13	1	1	0.9674	0	0	0		1.3	0.0961	0	0	0
201287_s_at	SDC1	6382	syndecan 1	538	559	512	536.2	551	557	541	549.8	585	523	565	557.2	733	696	735	720.9		1.03	1	1	0.9451	0	0	0		1.3	0.0358	0	0	0
209313_at	XAB1	11321	XPA binding protein 1, GTPase	232	263	272	255.3	254	212	268	243.5	254	253	254	253.7	349	341	340	343.3		-1.05	1	-1	0.9921	0	0	0		1.3	0.0839	0	0	0
203064_s_at	FOXK2	3607	forkhead box K2	136	149	149	144.6	140	120	153	137.1	121	140	141	133.9	184	191	209	194.4		-1.05	1	-1.1	0.9102	0	0	0		1.3	0.0792	0	0	0
219693_at	AGPAT4	56895	1-acylglycerol-3-phosphate O-acyltransferase 4 (lysophosphatidic acid acyltransferase, delta)	23	25	27	24.9	24	25	24	24.2	27	24	29	26.3	32	31	39	33.5		-1.03	1	1.1	0.9484	0	0	0		1.3	0.215	0	0	0
1557701_s_at	POLH	5429	polymerase (DNA directed), eta	20	20	19	19.7	18	23	16	19.1	17	19	20	18.8	28	25	26	26.5		-1.03	1	-1.1	0.9269	0	0	0		1.3	0.0527	0	0	0
222393_s_at	MAK3	80218	Mak3 homolog (S. cerevisiae)	253	232	233	239	234	217	233	227.7	246	247	280	257.3	259	339	378	321.1		-1.05	1	1.1	0.9035	0	0	0		1.3	0.3394	0	0	0
225945_at	ZNF655	79027	zinc finger protein 655	119	132	128	126.1	147	109	146	132.8	142	154	134	143.3	145	179	187	169.4		1.05	1	1.1	0.8193	0	0	0		1.3	0.2183	0	0	0
209306_s_at	SWAP70	23075	SWAP-70 protein	211	194	191	198.7	184	159	194	178.3	162	187	178	175.5	257	266	278	266.9		-1.11	1	-1.1	0.8287	0	0	0		1.3	0.057	0	0	0
200759_x_at	NFE2L1	4779	nuclear factor (erythroid-derived 2)-like 1	289	300	302	296.7	299	288	329	305.1	287	276	294	285.5	400	388	409	398.6		1.03	1	-1	0.8853	0	0	0		1.3	0.0167	0	0	0
210517_s_at	AKAP12	9590	A kinase (PRKA) anchor protein (gravin) 12	796	801	813	803.3	749	760	864	789	949	931	936	938.7	1022	1052	1168	1078.9		-1.02	1	1.2	0.1116	0	0	0		1.3	0.0616	0	0	0
238403_at	GAB2	9846	GRB2-associated binding protein 2	24	25	21	23.2	28	26	27	27	23	26	27	25.6	32	33	28	31.1		1.16	1	1.1	0.9033	0	0	0		1.3	0.1463	0	0	0
222618_at		401500	Hypothetical gene supported by AL512690	83	79	86	82.5	85	80	87	83.9	83	84	75	80.9	113	113	107	110.8		1.02	1	-1	0.9757	0	0	0		1.3	0.0396	0	0	0
219992_at	TAC3	6866	tachykinin 3 (neuromedin K, neurokinin beta)	43	40	38	40.3	47	42	45	44.6	44	39	46	43	63	43	58	54.1		1.11	1	1.1	0.9336	0	0	0		1.3	0.36	0	0	0
223202_s_at	RP13-360B22.2	84187	hypothetical protein FLJ22679	161	169	165	165.1	168	157	180	168.1	165	169	170	168.2	224	213	229	221.7		1.02	1	1	0.9217	0	0	0		1.3	0.0231	0	0	0
216034_at	SUHW1	129025	suppressor of hairy wing homolog 1 (Drosophila)	31	31	33	31.5	29	24	32	28.2	29	33	30	30.5	33	48	48	42.3		-1.12	1	-1	0.957	0	0	0		1.3	0.3786	0	0	0
218527_at	APTX	54840	aprataxin	193	194	207	197.7	196	172	191	186.3	197	200	208	201.6	243	283	272	265.4		-1.06	1	1	0.9602	0	0	0		1.3	0.0929	0	0	0
223025_s_at	AP1M1	8907	adaptor-related protein complex 1, mu 1 subunit	72	81	79	77.3	75	69	74	72.6	81	75	93	82.7	106	90	117	103.7		-1.06	1	1.1	0.942	0	0	0		1.3	0.2073	0	0	0
223572_at	GUP1	57467	GUP1, glycerol uptake/transporter homolog (yeast)	20	23	25	22.7	20	30	26	25	23	25	24	23.9	29	34	28	30.4		1.1	1	1.1	0.957	0	0	0		1.3	0.2248	0	0	0
219558_at	ATP13A3	79572	ATPase type 13A3	83	76	81	79.9	74	70	80	74.6	84	75	73	76.8	98	110	114	107.3		-1.07	1	-1	0.9556	0	0	0		1.3	0.0961	0	0	0
1553096_s_at	BCL2L11	10018	BCL2-like 11 (apoptosis facilitator)	122	118	113	117.5	126	142	118	128	121	129	126	125.3	174	138	164	157.8		1.09	1	1.1	0.8554	0	0	0		1.3	0.1692	0	0	0
224188_s_at	LOC63929	63929	hypothetical protein LOC63929	30	30	28	29.4	25	44	31	32.4	37	33	33	34.1	42	36	40	39.4		1.1	1	1.2	0.7569	0	0	0		1.3	0.0998	0	0	0
224046_s_at	PDE7A	5150	phosphodiesterase 7A	43	35	52	42.5	37	39	46	40.6	36	42	49	41.8	57	52	62	57		-1.05	1	-1	0.9927	0	0	0		1.3	0.3733	0	0	0
218648_at	TORC3	64784	transducer of regulated cAMP response element-binding protein (CREB) 3	221	233	220	224.5	234	203	225	220.6	233	222	232	228.6	305	286	313	301.3		-1.02	1	1	0.9569	0	0	0		1.3	0.0387	0	0	0
210474_s_at	CDC2L1 /// CDC2L2	984 /// 985	cell division cycle 2-like 1 (PITSLRE proteins) /// cell division cycle 2-like 2 (PITSLRE proteins)	38	39	43	40.1	44	43	43	43.3	40	38	42	40	58	54	49	53.8		1.08	1	-1	0.9985	0	0	0		1.3	0.1361	0	0	0
225023_at	GOPC	57120	golgi associated PDZ and coiled-coil motif containing	56	53	58	55.6	56	35	53	47.1	51	54	56	53.4	70	76	77	74.6		-1.18	1	-1	0.9361	0	0	0		1.3	0.0585	0	0	0
212436_at	TRIM33	51592	tripartite motif-containing 33	44	52	51	48.9	49	35	57	45.6	56	51	51	52.5	52	78	69	65.7		-1.07	1	1.1	0.9199	0	0	0		1.3	0.3789	0	0	0
214179_s_at	NFE2L1	4779	nuclear factor (erythroid-derived 2)-like 1	183	208	200	196.9	191	190	225	201.4	183	192	193	189	259	262	272	264.2		1.02	1	-1	0.9373	0	0	0		1.3	0.0605	0	0	0
216100_s_at	TOR1AIP1	26092	torsin A interacting protein 1	51	49	42	47.3	54	32	50	44.2	40	54	50	47.7	45	76	75	63.4		-1.07	1	1	0.9935	0	0	0		1.3	0.5527	0	0	0
205133_s_at	HSPE1	3336	heat shock 10kDa protein 1 (chaperonin 10)	1984	1840	1889	1903.1	1895	1848	1895	1879.3	1751	2086	2097	1971.2	2138	2774	2807	2553.1		-1.01	1	1	0.968	0	0	0		1.3	0.2431	0	0	0
209710_at	GATA2	2624	GATA binding protein 2	67	68	72	69.1	81	71	69	73.3	88	66	70	74.1	90	90	98	92.7		1.06	1	1.1	0.9569	0	0	0		1.3	0.0445	0	0	0
1555761_x_at	RBM15	64783	RNA binding motif protein 15	96	101	93	96.5	90	110	90	96.4	107	95	97	99.8	146	126	118	129.5		-1	1	1	0.9543	0	0	0		1.3	0.1487	0	0	0
228386_s_at	DDX59	83479	DEAD (Asp-Glu-Ala-Asp) box polypeptide 59	44	52	48	48	53	41	49	47.6	44	46	51	46.9	51	63	83	64.4		-1.01	1	-1	0.9796	0	0	0		1.3	0.4548	0	0	0
235235_s_at	FLJ36874	219988	hypothetical protein FLJ36874	61	69	65	64.8	61	60	62	61.2	57	67	67	63.3	89	85	87	87		-1.06	1	-1	0.9774	0	0	0		1.3	0.0496	0	0	0
226622_at	MUC20	200958	mucin 20	32	24	25	26.9	27	29	24	26.4	29	25	27	26.8	40	37	31	36		-1.02	1	-1	0.9987	0	0	0		1.3	0.3525	0	0	0
203233_at	IL4R	3566	interleukin 4 receptor	88	80	87	85.2	82	85	103	89.3	80	83	92	84.8	119	104	121	114.3		1.05	1	-1	0.9937	0	0	0		1.3	0.1105	0	0	0
236374_at	LOC613212	613212	hypothetical LOC613212	18	17	21	18.7	20	24	17	20.1	20	19	20	19.7	30	23	23	25.1		1.07	1	1.1	0.9589	0	0	0		1.3	0.3141	0	0	0
208770_s_at	EIF4EBP2	1979	eukaryotic translation initiation factor 4E binding protein 2	102	117	110	109.7	103	90	113	101.3	99	110	111	106.4	153	138	151	147.1		-1.08	1	-1	0.966	0	0	0		1.3	0.0935	0	0	0
218089_at	C20orf4	25980	chromosome 20 open reading frame 4	178	179	185	180.6	171	162	166	166.2	165	163	175	167.5	231	243	253	242		-1.09	1	-1.1	0.7753	0	0	0		1.3	0.0307	0	0	0
217597_x_at	RAB40B	10966	RAB40B, member RAS oncogene family	54	67	58	59.8	63	88	64	70.9	63	69	60	64	76	82	82	80.1		1.19	1	1.1	0.9451	0	0	0		1.3	0.1491	0	0	0
221617_at	PGK1	5230	Phosphoglycerate kinase 1	42	32	40	38	41	35	49	41.1	45	39	39	41.1	43	43	71	50.9		1.08	1	1.1	0.9518	0	0	0		1.3	0.5476	0	0	0
243509_at	BTG1	694	B-cell translocation gene 1, anti-proliferative	35	30	38	34.4	41	25	40	34.7	32	29	28	29.5	35	46	61	46.1		1.01	1	-1.2	0.8716	0	0	0		1.3	0.5177	0	0	0
1562966_at	KIAA1217	56243	KIAA1217	19	17	17	17.7	18	20	17	17.9	17	19	18	18	25	24	21	23.7		1.01	1	1	0.9796	0	0	0		1.3	0.1552	0	0	0
201529_s_at	RPA1	6117	replication protein A1, 70kDa	309	340	318	322.2	312	323	344	326.3	337	339	356	344.3	409	440	446	431.7		1.01	1	1.1	0.8649	0	0	0		1.3	0.0579	0	0	0
1554606_at	FLJ36090	153241	hypothetical protein FLJ36090	34	37	31	33.7	35	30	38	34	32	40	40	37.2	32	51	57	45.2		1.01	1	1.1	0.9348	0	0	0		1.3	0.5525	0	0	0
220008_at	KIAA2002	79834	KIAA2002 protein	39	28	34	33.4	38	55	39	43.6	50	37	37	40.8	56	43	38	44.8		1.3	1	1.2	0.904	0	0	0		1.3	0.4603	0	0	0
218442_at	TTC4	7268	tetratricopeptide repeat domain 4	105	106	104	104.9	103	88	104	98.4	100	107	108	105.3	139	131	152	140.5		-1.07	1	1	0.9893	0	0	0		1.3	0.071	0	0	0
226839_at	TRA16	126382	TR4 orphan receptor associated protein TRA16	86	77	84	82.2	90	80	91	86.9	90	97	84	90.3	122	101	109	110.2		1.06	1	1.1	0.8796	0	0	0		1.3	0.1386	0	0	0
202398_at	AP3S2	10239	adaptor-related protein complex 3, sigma 2 subunit	49	56	49	51.3	49	45	54	49	57	55	55	55.6	63	68	76	68.8		-1.05	1	1.1	0.8914	0	0	0		1.3	0.1692	0	0	0
223254_s_at	KIAA1333	55632	KIAA1333	171	204	181	185	175	146	205	173.2	187	220	180	194.7	239	265	239	247.7		-1.07	1	1.1	0.9631	0	0	0		1.3	0.1313	0	0	0
204384_at	GOLGA2	2801	golgi autoantigen, golgin subfamily a, 2	49	59	47	51.4	49	57	68	57.5	50	54	56	53.2	79	60	69	68.8		1.12	1	1	0.9738	0	0	0		1.3	0.2894	0	0	0
213858_at	ZNF250	58500	zinc finger protein 250	45	38	40	41	43	33	38	38	43	40	46	43.1	50	55	60	54.9		-1.08	1	1.1	0.9534	0	0	0		1.3	0.1659	0	0	0
221752_at	SSH1	54434	Slingshot homolog 1 (Drosophila)	103	131	131	121.2	126	94	134	116.6	146	153	151	150	157	160	171	162.2		-1.04	1	1.2	0.8047	0	0	0		1.3	0.2125	0	0	0
227062_at	TncRNA	283131	trophoblast-derived noncoding RNA	85	74	90	82.8	90	94	87	90.4	89	93	74	85	116	106	111	110.8		1.09	1	1	0.9829	0	0	0		1.3	0.1331	0	0	0
211475_s_at	BAG1	573	BCL2-associated athanogene	225	229	222	224.9	232	215	232	226.1	228	228	235	230.4	280	297	328	301.1		1.01	1	1	0.8853	0	0	0		1.3	0.0809	0	0	0
227356_at			CDNA FLJ26015 fis, clone MPC03596	80	98	110	95.2	98	76	101	91	100	90	89	93	112	132	140	127.4		-1.05	1	-1	0.9861	0	0	0		1.3	0.3455	0	0	0
229231_at	LRRC37B	114659	leucine rich repeat containing 37B	121	126	121	122.5	124	112	126	120.1	118	130	129	125.5	164	168	159	163.9		-1.02	1	1	0.958	0	0	0		1.3	0.0166	0	0	0
219905_at	ERMAP	114625	erythroblast membrane-associated protein	28	31	29	29	31	27	28	28.8	29	31	29	29.2	38	41	37	38.8		-1.01	1	1	0.9893	0	0	0		1.3	0.0663	0	0	0
44669_at			Homo sapiens, clone IMAGE:3626627, mRNA	173	191	184	182.6	179	188	183	183.4	152	172	181	167.9	245	223	267	244.4		1	1	-1.1	0.904	0	0	0		1.3	0.1235	0	0	0
200807_s_at	HSPD1	3329	heat shock 60kDa protein 1 (chaperonin)	6601	6439	6738	6591.3	6661	6416	6447	6507	6772	6957	6812	6846.3	8895	8928	8637	8818.8		-1.01	1	1	0.8263	0	0	0		1.3	0.012	0	0	0
230343_at			Transcribed locus	35	41	44	40	39	37	40	38.8	36	39	35	36.5	50	61	50	53.5		-1.03	1	-1.1	0.9149	0	0	0		1.3	0.2567	0	0	0
200049_at	MYST2	11143	MYST histone acetyltransferase 2 /// MYST histone acetyltransferase 2	149	148	162	152.9	145	135	151	143.5	149	136	144	143.3	179	213	225	204.6		-1.07	1	-1.1	0.8883	0	0	0		1.3	0.1771	0	0	0
231692_at	GPI7	54872	GPI7 protein	20	15	18	17.4	17	33	20	22.6	19	17	15	16.9	30	23	18	23.3		1.3	1	-1	0.9795	0	0	0		1.3	0.5142	0	0	0
223201_s_at	RP13-360B22.2	84187	hypothetical protein FLJ22679	160	171	187	172.4	179	160	181	172.9	166	180	199	180.8	199	242	254	230.6		1	1	1	0.9607	0	0	0		1.3	0.227	0	0	0
217866_at	FLJ12529	79869	pre-mRNA cleavage factor I, 59 kDa subunit	145	146	143	144.7	146	133	141	140.3	140	140	166	148.4	190	189	202	193.5		-1.03	1	1	0.9749	0	0	0		1.3	0.0199	0	0	0
1565454_at	XAGE-4	139629	XAGE-4 protein	73	62	56	63.4	71	64	53	62.3	77	73	66	71.9	108	79	71	84.7		-1.02	1	1.1	0.9033	0	0	0		1.3	0.4452	0	0	0
1554539_a_at	RHOF	54509	ras homolog gene family, member F (in filopodia)	87	101	102	96.5	111	104	116	109.8	104	107	110	106.7	116	133	140	129		1.14	1	1.1	0.8662	0	0	0		1.3	0.1789	0	0	0
226929_at	MTHFR	4524	5,10-methylenetetrahydrofolate reductase (NADPH)	61	59	63	61.1	62	65	61	62.9	59	57	61	59.3	78	81	86	81.7		1.03	1	-1	0.9361	0	0	0		1.3	0.0497	0	0	0
201811_x_at	SH3BP5	9467	SH3-domain binding protein 5 (BTK-associated)	145	171	173	162.8	181	167	187	178	131	147	164	146.6	178	232	251	217.6		1.09	1	-1.1	0.9203	0	0	0		1.3	0.3541	0	0	0
216627_s_at	B4GALT1	2683	UDP-Gal:betaGlcNAc beta 1,4- galactosyltransferase, polypeptide 1	23	25	23	23.8	24	24	26	24.5	22	24	18	21.3	26	33	37	31.9		1.03	1	-1.1	0.918	0	0	0		1.3	0.3248	0	0	0
1555895_at	DNM2	1785	dynamin 2	59	69	69	65.6	69	57	71	65.3	56	71	72	66	98	87	79	87.7		-1	1	1	0.9953	0	0	0		1.3	0.2111	0	0	0
215283_at	LOC400642	400642	hypothetical gene supported by BC041875; BX648984	28	27	25	26.8	27	26	25	26.2	30	28	31	30	34	39	35	35.8		-1.02	1	1.1	0.8287	0	0	0		1.3	0.1016	0	0	0
242005_at				36	36	38	36.7	40	28	35	34.2	45	56	51	50.6	43	49	56	49.1		-1.07	1	1.4	0.5552	0	0	0		1.3	0.211	0	0	0
205130_at	RAGE	5891	renal tumor antigen	53	56	47	52	53	55	49	52.5	52	59	60	56.8	71	71	66	69.5		1.01	1	1.1	0.9149	0	0	0		1.3	0.1083	0	0	0
212849_at	AXIN1	8312	axin 1	67	66	64	65.6	63	72	68	67.2	65	69	62	65.4	89	84	91	87.7		1.02	1	-1	0.9927	0	0	0		1.3	0.0314	0	0	0
209130_at	SNAP23	8773	synaptosomal-associated protein, 23kDa	296	314	306	305.3	292	264	311	288.4	313	323	329	321.8	379	405	444	408.2		-1.06	1	1.1	0.8321	0	0	0		1.3	0.0866	0	0	0
210329_s_at	SGCD	6444	sarcoglycan, delta (35kDa dystrophin-associated glycoprotein)	41	47	40	42.5	44	43	38	41.6	43	40	42	41.8	67	51	54	56.8		-1.02	1	-1	0.9798	0	0	0		1.3	0.2579	0	0	0
209859_at	TRIM9	114088	tripartite motif-containing 9	63	65	64	64.1	67	43	68	57.9	56	59	61	58.5	60	99	105	85.6		-1.11	1	-1.1	0.7176	0	0	0		1.3	0.542	0	0	0
229347_at			CDNA FLJ37826 fis, clone BRSSN2006133	29	34	32	31.6	32	25	35	30.4	33	37	32	34.1	35	44	49	42.3		-1.04	1	1.1	0.9179	0	0	0		1.3	0.3303	0	0	0
219047_s_at	ZNF668	79759	zinc finger protein 668	41	43	44	42.7	39	47	42	42.3	42	46	42	43.1	59	60	53	57.1		-1.01	1	1	0.9838	0	0	0		1.3	0.0777	0	0	0
219816_s_at	RBM23	55147	RNA binding motif protein 23	285	310	333	308.9	317	299	340	318.3	327	315	339	326.8	407	414	417	412.8		1.03	1	1.1	0.9247	0	0	0		1.3	0.0757	0	0	0
217672_x_at				28	27	27	27.2	28	24	28	26.8	24	28	30	27.2	30	40	40	36.3		-1.02	1	1	0.9996	0	0	0		1.3	0.2634	0	0	0
224474_x_at	SMEK2	57223	KIAA1387 protein /// KIAA1387 protein	200	186	182	189.2	184	179	197	186.4	205	185	194	194.7	245	269	245	252.8		-1.02	1	1	0.9614	0	0	0		1.3	0.071	0	0	0
214749_s_at	ARMCX6	54470	armadillo repeat containing, X-linked 6	407	498	466	455.2	465	418	471	450.6	463	424	423	436	683	557	592	608.2		-1.01	1	-1	0.9626	0	0	0		1.3	0.219	0	0	0
240382_at	DSP	1832	Desmoplakin	27	31	33	30.1	36	28	40	34.6	32	32	34	32.9	33	44	45	40.2		1.15	1	1.1	0.904	0	0	0		1.3	0.3622	0	0	0
211843_x_at	CYP3A7	1551	cytochrome P450, family 3, subfamily A, polypeptide 7	31	38	36	35.2	38	37	39	37.7	35	35	34	34.5	39	37	72	47		1.07	1	-1	0.9796	0	0	0		1.3	0.6346	0	0	0
1555426_a_at	OTUD5	55593	OTU domain containing 5	61	69	66	65.1	63	70	79	70.4	63	61	75	65.9	95	79	88	87		1.08	1	1	0.9905	0	0	0		1.3	0.1368	0	0	0
204657_s_at	SHB	6461	Src homology 2 domain containing adaptor protein B	52	68	65	61.5	70	75	67	70.6	66	69	76	70.4	77	78	93	82.2		1.15	1	1.1	0.9033	0	0	0		1.3	0.2982	0	0	0
228037_at	RARA	5914	Retinoic acid receptor, alpha	94	107	103	101.1	95	78	113	94.2	89	96	95	93.4	134	141	131	135.1		-1.07	1	-1.1	0.8848	0	0	0		1.3	0.0737	0	0	0
202289_s_at	TACC2	10579	transforming, acidic coiled-coil containing protein 2	636	654	644	644.5	654	579	657	629.3	622	652	661	644.9	802	928	856	860.7		-1.02	1	1	0.9982	0	0	0		1.3	0.0704	0	0	0
1552280_at	TIMD4	91937	T-cell immunoglobulin and mucin domain containing 4	15	14	14	14.4	15	19	13	15.3	17	15	14	15.1	20	20	18	19.2		1.06	1	1	0.9536	0	0	0		1.3	0.0849	0	0	0
243463_s_at	RIT1	6016	Ras-like without CAAX 1	38	33	37	36	35	27	36	32.4	32	32	35	33	39	50	57	48.1		-1.11	1	-1.1	0.9028	0	0	0		1.3	0.3632	0	0	0
203950_s_at	CLCN6	1185	chloride channel 6	36	53	46	44.5	48	40	47	45.2	41	49	42	43.8	59	59	59	59.4		1.01	1	-1	0.9921	0	0	0		1.3	0.3274	0	0	0
230903_s_at	INM01	157695	Chromosome 8 open reading frame 42	97	98	107	100.7	99	93	103	98	90	111	91	97.1	116	146	144	134.4		-1.03	1	-1	0.9703	0	0	0		1.3	0.2089	0	0	0
205676_at	CYP27B1	1594	cytochrome P450, family 27, subfamily B, polypeptide 1	18	16	17	16.7	17	16	17	16.4	19	15	16	16.3	20	23	25	22.3		-1.02	1	-1	0.9841	0	0	0		1.3	0.1804	0	0	0
229312_s_at	GKAP1	80318	G kinase anchoring protein 1	73	81	73	75.6	78	60	86	74	84	92	84	86.7	83	106	117	100.9		-1.02	1	1.1	0.7823	0	0	0		1.3	0.3142	0	0	0
222376_at			Transcribed locus, weakly similar to XP_496299.1 PREDICTED: hypothetical protein LOC148206 [Homo sapiens]	48	66	65	58.7	64	48	66	58.8	55	57	60	57.5	76	84	75	78.4		1	1	-1	0.9878	0	0	0		1.3	0.3213	0	0	0
224555_x_at	IL1F7	27178	interleukin 1 family, member 7 (zeta)	65	60	56	60.2	74	87	66	75	88	65	77	75.8	97	76	70	80.3		1.25	1	1.3	0.8364	0	0	0		1.3	0.3138	0	0	0
202527_s_at	SMAD4	4089	SMAD, mothers against DPP homolog 4 (Drosophila)	143	158	170	156.8	161	142	166	155.7	136	154	165	151.2	148	248	248	209.1		-1.01	1	-1	0.9713	0	0	0		1.3	0.5477	0	0	0
221247_s_at	WBSCR16	81554	Williams-Beuren syndrome chromosome region 16 /// Williams-Beuren syndrome chromosome region 16	100	130	132	119.9	124	118	130	124	125	131	128	128.2	157	160	163	159.8		1.03	1	1.1	0.9572	0	0	0		1.3	0.2406	0	0	0
203223_at	RABEP1	9135	rabaptin, RAB GTPase binding effector protein 1	39	37	37	37.7	36	31	34	33.6	36	39	40	38.7	39	58	57	50.3		-1.12	1	1	0.9604	0	0	0		1.3	0.4092	0	0	0
229789_at	TIGD3	220359	tigger transposable element derived 3	31	38	26	31.2	32	34	24	29.7	30	29	26	28.4	47	39	39	41.6		-1.05	1	-1.1	0.9519	0	0	0		1.3	0.3755	0	0	0
216350_s_at	ZNF10	7556	zinc finger protein 10	21	20	21	20.5	22	20	16	19.3	19	22	17	19.3	24	29	30	27.4		-1.06	1	-1.1	0.9451	0	0	0		1.3	0.176	0	0	0
218719_s_at	FLJ13912	64785	hypothetical protein FLJ13912	125	125	125	125	118	103	129	116.2	122	118	138	125.7	141	172	191	166.6		-1.08	1	1	0.9924	0	0	0		1.3	0.239	0	0	0
209778_at	TRIP11	9321	thyroid hormone receptor interactor 11	53	52	54	52.6	51	37	54	46.8	50	60	60	56.4	61	77	73	70.2		-1.12	1	1.1	0.9348	0	0	0		1.3	0.1587	0	0	0
238198_at				17	22	21	19.8	20	44	22	26.9	16	23	23	20.3	34	24	23	26.4		1.36	1	1	0.9876	0	0	0		1.3	0.4616	0	0	0
1561761_x_at			Full length insert cDNA clone YU26H08	14	15	15	14.7	16	16	16	16	17	17	16	16.7	21	18	20	19.6		1.09	1	1.1	0.7629	0	0	0		1.3	0.0974	0	0	0
212551_at	CAP2	10486	CAP, adenylate cyclase-associated protein, 2 (yeast)	132	150	164	147.9	134	149	158	146.7	169	166	169	167.8	188	197	207	197.2		-1.01	1	1.1	0.862	0	0	0		1.3	0.1533	0	0	0
215084_s_at	LRRC42	115353	leucine rich repeat containing 42	167	170	168	168.3	179	157	180	171.5	158	164	179	166.9	203	233	239	224.3		1.02	1	-1	0.9859	0	0	0		1.3	0.096	0	0	0
204475_at	MMP1	4312	matrix metallopeptidase 1 (interstitial collagenase)	16	13	14	14.5	14	15	13	14.2	15	14	15	14.6	18	19	21	19.4		-1.03	1	1	0.9948	0	0	0		1.3	0.1863	0	0	0
204944_at	PTPRG	5793	protein tyrosine phosphatase, receptor type, G	37	44	44	41.5	41	33	52	41.2	31	47	44	40	36	61	76	55.3		-1.01	1	-1	0.9856	0	0	0		1.3	0.6538	0	0	0
205880_at	PRKD1	5587	protein kinase D1	73	80	82	78.5	76	58	88	72.9	78	81	75	77.8	77	126	118	104.6		-1.08	1	-1	0.9872	0	0	0		1.3	0.4996	0	0	0
222769_at	FLJ12998	64779	hypothetical protein FLJ12998	38	42	43	41.1	35	41	40	38.7	41	42	42	41.8	58	62	45	54.7		-1.06	1	1	0.9749	0	0	0		1.3	0.3053	0	0	0
230660_at	SERTAD4	56256	SERTA domain containing 4	24	19	21	21.3	27	19	29	24.9	37	35	34	35.3	27	29	30	28.4		1.17	1	1.7	0.4138	0	0	0		1.3	0.1594	0	0	0
235587_at	LOC202781	202781	hypothetical protein LOC202781	56	66	70	63.7	62	38	60	51.9	65	56	67	62.3	62	95	104	84.8		-1.23	1	-1	0.9855	0	0	0		1.3	0.5356	0	0	0
222645_s_at	KCTD5	54442	potassium channel tetramerisation domain containing 5	51	44	48	47.5	45	58	56	52.8	42	48	49	45.9	58	72	61	63.3		1.11	1	-1	0.9703	0	0	0		1.3	0.2053	0	0	0
214721_x_at	CDC42EP4	23580	CDC42 effector protein (Rho GTPase binding) 4	168	187	179	177.8	189	179	185	184	194	201	215	203.1	214	240	259	236.9		1.03	1	1.1	0.7688	0	0	0		1.3	0.1407	0	0	0
219913_s_at	CRNKL1	51340	Crn, crooked neck-like 1 (Drosophila)	146	164	155	154.8	158	127	171	150.9	148	170	167	161.3	177	234	212	206.2		-1.03	1	1	0.9589	0	0	0		1.3	0.2432	0	0	0
201799_s_at	OSBP	5007	oxysterol binding protein	136	151	152	146.4	161	129	146	145.1	131	154	149	144.4	186	191	208	194.9		-1.01	1	-1	0.9865	0	0	0		1.3	0.092	0	0	0
223682_s_at	MGC11102	84285	hypothetical protein MGC11102	86	85	82	84.3	70	82	76	75.8	76	83	77	78.6	99	122	117	112.3		-1.11	1	-1.1	0.8546	0	0	0		1.3	0.1522	0	0	0
204140_at	TPST1	8460	tyrosylprotein sulfotransferase 1	46	48	52	48.7	49	44	51	47.5	40	50	44	44.1	53	68	75	64.8		-1.03	1	-1.1	0.9102	0	0	0		1.3	0.334	0	0	0
224281_s_at	NGRN	51335	neugrin, neurite outgrowth associated	487	544	548	525.4	530	509	557	531.6	544	547	585	558.3	669	706	725	699.4		1.01	1	1.1	0.9093	0	0	0		1.3	0.077	0	0	0
212747_at	ANKS1	23294	ankyrin repeat and sterile alpha motif domain containing 1	73	79	92	81	71	64	86	73.2	75	67	76	72.6	94	117	115	107.9		-1.11	1	-1.1	0.904	0	0	0		1.3	0.2745	0	0	0
222251_s_at	GMEB2	26205	glucocorticoid modulatory element binding protein 2	69	60	64	64	63	52	68	60.4	58	64	69	63.3	85	83	87	85.2		-1.06	1	-1	0.9894	0	0	0		1.3	0.07	0	0	0
222383_s_at	ALOXE3	59344	arachidonate lipoxygenase 3	12	12	13	12.4	12	11	11	11.3	14	12	12	12.4	16	16	18	16.5		-1.1	1	-1	0.9964	0	0	0		1.3	0.0658	0	0	0
226688_at	C3orf23	285343	chromosome 3 open reading frame 23	34	35	39	35.8	37	32	36	34.8	32	38	49	39.2	36	58	52	47.6		-1.03	1	1.1	0.9607	0	0	0		1.3	0.4768	0	0	0
215092_s_at	NFAT5	10725	nuclear factor of activated T-cells 5, tonicity-responsive	40	48	38	42.1	46	30	41	38.5	42	48	45	44.9	45	59	67	56.1		-1.09	1	1.1	0.9532	0	0	0		1.3	0.4278	0	0	0
220122_at	MCTP1	79772	multiple C2-domains with two transmembrane regions 1	27	24	27	25.7	33	19	26	25.3	29	34	28	30.3	22	48	39	34.2		-1.02	1	1.2	0.8466	0	0	0		1.3	0.6652	0	0	0
201377_at	UBAP2L	9898	ubiquitin associated protein 2-like	305	326	341	323.6	321	303	361	327.7	313	331	355	332.5	429	441	422	430.6		1.01	1	1	0.968	0	0	0		1.3	0.0502	0	0	0
225549_at	DDX6	1656	DEAD (Asp-Glu-Ala-Asp) box polypeptide 6	230	252	245	242.4	234	205	255	230.2	242	265	256	254	250	350	384	322.5		-1.05	1	1	0.9179	0	0	0		1.3	0.4152	0	0	0
239759_at			Transcribed locus, moderately similar to XP_512541.1 PREDICTED: similar to hypothetical protein [Pan troglodytes]	20	16	16	17.1	17	20	16	17.6	19	20	20	19.4	25	22	21	22.8		1.03	1	1.1	0.9028	0	0	0		1.3	0.2785	0	0	0
222604_at	GTF3C3	9330	general transcription factor IIIC, polypeptide 3, 102kDa	69	72	80	73.4	74	46	75	63.1	74	79	78	77	79	111	107	97.7		-1.16	1	1	0.9391	0	0	0		1.3	0.3593	0	0	0
[truncated: 52,677 more rows]

## Sheet: Table 3
Supplementary Table 3. Complete gene expression data for in vivo experiments. Note that a value of "1" indicates "Yes" while a value of "0" indicates "No" for columns W, X, Y, AC, AD, and AE. Criteria for signficance involve fold change (FC) ?1.5 and Benjamini-Hochberg corrected Students t-test<0.15 as described in the text.
Probe Set ID	Gene Symbol	Entrez Gene	Gene Title	Mannitol_a	Mannitol_b	Mannitol_c	Mannitol_d	GeoMean Mannitol	PCI_5002_a	PCI_5002_b	PCI_5002_c	PCI_5002_d	GeoMean PCI_5002	PCI_5003_a	PCI_5003_b	PCI_5003_c	PCI_5003_d	GeoMean PCI_5003		FC 5002/Control	B-H P(5002 Vs Control)	Significant?	Significant Up?	Significant Down?		FC 5003/Control	B-H P(5003 Vs Control)	Significant?	Significant Up?	Significant Down?
224840_at	FKBP5	2289	FK506 binding protein 5	116	109	104	101	107.1	195	185	174	143	173.1	190	264	209	236	222.9		1.6	0.1765	0	0	0		2.1	0.1227	1	1	0
241681_at	MBNL1	4154	Muscleblind-like (Drosophila)	74	68	64	64	67.6	121	121	114	135	122.6	156	144	152	110	139		1.8	0.0866	1	1	0		2.1	0.1227	1	1	0
217165_x_at	MT1F	4494	metallothionein 1F (functional)	147	164	165	199	167.8	298	287	292	317	298.4	354	331	268	296	310.3		1.8	0.1356	1	1	0		1.8	0.1399	1	1	0
228181_at	SLC30A1	7779	solute carrier family 30 (zinc transporter), member 1	48	44	40	47	44.8	149	100	97	91	107	77	76	92	70	78.4		2.4	0.1533	0	0	0		1.8	0.1343	1	1	0
212907_at	SLC30A1	7779	Solute carrier family 30 (zinc transporter), member 1	476	429	450	423	444.1	759	763	718	696	733.7	642	740	756	737	717.2		1.7	0.0741	1	1	0		1.6	0.1189	1	1	0
203124_s_at	SLC11A2	4891	solute carrier family 11 (proton-coupled divalent metal ion transporters), member 2	59	54	60	63	59	114	81	98	102	97.9	84	87	98	87	89		1.7	0.173	0	0	0		1.5	0.1227	1	1	0
204235_s_at	GULP1	51454	GULP, engulfment adaptor PTB domain containing 1	172	150	142	175	159	171	238	201	207	202.9	239	221	258	227	235.8		1.3	0.4198	0	0	0		1.5	0.1461	1	1	0
212847_at	FUBP1	8880	Far upstream element (FUSE) binding protein 1	37	34	33	35	34.4	46	54	47	48	48.7	48	52	56	48	50.8		1.4	0.1461	0	0	0		1.5	0.1227	1	1	0
226350_at	CHML	1122	choroideremia-like (Rab escort protein 2)	165	146	148	168	156.4	251	223	191	208	217.1	219	225	261	219	230.2		1.4	0.2375	0	0	0		1.5	0.1399	1	1	0
204560_at	FKBP5	2289	FK506 binding protein 5	20	19	18	17	18.5	29	24	23	19	23.6	28	28	26	28	27.2		1.3	0.4238	0	0	0		1.5	0.1222	1	1	0
206364_at	KIF14	9928	kinesin family member 14	116	106	119	129	117	139	131	125	144	134.4	162	183	178	161	170.8		1.1	0.4363	0	0	0		1.5	0.1396	1	1	0
213629_x_at	MT1F	4494	metallothionein 1F (functional)	81	92	100	89	90.3	152	168	187	142	161.5	217	180	137	162	171.7		1.8	0.1462	1	1	0		1.9	0.1571	0	0	0
240815_at	SEMA3C	10512	Sema domain, immunoglobulin domain (Ig), short basic domain, secreted, (semaphorin) 3C	41	47	37	46	42.3	75	64	51	59	61.7	73	92	90	54	75.4		1.5	0.3149	0	0	0		1.8	0.2206	0	0	0
208399_s_at	EDN3	1908	endothelin 3	27	21	19	21	21.6	30	33	28	27	29.3	35	40	34	42	37.7		1.4	0.347	0	0	0		1.7	0.157	0	0	0
214696_at	MGC14376	84981	hypothetical protein MGC14376	91	107	86	112	98.7	222	155	157	196	180.4	129	193	176	186	169.2		1.8	0.2014	0	0	0		1.7	0.1884	0	0	0
236007_at	AKAP10	11216	A kinase (PRKA) anchor protein 10	66	60	65	64	63.7	85	110	81	80	88.2	123	117	131	73	108.1		1.4	0.2953	0	0	0		1.7	0.2414	0	0	0
217683_at	HBE1	3046	Hemoglobin, epsilon 1	58	182	126	258	136.3	286	214	220	181	222.2	231	190	285	226	230.8		1.6	0.6656	0	0	0		1.7	0.5904	0	0	0
206461_x_at	MT1H	4496	metallothionein 1H	251	251	261	290	262.9	422	404	445	421	422.9	511	493	354	421	440		1.6	0.0866	1	1	0		1.7	0.1632	0	0	0
210993_s_at	SMAD1	4086	SMAD, mothers against DPP homolog 1 (Drosophila)	65	53	44	53	53.4	84	78	72	74	76.6	94	85	98	80	89.1		1.4	0.2997	0	0	0		1.7	0.1659	0	0	0
224856_at	FKBP5	2289	FK506 binding protein 5	59	53	52	44	51.8	83	75	69	58	70.8	80	100	70	97	86		1.4	0.374	0	0	0		1.7	0.1878	0	0	0
208581_x_at	MT1X	4501	metallothionein 1X	532	521	535	547	533.8	856	817	939	751	837.9	1177	1003	654	766	877		1.6	0.1296	1	1	0		1.6	0.2564	0	0	0
224959_at	SLC26A2	1836	solute carrier family 26 (sulfate transporter), member 2	142	138	121	164	140.5	256	187	210	211	214.6	208	263	202	233	225.2		1.5	0.247	0	0	0		1.6	0.1659	0	0	0
215906_at				23	23	21	22	22.3	22	23	22	27	23.1	26	105	24	23	35.3		1	0.8603	0	0	0		1.6	0.6794	0	0	0
204326_x_at	MT1X	4501	metallothionein 1X	363	352	441	455	400.4	554	592	675	463	565.7	820	705	448	582	623.3		1.4	0.365	0	0	0		1.6	0.3284	0	0	0
227148_at	PLEKHH2	130271	pleckstrin homology domain containing, family H (with MyTH4 domain) member 2	37	38	29	40	35.6	41	46	52	49	46.9	61	53	63	46	55.3		1.3	0.373	0	0	0		1.6	0.2049	0	0	0
210524_x_at				80	73	80	93	81.3	114	128	120	127	122.1	160	124	108	117	125.9		1.5	0.1554	0	0	0		1.5	0.2117	0	0	0
242052_at	BICD1	636	Bicaudal D homolog 1 (Drosophila)	76	67	70	102	77.8	81	106	87	102	93.3	148	118	124	94	119.6		1.2	0.6397	0	0	0		1.5	0.3101	0	0	0
222316_at	VDP	8615	Vesicle docking protein p115	14	14	13	14	13.6	17	22	18	18	18.8	26	20	24	16	20.9		1.4	0.2167	0	0	0		1.5	0.2568	0	0	0
211456_x_at	RPL35	11224	Similar to 60S ribosomal protein L35	337	389	373	430	380.9	570	527	573	542	552.7	719	636	478	536	584.9		1.5	0.1605	0	0	0		1.5	0.2253	0	0	0
212185_x_at	MT2A	4502	metallothionein 2A	900	985	1020	1043	985.5	1749	1628	1725	1493	1645.5	1920	1738	1164	1344	1511.5		1.7	0.1087	1	1	0		1.5	0.2689	0	0	0
242669_at	Ufm1	51569	Ubiquitin-fold modifier 1	22	31	25	27	26.1	52	56	38	43	46.7	41	40	48	32	39.6		1.8	0.2167	0	0	0		1.5	0.2375	0	0	0
225946_at	RASSF8	11228	Ras association (RalGDS/AF-6) domain family 8	34	46	35	41	38.8	52	63	55	47	53.9	50	68	70	51	59		1.4	0.3458	0	0	0		1.5	0.2633	0	0	0
222955_s_at	FAM45B /// FAM45A	404636 /// 55855	family with sequence similarity 45, member B /// family with sequence similarity 45, member A	88	91	86	82	86.9	129	119	102	104	112.8	136	149	143	104	131.7		1.3	0.2823	0	0	0		1.5	0.1865	0	0	0
227415_at	LOC283508	283508	hypothetical protein LOC283508	51	50	58	65	55.8	61	74	67	80	70.2	80	106	81	74	84.5		1.3	0.4401	0	0	0		1.5	0.2222	0	0	0
220296_at	GALNT10	55568	UDP-N-acetyl-alpha-D-galactosamine:polypeptide N-acetylgalactosaminyltransferase 10 (GalNAc-T10)	79	81	93	81	83.5	76	105	111	135	104.2	163	112	132	106	126.4		1.2	0.5998	0	0	0		1.5	0.2352	0	0	0
204516_at	ATXN7	6314	ataxin 7	80	65	77	74	73.7	109	118	115	115	114.4	103	120	123	101	111.5		1.6	0.1356	1	1	0		1.5	0.1571	0	0	0
230653_at			Transcribed locus	84	93	78	93	87.2	72	127	105	107	100.8	160	154	123	100	131.7		1.2	0.7417	0	0	0		1.5	0.2767	0	0	0
232338_at	ZNF431	170959	Zinc finger protein 431	23	21	24	29	24	37	36	28	25	31.3	32	42	44	29	36.2		1.3	0.4988	0	0	0		1.5	0.2982	0	0	0
1554878_a_at	ABCD3	5825	ATP-binding cassette, sub-family D (ALD), member 3	49	46	41	41	44	85	61	46	46	57.7	55	66	84	62	66.1		1.3	0.5998	0	0	0		1.5	0.2269	0	0	0
1555929_s_at			Transcribed locus	66	36	49	66	52.7	40	75	70	68	61.5	83	89	77	69	79.2		1.2	0.8444	0	0	0		1.5	0.3842	0	0	0
227769_at	GPR27	2850	G protein-coupled receptor 27	20	16	21	18	18.4	24	25	21	21	22.8	31	22	32	27	27.6		1.2	0.4111	0	0	0		1.5	0.2326	0	0	0
213562_s_at	SQLE	6713	squalene epoxidase	34	31	25	34	30.8	56	36	30	28	36	40	53	58	36	46		1.2	0.8035	0	0	0		1.5	0.3381	0	0	0
222044_at	C20orf67	63935	chromosome 20 open reading frame 67	18	24	23	22	21.7	44	35	31	39	37.1	31	35	34	30	32.3		1.7	0.1978	0	0	0		1.5	0.1632	0	0	0
204745_x_at	MT1G	4495	metallothionein 1G	209	225	210	233	219	330	311	339	292	317.3	403	352	262	304	326.1		1.4	0.1356	0	0	0		1.5	0.2267	0	0	0
235142_at	ZBTB8	127557	zinc finger and BTB domain containing 8	107	96	110	114	106.4	181	181	147	145	162.8	147	185	180	128	158.1		1.5	0.189	0	0	0		1.5	0.2236	0	0	0
205178_s_at	RBBP6	5930	retinoblastoma binding protein 6	152	151	160	158	155.2	193	233	177	211	202.5	253	265	216	194	230.5		1.3	0.2727	0	0	0		1.5	0.1659	0	0	0
1555241_at	C8orf59	401466	chromosome 8 open reading frame 59	33	31	29	30	30.7	45	41	37	37	39.9	39	51	53	41	45.6		1.3	0.2542	0	0	0		1.5	0.1943	0	0	0
221750_at	HMGCS1	3157	3-hydroxy-3-methylglutaryl-Coenzyme A synthase 1 (soluble)	77	65	82	77	74.8	152	123	119	112	125.7	105	104	128	108	110.9		1.7	0.1774	0	0	0		1.5	0.1659	0	0	0
225922_at	FLJ25371	152940	Hypothetical protein FLJ25371	46	43	46	53	47	60	71	58	64	63	60	80	77	61	69.1		1.3	0.2579	0	0	0		1.5	0.2144	0	0	0
211998_at	H3F3B	3021	H3 histone, family 3B (H3.3B)	113	110	92	104	104.4	200	159	145	165	166.1	123	209	151	142	153.3		1.6	0.1943	0	0	0		1.5	0.315	0	0	0
228955_at			Homo sapiens, clone IMAGE:4753714, mRNA	66	76	69	63	68.5	85	101	86	122	97.4	107	109	100	86	100.2		1.4	0.3311	0	0	0		1.5	0.1659	0	0	0
233369_at	SOS2	6655	Son of sevenless homolog 2 (Drosophila)	62	62	82	78	70.5	126	93	106	132	113	112	116	101	86	103.1		1.6	0.2796	0	0	0		1.5	0.2493	0	0	0
203453_at	SCNN1A	6337	sodium channel, nonvoltage-gated 1 alpha	38	21	29	26	28.1	40	35	36	26	33.7	42	43	37	43	41		1.2	0.7288	0	0	0		1.5	0.3255	0	0	0
226810_at			MRNA full length insert cDNA clone EUROIMAGE 1509279	41	34	33	38	36.4	81	55	58	68	65.1	44	59	60	51	53.1		1.8	0.189	0	0	0		1.5	0.2159	0	0	0
239794_at	IARS	3376	Isoleucine-tRNA synthetase	31	23	27	29	27.5	40	38	43	54	43.6	53	40	39	31	40.1		1.6	0.2582	0	0	0		1.5	0.3375	0	0	0
239404_at	TOP1	7150	Topoisomerase (DNA) I	33	38	30	33	33.4	28	42	43	41	38.1	60	55	47	36	48.6		1.1	0.7392	0	0	0		1.5	0.3255	0	0	0
230076_at	FLJ10156	54478	Family with sequence similarity 64, member A	33	26	26	23	26.5	31	29	30	39	32	37	42	35	40	38.4		1.2	0.5768	0	0	0		1.4	0.2117	0	0	0
225912_at	TP53INP1	94241	tumor protein p53 inducible nuclear protein 1	100	84	95	99	94.4	113	127	127	122	122.1	138	141	136	132	136.7		1.3	0.2167	0	0	0		1.4	0.1227	0	0	0
234975_at	GSPT1	2935	G1 to S phase transition 1	42	26	36	42	36	55	47	41	35	44	44	55	57	53	52.1		1.2	0.7012	0	0	0		1.4	0.352	0	0	0
1553749_at	FAM76B	143684	family with sequence similarity 76, member B	15	12	10	17	13.2	19	18	21	20	19.3	15	17	17	31	19.1		1.5	0.3985	0	0	0		1.4	0.5399	0	0	0
201865_x_at	NR3C1	2908	nuclear receptor subfamily 3, group C, member 1 (glucocorticoid receptor)	506	427	393	427	436.2	523	578	509	503	527.4	611	647	650	610	629.3		1.2	0.3984	0	0	0		1.4	0.1435	0	0	0
235513_at			Transcribed locus, moderately similar to XP_517655.1 PREDICTED: similar to KIAA0825 protein [Pan troglodytes]	28	29	29	35	30	36	40	44	45	41.2	55	40	46	35	43.2		1.4	0.2706	0	0	0		1.4	0.286	0	0	0
240798_at	CUTL1	1523	Cut-like 1, CCAAT displacement protein (Drosophila)	39	50	56	46	47.7	39	54	46	59	48.8	111	72	69	40	68.6		1	0.9673	0	0	0		1.4	0.5795	0	0	0
218088_s_at	RRAGC	64121	Ras-related GTP binding C	136	141	147	142	141.3	209	191	210	223	207.9	191	232	206	186	203		1.5	0.1038	1	1	0		1.4	0.1399	0	0	0
227793_at				42	39	39	48	41.7	49	48	55	47	49.6	51	62	68	60	59.9		1.2	0.4093	0	0	0		1.4	0.1934	0	0	0
227545_at	BARD1	580	BRCA1 associated RING domain 1	36	34	29	36	33.8	40	43	38	43	41	42	53	49	51	48.5		1.2	0.373	0	0	0		1.4	0.1878	0	0	0
226189_at			CDNA clone IMAGE:4794726	112	103	114	99	106.8	146	121	124	129	129.4	130	166	167	153	153.2		1.2	0.3439	0	0	0		1.4	0.1671	0	0	0
220576_at	PGAP1	80055	GPI deacylase	24	23	25	23	23.9	35	31	30	31	31.8	38	37	35	28	34.3		1.3	0.1554	0	0	0		1.4	0.1714	0	0	0
228468_at	MASTL	84930	microtubule associated serine/threonine kinase-like	38	45	45	56	45.5	64	60	62	47	57.9	56	56	80	72	65.1		1.3	0.5019	0	0	0		1.4	0.3319	0	0	0
204855_at	SERPINB5	5268	serpin peptidase inhibitor, clade B (ovalbumin), member 5	51	43	41	28	39.7	81	39	52	48	53.2	47	51	58	74	56.7		1.3	0.6678	0	0	0		1.4	0.4596	0	0	0
221484_at	B4GALT5	9334	UDP-Gal:betaGlcNAc beta 1,4- galactosyltransferase, polypeptide 5	374	305	377	332	345.5	405	420	481	517	453.6	502	511	511	451	493.3		1.3	0.341	0	0	0		1.4	0.1571	0	0	0
213164_at	SLC5A3	6526	solute carrier family 5 (inositol transporters), member 3	107	87	111	122	105.7	142	149	131	186	150.6	158	171	136	141	150.9		1.4	0.3585	0	0	0		1.4	0.2341	0	0	0
204146_at	RAD51AP1	10635	RAD51 associated protein 1	69	63	56	56	60.5	79	73	62	79	73.1	78	76	105	90	86.3		1.2	0.4712	0	0	0		1.4	0.2386	0	0	0
204633_s_at	RPS6KA5	9252	ribosomal protein S6 kinase, 90kDa, polypeptide 5	30	24	24	30	26.9	30	34	38	32	33.3	35	44	37	38	38.3		1.2	0.4596	0	0	0		1.4	0.2134	0	0	0
232874_at	DOCK9	23348	Dedicator of cytokinesis 9	16	24	16	19	18.6	21	23	24	37	25.4	31	35	27	17	26.5		1.4	0.5634	0	0	0		1.4	0.4999	0	0	0
207761_s_at	DKFZP586A0522	25840	DKFZP586A0522 protein	21	17	16	17	17.7	20	25	20	19	20.9	31	21	26	23	25		1.2	0.5774	0	0	0		1.4	0.306	0	0	0
214741_at	ZNF131	7690	zinc finger protein 131 (clone pHZ-10)	50	41	38	44	42.7	68	74	53	62	63.9	59	60	69	54	60.4		1.5	0.281	0	0	0		1.4	0.2093	0	0	0
1557522_x_at			CDNA clone IMAGE:5311184	22	22	20	19	20.8	31	29	30	32	30.5	33	30	27	28	29.5		1.5	0.1356	1	1	0		1.4	0.1571	0	0	0
223598_at	RAD23B	5887	RAD23 homolog B (S. cerevisiae)	196	164	170	175	175.6	302	269	261	254	271	213	265	262	254	247.6		1.5	0.1451	1	1	0		1.4	0.1659	0	0	0
230179_at	LOC285812	285812	hypothetical protein LOC285812	57	53	42	54	51.3	69	63	73	78	70.6	62	84	85	62	72.3		1.4	0.3118	0	0	0		1.4	0.3309	0	0	0
216064_s_at	AGA	175	aspartylglucosaminidase	73	65	58	64	64.8	85	69	69	45	65.4	82	97	92	94	91.1		1	0.9925	0	0	0		1.4	0.1589	0	0	0
203917_at	CXADR	1525	coxsackie virus and adenovirus receptor	303	220	264	286	266.4	385	404	338	320	360.3	389	346	398	366	373.9		1.4	0.36	0	0	0		1.4	0.2117	0	0	0
228454_at	MLR2	84458	ligand-dependent corepressor	112	88	91	91	94.9	109	137	129	157	131.9	133	145	131	124	133.2		1.4	0.3547	0	0	0		1.4	0.1734	0	0	0
225310_at	RBMX	27316	RNA binding motif protein, X-linked	368	355	365	345	357.9	417	426	372	445	414	469	520	510	511	502.1		1.2	0.3454	0	0	0		1.4	0.0906	0	0	0
210631_at	NF1	4763	neurofibromin 1 (neurofibromatosis, von Recklinghausen disease, Watson disease)	18	18	17	16	16.9	27	27	22	23	24.7	19	25	30	22	23.8		1.5	0.1784	0	0	0		1.4	0.2937	0	0	0
224200_s_at	RAD18	56852	RAD18 homolog (S. cerevisiae)	19	22	16	18	18.4	32	23	23	18	23.5	27	22	28	28	25.9		1.3	0.5977	0	0	0		1.4	0.2633	0	0	0
235925_at	TCF12	6938	Transcription factor 12 (HTF4, helix-loop-helix transcription factors 4)	98	90	93	113	97.9	105	142	136	149	132	138	158	141	116	137.3		1.3	0.3812	0	0	0		1.4	0.2261	0	0	0
215913_s_at	GULP1	51454	GULP, engulfment adaptor PTB domain containing 1	83	67	67	68	71.1	90	90	65	45	69.8	88	105	114	93	99.5		-1	0.9856	0	0	0		1.4	0.225	0	0	0
242361_at	IMMT	10989	Inner membrane protein, mitochondrial (mitofilin)	34	29	32	39	33.4	51	45	45	56	49	50	48	51	40	46.7		1.5	0.2596	0	0	0		1.4	0.2414	0	0	0
224367_at	BEX2	84707	brain expressed X-linked 2 /// brain expressed X-linked 2	23	20	20	23	21.6	35	31	29	26	30.3	29	28	35	29	30.1		1.4	0.265	0	0	0		1.4	0.1714	0	0	0
233609_at	PTPRK	5796	Protein tyrosine phosphatase, receptor type, K	20	22	19	17	19.5	21	26	29	21	23.8	29	23	36	23	27.2		1.2	0.5381	0	0	0		1.4	0.3562	0	0	0
239133_at	HSPC129	51496	CTD (carboxy-terminal domain, RNA polymerase II, polypeptide A) small phosphatase like 2	18	18	20	22	19.5	24	25	26	25	24.9	26	27	30	25	27.2		1.3	0.2579	0	0	0		1.4	0.1735	0	0	0
242443_at	EML5	161436	Echinoderm microtubule associated protein like 5	32	34	35	30	32.7	36	42	39	41	39.6	43	57	49	37	45.6		1.2	0.3108	0	0	0		1.4	0.2962	0	0	0
236916_at			Transcribed locus	19	15	17	18	17.1	24	22	18	22	21.4	24	24	22	25	23.8		1.3	0.3985	0	0	0		1.4	0.1571	0	0	0
242008_at	AGTPBP1	23287	ATP/GTP binding protein 1	51	51	54	57	53.1	86	80	81	98	85.9	79	80	74	64	74.1		1.6	0.1356	1	1	0		1.4	0.1632	0	0	0
226753_at	FAM76B	143684	family with sequence similarity 76, member B	62	45	47	57	52.2	69	72	58	68	66.3	69	74	77	71	72.8		1.3	0.4478	0	0	0		1.4	0.2265	0	0	0
208776_at	PSMD11	5717	proteasome (prosome, macropain) 26S subunit, non-ATPase, 11	56	61	45	58	54.9	84	65	59	60	66.1	67	91	78	72	76.5		1.2	0.6069	0	0	0		1.4	0.2707	0	0	0
226272_at			Full length insert cDNA clone ZD79H10	116	90	132	131	115.7	156	153	158	173	159.9	149	165	166	167	161.4		1.4	0.3561	0	0	0		1.4	0.2741	0	0	0
243509_at	BTG1	694	B-cell translocation gene 1, anti-proliferative	33	52	50	63	48.2	59	38	44	61	49.4	79	81	67	48	67.2		1	0.9801	0	0	0		1.4	0.5353	0	0	0
233506_at			CDNA: FLJ21531 fis, clone COL06036	44	47	43	49	45.6	80	74	69	84	76.5	59	69	68	59	63.5		1.7	0.1272	1	1	0		1.4	0.1447	0	0	0
202946_s_at	BTBD3	22903	BTB (POZ) domain containing 3	79	74	95	88	83.6	128	124	120	116	122.1	113	113	125	115	116.5		1.5	0.1765	0	0	0		1.4	0.1659	0	0	0
227936_at	TMEM68	137695	transmembrane protein 68	38	40	36	41	38.8	66	57	47	51	54.8	48	52	64	53	54		1.4	0.2796	0	0	0		1.4	0.1878	0	0	0
202126_at	PRPF4B	8899	PRP4 pre-mRNA processing factor 4 homolog B (yeast)	192	174	187	211	190.6	235	217	236	240	231.8	245	236	305	282	265.6		1.2	0.2952	0	0	0		1.4	0.2049	0	0	0
211671_s_at	NR3C1	2908	nuclear receptor subfamily 3, group C, member 1 (glucocorticoid receptor) /// nuclear receptor subfamily 3, group C, member 1 (glucocorticoid receptor)	399	350	337	338	355.3	395	480	403	378	412.2	465	502	525	489	494.7		1.2	0.5098	0	0	0		1.4	0.1399	0	0	0
211985_s_at	CALM1	801	calmodulin 1 (phosphorylase kinase, delta)	161	132	140	141	143	192	180	162	157	172.2	168	215	218	199	198.9		1.2	0.4056	0	0	0		1.4	0.2096	0	0	0
217465_at				26	17	17	27	21.2	28	25	28	24	26.3	22	28	33	39	29.5		1.2	0.6258	0	0	0		1.4	0.529	0	0	0
226886_at			Clone 114 tumor rejection antigen	75	56	62	90	69.6	110	114	119	90	107.7	108	87	108	86	96.7		1.5	0.3459	0	0	0		1.4	0.3786	0	0	0
1559214_at				33	32	28	34	31.5	40	40	47	48	43.4	41	47	50	38	43.6		1.4	0.2335	0	0	0		1.4	0.2134	0	0	0
213549_at	SLC18A2	6571	Solute carrier family 18 (vesicular monoamine), member 2	179	149	153	155	158.8	217	219	202	200	209.4	196	235	238	214	220.1		1.3	0.1931	0	0	0		1.4	0.1686	0	0	0
204128_s_at	RFC3	5983	replication factor C (activator 1) 3, 38kDa	45	42	39	38	40.8	59	50	37	31	42.8	50	55	62	60	56.6		1	0.9498	0	0	0		1.4	0.1788	0	0	0
223062_s_at	PSAT1	29968	phosphoserine aminotransferase 1	120	100	107	110	109	133	155	149	158	148.6	136	136	185	153	151		1.4	0.1968	0	0	0		1.4	0.2386	0	0	0
230764_at	C9orf5	23731	Chromosome 9 open reading frame 5	17	15	16	17	16.4	27	23	25	25	24.9	21	26	26	18	22.6		1.5	0.1038	1	1	0		1.4	0.2743	0	0	0
208804_s_at	SFRS6	6431	splicing factor, arginine/serine-rich 6	427	442	402	380	411.8	540	577	442	554	525.5	629	622	578	467	570.2		1.3	0.3398	0	0	0		1.4	0.2197	0	0	0
241786_at	PPP3R1	5534	Protein phosphatase 3 (formerly 2B), regulatory subunit B, 19kDa, alpha isoform (calcineurin B, type I)	65	54	67	74	64.6	124	96	98	98	103.5	89	99	102	72	89.5		1.6	0.2216	0	0	0		1.4	0.321	0	0	0
205251_at	PER2	8864	period homolog 2 (Drosophila)	338	211	290	281	276.2	309	399	319	315	333.5	396	332	387	419	382.2		1.2	0.6287	0	0	0		1.4	0.3388	0	0	0
219736_at	TRIM36	55521	tripartite motif-containing 36	16	16	14	15	15	23	24	21	25	23.2	18	20	26	20	20.7		1.6	0.1356	1	1	0		1.4	0.2341	0	0	0
216899_s_at	SCAP2	8935	src family associated phosphoprotein 2	74	53	56	74	63.4	80	75	60	57	67.3	75	88	98	92	87.8		1.1	0.9112	0	0	0		1.4	0.332	0	0	0
236224_at	RIT1	6016	Ras-like without CAAX 1	76	72	65	74	71.5	149	99	69	56	86.6	91	105	113	89	98.8		1.2	0.8138	0	0	0		1.4	0.1932	0	0	0
208881_x_at	IDI1	3422	isopentenyl-diphosphate delta isomerase 1	200	200	202	197	199.6	308	252	235	234	255.6	282	264	269	288	275.7		1.3	0.3174	0	0	0		1.4	0.0577	0	0	0
229128_s_at	ANP32E	81611	Acidic (leucine-rich) nuclear phosphoprotein 32 family, member E	265	205	206	228	224.7	400	302	219	144	248.6	218	339	357	350	310.2		1.1	0.9188	0	0	0		1.4	0.4129	0	0	0
217572_at			Transcribed locus, strongly similar to NP_032244.1 hemoglobin alpha 1 chain [Mus musculus]	44	112	92	159	92	166	128	111	98	123.3	124	119	152	116	127		1.3	0.7834	0	0	0		1.4	0.7091	0	0	0
217833_at	SYNCRIP	10492	synaptotagmin binding, cytoplasmic RNA interacting protein	138	132	118	137	131	192	186	145	204	180.3	154	208	194	171	180.6		1.4	0.322	0	0	0		1.4	0.2189	0	0	0
236168_at	ACSL3	2181	Acyl-CoA synthetase long-chain family member 3	33	30	37	42	35.2	59	51	50	51	52.4	49	47	49	48	48.4		1.5	0.2221	0	0	0		1.4	0.2027	0	0	0
212989_at	TMEM23	259230	transmembrane protein 23	215	152	150	206	178.5	237	247	229	236	237.3	188	279	276	251	245.6		1.3	0.4125	0	0	0		1.4	0.4208	0	0	0
226775_at	ENY2	56943	enhancer of yellow 2 homolog (Drosophila)	113	95	100	96	100.7	153	131	118	131	132.6	115	139	146	157	138.5		1.3	0.3003	0	0	0		1.4	0.2269	0	0	0
219587_at	TTC12	54970	tetratricopeptide repeat domain 12	41	32	40	33	36.5	51	46	48	44	47.1	49	48	55	48	50.1		1.3	0.341	0	0	0		1.4	0.2101	0	0	0
208866_at	CSNK1A1	1452	casein kinase 1, alpha 1	117	94	96	101	101.6	158	126	120	127	131.8	144	147	158	113	139.5		1.3	0.3712	0	0	0		1.4	0.2689	0	0	0
229287_at			Full-length cDNA clone CS0DK010YA20 of HeLa cells Cot 25-normalized of Homo sapiens (human)	33	38	38	33	35.1	42	39	37	41	39.6	46	52	49	46	48.2		1.1	0.4823	0	0	0		1.4	0.1571	0	0	0
237183_at				24	25	23	18	22.1	20	27	25	24	23.7	33	34	30	25	30.3		1.1	0.8401	0	0	0		1.4	0.3043	0	0	0
213793_s_at	HOMER1	9456	homer homolog 1 (Drosophila)	40	38	49	61	46	61	66	64	70	65.2	57	62	74	60	63.1		1.4	0.3947	0	0	0		1.4	0.3903	0	0	0
1554678_s_at	HNRPDL	9987	heterogeneous nuclear ribonucleoprotein D-like	254	224	248	226	237.9	325	263	279	241	275.2	262	347	355	350	326		1.2	0.5442	0	0	0		1.4	0.2362	0	0	0
208962_s_at	FADS1	3992	fatty acid desaturase 1	233	308	226	252	252.9	328	387	327	374	352.9	351	373	369	297	346.1		1.4	0.3003	0	0	0		1.4	0.2685	0	0	0
224718_at	YY1	7528	YY1 transcription factor	101	103	102	114	104.8	126	146	163	209	158.5	150	155	127	141	143.3		1.5	0.3296	0	0	0		1.4	0.1571	0	0	0
232071_at	C2orf3	6936	Chromosome 2 open reading frame 3	24	24	22	25	23.8	33	35	39	33	34.8	34	31	37	29	32.5		1.5	0.1654	0	0	0		1.4	0.1773	0	0	0
236488_s_at			CDNA FLJ36309 fis, clone THYMU2004986	88	67	78	89	80	94	89	90	83	88.9	103	108	128	100	109.4		1.1	0.6594	0	0	0		1.4	0.2621	0	0	0
213605_s_at	C6orf216	375513 /// 402223	Glucuronidase, beta-like 1 /// Glucuronidase, beta-like 2	108	70	95	99	92	102	119	112	138	117	120	142	137	106	125.6		1.3	0.5358	0	0	0		1.4	0.372	0	0	0
234969_s_at	EPC1	80314	enhancer of polycomb homolog 1 (Drosophila)	223	192	241	227	219.8	287	356	271	270	294	294	342	302	267	300		1.3	0.3388	0	0	0		1.4	0.2117	0	0	0
226844_at	MOBKL2B	79817	MOB1, Mps One Binder kinase activator-like 2B (yeast)	60	52	44	46	50.2	64	60	62	58	60.9	63	72	70	69	68.5		1.2	0.437	0	0	0		1.4	0.2218	0	0	0
242550_at	EIF3S9	8662	eukaryotic translation initiation factor 3, subunit 9 eta, 116kDa	36	40	45	39	39.8	63	48	53	47	52.6	75	48	56	43	54.3		1.3	0.3506	0	0	0		1.4	0.4202	0	0	0
226905_at	MGC45871	359845	hypothetical protein MGC45871	37	33	34	35	34.9	40	41	42	63	45.7	48	46	46	50	47.5		1.3	0.4727	0	0	0		1.4	0.1189	0	0	0
229483_at	UBE2H	7328	Ubiquitin-conjugating enzyme E2H (UBC8 homolog, yeast)	89	84	80	98	87.5	99	96	117	128	109.3	151	121	117	94	119.2		1.2	0.432	0	0	0		1.4	0.3396	0	0	0
238039_at			Full length insert cDNA clone ZD88B10	45	49	43	47	45.8	57	63	55	44	54.3	64	63	60	64	62.4		1.2	0.552	0	0	0		1.4	0.1222	0	0	0
214724_at	DIXDC1	85458	DIX domain containing 1	92	108	87	126	102.5	165	117	115	140	132.9	126	188	145	110	139.5		1.3	0.5212	0	0	0		1.4	0.4588	0	0	0
218127_at	NFYB	4801	nuclear transcription factor Y, beta	84	68	72	77	75	92	101	82	72	86	94	94	111	110	102.1		1.1	0.6463	0	0	0		1.4	0.2072	0	0	0
218360_at	RAB22A	57403	RAB22A, member RAS oncogene family	88	106	84	91	91.9	113	103	100	114	107.4	122	127	123	128	125		1.2	0.4656	0	0	0		1.4	0.1613	0	0	0
226106_at	RNF141	50862	ring finger protein 141	160	132	132	150	143	182	181	172	152	171.3	185	174	213	208	194.5		1.2	0.423	0	0	0		1.4	0.2049	0	0	0
205345_at	BARD1	580	BRCA1 associated RING domain 1	97	98	104	84	95.6	118	131	111	110	117.5	126	139	137	118	130		1.2	0.3587	0	0	0		1.4	0.1734	0	0	0
202759_s_at	PALM2-AKAP2	445815	PALM2-AKAP2 protein	63	73	76	76	71.7	130	101	101	94	105.8	97	97	113	86	97.5		1.5	0.2502	0	0	0		1.4	0.2184	0	0	0
231240_at	DIO2	1734	Deiodinase, iodothyronine, type II	61	45	35	42	45.2	43	54	32	20	35.1	53	64	58	71	61.4		-1.3	0.7693	0	0	0		1.4	0.4287	0	0	0
212741_at	MAOA	4128	monoamine oxidase A	152	127	112	122	127.4	152	149	153	147	150	169	172	160	193	173		1.2	0.4729	0	0	0		1.4	0.2324	0	0	0
232528_at	UBE2E3	10477	Ubiquitin-conjugating enzyme E2E 3 (UBC4/5 homolog, yeast)	68	73	61	56	64.2	85	78	71	94	81.4	84	98	95	74	87.2		1.3	0.425	0	0	0		1.4	0.2764	0	0	0
228106_at	FLJ20280	54876	hypothetical protein FLJ20280	33	29	28	34	30.8	42	34	37	46	39.5	40	41	57	33	41.8		1.3	0.4093	0	0	0		1.4	0.4142	0	0	0
242366_at			Homo sapiens, clone IMAGE:3858719, mRNA	40	36	47	38	39.8	53	56	42	48	49.5	48	58	54	56	54		1.2	0.4494	0	0	0		1.4	0.2133	0	0	0
218129_s_at	NFYB	4801	nuclear transcription factor Y, beta	45	39	43	40	41.7	55	47	42	31	42.8	52	53	70	53	56.5		1	0.9658	0	0	0		1.4	0.2363	0	0	0
203924_at	GSTA1	2938	glutathione S-transferase A1	309	90	154	140	156.6	153	249	205	77	156.3	229	142	280	223	212.2		-1	0.9994	0	0	0		1.4	0.7405	0	0	0
209238_at	STX3A	6809	syntaxin 3A	76	54	67	71	66.7	109	86	89	81	90.7	88	96	95	83	90.3		1.4	0.39	0	0	0		1.4	0.256	0	0	0
226280_at	BNIP2	663	BCL2/adenovirus E1B 19kDa interacting protein 2	90	92	81	102	90.9	117	105	97	118	108.7	122	129	111	132	123.1		1.2	0.4487	0	0	0		1.4	0.1878	0	0	0
225731_at	KIAA1223	57182	KIAA1223 protein	126	114	114	128	120.4	158	157	146	170	157.6	185	161	165	143	163		1.3	0.1803	0	0	0		1.4	0.1858	0	0	0
221685_s_at	FLJ20364	54908	hypothetical protein FLJ20364	212	192	215	210	206.9	251	212	221	255	234.3	271	288	268	294	280.1		1.1	0.4932	0	0	0		1.4	0.1227	0	0	0
229797_at	MCOLN3	55283	mucolipin 3	58	59	66	61	60.7	76	71	80	79	76.3	73	87	90	80	82.1		1.3	0.1919	0	0	0		1.4	0.1659	0	0	0
222759_at	SUV420H1	51111	suppressor of variegation 4-20 homolog 1 (Drosophila)	52	58	44	54	51.8	82	80	76	91	82.2	61	73	78	69	70.2		1.6	0.1717	0	0	0		1.4	0.241	0	0	0
220235_s_at	C1orf103	55791	chromosome 1 open reading frame 103	59	50	48	55	53	62	72	83	68	70.7	62	72	73	82	71.8		1.3	0.3355	0	0	0		1.4	0.2296	0	0	0
233300_at			CDNA FLJ11548 fis, clone HEMBA1002944	158	160	174	160	163.1	189	221	199	211	204.7	243	235	238	174	220.5		1.3	0.1993	0	0	0		1.4	0.2628	0	0	0
229319_at			CDNA FLJ34311 fis, clone FEBRA2008255	27	23	28	29	26.6	32	36	29	32	32.5	41	37	33	34	35.9		1.2	0.3984	0	0	0		1.4	0.2139	0	0	0
204520_x_at	BRD1	23774	bromodomain containing 1	44	40	47	46	44.1	46	48	52	52	49.7	63	63	56	57	59.6		1.1	0.471	0	0	0		1.4	0.1556	0	0	0
207746_at	POLQ	10721	polymerase (DNA directed), theta	34	35	41	34	35.6	47	41	40	41	42.2	54	53	41	45	48.1		1.2	0.4056	0	0	0		1.4	0.2521	0	0	0
201197_at	AMD1	262	adenosylmethionine decarboxylase 1	210	170	204	207	196.7	255	263	264	266	262	242	285	267	270	265.5		1.3	0.1978	0	0	0		1.4	0.186	0	0	0
237043_at			Transcribed locus	23	28	21	21	23.2	30	29	34	37	32.3	29	33	33	31	31.4		1.4	0.3285	0	0	0		1.3	0.2336	0	0	0
201143_s_at	EIF2S1	1965	eukaryotic translation initiation factor 2, subunit 1 alpha, 35kDa	118	134	130	131	128.3	209	221	186	182	198.7	155	183	180	175	173		1.5	0.1451	1	1	0		1.3	0.146	0	0	0
226374_at			Full-length cDNA clone CS0DF012YG01 of Fetal brain of Homo sapiens (human)	208	148	174	191	178.9	261	287	239	230	253.3	197	231	275	271	241.3		1.4	0.3062	0	0	0		1.3	0.3596	0	0	0
202909_at	EPM2AIP1	9852	EPM2A (laforin) interacting protein 1	185	184	179	199	186.8	226	241	236	234	234.4	283	240	273	217	251.8		1.3	0.1356	0	0	0		1.3	0.2049	0	0	0
230352_at	PRPS2	5634	Phosphoribosyl pyrophosphate synthetase 2	155	141	142	151	147	212	192	148	96	155.3	167	210	194	226	198.1		1.1	0.9481	0	0	0		1.3	0.2139	0	0	0
225007_at	G3BP	10146	Ras-GTPase-activating protein SH3-domain-binding protein	210	212	216	202	209.9	304	280	226	303	276.4	293	297	298	247	282.9		1.3	0.3142	0	0	0		1.3	0.1508	0	0	0
244659_at	TRIP12	9320	Thyroid hormone receptor interactor 12	24	23	29	22	24.4	34	30	31	26	30	30	32	39	31	32.9		1.2	0.4729	0	0	0		1.3	0.2659	0	0	0
1569320_at	SP192	60313	GC-rich promoter binding protein 1-like 1	41	32	41	47	39.7	61	49	43	39	47.4	50	61	59	46	53.5		1.2	0.6799	0	0	0		1.3	0.36	0	0	0
212749_s_at	RCHY1	25898	ring finger and CHY zinc finger domain containing 1	59	52	44	62	53.8	80	68	73	63	70.8	66	76	81	68	72.4		1.3	0.4042	0	0	0		1.3	0.3017	0	0	0
232312_at	SAPS3	55291	SAPS domain family, member 3	27	31	27	29	28.4	33	33	34	39	34.8	39	41	42	32	38.2		1.2	0.3103	0	0	0		1.3	0.2117	0	0	0
226460_at	KIAA1450	57600	KIAA1450 protein	41	40	38	40	39.7	58	62	50	48	54.5	51	64	62	40	53.4		1.4	0.2167	0	0	0		1.3	0.3732	0	0	0
228255_at	ALS2CR4	65062	amyotrophic lateral sclerosis 2 (juvenile) chromosome region, candidate 4	29	29	29	24	27.8	35	34	33	35	34.3	33	38	43	36	37.4		1.2	0.3214	0	0	0		1.3	0.2565	0	0	0
212049_at	WIRE	147179	WIRE protein	124	139	118	122	125.4	142	159	155	185	159.8	188	173	166	150	168.6		1.3	0.3332	0	0	0		1.3	0.1835	0	0	0
238880_at	GTF3A	2971	general transcription factor IIIA	44	57	54	48	50.4	60	73	61	72	66.3	75	76	63	59	67.8		1.3	0.3454	0	0	0		1.3	0.2735	0	0	0
212599_at	AUTS2	26053	autism susceptibility candidate 2	36	36	37	31	35.1	43	42	41	32	39.6	43	50	53	43	47.1		1.1	0.6407	0	0	0		1.3	0.2049	0	0	0
225893_at			Clone TESTIS-724 mRNA sequence	151	151	171	172	160.9	219	223	202	215	214.8	224	235	222	187	216.1		1.3	0.1702	0	0	0		1.3	0.1943	0	0	0
214093_s_at	FUBP1	8880	far upstream element (FUSE) binding protein 1	108	63	90	100	88.2	106	103	124	94	106	102	123	121	130	118.5		1.2	0.6846	0	0	0		1.3	0.4455	0	0	0
229083_at	HNRPA0	10949	Heterogeneous nuclear ribonucleoprotein A0	67	63	67	72	67.4	94	96	88	85	90.6	81	86	86	112	90.6		1.3	0.1524	0	0	0		1.3	0.2493	0	0	0
1565689_at	KPNA3	3839	Karyopherin alpha 3 (importin alpha 4)	25	31	27	35	29.2	34	36	35	41	36.4	38	45	39	36	39.2		1.2	0.4727	0	0	0		1.3	0.3049	0	0	0
235328_at	PLXNC1	10154	Plexin C1	22	20	19	22	20.8	18	28	21	30	23.6	36	32	21	25	27.8		1.1	0.7814	0	0	0		1.3	0.4279	0	0	0
226444_at	SLC39A10	57181	Solute carrier family 39 (zinc transporter), member 10	56	57	58	66	59.3	67	80	98	87	82.2	70	74	88	87	79.5		1.4	0.3345	0	0	0		1.3	0.2221	0	0	0
202532_s_at	DHFR	1719	dihydrofolate reductase	79	81	89	69	79	81	108	83	78	86.9	109	104	124	89	105.8		1.1	0.7713	0	0	0		1.3	0.2959	0	0	0
220892_s_at	PSAT1	29968	phosphoserine aminotransferase 1	46	42	49	39	43.8	51	55	51	41	49.3	42	61	72	64	58.7		1.1	0.6693	0	0	0		1.3	0.4323	0	0	0
241775_at	SCFD1	23256	Sec1 family domain containing 1	42	45	43	41	42.7	65	68	52	55	59.8	63	56	57	53	57.1		1.4	0.2221	0	0	0		1.3	0.1409	0	0	0
227004_at	CDKL5	6792	Cyclin-dependent kinase-like 5	35	39	35	39	36.9	55	42	59	52	51.7	47	50	57	44	49.5		1.4	0.2823	0	0	0		1.3	0.1954	0	0	0
236924_at	GLMN	11146	Glomulin, FKBP associated protein	21	19	21	20	20	28	25	22	21	23.6	23	27	34	24	26.8		1.2	0.4956	0	0	0		1.3	0.3136	0	0	0
232565_at	RAB6IP2	23085	RAB6 interacting protein 2	27	36	35	30	31.5	36	45	32	36	36.9	46	50	44	31	42.2		1.2	0.638	0	0	0		1.3	0.4369	0	0	0
222344_at	C5orf13	9315	Chromosome 5 open reading frame 13	15	14	14	14	14.2	17	17	18	19	17.8	15	22	18	23	19		1.3	0.1717	0	0	0		1.3	0.3586	0	0	0
224894_at	YAP1	10413	Yes-associated protein 1, 65kDa	245	172	219	267	222.8	291	264	235	233	254.7	276	298	322	297	298		1.1	0.7258	0	0	0		1.3	0.3454	0	0	0
216336_x_at	MT1K	4499	Metallothionein 1M	113	101	104	113	107.3	143	129	146	136	138.3	177	152	114	137	143.4		1.3	0.1765	0	0	0		1.3	0.3301	0	0	0
213546_at	DKFZp586I1420	222161	hypothetical protein DKFZp586I1420	105	86	100	96	96.6	113	128	124	126	122.7	141	142	119	116	129		1.3	0.25	0	0	0		1.3	0.2249	0	0	0
220238_s_at	KLHL7	55975	kelch-like 7 (Drosophila)	16	16	13	16	15.1	28	21	17	17	20.4	13	20	32	20	20.1		1.4	0.5099	0	0	0		1.3	0.6153	0	0	0
219820_at	SLC6A16	28968	solute carrier family 6, member 16	49	74	52	49	54.8	54	57	49	74	58	77	97	61	62	73.1		1.1	0.9223	0	0	0		1.3	0.504	0	0	0
209780_at	PHTF2	57157	putative homeodomain transcription factor 2	51	35	44	47	43.8	53	52	52	53	52.3	66	50	65	55	58.4		1.2	0.5297	0	0	0		1.3	0.3668	0	0	0
224720_at	MIB1	57534	mindbomb homolog 1 (Drosophila)	113	94	104	108	104.6	149	140	123	119	132.2	119	135	157	150	139.6		1.3	0.3437	0	0	0		1.3	0.2399	0	0	0
214963_at	NUP160	23279	nucleoporin 160kDa	25	22	24	22	23.2	39	37	35	30	34.9	27	34	33	31	30.9		1.5	0.1877	0	0	0		1.3	0.1878	0	0	0
1554171_at	ZNF261	9203	zinc finger protein 261	26	22	23	24	24	37	32	35	32	34.2	30	28	33	37	32		1.4	0.1533	0	0	0		1.3	0.2139	0	0	0
223712_at	PCBD2	84105	6-pyruvoyl-tetrahydropterin synthase/dimerization cofactor of hepatocyte nuclear factor 1 alpha (TCF1) 2	42	30	37	41	37.1	42	39	53	43	44.2	52	49	55	42	49.4		1.2	0.6181	0	0	0		1.3	0.3439	0	0	0
230454_at	ALS2CR15	130026	amyotrophic lateral sclerosis 2 (juvenile) chromosome region, candidate 15	38	35	31	32	33.9	42	44	35	44	41.2	43	41	52	46	45.2		1.2	0.4491	0	0	0		1.3	0.2222	0	0	0
238735_at	TCF12	6938	Transcription factor 12 (HTF4, helix-loop-helix transcription factors 4)	16	12	11	15	13.2	14	15	15	16	14.8	15	22	20	14	17.6		1.1	0.7523	0	0	0		1.3	0.491	0	0	0
203180_at	ALDH1A3	220	aldehyde dehydrogenase 1 family, member A3	41	49	43	42	43.9	56	53	47	53	52	57	60	54	61	58.4		1.2	0.3984	0	0	0		1.3	0.1585	0	0	0
1556105_at	PARD3	56288	Par-3 partitioning defective 3 homolog (C. elegans)	61	48	71	54	57.7	58	67	74	63	65.5	66	72	93	78	76.8		1.1	0.7091	0	0	0		1.3	0.3952	0	0	0
215506_s_at	DIRAS3	9077	DIRAS family, GTP-binding RAS-like 3	58	40	46	31	42.8	67	59	53	34	51.6	48	56	75	53	56.9		1.2	0.7958	0	0	0		1.3	0.5517	0	0	0
227642_at	TFCP2L1	29842	Transcription factor CP2-like 1	75	78	65	79	74.1	70	93	78	91	82.4	104	102	94	94	98.6		1.1	0.6946	0	0	0		1.3	0.1632	0	0	0
210156_s_at	PCMT1	5110	protein-L-isoaspartate (D-aspartate) O-methyltransferase	188	171	165	210	182.5	251	195	207	190	209.3	215	247	266	246	242.8		1.1	0.6286	0	0	0		1.3	0.228	0	0	0
202558_s_at	STCH	6782	stress 70 protein chaperone, microsome-associated, 60kDa	45	39	35	45	40.8	77	52	46	51	55.2	45	50	67	57	54.2		1.4	0.4974	0	0	0		1.3	0.3763	0	0	0
212921_at	SMYD2	56950	SET and MYND domain containing 2	38	44	37	47	41.4	58	58	48	56	54.6	55	57	60	50	55.1		1.3	0.3369	0	0	0		1.3	0.2336	0	0	0
243591_at	LAMC1	3915	Laminin, gamma 1 (formerly LAMB2)	45	39	37	49	41.9	59	53	50	64	56.1	61	58	55	50	55.8		1.3	0.3703	0	0	0		1.3	0.2648	0	0	0
213822_s_at	UBE3B	89910	ubiquitin protein ligase E3B	44	46	42	52	45.7	78	71	66	58	67.7	49	64	64	67	60.8		1.5	0.2181	0	0	0		1.3	0.291	0	0	0
203261_at	DCTN6	10671	dynactin 6	263	245	243	272	255.8	317	296	256	242	276.1	337	341	336	345	339.7		1.1	0.7478	0	0	0		1.3	0.1205	0	0	0
223443_s_at	FLJ32065	201283	hypothetical protein FLJ32065	57	58	48	49	52.5	70	68	69	60	66.6	67	70	78	65	69.7		1.3	0.321	0	0	0		1.3	0.2117	0	0	0
1553764_a_at	JUB	84962	jub, ajuba homolog (Xenopus laevis)	114	77	105	104	99.1	83	103	105	88	94.6	131	118	142	136	131.6		-1	0.9184	0	0	0		1.3	0.3317	0	0	0
212751_at	UBE2N	7334	ubiquitin-conjugating enzyme E2N (UBC13 homolog, yeast)	94	84	83	85	86.4	112	96	94	99	100.1	108	112	126	113	114.6		1.2	0.3992	0	0	0		1.3	0.146	0	0	0
206343_s_at	NRG1	3084	neuregulin 1	130	130	144	163	141.2	298	221	262	241	253.8	181	198	205	167	187.3		1.8	0.1554	0	0	0		1.3	0.2338	0	0	0
226750_at	LARP2	55132	La ribonucleoprotein domain family, member 2	21	23	18	26	22	36	31	25	30	30.3	29	28	32	28	29.2		1.4	0.3873	0	0	0		1.3	0.2628	0	0	0
223515_s_at	COQ3	51805	coenzyme Q3 homolog, methyltransferase (yeast)	97	71	83	81	82.4	106	100	94	84	95.8	111	109	122	97	109.3		1.2	0.5855	0	0	0		1.3	0.2701	0	0	0
206898_at	CDH19	28513	cadherin 19, type 2	99	89	86	81	88.8	124	97	96	94	102.2	99	112	154	113	117.8		1.2	0.591	0	0	0		1.3	0.3649	0	0	0
209105_at	NCOA1	8648	nuclear receptor coactivator 1	25	23	20	27	23.7	28	27	28	24	26.8	29	29	36	32	31.4		1.1	0.6241	0	0	0		1.3	0.2947	0	0	0
227410_at	FAM43A	131583	family with sequence similarity 43, member A	43	50	53	58	50.9	94	73	66	61	72.4	62	79	67	62	67.5		1.4	0.3963	0	0	0		1.3	0.3017	0	0	0
218857_s_at	ASRGL1	80150	asparaginase like 1	367	187	242	219	245.6	277	339	296	144	251.5	334	272	381	324	325.4		1	0.9859	0	0	0		1.3	0.5501	0	0	0
225198_at	VAPA	9218	VAMP (vesicle-associated membrane protein)-associated protein A, 33kDa	144	110	121	119	122.8	178	169	153	163	165.4	140	163	190	162	162.6		1.3	0.2582	0	0	0		1.3	0.2994	0	0	0
220239_at	KLHL7	55975	kelch-like 7 (Drosophila)	62	58	60	59	59.8	113	87	80	70	86.2	72	75	91	80	79.1		1.4	0.3383	0	0	0		1.3	0.1686	0	0	0
209430_at	BTAF1	9044	BTAF1 RNA polymerase II, B-TFIID transcription factor-associated, 170kDa (Mot1 homolog, S. cerevisiae)	107	92	96	114	101.9	119	118	125	104	116.2	145	136	138	123	135		1.1	0.5385	0	0	0		1.3	0.1996	0	0	0
205571_at	LIPT1	51601	lipoyltransferase 1	53	48	51	59	52.8	67	59	53	51	57.2	79	72	70	60	69.9		1.1	0.7739	0	0	0		1.3	0.2526	0	0	0
229794_at	ZNF585A	199704	zinc finger protein 585A	25	25	17	28	23.3	23	27	26	25	25.3	35	31	25	32	30.8		1.1	0.8402	0	0	0		1.3	0.458	0	0	0
1559232_a_at	SLC33A1	9197	Solute carrier family 33 (acetyl-CoA transporter), member 1	21	23	31	28	25.4	35	40	31	31	34	36	29	34	36	33.6		1.3	0.4439	0	0	0		1.3	0.3797	0	0	0
239283_at	TMED5	50999	Transmembrane emp24 protein transport domain containing 5	13	11	10	11	11.3	17	16	14	13	14.8	14	17	16	14	14.9		1.3	0.3817	0	0	0		1.3	0.272	0	0	0
238478_at	BNC2	54796	Basonuclin 2	28	26	25	28	26.6	30	34	29	33	31.6	31	53	33	28	35.2		1.2	0.3712	0	0	0		1.3	0.4998	0	0	0
223722_at	DNAJC12	56521	DnaJ (Hsp40) homolog, subfamily C, member 12	64	65	63	89	69.4	163	117	134	164	143.2	89	95	100	84	91.7		2.1	0.1839	0	0	0		1.3	0.3301	0	0	0
218082_s_at	UBP1	7342	upstream binding protein 1 (LBP-1a)	107	102	119	125	112.9	156	142	141	142	145.1	164	133	168	136	149.2		1.3	0.2373	0	0	0		1.3	0.2633	0	0	0
227585_at	ATAD1	84896	ATPase family, AAA domain containing 1	32	37	35	32	33.8	48	44	35	40	41.4	41	46	52	40	44.6		1.2	0.4335	0	0	0		1.3	0.2269	0	0	0
243874_at	FLJ42393	401105	FLJ42393 protein	18	19	20	16	18.1	20	24	28	21	23.4	28	27	23	19	23.9		1.3	0.3985	0	0	0		1.3	0.3648	0	0	0
227056_at	KIAA0141	9812	KIAA0141	48	44	44	51	46.9	75	59	68	66	66.8	57	61	71	60	61.9		1.4	0.1949	0	0	0		1.3	0.2049	0	0	0
243463_s_at	RIT1	6016	Ras-like without CAAX 1	34	22	23	22	24.7	33	32	29	34	31.8	31	30	44	28	32.6		1.3	0.4994	0	0	0		1.3	0.5044	0	0	0
242338_at	TMEM64	169200	transmembrane protein 64	38	27	24	24	27.5	38	28	27	26	29.6	24	38	51	37	36.4		1.1	0.8989	0	0	0		1.3	0.6164	0	0	0
211758_x_at	TXNDC9	10190	thioredoxin domain containing 9 /// thioredoxin domain containing 9	249	233	242	248	242.6	293	279	276	289	283.9	329	291	339	325	320.3		1.2	0.1533	0	0	0		1.3	0.1365	0	0	0
243201_at	HNRPH2	3188	Heterogeneous nuclear ribonucleoprotein H2 (H')	13	15	17	13	14.5	19	16	16	15	16.7	23	19	18	17	19.1		1.2	0.5587	0	0	0		1.3	0.3446	0	0	0
227073_at	MAP3K2	10746	Mitogen-activated protein kinase kinase kinase 2	48	46	50	50	48.5	65	65	61	70	65.1	60	70	66	60	64		1.3	0.1356	0	0	0		1.3	0.1556	0	0	0
233011_at	ANXA1	301	Annexin A1	109	109	107	76	99	94	130	93	120	108.1	122	132	144	125	130.6		1.1	0.8508	0	0	0		1.3	0.3439	0	0	0
226178_at	SOCS4	122809	suppressor of cytokine signaling 4	114	101	111	104	107.6	136	149	145	153	145.5	125	159	169	121	142		1.4	0.1451	0	0	0		1.3	0.3206	0	0	0
224705_s_at	TNRC6A	27327	trinucleotide repeat containing 6A	152	108	133	149	134.2	148	173	168	156	161	160	193	196	163	177		1.2	0.5371	0	0	0		1.3	0.3457	0	0	0
224787_s_at	RAB18	22931	RAB18, member RAS oncogene family	275	199	228	277	242.6	374	290	241	225	277	270	342	347	326	319.9		1.1	0.7922	0	0	0		1.3	0.3596	0	0	0
226465_s_at	SON	6651	SON DNA binding protein	318	304	324	298	310.7	296	350	351	409	349.2	465	412	430	342	409.5		1.1	0.6178	0	0	0		1.3	0.2326	0	0	0
229549_at	OPN1SW	611	Opsin 1 (cone pigments), short-wave-sensitive (color blindness, tritan)	50	46	43	53	47.5	76	59	57	75	66.4	55	68	62	66	62.6		1.4	0.3292	0	0	0		1.3	0.2193	0	0	0
226733_at	PFKFB2	5208	6-phosphofructo-2-kinase/fructose-2,6-biphosphatase 2	27	22	23	18	22.3	34	27	31	27	29.5	31	30	30	27	29.4		1.3	0.4543	0	0	0		1.3	0.3407	0	0	0
226032_at	CASP2	835	caspase 2, apoptosis-related cysteine peptidase (neural precursor cell expressed, developmentally down-regulated 2)	178	164	186	184	178	194	188	193	214	197.1	235	237	227	239	234.5		1.1	0.4674	0	0	0		1.3	0.1227	0	0	0
204796_at	EML1	2009	echinoderm microtubule associated protein like 1	36	38	37	36	36.7	41	41	39	45	41.5	44	51	47	51	48.3		1.1	0.2774	0	0	0		1.3	0.1396	0	0	0
224582_s_at	NUCKS	64710	Nuclear casein kinase and cyclin-dependent kinase substrate 1	169	103	123	132	129.6	198	134	128	80	128.4	129	204	182	178	170.6		-1	0.9949	0	0	0		1.3	0.5085	0	0	0
221452_s_at	TMEM14B	81853	transmembrane protein 14B /// transmembrane protein 14B	264	194	214	231	224.4	283	241	257	207	245.4	267	282	336	302	295.4		1.1	0.7893	0	0	0		1.3	0.2939	0	0	0
229460_at			CDNA clone IMAGE:5273245	39	34	40	37	37.4	46	56	51	52	51.1	45	50	55	47	49.2		1.4	0.1856	0	0	0		1.3	0.1906	0	0	0
201067_at	PSMC2	5701	proteasome (prosome, macropain) 26S subunit, ATPase, 2	181	152	155	131	153.8	184	177	143	157	164.6	219	202	208	182	202.2		1.1	0.8347	0	0	0		1.3	0.2671	0	0	0
208093_s_at	NDEL1	81565	nudE nuclear distribution gene E homolog like 1 (A. nidulans) /// nudE nuclear distribution gene E homolog like 1 (A. nidulans)	173	145	169	176	165.6	257	218	246	262	245.1	216	221	221	212	217.8		1.5	0.173	0	0	0		1.3	0.1571	0	0	0
201539_s_at	FHL1	2273	four and a half LIM domains 1	48	101	48	99	69.4	78	38	46	109	62.4	65	161	92	72	91.2		-1.1	0.9418	0	0	0		1.3	0.7668	0	0	0
238593_at	FLJ22531	79703	hypothetical protein FLJ22531	129	133	135	180	142.7	172	164	229	223	194.5	172	226	204	156	187.5		1.4	0.4458	0	0	0		1.3	0.4199	0	0	0
221899_at	PFAAP5	10443	Hypothetical gene CG012	82	75	101	97	87.8	101	109	106	138	112.6	121	126	114	103	115.4		1.3	0.4694	0	0	0		1.3	0.3017	0	0	0
213278_at	MTMR9	66036	myotubularin related protein 9	80	66	73	85	75.6	90	93	88	102	93	110	102	88	99	99.4		1.2	0.3735	0	0	0		1.3	0.2509	0	0	0
226441_at	MAP3K2	10746	Mitogen-activated protein kinase kinase kinase 2	89	71	101	122	93.8	104	120	103	125	112.8	114	122	134	124	123.3		1.2	0.66	0	0	0		1.3	0.4357	0	0	0
230874_at			CDNA FLJ36579 fis, clone TRACH2012647	14	13	15	20	15.2	16	16	15	16	16	18	22	24	17	20		1.1	0.8965	0	0	0		1.3	0.4348	0	0	0
205339_at	SIL	6491	TAL1 (SCL) interrupting locus	67	72	70	82	72.6	85	92	104	87	91.7	84	90	108	102	95.4		1.3	0.3369	0	0	0		1.3	0.253	0	0	0
239496_at	RSU1	6251	Ras suppressor protein 1	25	22	23	27	24.6	31	27	31	44	32.7	36	38	31	26	32.3		1.3	0.4641	0	0	0		1.3	0.3503	0	0	0
1555310_a_at	PAK6	56924	p21(CDKN1A)-activated kinase 6	21	20	19	15	18.4	22	22	22	25	22.6	26	24	23	24	24.2		1.2	0.4266	0	0	0		1.3	0.2628	0	0	0
242304_at	WIBG	84305	within bgcn homolog (Drosophila)	41	34	45	34	38.1	54	52	51	51	51.9	48	53	51	48	50		1.4	0.2953	0	0	0		1.3	0.2747	0	0	0
226555_at			MRNA; cDNA DKFZp686D22106 (from clone DKFZp686D22106)	63	62	54	58	59.2	78	82	79	83	80.3	81	86	74	71	77.6		1.4	0.1408	0	0	0		1.3	0.1857	0	0	0
228381_at			CDNA clone IMAGE:5298223	35	36	43	35	36.9	47	57	48	45	49.1	50	54	55	37	48.4		1.3	0.3248	0	0	0		1.3	0.3988	0	0	0
1557738_at	RAB6IP2	23085	RAB6 interacting protein 2	25	28	25	35	28	27	33	33	31	30.7	37	41	36	33	36.7		1.1	0.7784	0	0	0		1.3	0.3182	0	0	0
214008_at	PTK9	5756	PTK9 protein tyrosine kinase 9	24	20	20	25	22.2	28	26	27	23	25.8	24	27	27	41	29.1		1.2	0.5746	0	0	0		1.3	0.4979	0	0	0
218979_at	C9orf76	80010	chromosome 9 open reading frame 76	84	69	81	77	77.5	86	97	96	89	92.2	96	105	104	103	101.7		1.2	0.3634	0	0	0		1.3	0.1629	0	0	0
202125_s_at	ALS2CR3	66008	amyotrophic lateral sclerosis 2 (juvenile) chromosome region, candidate 3	77	78	77	83	78.7	89	107	91	86	93.2	111	91	102	110	103.3		1.2	0.3743	0	0	0		1.3	0.1659	0	0	0
236755_at	FLJ11046	55773	Hypothetical protein FLJ11046	34	36	29	32	32.5	41	46	41	29	38.8	38	45	45	43	42.6		1.2	0.6344	0	0	0		1.3	0.2117	0	0	0
201963_at	ACSL1	2180	acyl-CoA synthetase long-chain family member 1	68	63	58	75	65.7	79	77	83	92	82.4	76	94	93	83	86.1		1.3	0.3703	0	0	0		1.3	0.27	0	0	0
1554450_s_at	FLJ35954	166968	hypothetical protein FLJ35954	30	25	29	33	29.1	42	42	29	31	35.8	34	43	43	34	38.1		1.2	0.5892	0	0	0		1.3	0.3259	0	0	0
202798_at	SEC24B	10427	SEC24 related gene family, member B (S. cerevisiae)	181	134	166	189	165.9	200	203	204	208	203.9	188	218	247	221	217.5		1.2	0.4491	0	0	0		1.3	0.3561	0	0	0
227312_at	SNTB2	6645	Syntrophin, beta 2 (dystrophin-associated protein A1, 59kDa, basic component 2)	30	30	28	26	28.3	33	36	32	35	34	32	39	45	34	37.1		1.2	0.2923	0	0	0		1.3	0.2994	0	0	0
234998_at	RAB11A	8766	RAB11A, member RAS oncogene family	80	57	57	63	63.7	99	91	88	82	90	71	87	91	86	83.5		1.4	0.3094	0	0	0		1.3	0.351	0	0	0
204055_s_at	CTAGE5	4253	CTAGE family, member 5	26	22	20	25	23.2	22	29	27	24	25.2	39	32	30	23	30.4		1.1	0.7879	0	0	0		1.3	0.4574	0	0	0
221768_at	SFPQ	6421	Splicing factor proline/glutamine-rich (polypyrimidine tract binding protein associated)	144	171	144	158	153.9	172	147	176	174	166.9	227	219	205	161	201.5		1.1	0.6864	0	0	0		1.3	0.3241	0	0	0
236769_at	LOC158402	158402	hypothetical protein LOC158402	31	27	33	36	31.8	37	40	32	36	36.2	38	43	47	39	41.7		1.1	0.6079	0	0	0		1.3	0.2789	0	0	0
221919_at	HNRPA1	3178	heterogeneous nuclear ribonucleoprotein A1	55	52	52	61	54.9	60	59	71	64	63.2	68	74	80	66	71.9		1.1	0.4777	0	0	0		1.3	0.1943	0	0	0
222553_x_at	OXR1	55074	oxidation resistance 1	79	68	76	78	75	86	82	78	69	78.5	89	85	103	119	98.2		1	0.8266	0	0	0		1.3	0.3052	0	0	0
1557094_at	ANXA8	244	Annexin A8	67	71	73	87	74.3	104	83	82	83	87.5	81	108	101	101	97.3		1.2	0.5428	0	0	0		1.3	0.3029	0	0	0
227356_at			CDNA FLJ26015 fis, clone MPC03596	51	50	52	39	47.8	68	68	52	65	62.8	57	62	65	67	62.6		1.3	0.417	0	0	0		1.3	0.2659	0	0	0
243149_at	EIF4G3	8672	Eukaryotic translation initiation factor 4 gamma, 3	46	38	54	47	46	49	67	62	66	60.5	63	70	67	44	60.2		1.3	0.435	0	0	0		1.3	0.473	0	0	0
1557521_a_at			CDNA clone IMAGE:5311184	32	32	39	36	34.6	35	38	40	42	38.5	49	42	46	45	45.3		1.1	0.6009	0	0	0		1.3	0.1998	0	0	0
212669_at	CAMK2G	818	calcium/calmodulin-dependent protein kinase (CaM kinase) II gamma	50	59	56	66	57.3	62	63	60	72	63.9	77	84	72	68	75		1.1	0.6594	0	0	0		1.3	0.2694	0	0	0
210175_at	C2orf3	6936	chromosome 2 open reading frame 3	77	65	61	74	68.9	99	95	92	98	95.9	77	86	98	102	90.1		1.4	0.1973	0	0	0		1.3	0.3153	0	0	0
203017_s_at	SSX2IP	117178	synovial sarcoma, X breakpoint 2 interacting protein	62	59	65	65	62.7	89	82	74	76	80.2	76	86	92	75	82		1.3	0.2167	0	0	0		1.3	0.1878	0	0	0
201688_s_at	TPD52	7163	tumor protein D52	235	183	186	191	197.7	294	217	180	137	199.4	198	276	299	274	258.6		1	0.9944	0	0	0		1.3	0.4079	0	0	0
224895_at	YAP1	10413	Yes-associated protein 1, 65kDa	140	134	124	147	135.8	182	142	105	97	127.1	166	200	179	166	177.5		-1.1	0.9195	0	0	0		1.3	0.1965	0	0	0
1558292_s_at	PIGW	284098	phosphatidylinositol glycan, class W	81	66	79	88	77.9	100	102	98	103	100.7	82	100	110	119	101.8		1.3	0.3003	0	0	0		1.3	0.3763	0	0	0
1566709_at	TNFAIP8	25816	Tumor necrosis factor, alpha-induced protein 8	12	15	13	14	13.5	14	15	15	16	15.1	19	18	15	18	17.7		1.1	0.5493	0	0	0		1.3	0.2101	0	0	0
236223_s_at	RIT1	6016	Ras-like without CAAX 1	35	35	32	32	33.4	79	39	34	26	40.5	35	45	59	39	43.7		1.2	0.83	0	0	0		1.3	0.4378	0	0	0
209067_s_at	HNRPDL	9987	heterogeneous nuclear ribonucleoprotein D-like	439	439	434	398	427.3	561	508	535	558	540.2	525	623	536	555	558.4		1.3	0.1551	0	0	0		1.3	0.1571	0	0	0
227856_at	FLJ39370	132720	hypothetical protein FLJ39370	54	40	41	59	47.8	60	76	60	62	64.3	55	57	73	66	62.4		1.3	0.4525	0	0	0		1.3	0.4421	0	0	0
201581_at	TXNDC13	56255	thioredoxin domain containing 13	133	108	117	113	117.5	162	141	143	117	139.7	138	142	171	166	153.5		1.2	0.5203	0	0	0		1.3	0.2499	0	0	0
239630_at			Transcribed locus	24	23	22	23	22.8	23	31	31	32	29.1	28	30	31	31	29.8		1.3	0.4249	0	0	0		1.3	0.1222	0	0	0
209694_at	PTS	5805	6-pyruvoyltetrahydropterin synthase	176	161	170	178	171.1	198	193	187	173	187.7	238	215	218	223	223.3		1.1	0.471	0	0	0		1.3	0.1227	0	0	0
216682_s_at	FAM48A	55578	family with sequence similarity 48, member A	32	28	25	25	27.3	36	37	33	31	34.1	36	37	37	33	35.6		1.3	0.3779	0	0	0		1.3	0.2324	0	0	0
227278_at			Transcribed locus, moderately similar to XP_512541.1 PREDICTED: similar to hypothetical protein [Pan troglodytes]	106	95	108	132	109.4	151	144	128	137	140	134	136	168	136	142.8		1.3	0.3789	0	0	0		1.3	0.3248	0	0	0
228092_at	CREM	1390	cAMP responsive element modulator	40	41	37	45	40.7	56	61	46	49	52.6	50	50	63	51	53		1.3	0.3652	0	0	0		1.3	0.2561	0	0	0
204455_at	DST	667	dystonin	174	131	169	131	149.9	198	153	163	137	161.2	199	176	205	203	195.6		1.1	0.8674	0	0	0		1.3	0.3248	0	0	0
228768_at	KIAA1961	96459	KIAA1961 gene	84	69	82	88	80.4	84	96	99	113	97.5	90	117	111	104	104.8		1.2	0.4934	0	0	0		1.3	0.2871	0	0	0
214962_s_at	NUP160	23279	nucleoporin 160kDa	30	28	27	29	28.6	38	39	28	31	33.5	38	38	40	33	37.3		1.2	0.591	0	0	0		1.3	0.1632	0	0	0
229572_at			Transcribed locus, moderately similar to XP_508230.1 PREDICTED: zinc finger protein 195 [Pan troglodytes]	44	29	41	40	38.1	38	38	42	45	40.7	53	50	44	52	49.7		1.1	0.8648	0	0	0		1.3	0.3922	0	0	0
227713_at	KATNAL1	84056	katanin p60 subunit A-like 1	78	70	85	78	77.8	91	91	94	107	95.6	104	115	98	90	101.4		1.2	0.3357	0	0	0		1.3	0.2366	0	0	0
204417_at	GALC	2581	galactosylceramidase (Krabbe disease)	188	141	144	163	157.9	188	179	186	184	184.2	199	211	209	205	205.8		1.2	0.502	0	0	0		1.3	0.2393	0	0	0
236090_at				24	25	24	25	24.5	33	34	32	30	32.4	27	32	34	36	32		1.3	0.1356	0	0	0		1.3	0.2173	0	0	0
225326_at	RBM27	54439	RNA binding motif protein 27	190	188	168	183	181.9	238	253	232	232	238.5	228	247	263	213	237		1.3	0.1524	0	0	0		1.3	0.1878	0	0	0
225354_s_at	SH3BGRL2	83699	SH3 domain binding glutamic acid-rich protein like 2	66	29	43	51	45.3	59	61	52	51	55.3	67	45	69	58	59		1.2	0.7466	0	0	0		1.3	0.6599	0	0	0
217763_s_at	RAB31	11031	RAB31, member RAS oncogene family	324	466	374	372	380.7	530	496	446	588	512.7	456	660	453	444	495.9		1.3	0.3931	0	0	0		1.3	0.4598	0	0	0
204089_x_at	MAP3K4	4216	mitogen-activated protein kinase kinase kinase 4	72	68	74	69	70.8	71	84	88	102	85.4	101	92	91	85	92.3		1.2	0.4801	0	0	0		1.3	0.1429	0	0	0
201061_s_at	STOM	2040	stomatin	463	420	411	392	420.6	518	523	468	438	485.6	538	522	543	590	547.8		1.2	0.4533	0	0	0		1.3	0.1571	0	0	0
206653_at	POLR3G	10622	Polymerase (RNA) III (DNA directed) polypeptide G (32kD)	30	27	33	27	28.9	44	36	35	43	39.1	31	43	37	41	37.7		1.4	0.3109	0	0	0		1.3	0.3286	0	0	0
221802_s_at	KIAA1598	57698	KIAA1598	210	153	188	197	185.9	220	235	258	267	244.4	226	244	253	245	241.9		1.3	0.3718	0	0	0		1.3	0.2685	0	0	0
224744_at	IMPAD1	54928	inositol monophosphatase domain containing 1	68	48	57	65	58.8	86	68	76	65	73.3	58	79	85	87	76.5		1.2	0.5198	0	0	0		1.3	0.4668	0	0	0
218352_at	RCBTB1	55213	regulator of chromosome condensation (RCC1) and BTB (POZ) domain containing protein 1	62	49	43	58	52.2	57	61	54	56	57.3	68	61	87	59	67.9		1.1	0.7607	0	0	0		1.3	0.4601	0	0	0
240572_s_at	LOC374443	374443	CLR pseudogene	20	17	17	17	17.8	22	22	19	21	20.8	21	24	28	20	23.1		1.2	0.4238	0	0	0		1.3	0.3196	0	0	0
205017_s_at	MBNL2	10150	muscleblind-like 2 (Drosophila)	39	53	38	40	42.2	49	47	49	41	46.6	40	57	63	63	54.8		1.1	0.742	0	0	0		1.3	0.5028	0	0	0
219377_at	FAM59A	64762	family with sequence similarity 59, member A	106	105	94	82	96.3	107	130	114	129	119.6	121	139	134	109	125.2		1.2	0.4252	0	0	0		1.3	0.3122	0	0	0
224759_s_at	MGC17943	90488	hypothetical protein MGC17943	345	236	294	350	302.4	437	450	433	394	428.1	397	391	401	385	393.3		1.4	0.3383	0	0	0		1.3	0.3515	0	0	0
228654_at	LOC139886	139886	hypothetical protein LOC139886	53	37	48	52	47.2	69	67	59	60	63.6	48	63	78	61	61.4		1.3	0.383	0	0	0		1.3	0.4988	0	0	0
215919_s_at	MRPS11	64963	mitochondrial ribosomal protein S11	16	20	18	22	18.8	24	22	23	19	21.8	24	25	32	18	24.5		1.2	0.615	0	0	0		1.3	0.5068	0	0	0
217659_at	KIAA0261	23063	KIAA0261	19	20	23	19	20.2	28	26	20	21	23.5	27	27	28	24	26.3		1.2	0.6379	0	0	0		1.3	0.2081	0	0	0
1556088_at	RIP	84268	RPA interacting protein	26	26	28	28	26.9	29	26	30	25	27.2	37	33	38	32	35		1	0.9671	0	0	0		1.3	0.1585	0	0	0
229111_at	MASP2	10747	Mannan-binding lectin serine peptidase 2	36	38	43	46	40.7	47	42	48	46	45.8	57	53	49	52	52.9		1.1	0.5793	0	0	0		1.3	0.2269	0	0	0
232591_s_at	TMEM30A	55754	transmembrane protein 30A	164	105	107	167	132.5	215	133	118	90	132.2	126	180	208	186	172.2		-1	0.9986	0	0	0		1.3	0.5983	0	0	0
223261_at	POLK	51426	polymerase (DNA directed) kappa	53	42	39	53	46.7	51	67	60	59	58.9	54	64	73	54	60.7		1.3	0.4872	0	0	0		1.3	0.4162	0	0	0
239081_at	LOC440064	440064	LOC440064	25	24	25	27	25	35	28	29	33	31	30	33	35	32	32.5		1.2	0.3142	0	0	0		1.3	0.1447	0	0	0
200821_at	LAMP2	3920	lysosomal-associated membrane protein 2	166	159	139	178	159.9	227	186	207	232	212.1	191	216	217	208	207.6		1.3	0.3138	0	0	0		1.3	0.2134	0	0	0
216199_s_at	MAP3K4	4216	mitogen-activated protein kinase kinase kinase 4	104	84	98	99	95.9	105	115	116	131	116.1	146	115	122	118	124.6		1.2	0.4032	0	0	0		1.3	0.2561	0	0	0
208673_s_at	SFRS3	6428	splicing factor, arginine/serine-rich 3	222	229	203	210	215.5	278	278	258	263	269	229	274	310	314	279.7		1.2	0.1717	0	0	0		1.3	0.2978	0	0	0
224928_at	SET7	80854	SET domain-containing protein 7	173	143	176	210	173.8	220	197	209	229	213.6	227	238	214	224	225.6		1.2	0.4832	0	0	0		1.3	0.3147	0	0	0
230563_at	RASGEF1A	221002	RasGEF domain family, member 1A	72	53	66	63	63.2	91	87	87	82	86.6	80	78	94	78	82		1.4	0.2465	0	0	0		1.3	0.2936	0	0	0
201862_s_at	LRRFIP1	9208	leucine rich repeat (in FLII) interacting protein 1	250	224	201	242	228.4	378	352	326	337	348	243	350	347	262	296.4		1.5	0.1533	0	0	0		1.3	0.4105	0	0	0
1560986_a_at	EHBP1	23301	EH domain binding protein 1	57	48	52	54	52.7	65	62	63	66	64	65	78	71	61	68.4		1.2	0.2596	0	0	0		1.3	0.2371	0	0	0
233123_at	SLC40A1	30061	Solute carrier family 40 (iron-regulated transporter), member 1	24	21	29	33	26.5	29	41	31	30	32.4	30	37	36	34	34.3		1.2	0.626	0	0	0		1.3	0.4049	0	0	0
230722_at	BNC2	54796	Basonuclin 2	40	39	42	37	39.5	37	46	47	59	46.6	44	69	45	51	51.3		1.2	0.6182	0	0	0		1.3	0.405	0	0	0
220397_at	MDM1	56890	Mdm4, transformed 3T3 cell double minute 1, p53 binding protein (mouse)	16	17	15	14	15.6	19	16	17	18	17.3	20	19	23	20	20.3		1.1	0.5948	0	0	0		1.3	0.196	0	0	0
1569652_at	MLLT3	4300	Myeloid/lymphoid or mixed-lineage leukemia (trithorax homolog, Drosophila); translocated to, 3	30	21	25	27	25.5	24	27	27	31	27.4	36	35	32	30	33.1		1.1	0.8464	0	0	0		1.3	0.3276	0	0	0
228512_at	FLJ20758	55037	FLJ20758 protein	46	43	45	43	44.3	45	47	53	47	47.7	66	56	63	47	57.4		1.1	0.584	0	0	0		1.3	0.3019	0	0	0
223878_at	INPP4B	8821	inositol polyphosphate-4-phosphatase, type II, 105kDa	14	15	12	10	13	23	18	17	29	21.4	13	21	17	18	16.8		1.6	0.3763	0	0	0		1.3	0.5235	0	0	0
201890_at	RRM2	6241	ribonucleotide reductase M2 polypeptide	519	440	494	462	477.8	688	614	627	652	644.5	561	672	630	619	619.5		1.3	0.1646	0	0	0		1.3	0.1865	0	0	0
226528_at	MTX3	345778	metaxin 3	52	49	51	49	50	57	59	55	67	59.4	61	70	73	57	64.8		1.2	0.3226	0	0	0		1.3	0.2222	0	0	0
209308_s_at	BNIP2	663	BCL2/adenovirus E1B 19kDa interacting protein 2	154	131	135	164	145.5	215	178	182	207	194.9	173	181	217	186	188.6		1.3	0.2976	0	0	0		1.3	0.2633	0	0	0
232134_at			CDNA FLJ11652 fis, clone HEMBA1004461	44	48	43	50	46.2	60	59	64	84	66.2	62	69	58	52	59.9		1.4	0.3014	0	0	0		1.3	0.2628	0	0	0
225838_at	EPC2	26122	enhancer of polycomb homolog 2 (Drosophila)	67	64	62	63	64.1	53	73	69	67	65.3	72	95	79	86	83		1	0.9553	0	0	0		1.3	0.2207	0	0	0
218576_s_at	DUSP12	11266	dual specificity phosphatase 12	183	183	171	178	178.4	244	216	207	203	216.8	205	229	257	236	231.3		1.2	0.2706	0	0	0		1.3	0.1686	0	0	0
240389_at	TRPM6	140803	Transient receptor potential cation channel, subfamily M, member 6	53	39	39	45	43.5	53	53	48	48	50.6	55	68	51	53	56.4		1.2	0.5726	0	0	0		1.3	0.3812	0	0	0
222883_at	C1orf163	65260	chromosome 1 open reading frame 163	32	30	39	35	33.9	39	44	37	34	38.1	50	44	47	36	44		1.1	0.6788	0	0	0		1.3	0.3563	0	0	0
213165_at	CAP350	9857	Centrosome-associated protein 350	255	162	244	236	220.7	196	252	274	201	228.4	281	246	307	315	286		1	0.9579	0	0	0		1.3	0.4588	0	0	0
227754_at	USP54	159195	ubiquitin specific peptidase 54	39	35	33	42	36.9	45	48	48	44	46.3	43	48	52	48	47.8		1.3	0.322	0	0	0		1.3	0.2414	0	0	0
212905_at	CSTF2T	23283	cleavage stimulation factor, 3' pre-RNA, subunit 2, 64kDa, tau variant	49	37	44	48	44.4	46	51	48	55	50.1	51	59	65	56	57.6		1.1	0.6276	0	0	0		1.3	0.3014	0	0	0
228968_at	ZNF449	203523	zinc finger protein 449	65	50	68	68	62.3	68	88	77	82	78.3	97	81	77	70	80.6		1.3	0.4641	0	0	0		1.3	0.3805	0	0	0
222237_s_at	ZNF228	7771	zinc finger protein 228	34	30	26	32	30.4	30	34	38	37	34.8	42	40	40	36	39.4		1.1	0.6238	0	0	0		1.3	0.2613	0	0	0
226982_at	ELL2	22936	elongation factor, RNA polymerase II, 2	71	58	56	71	63.5	114	94	87	91	95.9	70	98	76	88	82.2		1.5	0.2432	0	0	0		1.3	0.3842	0	0	0
204020_at	PURA	5813	purine-rich element binding protein A	184	167	172	187	177.2	177	197	197	204	193.5	242	248	235	197	229.4		1.1	0.5371	0	0	0		1.3	0.2128	0	0	0
213029_at	NFIB	4781	Nuclear factor I/B	190	192	200	190	192.7	204	207	217	218	211.6	269	247	228	255	249.5		1.1	0.2605	0	0	0		1.3	0.1399	0	0	0
225811_at			Transcribed locus, weakly similar to XP_510104.1 PREDICTED: similar to hypothetical protein FLJ25224 [Pan troglodytes]	156	142	153	154	151.4	210	199	178	187	193.1	187	209	195	194	195.9		1.3	0.1943	0	0	0		1.3	0.1227	0	0	0
212608_s_at	NUDT3	11165	Nudix (nucleoside diphosphate linked moiety X)-type motif 3	72	72	68	72	71	95	95	91	99	94.7	97	96	91	84	91.9		1.3	0.0866	0	0	0		1.3	0.1396	0	0	0
229885_at	HBXAP	51773	Hepatitis B virus x associated protein	30	22	34	39	30.6	35	45	46	32	39	33	45	41	40	39.6		1.3	0.6304	0	0	0		1.3	0.5191	0	0	0
203910_at	ARHGAP29	9411	Rho GTPase activating protein 29	151	159	160	155	156.3	197	182	211	172	190.2	181	205	206	219	202.2		1.2	0.29	0	0	0		1.3	0.1571	0	0	0
227013_at	LATS2	26524	LATS, large tumor suppressor, homolog 2 (Drosophila)	125	135	145	134	134.4	134	154	150	157	148.4	201	166	167	164	173.9		1.1	0.5376	0	0	0		1.3	0.2117	0	0	0
1568868_at	FLJ16008	339761	FLJ16008 protein	30	40	40	41	37.5	61	38	47	60	50.5	44	58	54	40	48.5		1.3	0.5204	0	0	0		1.3	0.4461	0	0	0
215731_s_at	MPHOSPH9	10198	M-phase phosphoprotein 9	55	48	57	60	54.8	63	55	72	72	65.3	77	66	74	67	70.8		1.2	0.5204	0	0	0		1.3	0.2173	0	0	0
225563_at	PAN3	255967	PABP1-dependent poly A-specific ribonuclease subunit PAN3	174	152	176	191	172.4	203	201	209	231	210.4	231	221	216	225	223		1.2	0.3489	0	0	0		1.3	0.1771	0	0	0
208800_at	SRP72	6731	signal recognition particle 72kDa	136	124	114	153	131.1	187	162	134	122	149.3	140	172	225	153	169.5		1.1	0.7427	0	0	0		1.3	0.4719	0	0	0
226426_at	ADNP	23394	Activity-dependent neuroprotector	120	117	118	95	112.1	115	154	136	141	135.4	137	165	146	133	144.9		1.2	0.4999	0	0	0		1.3	0.2741	0	0	0
200976_s_at	TAX1BP1	8887	Tax1 (human T-cell leukemia virus type I) binding protein 1	268	263	265	307	275.1	335	329	363	375	349.9	364	354	346	358	355.5		1.3	0.227	0	0	0		1.3	0.1409	0	0	0
210779_x_at	SIP1	8487	survival of motor neuron protein interacting protein 1	49	40	46	50	46.3	50	47	50	41	47.1	58	61	61	60	59.8		1	0.9592	0	0	0		1.3	0.1878	0	0	0
227177_at	CORO2A	7464	Coronin, actin binding protein, 2A	59	45	52	57	53.1	52	93	68	54	65.1	76	68	73	59	68.7		1.2	0.6846	0	0	0		1.3	0.3248	0	0	0
243389_at	PRB4 /// PRH1 /// PRH2	5545 /// 5554 /// 5555	proline-rich protein BstNI subfamily 4 /// proline-rich protein HaeIII subfamily 1 /// proline-rich protein HaeIII subfamily 2	16	20	14	15	16.3	17	19	20	16	18	24	21	18	22	21.1		1.1	0.7621	0	0	0		1.3	0.3457	0	0	0
200810_s_at	CIRBP	1153	cold inducible RNA binding protein	324	284	283	283	293	401	408	396	444	411.7	347	398	376	395	378.4		1.4	0.1451	0	0	0		1.3	0.1659	0	0	0
225107_at	HNRPA2B1	3181	Heterogeneous nuclear ribonucleoprotein A2/B1	195	193	187	191	191.4	270	203	212	195	218	288	247	249	211	247.1		1.1	0.5993	0	0	0		1.3	0.2326	0	0	0
209964_s_at	ATXN7	6314	ataxin 7	62	75	73	68	69.2	90	82	85	82	84.9	108	105	78	72	89.4		1.2	0.2893	0	0	0		1.3	0.4367	0	0	0
212031_at	RBM25	58517	RNA binding motif protein 25	99	107	88	109	100.4	126	107	101	122	113.6	125	138	138	118	129.5		1.1	0.6087	0	0	0		1.3	0.2253	0	0	0
203869_at	USP46	64854	ubiquitin specific peptidase 46	21	20	18	19	19.2	25	26	23	24	24.4	25	26	29	20	24.8		1.3	0.2138	0	0	0		1.3	0.322	0	0	0
226109_at	C21orf91	54149	chromosome 21 open reading frame 91	49	30	44	46	41.6	55	59	52	59	56.2	53	53	55	54	53.6		1.4	0.4612	0	0	0		1.3	0.4451	0	0	0
224725_at	MIB1	57534	mindbomb homolog 1 (Drosophila)	50	36	40	51	43.9	68	59	55	57	59.6	48	50	69	62	56.6		1.4	0.3852	0	0	0		1.3	0.4755	0	0	0
218911_at	YEATS4	8089	YEATS domain containing 4	52	45	42	45	46	57	51	47	48	50.7	47	53	70	70	59.3		1.1	0.6379	0	0	0		1.3	0.4348	0	0	0
[truncated: 54,290 more rows]
